# Supplementary material for: Fully atom-economic access to spiro-cyclic skeletons through photoredox-induced hydrogen transfer/Giese addition/dearomative cyclization/protonation cascade
Source: Royal Society of Chemistry journal article supplement (doi:10.1039/d4qo00317a), 2024-01-01
Supplement: d4qo00317a1.pdf [file d4qo00317a1.pdf]

## Supporting Information

### **Fully Atom-economic Access to Spiro-cyclic Skeletons through Photoredox-induced Hydrogen Transfer/Giese Addition/ Dearomative Cyclization/Protonation Cascade**

Guohui Zeng,<sup>a</sup> Hui Luo,<sup>b</sup> Kai Jiang,<sup>a</sup> Jianpeng Cai,<sup>a</sup> and Biaolin Yin<sup>\*a</sup>

<sup>a</sup>Key Laboratory of Functional Molecular Engineering of Guangdong Province, School of Chemistry and Chemical Engineering, South China University of Technology (SCUT), Guangzhou 510640, China

<sup>b</sup>Guangzhou Addenda Chemical Corp. Ltd, Guangzhou 510663, China

\*E-mail: [blyin@scut.edu.cn](mailto:blyin@scut.edu.cn)

# Table of contents

|                                                                  |     |
|------------------------------------------------------------------|-----|
| I. General information.....                                      | S1  |
| II. General procedure for preparing enamide materials .....      | S1  |
| III. Investigations of reaction conditions .....                 | S12 |
| IV. General procedure for the dearomatization reactions.....     | S13 |
| V. Synthesis of multicyclic <i>N</i> -containing skeletons ..... | S33 |
| VI. Mechanism studies.....                                       | S35 |
| vii-1. Radical trapping experiment .....                         | S35 |
| vii-2. Electrochemical measurements .....                        | S35 |
| vii-3. Stern–Volmer luminescence quenching studies.....          | S37 |
| VII. Computational details.....                                  | S38 |
| VIII. Crystallographic data .....                                | S47 |
| IX. Reference .....                                              | S54 |
| X. NMR spectra .....                                             | S55 |

## I. General information

Unless specified otherwise, all experiments were performed under N<sub>2</sub> atmosphere. All reagents and starting materials were purchased from commercial suppliers and used as received. FT-IR spectra were obtained with thin film samples or KBr pellets on a Bruker Vector 22 spectrometer, and data are expressed in cm<sup>-1</sup>. <sup>1</sup>H, <sup>13</sup>C, <sup>19</sup>F spectra were recorded on Bruker AVANCE 400 (400 MHz for <sup>1</sup>H; 100 MHz for <sup>13</sup>C; 376 MHz for <sup>19</sup>F) and Bruker AVANCE 500 (500 MHz for <sup>1</sup>H; 126 MHz for <sup>13</sup>C; 471 MHz for <sup>19</sup>F), <sup>1</sup>H NMR and <sup>13</sup>C NMR chemical shifts were determined relative to internal standard TMS at δ 0.0. Chemical shifts (δ) are reported in ppm and coupling constants (*J*) are in Hertz (Hz). The following abbreviations were used to explain the multiplicities: s = singlet, d = doublet, t = triplet, q = quartet, m = multiplet, dd = doublet of doublet. The HRMS measurements were recorded on a TOF analyzer using an ESI source in the positive mode. The crystal data was collected on a Agilent Gemini E diffractometer (Mo, 50kV 40mA) and reduced by CrysAlisPro (Rigaku). Melting points were determined using a hot stage apparatus. Column chromatography was performed on silica gel (200–300 mesh) with mixtures of petroleum ether and ethyl acetate as the eluent or other solvents.

## II. General procedure for preparing enamide materials

### Method a:

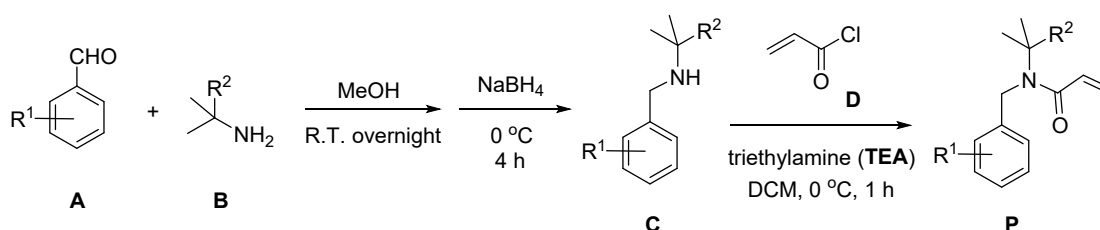

### Step 1:

To a solution of commercially available compound benzaldehyde derivatives **A** (5 mmol, 1.0 eq) and the corresponding amine **B** (20 mmol, 4.0 eq) in MeOH (50 mL) was stirred at RT for overnight. After cooled the reaction solution to 0 °C, NaBH<sub>4</sub> (285 mg, 7.5 mmol, 1.5 eq) was added slowly in portions, then this reaction mixture was stirred at RT for another 4 hours. Then the reaction was quenched with water and extracted with EtOAc after removing MeOH under reduced pressure. The combined organic layer was dried over anhydrous Na<sub>2</sub>SO<sub>4</sub> and filtered. The solvent was removed under reduced pressure to give crude product **C** which was used directly in the next step without purification.

### Step 2:

To a solution of crude product **C** in  $\text{CH}_2\text{Cl}_2$  (100 mL) was added **TEA** (760 mg, 7.5 mmol, 1.5 eq) and stirred at 0 °C for 10 mins, then acryloyl chloride **D** (452 mg, 5 mmol, 1.0 eq) was added dropwise to the reaction solution and continuously stirred for another 1 hour. The reaction mixture was quenched with saturated aqueous ammonium chloride and extracted with  $\text{CH}_2\text{Cl}_2$  three times. The combined organic layers were washed with brine, dried over sodium sulfate, filtered, concentrated, and purified by column chromatography on silica gel (15 : 1 petroleum ether : EtOAc) to give the starting material **P**.

### Method b:

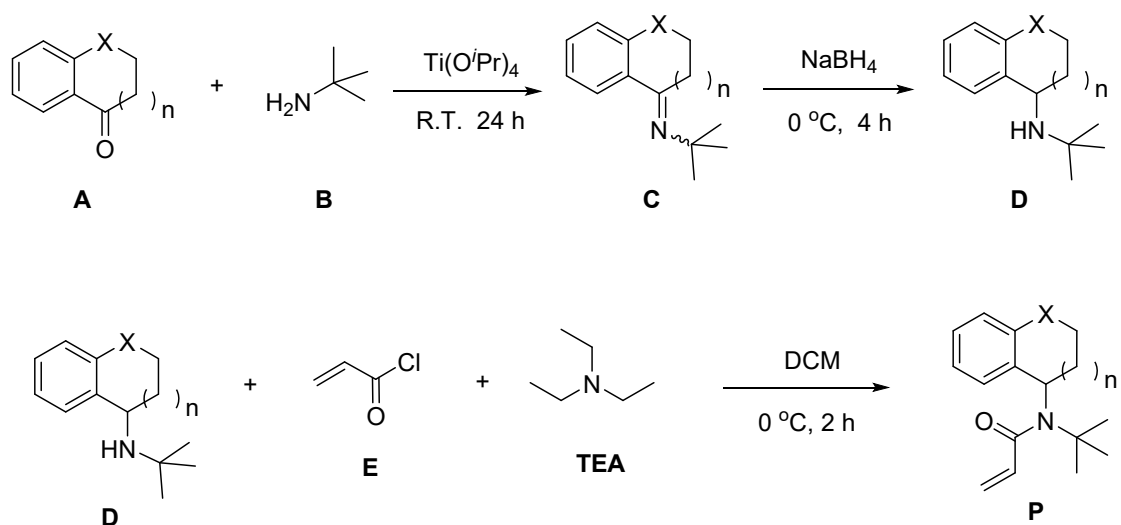

#### Step 1:

To a solution of commercially available compound **A** (5 mmol, 1.0 eq) and 2-methylpropan-2-amine **B** (1.46 g, 20 mmol, 4.0 eq) in  $\text{Ti}(\text{O}^i\text{Pr})_4$  (20 mL) was stirred at RT for 24 hours. After cooled the reaction solution to 0 °C, MeOH (20 mL) was added dropwise and followed by  $\text{NaBH}_4$  (285 mg, 7.5 mmol, 1.5 eq) slowly in portions, then this reaction mixture was stirred at RT for another 4 hours. Then the reaction was quenched by excess water and filtered with silica gel, the filter cake washed with EtOAc three times. The organic filtrate washed by  $\text{H}_2\text{O}$  and dried over anhydrous  $\text{Na}_2\text{SO}_4$  and filtered. The solvent was removed under reduced pressure to give crude product **D** which was used directly in the next step without purification.

#### Step 2:

To a solution of the above crude product **D** in  $\text{CH}_2\text{Cl}_2$  (100 mL) was added **TEA** (760 mg, 7.5 mmol, 1.5 eq) and stirred at 0 °C for 10 mins, then acryloyl chloride **E** (452 mg, 5 mmol, 1.0eq) was added

dropwise to the reaction solution and continuously stirred for another 2 hours. The reaction mixture was quenched with saturated aqueous ammonium chloride and extracted with  $\text{CH}_2\text{Cl}_2$  three times. The combined organic layers were washed with brine, dried over sodium sulfate, filtered, concentrated, and purified by column chromatography on silica gel (15 : 1 petroleum ether : EtOAc) to give the starting material **P**.

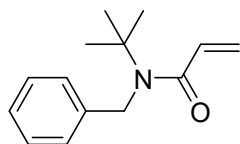

N-benzyl-N-(tert-butyl)acrylamide (**1a**)

Prepared according to **method a** which benzaldehyde, tert-butylamine and acryloyl chloride were used. The title compound was obtained as a white solid (8.6 g, 40 mmol, 80% over two steps, m.p. = 61.3 ~ 63.6 °C).

NMR: <sup>1</sup>H NMR (400 MHz, Chloroform-*d*) δ 7.36 (t, *J* = 7.5 Hz, 2H), 7.29 – 7.21 (m, 3H), 6.42 – 6.26 (m, 2H), 5.56 – 5.50 (m, 1H), 4.63 (s, 2H), 1.45 (s, 9H). <sup>13</sup>C NMR (101 MHz, Chloroform-*d*) δ 168.5, 139.4, 131.5, 128.7, 127.2, 127.0, 125.7, 57.7, 48.9, 28.5.

IR (KBr, cm<sup>-1</sup>): 2813, 1651, 1603, 1487, 1413, 1387, 1195, 988, 794, 747, 716.

HRMS (ESI): calcd for C<sub>14</sub>H<sub>20</sub>NO<sup>+</sup> [M + H]<sup>+</sup>: 218.1539; found: 218.1535.

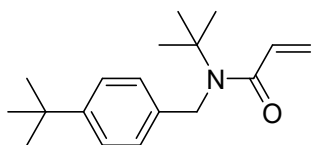

N-(tert-butyl)-N-(4-(tert-butyl)benzyl)acrylamide (**1b**)

Prepared according to **method a** which 4-(tert-butyl)benzaldehyde, tert-butylamine and acryloyl chloride were used. The title compound was obtained as a colorless viscous liquid (1.1 g, 4.1 mmol, 82% over two steps).

NMR: <sup>1</sup>H NMR (400 MHz, Chloroform-*d*) δ 7.39 (d, *J* = 8.6 Hz, 2H), 7.21 – 7.13 (m, 2H), 6.42 (dd, *J* = 16.6, 10.0 Hz, 1H), 6.32 (dd, *J* = 16.6, 2.4 Hz, 1H), 5.54 (dd, *J* = 10.0, 2.3 Hz, 1H), 4.62 (s, 2H), 1.48 (s, 9H), 1.34 (s, 9H). <sup>13</sup>C NMR (101 MHz, Chloroform-*d*) δ 168.6, 150.0, 136.3, 131.7, 127.0, 125.7, 125.4, 57.7, 48.7, 34.5, 31.4, 28.6.

IR (KBr, cm<sup>-1</sup>): 1656, 1580, 1515, 1349, 1112, 990, 882, 791, 550.

HRMS (ESI): calcd for C<sub>18</sub>H<sub>28</sub>NO<sup>+</sup> [M + H]<sup>+</sup>: 274.2165; found: 274.2161.

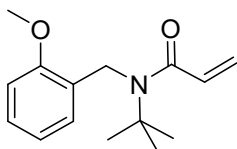

N-(tert-butyl)-N-(2-methoxybenzyl)acrylamide (**1c**)

Prepared according to **method a** which 2-methoxybenzaldehyde, tert-butylamine and acryloyl chloride were used. The title compound was obtained as a brown oil.

NMR:  $^1\text{H}$  NMR (400 MHz, Chloroform-*d*)  $\delta$  7.29 – 7.20 (m, 2H), 6.96 (t,  $J = 7.5$  Hz, 1H), 6.86 (d,  $J = 8.6$  Hz, 1H), 6.28 (s, 1H), 6.27 (d,  $J = 1.7$  Hz, 1H), 5.47 (dd,  $J = 7.0, 5.4$  Hz, 1H), 4.55 (s, 2H), 3.84 (s, 3H), 1.45 (s, 9H).  $^{13}\text{C}$  NMR (101 MHz, Chloroform-*d*)  $\delta$  168.6, 155.8, 131.5, 127.9, 127.4, 126.9, 126.7, 120.5, 109.7, 57.4, 55.1, 44.2, 28.2.

IR(KBr,  $\text{cm}^{-1}$ ): 2715, 1660, 1586, 1470 1345, 1202, 1065, 785, 731.

HRMS (ESI): calcd for  $\text{C}_{15}\text{H}_{22}\text{NO}_2^+$  [ $\text{M} + \text{H}$ ] $^+$ : 248.1645; found: 248.1641.

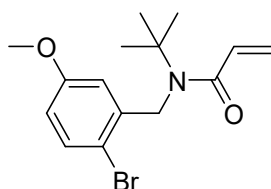

N-(2-bromo-5-methoxybenzyl)-N-(tert-butyl)acrylamide (**1d**)

Prepared according to **method a** which 2-bromo-5-methoxybenzaldehyde, tert-butylamine and acryloyl chloride were used. The title compound was obtained as a white solid (1.3 g, 4.1 mmol, 82% over two steps, m.p. = 101.1 ~ 103.6.  $^{\circ}\text{C}$ ).

NMR:  $^1\text{H}$  NMR (400 MHz, Chloroform-*d*)  $\delta$  7.46 (dd,  $J = 8.7, 1.1$  Hz, 1H), 6.91 (d,  $J = 3.1$  Hz, 1H), 6.73 (dd,  $J = 8.7, 3.1$  Hz, 1H), 6.38 – 6.30 (m, 1H), 6.25 (dd,  $J = 16.6, 10.0$  Hz, 1H), 5.61 – 5.53 (m, 1H), 4.55 (s, 2H), 3.78 (s, 3H), 1.49 (s, 9H).  $^{13}\text{C}$  NMR (101 MHz, Chloroform-*d*)  $\delta$  168.5, 159.5, 139.2, 133.5, 131.1, 127.8, 114.2, 113.9, 111.6, 57.8, 55.5, 49.8, 28.4.

IR (KBr,  $\text{cm}^{-1}$ ): 2718, 1655, 1584, 1354, 1295, 1194, 1054, 778, 607.

HRMS (ESI): calcd for  $\text{C}_{15}\text{H}_{21}\text{BrNO}_2^+$  [ $\text{M} + \text{H}$ ] $^+$ : 326.0750; found: 326.0745.

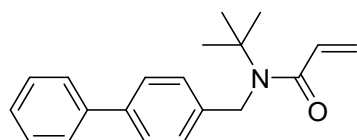

N-([1,1'-biphenyl]-4-ylmethyl)-N-(tert-butyl)acrylamide (**1e**)

Prepared according to **method a** which [1,1'-biphenyl]-4-carbaldehyde, tert-butylamine and acryloyl chloride were used. The title compound was obtained as a white solid (1.0 g, 3.6 mmol, 73% over two steps, m.p. = 75.1 ~ 77.9  $^{\circ}\text{C}$ ).

NMR:  $^1\text{H}$  NMR (400 MHz, Chloroform-*d*)  $\delta$  7.64 – 7.60 (m, 4H), 7.47 (t,  $J = 7.5$  Hz, 2H), 7.40 – 7.35 (m, 1H), 7.34 (d,  $J = 8.4$  Hz, 2H), 6.45 (dd,  $J = 16.6, 10.0$  Hz, 1H), 6.36 (dd,  $J = 16.6, 2.4$  Hz, 1H), 5.58 (dd,  $J = 10.0, 2.4$  Hz, 1H), 4.70 (s, 2H), 1.52 (s, 9H).  $^{13}\text{C}$  NMR (101 MHz, Chloroform-*d*)  $\delta$  168.6, 140.6, 140.1, 138.5, 131.6, 128.8, 127.5, 127.4, 127.3, 127.0, 126.2, 57.8, 48.8, 28.6.

IR (KBr,  $\text{cm}^{-1}$ ): 2716, 1611, 1485, 1362, 1072, 989, 771, 697.

HRMS (ESI): calcd for  $C_{20}H_{24}NO^+$   $[M + H]^+$ : 294.1852; found: 294.1850.

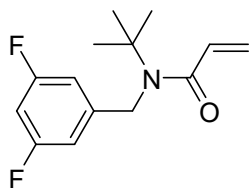

N-(tert-butyl)-N-(3,5-difluorobenzyl)acrylamide (**1f**)

Prepared according to **method a** which 3,5-difluorobenzaldehyde, tert-butylamine and acryloyl chloride were used. The title compound was obtained as a brown oil (1.0 g, 4.2 mmol, 84% over two steps).

NMR:  $^1H$  NMR (400 MHz, Chloroform-*d*)  $\delta$  6.76 – 6.70 (m, 2H), 6.69 – 6.60 (m, 1H), 6.25 (d,  $J = 6.1$  Hz, 2H), 5.52 (t,  $J = 6.2$  Hz, 1H), 4.55 (s, 2H), 1.39 (s, 9H).  $^{13}C$  NMR (101 MHz, Chloroform-*d*)  $\delta$  168.4, 163.4 (dd,  $J = 249.6, 12.7$  Hz), 144.2, 130.9, 127.8, 109.7 – 107.3 (dd,  $J = 18.8$  Hz, 7.0 Hz), 102.6 (t,  $J = 25.4$  Hz), 57.8, 48.4 (t,  $J = 2.2$  Hz), 28.5.  $^{19}F$  NMR (376 MHz, Chloroform-*d*)  $\delta$  -108.6.

IR (KBr,  $cm^{-1}$ ): 2716, 1622, 1456, 1363, 1196, 992, 885, 798, 777, 672.

HRMS (ESI): calcd for  $C_{14}H_{18}F_2NO^+$   $[M + H]^+$ : 254.1351; found: 254.1346.

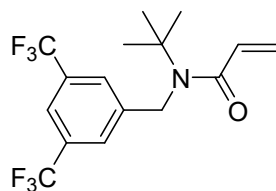

N-(3,5-bis(trifluoromethyl)benzyl)-N-(tert-butyl)acrylamide (**1g**)

Prepared according to **method a** which 3,5-bis(trifluoromethyl)benzaldehyde, tert-butylamine and acryloyl chloride were used. The title compound was obtained as a brown oil (1.4 g, 4.1 mmol, 82% over two steps).

NMR:  $^1H$  NMR (400 MHz, Chloroform-*d*)  $\delta$  7.79 (s, 1H), 7.70 (s, 2H), 6.37 – 6.31 (m, 1H), 6.26 (dd,  $J = 16.6, 9.8$  Hz, 1H), 5.60 (dd,  $J = 9.8, 2.4$  Hz, 1H), 4.74 (s, 2H), 1.45 (s, 9H).  $^{13}C$  NMR (101 MHz, Chloroform-*d*)  $\delta$  168.6, 142.6, 132.3 (q,  $J = 33.4$  Hz), 130.6, 128.4, 126.0 – 125.9 (m), 123.1 (d,  $J = 272.9$  Hz), 121.3 (t,  $J = 4.2$  Hz), 57.9, 48.4, 28.6.  $^{19}F$  NMR (376 MHz, Chloroform-*d*)  $\delta$  -63.0.

IR (KBr,  $cm^{-1}$ ): 2716, 1616, 1465, 1366, 1177, 992, 848, 796 707, 604.

HRMS (ESI): calcd for  $C_{16}H_{18}F_6NO^+$   $[M + H]^+$ : 354.1287; found: 354.1281.

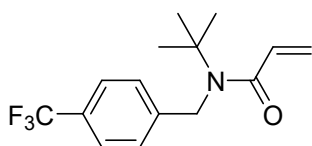



N-(tert-butyl)-N-(4-(trifluoromethyl)benzyl)acrylamide (**1h**)

Prepared according to **method a** which 4-(trifluoromethyl)benzaldehyde, tert-butylamine and acryloyl chloride were used. The title compound was obtained as a yellow oil (1.1 g, 4.0 mmol, 80% over two steps).

NMR:  $^1\text{H}$  NMR (400 MHz, Chloroform-*d*)  $\delta$  7.60 (d,  $J = 8.1$  Hz, 2H), 7.35 (d,  $J = 8.0$  Hz, 2H), 6.32 – 6.24 (m, 2H), 5.56 – 5.49 (m, 1H), 4.66 (s, 2H), 1.42 (s, 9H).  $^{13}\text{C}$  NMR (101 MHz, Chloroform-*d*)  $\delta$  168.4, 143.7, 131.0, 129.4 (d,  $J = 32.6$  Hz), 127.7, 126.0, 125.7 (q,  $J = 3.8$  Hz), 128.2 – 119.5 (m), 57.7, 48.6, 28.4.  $^{19}\text{F}$  NMR (376 MHz, Chloroform-*d*)  $\delta$  -62.5.

IR (KBr,  $\text{cm}^{-1}$ ): 2718, 1652, 1585, 1362, 1196, 1067, 883, 773.

HRMS (ESI): calcd for  $\text{C}_{15}\text{H}_{19}\text{F}_3\text{NO}^+$  [ $\text{M} + \text{H}$ ] $^+$ : 286.1413; found: 286.1409.

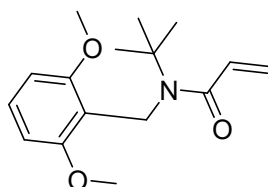

N-(tert-butyl)-N-(2,6-dimethoxybenzyl)acrylamide (**1i**)

Prepared according to **method a** which 2,6-dimethoxybenzaldehyde, tert-butylamine and acryloyl chloride were used. The title compound was obtained as a white solid (960 mg, 3.45 mmol, 69% over two steps. m.p. = 92.3 ~ 94. °C).

NMR:  $^1\text{H}$  NMR (400 MHz, Chloroform-*d*)  $\delta$  7.18 (t,  $J = 8.3$  Hz, 1H), 6.75 (dd,  $J = 17.0, 10.6$  Hz, 1H), 6.51 (d,  $J = 8.4$  Hz, 2H), 6.06 (dd,  $J = 16.9, 2.1$  Hz, 1H), 5.44 (dd,  $J = 10.6, 2.1$  Hz, 1H), 4.71 (s, 2H), 3.76 (s, 6H), 1.32 (s, 9H).  $^{13}\text{C}$  NMR (101 MHz, Chloroform-*d*)  $\delta$  169.8, 158.6, 134.1, 128.6, 123.0, 115.0, 103.8, 57.2, 55.2, 40.7, 28.3.

IR (KBr,  $\text{cm}^{-1}$ ): 2716, 1612, 1472, 1363, 1203, 1113, 777, 724.

HRMS (ESI): calcd for  $\text{C}_{16}\text{H}_{24}\text{NO}_3^+$  [ $\text{M} + \text{H}$ ] $^+$ : 278.1751; found: 278.1746.

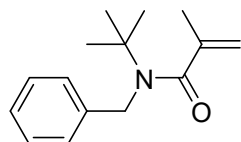

N-benzyl-N-(tert-butyl)methacrylamide (**1j**)

Prepared according to **method a** which benzaldehyde, tert-butylamine and methacryloyl chloride were used. The title compound was obtained as a off-white solid (960 mg, 3.45 mmol, 73% over two steps. m.p. = 96.0 ~ 97.9 °C).

NMR:  $^1\text{H}$  NMR (400 MHz, Chloroform-*d*)  $\delta$  7.33 (t,  $J = 7.3$  Hz, 2H), 7.26 – 7.18 (m, 3H), 5.04 – 4.99 (m, 1H), 4.92 (p,  $J = 1.7$  Hz, 1H), 4.67 (s, 2H), 1.92 (s, 3H), 1.42 (s, 9H).  $^{13}\text{C}$  NMR (101 MHz, Chloroform-*d*)  $\delta$  174.7, 143.0, 140.1, 128.5, 126.9, 126.0, 113.4, 57.6, 50.7, 28.6, 20.8.

IR (KBr,  $\text{cm}^{-1}$ ): 2716, 1618, 1451, 1362, 1191, 907, 779, 704.

HRMS (ESI): calcd for  $\text{C}_{15}\text{H}_{22}\text{NO}^+$   $[\text{M} + \text{H}]^+$ : 232.1696; found: 232.1691.

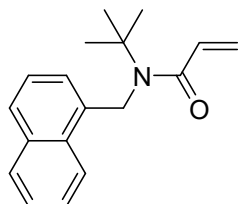

#### N-(tert-butyl)-N-(naphthalen-1-ylmethyl)acrylamide (**1k**)

Prepared according to **method a** which 1-naphthaldehyde, tert-butylamine and acryloyl chloride were used. The title compound was obtained as a colorless viscous liquid (970 mg, 3.6 mmol, 72% over two steps).

NMR:  $^1\text{H}$  NMR (400 MHz, Chloroform-*d*)  $\delta$  7.95 (dd,  $J = 7.2, 2.4$  Hz, 2H), 7.83 (dd,  $J = 6.2, 3.4$  Hz, 1H), 7.63 – 7.49 (m, 4H), 6.39 – 6.23 (m, 2H), 5.49 (dd,  $J = 9.7, 2.8$  Hz, 1H), 5.07 (s, 2H), 1.56 (s, 9H).  $^{13}\text{C}$  NMR (101 MHz, Chloroform-*d*)  $\delta$  168.7, 134.3, 133.6, 131.4, 129.8, 129.0, 127.6, 127.3, 126.4, 126.0, 125.6, 123.6, 121.8, 57.7, 46.8, 28.3.

IR (KBr,  $\text{cm}^{-1}$ ): 2716, 1615, 1483, 1362, 1196, 989, 796, 731, 601.

HRMS (ESI): calcd for  $\text{C}_{18}\text{H}_{22}\text{NO}^+$   $[\text{M} + \text{H}]^+$ : 268.1696; found: 268.1691.

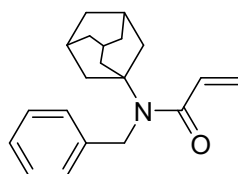

#### N-(adamantan-1-yl)-N-benzylacrylamide (**1l**)

Prepared according to **method a** which benzaldehyde, amantadine and acryloyl chloride were used. The title compound was obtained as a yellow solid (1.1 g, 3.9 mmol, 78% over two steps. m.p. = 138.0 ~ 139.1  $^{\circ}\text{C}$ ).

NMR:  $^1\text{H}$  NMR (400 MHz, Chloroform-*d*)  $\delta$  7.42 – 7.34 (m, 2H), 7.32 – 7.25 (m, 4H), 6.39 (dd,  $J = 16.6, 9.9$  Hz, 1H), 6.29 (dd,  $J = 16.6, 2.6$  Hz, 1H), 5.53 (dd,  $J = 10.0, 2.5$  Hz, 1H), 4.67 (s, 2H), 2.26 (d,  $J = 3.4$  Hz, 6H), 2.11 – 2.05 (m, 3H), 1.71 – 1.61 (m, 6H).  $^{13}\text{C}$  NMR (101 MHz, Chloroform-*d*)  $\delta$  168.6, 139.8, 132.1, 128.7, 127.0, 125.8, 59.2, 47.7, 39.6, 36.4, 30.1.

IR (KBr,  $\text{cm}^{-1}$ ): 2716, 1647, 1606, 1452, 1361, 1196, 1105, 998, 776, 698.

HRMS (ESI): calcd for  $C_{20}H_{26}NO^+$   $[M + H]^+$ : 296.2009; found: 296.2005.

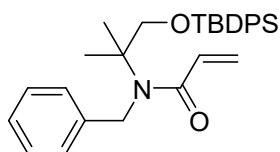

N-benzyl-N-(1-((tert-butyl-diphenylsilyl)oxy)-2-methylpropan-2-yl)acrylamide (**1m**)

Prepared according to **method a** which benzaldehyde, 1-((tert-butyl-diphenylsilyl)oxy)-2-methylpropan-2-amine and acryloyl chloride were used. The title compound was obtained as a colorless oil (1.6 g, 3.5 mmol, 70% over two steps).

NMR:  $^1H$  NMR (400 MHz, Chloroform-*d*)  $\delta$  7.67 – 7.60 (m, 4H), 7.44 – 7.29 (m, 8H), 7.29 – 7.21 (m, 3H), 6.38 (dd,  $J = 16.6, 9.8$  Hz, 1H), 6.30 (dd,  $J = 16.7, 2.7$  Hz, 1H), 5.53 (dd,  $J = 9.8, 2.7$  Hz, 1H), 4.81 (s, 2H), 4.00 (s, 2H), 1.43 (s, 6H), 1.09 (s, 9H).  $^{13}C$  NMR (101 MHz, Chloroform-*d*)  $\delta$  168.6, 139.7, 135.6, 133.4, 131.6, 129.6, 128.7, 127.6, 127.2, 126.9, 125.6, 68.8, 61.2, 50.2, 26.9, 24.2, 19.3.

IR (KBr,  $cm^{-1}$ ): 2717, 1601, 1361, 1108, 777, 611, 505.

HRMS (ESI): calcd for  $C_{30}H_{38}NO_2Si^+$   $[M + H]^+$ : 472.2666; found: 472.2661.

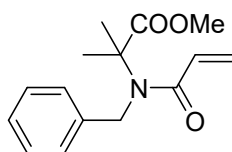

methyl 2-(N-benzylacrylamido)-2-methylpropanoate (**1n**)

Prepared according to **method a** which benzaldehyde, methyl 2-amino-2-methylpropanoate and acryloyl chloride were used. The title compound was obtained as a beige solid (1.6 g, 3.5 mmol, 70% over two steps. m.p. = 56.6 ~ 58.6 °C).

NMR:  $^1H$  NMR (500 MHz, Chloroform-*d*)  $\delta$  7.41 (d,  $J = 7.5$  Hz, 2H), 7.37 (t,  $J = 7.5$  Hz, 2H), 7.28 (d,  $J = 7.1$  Hz, 1H), 6.40 – 6.30 (m, 2H), 5.61 (dd,  $J = 8.5, 3.8$  Hz, 1H), 4.66 (s, 2H), 3.75 (s, 3H), 1.42 (s, 6H).  $^{13}C$  NMR (126 MHz, Chloroform-*d*)  $\delta$  174.6, 167.3, 138.3, 129.1, 128.8, 128.5, 127.3, 125.8, 61.4, 52.2, 47.1, 23.6.

IR (KBr,  $cm^{-1}$ ): 2718, 1660, 1613, 1355, 1284, 1200, 1066, 983, 779, 697.

HRMS (ESI): calcd for  $C_{15}H_{20}NO_3^+$   $[M + H]^+$ : 262.1438; found: 262.1433.

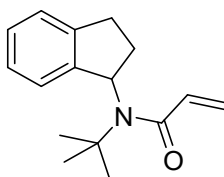

N-(tert-butyl)-N-(2,3-dihydro-1H-inden-1-yl)acrylamide (**1o**)

Prepared according to **method b** which 2,3-dihydro-1H-inden-1-one was used. The title compound was obtained as a brown oil (1.6 g, 3.5 mmol, 70% over two steps).

NMR:  $^1\text{H}$  NMR (500 MHz, Chloroform-*d*)  $\delta$  7.20 (q,  $J = 6.2, 5.7$  Hz, 3H), 7.10 (s, 1H), 5.99 (d,  $J = 16.5$  Hz, 1H), 5.83 – 5.72 (m, 1H), 5.29 (t,  $J = 8.0$  Hz, 1H), 5.09 (d,  $J = 9.6$  Hz, 1H), 3.08 (dd,  $J = 16.2, 10.2$  Hz, 1H), 2.96 – 2.87 (m, 1H), 2.52 (q,  $J = 9.7$  Hz, 1H), 2.26 (q,  $J = 11.1, 10.2$  Hz, 1H), 1.60 (s, 9H).  $^{13}\text{C}$  NMR (126 MHz, Chloroform-*d*)  $\delta$  168.3, 144.8, 140.7, 132.6, 127.3, 126.9, 125.1, 124.2, 123.0, 60.2, 58.3, 34.0, 29.7, 29.5.

IR(KBr,  $\text{cm}^{-1}$ ): 2719, 1650, 1480, 1354, 1133, 777, 645.

HRMS(ESI): calcd for  $\text{C}_{16}\text{H}_{22}\text{NO}^+$  [ $\text{M} + \text{H}$ ] $^+$ : 244.1696; found: 244.1693.

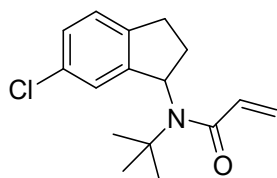

N-(tert-butyl)-N-(6-chloro-2,3-dihydro-1H-inden-1-yl)acrylamide (**1p**)

Prepared according to **method b** which 6-chloro-2,3-dihydro-1H-inden-1-one was used. The title compound was obtained as a brown oil (1.6 g, 3.5 mmol, 70% over two steps).

NMR:  $^1\text{H}$  NMR (400 MHz, Chloroform-*d*)  $\delta$  7.14 – 7.08 (m, 2H), 7.01 (s, 1H), 6.01 (d,  $J = 16.4$  Hz, 1H), 5.78 (dd,  $J = 16.5, 10.2$  Hz, 1H), 5.22 (t,  $J = 9.2$  Hz, 1H), 5.14 (d,  $J = 10.3$  Hz, 1H), 3.06 – 2.98 (m, 1H), 2.88 – 2.79 (m, 1H), 2.55 – 2.46 (m, 1H), 2.31 – 2.19 (m, 1H), 1.56 (s, 9H).  $^{13}\text{C}$  NMR (101 MHz, Chloroform-*d*)  $\delta$  167.9, 146.7, 139.2, 132.7, 132.5, 127.4, 126.1, 124.8, 123.0, 59.9, 58.3, 34.1, 29.5, 29.2.

IR(KBr,  $\text{cm}^{-1}$ ): 2812, 1652, 1608, 1474, 1360, 1164, 980, 878, 736, 662.

HRMS(ESI): calcd for  $\text{C}_{16}\text{H}_{21}\text{ClNO}^+$  [ $\text{M} + \text{H}$ ] $^+$ : 278.1306; found: 278.1302.

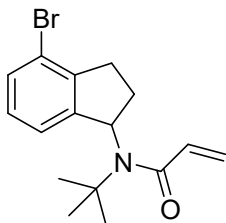

N-(4-bromo-2,3-dihydro-1H-inden-1-yl)-N-(tert-butyl)acrylamide (**1q**)

Prepared according to **method b** which 4-bromo-2,3-dihydro-1H-inden-1-one was used. The title compound was obtained as a brown oil (1.6 g, 3.5 mmol, 70% over two steps).

NMR:  $^1\text{H}$  NMR (500 MHz, Chloroform-*d*)  $\delta$  7.34 (d,  $J = 7.5$  Hz, 1H), 7.03 (dd,  $J = 13.6, 5.7$  Hz, 2H), 6.00 (d,  $J = 16.5$  Hz, 1H), 5.85 – 5.73 (m, 1H), 5.30 (q,  $J = 11.8, 10.1$  Hz, 1H), 5.15 (d,  $J = 9.8$  Hz, 1H), 3.10 (dd,  $J = 16.9, 10.3$  Hz, 1H), 2.90 – 2.81 (m, 1H), 2.53 (q,  $J = 9.9, 9.3$  Hz, 1H), 2.26 (p,  $J = 9.5$  Hz, 1H), 1.57 (s, 9H).  $^{13}\text{C}$  NMR (126 MHz, Chloroform-*d*)  $\delta$  168.1, 146.8, 141.1, 132.5, 130.3, 128.7, 124.8, 121.8, 120.7, 60.9, 58.3, 33.0, 31.1, 29.5.

IR(KBr,  $\text{cm}^{-1}$ ): 2818, 1652, 1569, 1451, 1389, 1201, 995, 769.

HRMS(ESI): calcd for  $\text{C}_{16}\text{H}_{21}\text{BrNO}^+$  [ $\text{M} + \text{H}$ ] $^+$ : 322.0801; found: 322.0797.

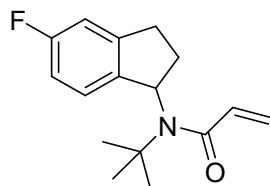

N-(tert-butyl)-N-(5-fluoro-2,3-dihydro-1H-inden-1-yl)acrylamide (**1r**)

Prepared according to **method b** which 5-fluoro-2,3-dihydro-1H-inden-1-one was used. The title compound was obtained as a brown oil (1.6 g, 3.5 mmol, 70% over two steps).

NMR:  $^1\text{H}$  NMR (500 MHz, Chloroform-*d*)  $\delta$  7.00 (s, 1H), 6.86 (dd,  $J = 22.6, 8.6$  Hz, 2H), 5.98 (d,  $J = 16.5$  Hz, 1H), 5.86 – 5.68 (m, 1H), 5.23 (s, 1H), 5.11 (d,  $J = 9.1$  Hz, 1H), 3.06 (dd,  $J = 16.4, 10.3$  Hz, 1H), 2.93 – 2.84 (m, 1H), 2.54 (q,  $J = 10.0, 9.3$  Hz, 1H), 2.33 – 2.22 (m, 1H), 1.58 (s, 9H).  $^{13}\text{C}$  NMR (126 MHz, Chloroform-*d*)  $\delta$  168.2, 162.5 (d,  $J = 244.7$  Hz), 143.1 (d,  $J = 8.1$  Hz), 140.3, 132.6, 124.4, 124.1 (d,  $J = 8.8$  Hz), 114.0 (d,  $J = 22.8$  Hz), 112.0 (d,  $J = 22.1$  Hz), 59.5, 58.3, 34.2, 29.7, 29.5.  $^{19}\text{F}$  NMR (471 MHz, Chloroform-*d*)  $\delta$  -115.9.

IR(KBr,  $\text{cm}^{-1}$ ): 2716, 1609, 1485, 1362, 1128, 976, 777, 616.

HRMS(ESI): calcd for  $\text{C}_{16}\text{H}_{21}\text{FNO}^+$  [ $\text{M} + \text{H}$ ] $^+$ : 262.1602; found: 262.1598.

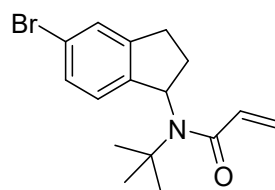

N-(5-bromo-2,3-dihydro-1H-inden-1-yl)-N-(tert-butyl)acrylamide (**1s**)

Prepared according to **method b** which 5-bromo-2,3-dihydro-1H-inden-1-one was used. The title compound was obtained as a brown oil (1.6 g, 3.5 mmol, 70% over two steps).

NMR:  $^1\text{H}$  NMR (500 MHz, Chloroform-*d*)  $\delta$  7.36 (s, 1H), 7.29 (d,  $J = 7.9$  Hz, 1H), 6.95 (d,  $J = 7.2$  Hz, 1H), 6.02 (d,  $J = 16.5$  Hz, 1H), 5.89 – 5.69 (m, 1H), 5.28 – 5.06 (m, 2H), 3.07 (dd,  $J = 16.3, 10.3$  Hz, 1H), 2.94 – 2.86 (m, 1H), 2.52 (q,  $J = 9.8, 9.3$  Hz, 1H), 2.34 – 2.21 (m, 1H), 1.58 (s, 9H).  $^{13}\text{C}$  NMR

(126 MHz, Chloroform-*d*)  $\delta$  168.1, 143.9, 143.2, 132.5, 130.0, 128.3, 124.8, 124.4, 121.0, 59.8, 58.3, 34.0, 29.6, 29.5.

IR(KBr,  $\text{cm}^{-1}$ ): 2717, 1651, 1471, 1360, 1267, 1138, 980, 863, 772, 673.

HRMS(ESI): calcd for  $\text{C}_{16}\text{H}_{21}\text{BrNO}^+$   $[\text{M} + \text{H}]^+$ : 322.0801; found: 322.0796.

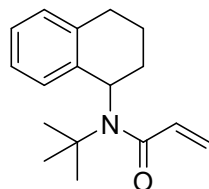

N-(tert-butyl)-N-(1,2,3,4-tetrahydronaphthalen-1-yl)acrylamide (**1t**)

Prepared according to **method b** which 3,4-dihydronaphthalen-1(2H)-one was used. The title compound was obtained as a colorless oil (1.6 g, 3.5 mmol, 70% over two steps).

NMR:  $^1\text{H}$  NMR (400 MHz, Chloroform-*d*)  $\delta$  7.26 – 7.19 (m, 1H), 7.18 – 7.12 (m, 2H), 7.11 – 7.08 (m, 1H), 6.09 (dd,  $J = 16.5, 2.4$  Hz, 1H), 5.96 (dd,  $J = 16.5, 10.1$  Hz, 1H), 5.18 (dd,  $J = 10.0, 2.4$  Hz, 1H), 4.98 (t,  $J = 9.0$  Hz, 1H), 2.90 – 2.77 (m, 2H), 2.18 – 2.10 (m, 2H), 2.07 – 2.00 (m, 1H), 1.88 – 1.78 (m, 1H), 1.63 (s, 9H).  $^{13}\text{C}$  NMR (101 MHz, Chloroform-*d*)  $\delta$  167.6, 139.3, 136.3, 132.7, 129.1, 126.7, 126.4, 126.1, 124.8, 58.6, 55.0, 32.7, 29.4, 29.4, 23.3.

IR(KBr,  $\text{cm}^{-1}$ ): 2716, 1608, 1486, 1362, 1264, 1095, 777, 612.

HRMS(ESI): calcd for  $\text{C}_{17}\text{H}_{24}\text{NO}^+$   $[\text{M} + \text{H}]^+$ : 258.1852; found: 258.1849.

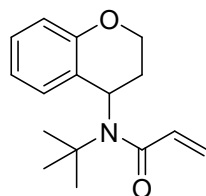

N-(tert-butyl)-N-(chroman-4-yl)acrylamide (**1u**)

Prepared according to **method b** which chroman-4-one was used. The title compound was obtained as a brown oil (1.6 g, 3.5 mmol, 70% over two steps).

NMR:  $^1\text{H}$  NMR (500 MHz, Chloroform-*d*)  $\delta$  7.17 – 7.11 (m, 2H), 6.89 (t,  $J = 7.4$  Hz, 1H), 6.81 (d,  $J = 8.1$  Hz, 1H), 6.09 (d,  $J = 16.4$  Hz, 1H), 5.95 (dd,  $J = 16.4, 10.2$  Hz, 1H), 5.23 (d,  $J = 10.1$  Hz, 1H), 5.10 (dd,  $J = 11.6, 6.5$  Hz, 1H), 4.39 (d,  $J = 11.5$  Hz, 1H), 4.19 (t,  $J = 12.0$  Hz, 1H), 2.63 – 2.53 (m, 1H), 2.08 (dd,  $J = 13.5, 6.4$  Hz, 1H), 1.62 (s, 9H).  $^{13}\text{C}$  NMR (126 MHz, Chloroform-*d*)  $\delta$  167.8, 154.6, 132.3, 128.3, 126.9, 125.6, 125.5, 121.5, 117.1, 66.4, 58.8, 50.5, 31.0, 29.4.

IR(KBr,  $\text{cm}^{-1}$ ): 2718, 1606, 1487, 1360, 1215, 1112, 773, 605.

HRMS(ESI): calcd for  $\text{C}_{16}\text{H}_{22}\text{NO}_2^+$   $[\text{M} + \text{H}]^+$ : 260.1645; found: 260.1641.

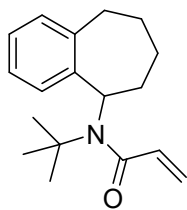

N-(tert-butyl)-N-(6,7,8,9-tetrahydro-5H-benzo[7]annulen-5-yl)acrylamide (**1v**)

Prepared according to **method b** which 6,7,8,9-tetrahydro-5H-benzo[7]annulen-5-one was used. The title compound was obtained as a brown oil (1.6 g, 3.5 mmol, 70% over two steps).

NMR:  $^1\text{H}$  NMR (500 MHz, Chloroform-*d*)  $\delta$  7.35 (d,  $J = 7.5$  Hz, 1H), 7.23 – 7.18 (m, 1H), 7.16 (d,  $J = 4.0$  Hz, 2H), 6.36 (dd,  $J = 16.5, 9.9$  Hz, 1H), 6.27 (dd,  $J = 16.6, 2.4$  Hz, 1H), 5.42 (dd,  $J = 9.9, 2.4$  Hz, 1H), 4.90 (d,  $J = 9.8$  Hz, 1H), 2.89 (dd,  $J = 14.6, 6.5$  Hz, 1H), 2.78 (t,  $J = 13.5$  Hz, 1H), 2.10 – 1.92 (m, 4H), 1.73 (d,  $J = 13.6$  Hz, 1H), 1.45 (s, 9H), 1.34 (q,  $J = 12.6$  Hz, 1H).  $^{13}\text{C}$  NMR (126 MHz, Chloroform-*d*)  $\delta$  168.8, 142.5, 139.8, 134.5, 130.2, 126.7, 126.3, 126.1, 125.0, 59.3, 59.1, 39.3, 36.8, 32.2, 28.7, 27.1.

IR(KBr,  $\text{cm}^{-1}$ ): 2717, 1606, 1423, 1361, 1197, 1066, 777, 610.

HRMS(ESI): calcd for  $\text{C}_{18}\text{H}_{26}\text{NO}^+$  [ $\text{M} + \text{H}$ ] $^+$ : 272.2009; found: 272.2004.

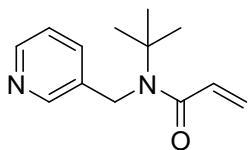

N-(tert-butyl)-N-(pyridin-3-ylmethyl)acrylamide (**1w**)

Prepared according to **method a** which nicotinaldehyde, tert-butylamine and acryloyl chloride were used. The title compound was obtained as a brown-yellow oil (1.6 g, 3.5 mmol, 70% over two steps).

NMR:  $^1\text{H}$  NMR (400 MHz, Chloroform-*d*)  $\delta$  8.56 – 8.47 (m, 2H), 7.60 – 7.49 (m, 1H), 7.33 – 7.23 (m, 1H), 6.38 – 6.26 (m, 2H), 5.56 (dd,  $J = 8.4, 3.8$  Hz, 1H), 4.64 (s, 2H), 1.43 (s, 9H).  $^{13}\text{C}$  NMR (101 MHz, Chloroform-*d*)  $\delta$  168.3, 148.6, 147.7, 134.9, 133.4, 130.9, 127.7, 123.5, 57.7, 46.7, 28.5.

IR (KBr,  $\text{cm}^{-1}$ ): 2715, 1647, 1507, 1361, 1195, 996, 798, 635.

HRMS (ESI): calcd for  $\text{C}_{13}\text{H}_{19}\text{N}_2\text{O}^+$  [ $\text{M} + \text{H}$ ] $^+$ : 219.1492; found: 219.1489.

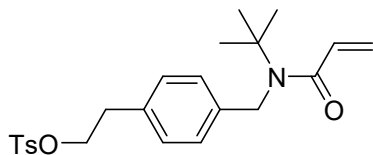

4-((N-(tert-butyl)acrylamido)methyl)phenethyl 4-methylbenzenesulfonate(**1x**)

Prepared according to **method a** which 4-formylphenethyl 4-methylbenzenesulfonate, tert-butylamine and acryloyl chloride were used. The title compound was obtained as a white solid (1.3 g, 4.1 mmol, 82% over two steps. m.p. = 78.1 ~ 79.9. °C).

NMR:  $^1\text{H}$  NMR (500 MHz, Chloroform-*d*)  $\delta$  7.77 – 7.70 (m, 2H), 7.32 (d,  $J = 8.2$  Hz, 2H), 7.16 – 7.12 (m, 4H), 6.36 (dd,  $J = 16.7, 9.7$  Hz, 1H), 6.29 (dd,  $J = 16.6, 2.7$  Hz, 1H), 5.56 – 5.50 (m, 1H), 4.60 (s, 2H), 4.22 (t,  $J = 7.1$  Hz, 2H), 2.96 (t,  $J = 7.1$  Hz, 2H), 2.44 (s, 3H), 1.44 (s, 9H).  $^{13}\text{C}$  NMR (126 MHz, Chloroform-*d*)  $\delta$  168.3, 144.7, 138.0, 135.0, 132.9, 131.4, 129.7, 129.2, 127.7, 127.1, 125.8, 70.3, 57.6, 48.5, 34.7, 28.4, 21.5.

IR (KBr,  $\text{cm}^{-1}$ ): 2719, 1650, 1585, 1352, 1178, 1059, 904, 779, 663.

HRMS (ESI): calcd for  $\text{C}_{23}\text{H}_{30}\text{NO}_4\text{S}^+$   $[\text{M} + \text{H}]^+$ : 416.1890; found: 416.1882.



### III. Investigations of reaction conditions

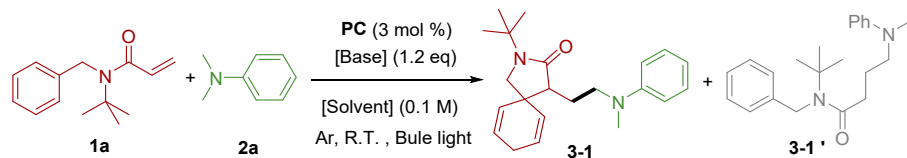

| Entry              | PC       | Base                                              | Solvent               | Yield <sup>b</sup> (%) |
|--------------------|----------|---------------------------------------------------|-----------------------|------------------------|
| 1                  | Ir(1121) | NaOAc                                             | DMA                   | 41 (27)                |
| 2                  | 4CzIPN   | NaOAc                                             | DMA                   | 62 (25)                |
| 3                  | 3DPAFIPN | NaOAc                                             | DMA                   | 64 (23)                |
| 4                  | 3DPAFIPN | NaOAc                                             | DCM                   | 44 (5)                 |
| 5                  | 3DPAFIPN | NaOAc                                             | MeCN                  | 70 (15)                |
| 6 <sup>c</sup>     | 3DPAFIPN | NaOAc                                             | MeCN/H <sub>2</sub> O | Trace (0)              |
| 7 <sup>d</sup>     | 3DPAFIPN | NaOAc                                             | DMA/H <sub>2</sub> O  | 87 (9)                 |
| 8 <sup>e</sup>     | 3DPAFIPN | NaOAc                                             | DMA/H <sub>2</sub> O  | 84 (13)                |
| 9 <sup>f</sup>     | 3DPAFIPN | NaOAc                                             | DMA/H <sub>2</sub> O  | 81 (4)                 |
| 10 <sup>d</sup>    | 3DPAFIPN | K <sub>3</sub> PO <sub>4</sub> ·3H <sub>2</sub> O | DMA/H <sub>2</sub> O  | 49 (10)                |
| 11 <sup>d</sup>    | 3DPAFIPN | Na <sub>2</sub> CO <sub>3</sub>                   | DMA/H <sub>2</sub> O  | 28 (1)                 |
| 12 <sup>d</sup>    | 3DPAFIPN | LiOAc                                             | DMA/H <sub>2</sub> O  | 82 (16)                |
| 13 <sup>d</sup>    | 3DPAFIPN | DBU                                               | DMA/H <sub>2</sub> O  | 84 (16)                |
| 14 <sup>d, g</sup> | 3DPAFIPN | NaOAc                                             | DMA/H <sub>2</sub> O  | 75 (10)                |
| 15 <sup>d, h</sup> | 3DPAFIPN | NaOAc                                             | DMA/H <sub>2</sub> O  | 88 (8)                 |
| 16 <sup>d, i</sup> | 3DPAFIPN | NaOAc                                             | DMA/H <sub>2</sub> O  | 0 (0)                  |
| 17 <sup>d, j</sup> | -        | NaOAc                                             | DMA/H <sub>2</sub> O  | 0 (0)                  |

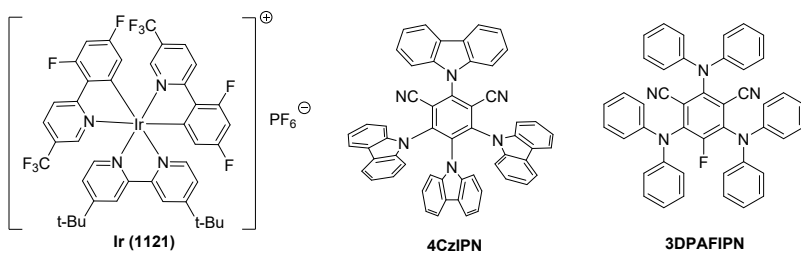

<sup>a</sup> Reaction conditions: **1a** (0.2 mmol), **2a** (0.3 mmol), PC (3 mol%), Base (0.24 mmol), Visible-light irradiation with blue LEDs ( $2 \times 15$  W, 445 nm) under Argon atmosphere for 7 h. <sup>b</sup> Determined by <sup>1</sup>H NMR using CH<sub>2</sub>Br<sub>2</sub> as the internal standard. Yield of the **3-1'** is shown in parentheses. <sup>c</sup> Ratio of volume is MeCN/H<sub>2</sub>O = 8/2. <sup>d</sup> Ratio of volume is DMA/H<sub>2</sub>O = 8/2. <sup>e</sup> Ratio of volume is DMA/H<sub>2</sub>O = 9/1. <sup>f</sup> Ratio of volume is DMA/H<sub>2</sub>O = 7/3. <sup>g</sup> with 1.0 equiv. of **2a**. <sup>h</sup> with 2.0 equiv. of **2a**. <sup>i</sup> without blue light. <sup>j</sup> without PC. DMA = *N,N*-dimethylacetamide. DBU = 1,8-diazabicyclo[5.4.0]undec-7-ene.

#### IV. General procedure for the dearomatization reactions

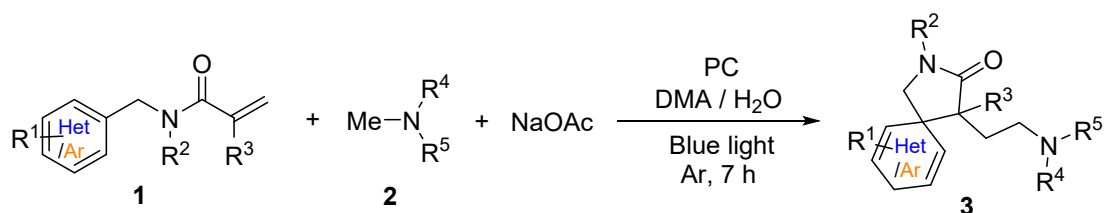

Standard Conditions:

To a 5-mL scintillation vial equipped with a stirrer bar and the requisite acrylamide **1** (0.3 mmol, 1.0 eq) was then added to the vial. The vial then charged with *N*-methyl amine **2** (0.6 mmol, 2.0 eq), sodium acetate (30 mg, 0.36 mmol, 1.2 eq) and 3DPAFIPN (PC) (6 mg, 0.009 mmol, 3 mol%), followed by made up to a total of 3.0 mL by addition of DMA and H<sub>2</sub>O (*v* / *v* = 4 / 1). The reaction mixture was thoroughly degassed with argon via freeze-pump-thaw for 3 cycles, after degassed the vial was sealed and positioned approximately 10 cm from 2×15W blue LEDs. The mixture was stirred at room temperature for 7 hours under argon atmosphere. Afterwards, the reaction solution was washed by H<sub>2</sub>O and extracted with EA for 3 times, the organic layer was concentrated by rotary evaporation. The crude product was purified by silica gel column chromatography (PE / EA = 20 / 1 for Ar, PE / EA = 1 / 1 for Heter and other cases) to obtain the desired product **3**. the details data of the products are summarized below.

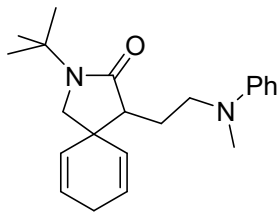

2-(tert-butyl)-4-(2-(methyl(phenyl)amino)ethyl)-2-azaspiro[4.5]deca-6,9-dien-3-one (**3-1**)

brown oil, 73 mg, 72% yield.

NMR:  $^1\text{H}$  NMR (400 MHz, Chloroform-*d*)  $\delta$  7.19 (t,  $J = 8.0$  Hz, 2H), 6.71 (d,  $J = 8.2$  Hz, 2H), 6.65 (t,  $J = 7.4$  Hz, 1H), 5.94 – 5.86 (m, 2H), 5.65 (dd,  $J = 10.4, 2.2$  Hz, 1H), 5.53 (dd,  $J = 10.1, 2.2$  Hz, 1H), 3.50 – 3.32 (m, 2H), 3.25 (d,  $J = 9.8$  Hz, 1H), 3.19 (d,  $J = 9.8$  Hz, 1H), 2.89 (s, 3H), 2.76 – 2.68 (m, 2H), 2.17 (t,  $J = 6.8$  Hz, 1H), 1.95 – 1.87 (m, 1H), 1.60 – 1.52 (m, 1H), 1.39 (s, 9H).  $^{13}\text{C}$  NMR (101 MHz, Chloroform-*d*)  $\delta$  174.8, 149.4, 130.1, 129.0, 127.1, 126.7, 125.6, 115.7, 112.1, 56.6, 53.8, 51.4, 51.1, 41.4, 37.6, 27.6, 26.6, 23.1.

IR(KBr,  $\text{cm}^{-1}$ ): 2718, 1677, 1635, 1507, 1361, 1064, 946, 766, 606, 459.

HRMS(ESI): calcd for  $\text{C}_{22}\text{H}_{31}\text{N}_2\text{O}^+$  [ $\text{M} + \text{H}$ ] $^+$ : 339.2431; found: 339.2426.

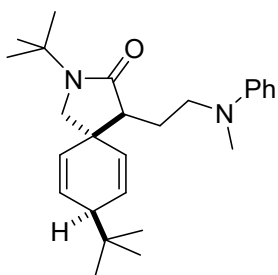

2,8-di-tert-butyl-4-(2-(methyl(phenyl)amino)ethyl)-2-azaspiro[4.5]deca-6,9-dien-3-one (**3-2**)

Brownish yellow oil, 80 mg, 68% yield, d.r. > 20:1.

NMR:  $^1\text{H}$  NMR (400 MHz, Chloroform-*d*)  $\delta$  7.19 (t,  $J = 7.9$  Hz, 2H), 6.74 (d,  $J = 8.2$  Hz, 2H), 6.64 (t,  $J = 7.2$  Hz, 1H), 5.91 (t,  $J = 12.1$  Hz, 2H), 5.68 (d,  $J = 10.3$  Hz, 1H), 5.57 (d,  $J = 10.2$  Hz, 1H), 3.69 – 3.60 (m, 1H), 3.45 – 3.36 (m, 1H), 3.25 – 3.13 (m, 2H), 2.87 (s, 3H), 2.45 (q,  $J = 2.6$  Hz, 1H), 2.18 – 2.13 (m, 1H), 1.72 – 1.59 (m, 2H), 1.39 (s, 9H), 0.91 (s, 9H).  $^{13}\text{C}$  NMR (101 MHz, Chloroform-*d*)  $\delta$  175.6, 149.5, 131.0, 129.0, 128.9, 128.2, 128.0, 115.8, 112.3, 56.5, 53.8, 51.2, 50.8, 46.3, 41.7, 37.6, 34.0, 27.7, 23.3.

IR(KBr,  $\text{cm}^{-1}$ ): 2717, 1594, 1507, 1472, 1223, 1083, 915, 749, 528.

HRMS(ESI): calcd for  $\text{C}_{26}\text{H}_{39}\text{N}_2\text{O}^+$  [ $\text{M} + \text{H}$ ] $^+$ : 395.3057; found: 395.3051.

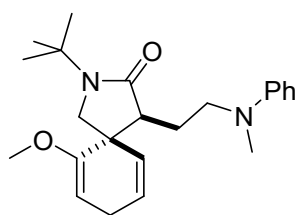

**P1**

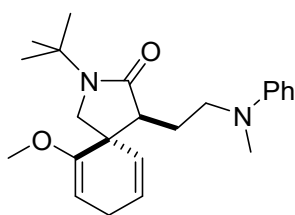

**P2**

2-(tert-butyl)-6-methoxy-4-(2-(methyl(phenyl)amino)ethyl)-2-azaspiro[4.5]deca-6,9-dien-3-one (**3-3**)

**P1** 41 mg, 40% yield, as a gray solid. **P2** 23 mg, 27% yield, as a brown oil. d.r. = 1.5:1

NMR:

[**P1**]  $^1\text{H}$  NMR (400 MHz, Chloroform-*d*)  $\delta$  7.20 (t,  $J = 8.1$  Hz, 2H), 6.69 (d,  $J = 8.8$  Hz, 2H), 6.65 (t,  $J = 7.2$  Hz, 1H), 5.93 – 5.86 (m, 1H), 5.64 – 5.58 (m, 1H), 4.88 – 4.83 (m, 1H), 3.75 (d,  $J = 9.3$  Hz, 1H), 3.56 (s, 3H), 3.47 – 3.38 (m, 1H), 3.32 – 3.23 (m, 1H), 3.07 (d,  $J = 9.3$  Hz, 1H), 2.93 – 2.84 (m, 6H), 2.03 – 1.93 (m, 1H), 1.61 – 1.53 (m, 1H), 1.41 (s, 9H).  $^{13}\text{C}$  NMR (101 MHz, Chloroform-*d*)  $\delta$  174.6, 152.6, 149.3, 128.9, 127.0, 124.9, 115.6, 112.1, 94.2, 54.1, 53.8, 53.6, 50.8, 46.5, 43.9, 37.6, 27.6, 26.6, 23.1.

[**P2**] NMR:  $^1\text{H}$  NMR (400 MHz, Chloroform-*d*)  $\delta$  7.20 (t,  $J = 8.1$  Hz, 2H), 6.72 (d,  $J = 8.2$  Hz, 2H), 6.66 (t,  $J = 7.2$  Hz, 1H), 5.88 – 5.80 (m, 1H), 5.54 – 5.46 (m, 1H), 4.81 (t,  $J = 3.8$  Hz, 1H), 2.23 (t,  $J = 6.7$  Hz, 1H), 2.05 – 1.94 (m, 1H), 1.61 – 1.50 (m, 1H), 1.40 (s, 9H).  $^{13}\text{C}$  NMR (101 MHz, Chloroform-*d*)  $\delta$  174.63, 155.68, 149.41, 131.12, 128.90, 125.65, 115.61, 112.12, 92.32, 77.32, 77.00, 76.68, 55.54, 53.81, 53.44, 51.41, 50.47, 43.39, 37.56, 27.49, 26.50, 22.86.

IR(KBr,  $\text{cm}^{-1}$ ): 2821, 1674, 1598, 1504, 1360, 1218, 1023, 943, 754, 692.

HRMS(ESI): calcd for  $\text{C}_{23}\text{H}_{33}\text{N}_2\text{O}_2^+$  [ $\text{M} + \text{H}$ ] $^+$ : 369.2537; found: 369.2531.

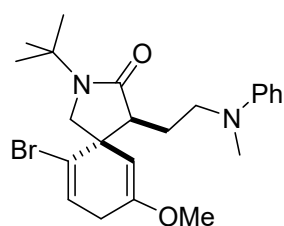

6-bromo-2-(tert-butyl)-9-methoxy-4-(2-(methyl(phenyl)amino)ethyl)-2-azaspiro[4.5]deca-6,9-dien-3-one (**3-4**)

Beige solid, 90 mg, 68% yield, d.r. > 20:1, m.p. = 117.2 – 119.3 °C

NMR:  $^1\text{H}$  NMR (500 MHz, Chloroform-*d*)  $\delta$  7.20 – 7.16 (m, 2H), 6.67 – 6.62 (m, 3H), 6.22 (t,  $J = 3.8$  Hz, 1H), 4.63 (s, 1H), 3.81 (d,  $J = 9.6$  Hz, 1H), 3.54 (s, 3H), 3.51 – 3.43 (m, 1H), 3.35 – 3.28 (m, 1H), 3.13 (d,  $J = 9.6$  Hz, 1H), 2.96 – 2.90 (m, 1H), 2.90 (s, 3H), 2.87 (t,  $J = 4.6$  Hz, 2H), 1.99 – 1.90 (m,

1H), 1.61 – 1.51 (m, 1H), 1.41 (s, 9H). <sup>13</sup>C NMR (126 MHz, Chloroform-*d*) δ 174.0, 153.2, 149.2, 129.6, 129.0, 126.5, 115.8, 112.0, 94.6, 56.0, 54.3, 54.1, 50.5, 49.2, 48.5, 37.8, 31.7, 27.7, 23.1.

IR(KBr, cm<sup>-1</sup>): 2717, 1594, 1471, 1218, 1026, 925, 750, 694.

HRMS(ESI): calcd for C<sub>23</sub>H<sub>32</sub>BrN<sub>2</sub>O<sub>2</sub><sup>+</sup> [M + H]<sup>+</sup>: 447.1642; found: 447.1636.

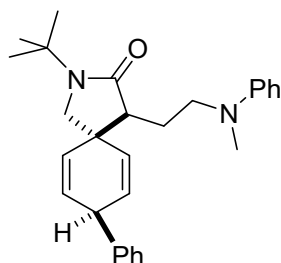

2-(tert-butyl)-4-(2-(methyl(phenyl)amino)ethyl)-8-phenyl-2-azaspiro[4.5]deca-6,9-dien-3-one (**3-5**)

Brown oil, 75 mg, 60% yield, d.r. > 20:1.

NMR: <sup>1</sup>H NMR (400 MHz, Chloroform-*d*) δ 7.27 – 7.13 (m, 7H), 6.73 (d, *J* = 8.2 Hz, 2H), 6.66 (t, *J* = 7.2 Hz, 1H), 5.96 – 5.83 (m, 2H), 5.75 – 5.68 (m, 1H), 5.65 – 5.58 (m, 1H), 4.02 – 3.95 (m, 1H), 3.68 – 3.57 (m, 1H), 3.51 – 3.39 (m, 1H), 3.32 (d, *J* = 9.7 Hz, 1H), 3.24 (d, *J* = 9.8 Hz, 1H), 2.88 (s, 3H), 2.26 (dd, *J* = 8.6, 4.5 Hz, 1H), 1.86 – 1.75 (m, 1H), 1.72 – 1.60 (m, 1H), 1.42 (s, 9H). <sup>13</sup>C NMR (101 MHz, Chloroform-*d*) δ 175.2, 149.4, 143.0, 131.0, 129.7, 129.6, 129.1, 128.7, 127.7, 126.6, 126.5, 115.9, 112.3, 56.3, 53.9, 51.2, 50.7, 42.4, 41.6, 37.8, 27.8, 23.4.

IR(KBr, cm<sup>-1</sup>): 2718, 1621, 1503, 1363, 1230, 1070, 909, 749, 605.

HRMS(ESI): calcd for C<sub>28</sub>H<sub>35</sub>N<sub>2</sub>O<sup>+</sup> [M + H]<sup>+</sup>: 415.2744; found: 415.2737.

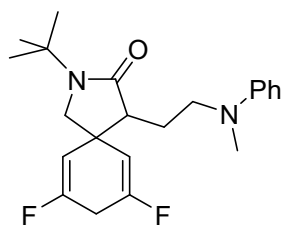

2-(tert-butyl)-7,9-difluoro-4-(2-(methyl(phenyl)amino)ethyl)-2-azaspiro[4.5]deca-6,9-dien-3-one (**3-6**)

Brown oil, 75 mg, 67% yield.

NMR: <sup>1</sup>H NMR (500 MHz, Chloroform-*d*) δ 7.22 (t, *J* = 7.5 Hz, 2H), 6.72 (d, *J* = 7.9 Hz, 2H), 6.68 (t, *J* = 6.9 Hz, 1H), 5.26 (d, *J* = 16.2 Hz, 1H), 5.13 (d, *J* = 15.4 Hz, 1H), 3.52 – 3.39 (m, 2H), 3.31 (d, *J* = 10.0 Hz, 1H), 3.24 (d, *J* = 9.8 Hz, 1H), 3.17 – 3.07 (m, 2H), 2.90 (s, 3H), 2.22 (t, *J* = 5.9 Hz, 1H), 1.88 – 1.81 (m, 1H), 1.53 – 1.46 (m, 1H), 1.39 (s, 9H). <sup>19</sup>F NMR (471 MHz, Chloroform-*d*) δ -103.7 (d, *J* = 17.3 Hz), -105.5 (d, *J* = 15.6 Hz).

IR(KBr, cm<sup>-1</sup>): 2719, 1613, 1362, 1203, 1102, 1067, 858, 771, 692, 619.

HRMS(ESI): calcd for  $C_{22}H_{29}F_2N_2O^+$   $[M + H]^+$ : 375.2242; found: 375.2236.

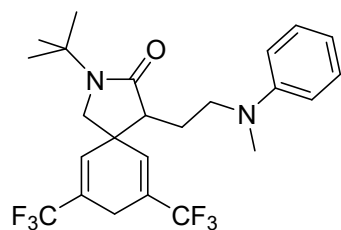

2-(tert-butyl)-4-(2-(methyl(phenyl)amino)ethyl)-7,9-bis(trifluoromethyl)-2-azaspiro[4.5]deca-6,9-dien-3-one (**3-7**)

Brown oil, 99 mg, 70% yield.

NMR:  $^1H$  NMR (500 MHz, Chloroform-*d*)  $\delta$  7.21 (t,  $J = 7.9$  Hz, 2H), 6.72 – 6.67 (m, 3H), 6.26 (s, 1H), 6.19 (s, 1H), 3.46 – 3.35 (m, 3H), 3.26 (d,  $J = 10.4$  Hz, 1H), 3.03 (s, 2H), 2.86 (s, 3H), 2.41 (t,  $J = 6.7$  Hz, 1H), 1.94 – 1.85 (m, 1H), 1.47 – 1.43 (m, 1H), 1.42 (s, 9H).  $^{13}C$  NMR (126 MHz, Chloroform-*d*)  $\delta$  173.4, 149.4, 131.3 (q,  $J = 5.5$  Hz), 129.2, 128.7 (q,  $J = 5.5$  Hz), 126.8 (dd,  $J = 74.9, 31.7$  Hz), 127.5 – 125.9 (m), 123.8 (d,  $J = 16.0$  Hz), 121.7 (d,  $J = 15.7$  Hz), 116.6, 112.4, 54.6, 54.5, 50.8, 50.6, 43.1, 37.6, 27.6, 23.2, 21.6.  $^{19}F$  NMR (471 MHz, Chloroform-*d*)  $\delta$  -69.5, -69.7.

IR(KBr,  $cm^{-1}$ ): 2722, 1594, 1506, 1362, 1274, 1188, 898, 760, 660.

HRMS(ESI): calcd for  $C_{24}H_{29}F_6N_2O^+$   $[M + H]^+$ : 475.2179; found: 475.2173.

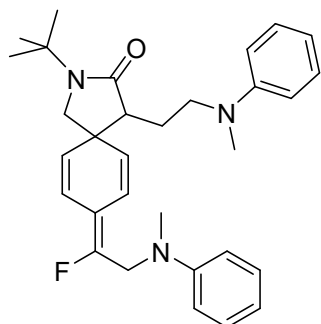

2-(tert-butyl)-8-(1-fluoro-2-(methyl(phenyl)amino)ethylidene)-4-(2-(methyl(phenyl)amino)ethyl)-2-azaspiro[4.5]deca-6,9-dien-3-one (**3-8**)

Brown oil, 32 mg, 22% yield.

NMR:  $^1H$  NMR (500 MHz, Chloroform-*d*)  $\delta$  7.2 (t,  $J = 8.0$  Hz, 2H), 7.2 (t,  $J = 8.0$  Hz, 2H), 6.8 (dd,  $J = 16.9, 8.0$  Hz, 3H), 6.7 (d,  $J = 11.3$  Hz, 1H), 6.6 (dd,  $J = 15.0, 7.7$  Hz, 3H), 6.4 (d,  $J = 10.1$  Hz, 1H), 5.8 (d,  $J = 10.4$  Hz, 1H), 5.7 (d,  $J = 10.1$  Hz, 1H), 4.2 (d,  $J = 3.2$  Hz, 1H), 4.2 (d,  $J = 2.3$  Hz, 1H), 3.5 – 3.4 (m, 1H), 3.3 – 3.3 (m, 2H), 3.2 (d,  $J = 9.9$  Hz, 1H), 2.9 (s, 3H), 2.8 (s, 3H), 2.3 (t,  $J = 6.9$  Hz, 1H), 2.0 – 1.9 (m, 1H), 1.5 – 1.5 (m, 1H), 1.4 (s, 9H).  $^{13}C$  NMR (126 MHz, Chloroform-*d*)  $\delta$  174.3, 155.7, 153.6, 149.3, 132.6, 129.5, 129.5, 129.1, 129.0, 121.9, 121.8, 120.2, 117.8, 115.9, 113.5, 113.4, 113.4,

112.3, 112.3, 55.5, 55.5, 54.0, 51.3, 51.3, 50.8, 49.9 (d,  $J = 26.8$  Hz), 44.4, 38.2, 37.6, 27.7, 23.5.  $^{19}\text{F}$  NMR (471 MHz, Chloroform- $d$ )  $\delta$  -112.8.

IR(KBr,  $\text{cm}^{-1}$ ): 2718, 1604, 1509, 1362, 1203, 1047, 943, 809, 691.

HRMS(ESI): calcd for  $\text{C}_{31}\text{H}_{39}\text{FN}_3\text{O}^+$   $[\text{M} + \text{H}]^+$ : 488.3072; found: 488.3066.

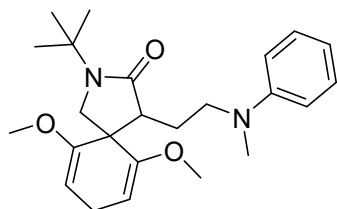

2-(tert-butyl)-6,10-dimethoxy-4-(2-(methyl(phenyl)amino)ethyl)-2-azaspiro[4.5]deca-6,9-dien-3-one (3-9)

Brown oil, 60 mg, 50% yield.

NMR:  $^1\text{H}$  NMR (400 MHz, Chloroform- $d$ )  $\delta$  7.16 (t,  $J = 8.0$  Hz, 2H), 6.69 – 6.58 (m, 3H), 4.86 – 4.78 (m, 2H), 3.69 (d,  $J = 9.5$  Hz, 1H), 3.55 (s, 3H), 3.46 (s, 3H), 3.45 – 3.32 (m, 1H), 3.28 (d,  $J = 9.5$  Hz, 1H), 3.24 – 3.11 (m, 1H), 2.92 – 2.87 (m, 3H), 2.86 (s, 3H), 2.06 – 1.95 (m, 1H), 1.55 – 1.42 (m, 1H), 1.38 (s, 9H).  $^{13}\text{C}$  NMR (101 MHz, Chloroform- $d$ )  $\delta$  174.8, 155.2, 152.6, 149.4, 128.9, 115.6, 112.1, 93.8, 92.0, 54.6, 53.9, 52.1, 51.3, 46.1, 45.6, 37.6, 27.5, 24.1, 23.0.

IR(KBr,  $\text{cm}^{-1}$ ): 2717, 1601, 1506, 1413, 1265, 1161, 991, 742, 612.

HRMS(ESI): calcd for  $\text{C}_{24}\text{H}_{35}\text{N}_2\text{O}_3^+$   $[\text{M} + \text{H}]^+$ : 399.2642; found: 399.2638.

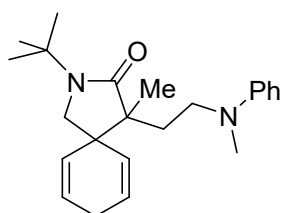

2-(tert-butyl)-4-methyl-4-(2-(methyl(phenyl)amino)ethyl)-2-azaspiro[4.5]deca-6,9-dien-3-one (3-10)

brown oil, 70 mg, 67% yield.

NMR:  $^1\text{H}$  NMR (400 MHz, Chloroform- $d$ )  $\delta$  7.19 (t,  $J = 7.8$  Hz, 2H), 6.69 – 6.62 (m, 3H), 5.91 (t,  $J = 10.0$  Hz, 2H), 5.68 (d,  $J = 10.3$  Hz, 1H), 5.62 (d,  $J = 10.1$  Hz, 1H), 3.53 – 3.42 (m, 1H), 3.38 – 3.27 (m, 1H), 3.21 (s, 2H), 2.87 (s, 3H), 2.72 (s, 2H), 1.84 – 1.73 (m, 1H), 1.64 – 1.55 (m, 1H), 1.41 (s, 9H), 1.09 (s, 3H).  $^{13}\text{C}$  NMR (101 MHz, Chloroform- $d$ )  $\delta$  177.8, 149.0, 129.0, 127.7, 126.3, 126.1, 115.6, 111.9, 54.8, 53.6, 50.6, 47.7, 43.1, 37.6, 29.1, 27.5, 26.8, 16.2.

IR(KBr,  $\text{cm}^{-1}$ ): 2719, 1600, 1509, 1392, 1058, 948, 816, 694.

HRMS(ESI): calcd for  $C_{23}H_{33}N_2O^+$   $[M + H]^+$ : 353.2587; found: 353.2582.

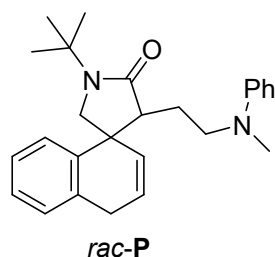

2-(tert-butyl)-4-(2-(methyl(phenyl)amino)ethyl)-2-azaspiro[4.5]deca-6,9-dien-3-one (**3-11**)

Brown yellow oil, 40 mg (**P1**, small polarity), 35% yield and 41 mg (**P2**, big polarity), 35% yield, d.r. = 1:1.

NMR:

**[P1]**  $^1H$  NMR (500 MHz, Chloroform-*d*)  $\delta$  7.45 (d,  $J = 7.7$  Hz, 1H), 7.24 – 7.13 (m, 3H), 7.11 (dd,  $J = 9.0, 7.2$  Hz, 2H), 6.60 (t,  $J = 7.2$  Hz, 1H), 6.52 (d,  $J = 8.1$  Hz, 2H), 6.10 – 6.03 (m, 1H), 5.80 – 5.74 (m, 1H), 3.75 (d,  $J = 9.9$  Hz, 1H), 3.48 (t,  $J = 3.1$  Hz, 2H), 3.38 (d,  $J = 9.9$  Hz, 1H), 3.10 – 2.97 (m, 2H), 2.83 (t,  $J = 6.7$  Hz, 1H), 2.69 (s, 3H), 2.03 – 1.94 (m, 1H), 1.56 – 1.50 (m, 1H), 1.42 (s, 9H).  $^{13}C$  NMR (126 MHz, Chloroform-*d*)  $\delta$  174.3, 149.3, 137.0, 134.6, 128.9, 128.8, 127.6, 126.7, 126.6, 126.1, 124.9, 115.8, 112.1, 59.1, 54.0, 53.2, 51.0, 43.6, 37.4, 29.8, 27.7, 23.5.

**[P2]**  $^1H$  NMR (500 MHz, Chloroform-*d*)  $\delta$  7.38 (d,  $J = 8.1$  Hz, 1H), 7.25 (dd,  $J = 6.7, 1.2$  Hz, 1H), 7.22 – 7.18 (m, 2H), 7.09 – 7.04 (m, 2H), 6.58 (t,  $J = 7.2$  Hz, 1H), 6.33 (d,  $J = 8.2$  Hz, 2H), 6.03 – 5.97 (m, 1H), 5.69 – 5.65 (m, 1H), 3.63 (d,  $J = 10.2$  Hz, 1H), 3.53 (d,  $J = 10.2$  Hz, 1H), 3.45 (t,  $J = 3.1$  Hz, 2H), 3.28 – 3.21 (m, 1H), 3.19 – 3.12 (m, 1H), 2.73 (s, 3H), 2.51 (dd,  $J = 7.9, 6.1$  Hz, 1H), 1.86 – 1.78 (m, 1H), 1.46 (s, 9H), 1.39 – 1.32 (m, 1H).  $^{13}C$  NMR (126 MHz, Chloroform-*d*)  $\delta$  175.4, 149.2, 137.8, 133.5, 132.8, 128.9, 128.8, 127.0, 126.9, 125.9, 125.0, 115.6, 111.9, 59.2, 54.3, 53.4, 50.9, 42.3, 37.5, 29.8, 27.6, 23.7.

IR(KBr,  $cm^{-1}$ ):

**[P1]** 2719, 1681, 1599, 1456, 1396, 1268, 1194, 1035, 951, 753, 694.

**[P2]** 2720, 1593, 1504, 1363, 1298, 1223, 1155, 1035, 990, 750, 696.

HRMS(ESI): calcd for  $C_{26}H_{33}N_2O^+$   $[M + H]^+$ : 389.2587; found: 389.2581.

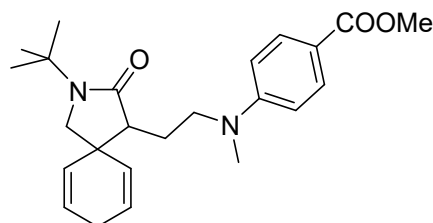



methyl 4-((2-(2-(tert-butyl)-3-oxo-2-azaspiro[4.5]deca-6,9-dien-4-yl)ethyl)(methyl)amino)benzoate (**3-12**)

Brown oil, 82 mg, 59% yielded.

NMR: <sup>1</sup>H NMR (400 MHz, Chloroform-*d*) δ 7.83 (d, *J* = 8.9 Hz, 2H), 6.61 (d, *J* = 9.0 Hz, 2H), 5.94 – 5.84 (m, 2H), 5.66 – 5.59 (m, 1H), 5.53 – 5.47 (m, 1H), 3.82 (s, 3H), 3.54 – 3.37 (m, 2H), 3.26 – 3.15 (m, 2H), 2.95 (s, 3H), 2.70 (s, 2H), 2.11 (t, *J* = 6.8 Hz, 1H), 1.93 – 1.83 (m, 1H), 1.59 – 1.49 (m, 1H), 1.37 (s, 9H). <sup>13</sup>C NMR (101 MHz, Chloroform-*d*) δ 174.5, 167.4, 152.3, 131.2, 129.9, 127.0, 127.0, 125.8, 116.3, 110.4, 56.6, 53.9, 51.3, 51.3, 50.7, 41.4, 37.7, 27.6, 26.6, 23.2.

IR(KBr, cm<sup>-1</sup>): 2711, 1674, 1529, 1470, 1366, 1227, 1111, 974, 768, 592.

HRMS(ESI): calcd for C<sub>24</sub>H<sub>33</sub>N<sub>2</sub>O<sub>3</sub><sup>+</sup> [M + H]<sup>+</sup>: 397.2486; found: 397.2482.

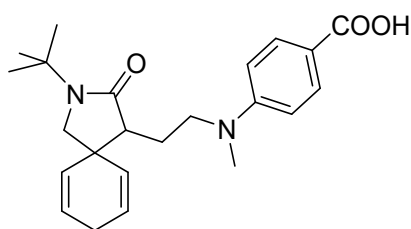

4-((2-(2-(tert-butyl)-3-oxo-2-azaspiro[4.5]deca-6,9-dien-4-yl)ethyl)(methyl)amino)benzoic acid (**3-13**)

Brown oil, 75 mg, 66% yield.

NMR: <sup>1</sup>H NMR (400 MHz, Chloroform-*d*) δ 7.90 (d, *J* = 8.8 Hz, 2H), 6.63 (d, *J* = 8.8 Hz, 2H), 5.90 (t, *J* = 7.9 Hz, 2H), 5.63 (d, *J* = 10.3 Hz, 1H), 5.51 (d, *J* = 9.1 Hz, 1H), 3.53 – 3.38 (m, 2H), 3.25 (d, *J* = 9.8 Hz, 1H), 3.18 (d, *J* = 9.8 Hz, 1H), 2.97 (s, 3H), 2.71 (s, 2H), 2.14 (t, *J* = 6.7 Hz, 1H), 1.97 – 1.84 (m, 1H), 1.61 – 1.51 (m, 1H), 1.38 (s, 9H). <sup>13</sup>C NMR (101 MHz, Chloroform-*d*) δ 174.6, 172.1, 152.8, 131.9, 129.9, 127.0, 126.9, 125.9, 115.5, 110.4, 56.6, 53.9, 51.3, 50.7, 41.4, 37.7, 27.6, 26.6, 23.2.

IR(KBr, cm<sup>-1</sup>): 2702, 1670, 1532, 1389, 1184, 945, 831, 739, 561.

HRMS(ESI): calcd for C<sub>23</sub>H<sub>31</sub>N<sub>2</sub>O<sub>3</sub><sup>+</sup> [M + H]<sup>+</sup>: 383.2329; found: 383.2324.

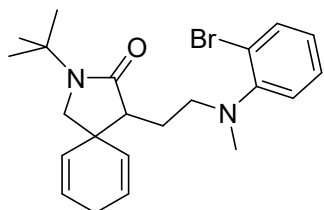

4-(2-((2-bromophenyl)(methyl)amino)ethyl)-2-(tert-butyl)-2-azaspiro[4.5]deca-6,9-dien-3-one (**3-14**)

Brown oil, 83 mg, 67% yield.

NMR:  $^1\text{H}$  NMR (500 MHz, Chloroform-*d*)  $\delta$  7.50 (dd,  $J = 7.9, 1.4$  Hz, 1H), 7.21 – 7.17 (m, 1H), 7.04 (dd,  $J = 8.0, 1.3$  Hz, 1H), 6.86 – 6.82 (m, 1H), 5.81 – 5.76 (m, 1H), 5.66 – 5.61 (m, 1H), 5.57 (dd,  $J = 10.3, 1.9$  Hz, 1H), 5.48 (dd,  $J = 10.1, 2.0$  Hz, 1H), 3.20 (d,  $J = 9.8$  Hz, 1H), 3.12 (d,  $J = 9.7$  Hz, 1H), 3.11 – 3.00 (m, 2H), 2.70 (s, 3H), 2.63 – 2.53 (m, 2H), 2.37 (dd,  $J = 7.9, 5.8$  Hz, 1H), 2.00 – 1.92 (m, 1H), 1.51 – 1.44 (m, 1H), 1.36 (s, 9H).  $^{13}\text{C}$  NMR (126 MHz, Chloroform-*d*)  $\delta$  175.2, 151.2, 133.6, 130.3, 127.8, 127.0, 126.0, 125.5, 123.8, 122.2, 120.4, 56.6, 53.7, 53.3, 50.8, 41.4, 41.3, 27.7, 26.6, 23.6.

IR(KBr,  $\text{cm}^{-1}$ ): 2724, 1597, 1473, 1361, 1117, 1028, 917, 764, 567.

HRMS(ESI): calcd for  $\text{C}_{22}\text{H}_{30}\text{BrN}_2\text{O}^+$   $[\text{M} + \text{H}]^+$ : 417.1536; found: 417.1530.

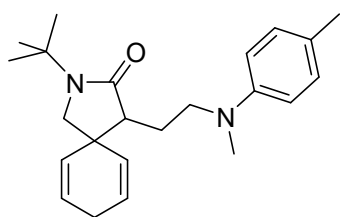

2-(tert-butyl)-4-(2-(methyl(p-tolyl)amino)ethyl)-2-azaspiro[4.5]deca-6,9-dien-3-one (**3-15**)

Brown oil, 72 mg, 69% yield.

NMR:  $^1\text{H}$  NMR (400 MHz, Chloroform-*d*)  $\delta$  7.00 (d,  $J = 8.4$  Hz, 2H), 6.64 (d,  $J = 8.8$  Hz, 2H), 5.93 – 5.85 (m, 2H), 5.67 – 5.61 (m, 1H), 5.55 – 5.49 (m, 1H), 3.47 – 3.38 (m, 1H), 3.37 – 3.28 (m, 1H), 3.26 – 3.16 (m, 2H), 2.85 (s, 3H), 2.76 – 2.68 (m, 2H), 2.24 (s, 3H), 2.17 (t,  $J = 6.8$  Hz, 1H), 1.94 – 1.86 (m, 1H), 1.60 – 1.49 (m, 1H), 1.39 (s, 9H).  $^{13}\text{C}$  NMR (101 MHz, Chloroform-*d*)  $\delta$  174.9, 147.4, 130.2, 129.5, 127.2, 126.7, 125.6, 125.0, 112.5, 56.6, 53.8, 51.4, 51.4, 41.4, 37.7, 27.6, 26.6, 23.0, 20.1.

IR(KBr,  $\text{cm}^{-1}$ ): 2811, 1683, 1611, 1521, 1362, 1224, 775.

HRMS(ESI): calcd for  $\text{C}_{23}\text{H}_{33}\text{N}_2\text{O}^+$   $[\text{M} + \text{H}]^+$ : 353.2587; found: 353.2583.

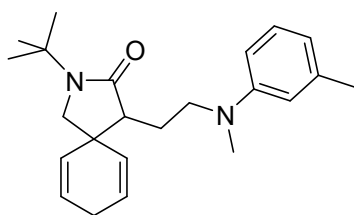

2-(tert-butyl)-4-(2-(methyl(m-tolyl)amino)ethyl)-2-azaspiro[4.5]deca-6,9-dien-3-one (**3-16**)

Brown oil, 73 mg, 70% yield.

NMR:  $^1\text{H}$  NMR (400 MHz, Chloroform-*d*)  $\delta$  7.12 – 7.04 (m, 1H), 6.56 – 6.49 (m, 2H), 6.48 (d,  $J = 8.1$  Hz, 1H), 5.95 – 5.84 (m, 2H), 5.70 – 5.61 (m, 1H), 5.57 – 5.49 (m, 1H), 3.53 – 3.41 (m, 1H), 3.38 – 3.26 (m, 1H), 3.28 – 3.15 (m, 2H), 2.88 (s, 3H), 2.76 – 2.69 (m,  $J = 2.0$  Hz, 2H), 2.29 (s, 3H), 2.17 (t,  $J$

= 6.8 Hz, 1H), 1.96 – 1.86 (m, 1H), 1.62 – 1.51 (m, 1H), 1.39 (s, 9H). <sup>13</sup>C NMR (101 MHz, Chloroform-*d*) δ 174.9, 149.5, 138.6, 130.2, 128.8, 127.2, 126.7, 125.6, 116.7, 112.9, 109.4, 56.6, 53.8, 51.4, 51.1, 41.4, 37.6, 27.7, 26.6, 23.2, 21.8.

IR(KBr, cm<sup>-1</sup>): 2782, 1682, 1600, 1500, 1356, 1225, 1086, 769.

HRMS(ESI): calcd for C<sub>23</sub>H<sub>33</sub>N<sub>2</sub>O<sup>+</sup> [M + H]<sup>+</sup>: 353.2587; found: 353.2583.

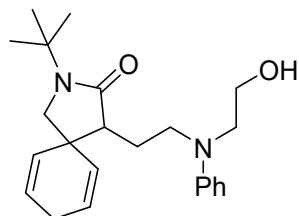

2-(tert-butyl)-4-(2-((2-hydroxyethyl)(phenyl)amino)ethyl)-2-azaspiro[4.5]deca-6,9-dien-3-one (**3-17**)

Brown oil, 75 mg, 68% yield.

NMR: <sup>1</sup>H NMR (400 MHz, Chloroform-*d*) δ 7.22 – 7.17 (m, 2H), 6.77 (d, *J* = 8.3 Hz, 2H), 6.67 (t, *J* = 7.3 Hz, 1H), 5.95 – 5.86 (m, 2H), 5.68 – 5.62 (m, 1H), 5.57 – 5.50 (m, 1H), 3.77 (t, *J* = 6.1 Hz, 2H), 3.53 – 3.40 (m, 4H), 3.30 – 3.17 (m, 2H), 2.77 – 2.68 (m, 2H), 2.17 (t, *J* = 6.7 Hz, 1H), 1.97 – 1.86 (m, 1H), 1.65 – 1.55 (m, 1H), 1.41 (s, 9H). <sup>13</sup>C NMR (101 MHz, Chloroform-*d*) δ 174.8, 148.3, 129.9, 129.0, 127.0, 126.9, 125.7, 116.1, 112.4, 59.9, 56.6, 53.8, 52.7, 51.6, 49.9, 41.4, 27.6, 26.5, 23.4.

IR(KBr, cm<sup>-1</sup>): 2832, 1664, 1598, 1506, 1361, 1226, 775.

HRMS(ESI): calcd for C<sub>23</sub>H<sub>33</sub>N<sub>2</sub>O<sub>2</sub><sup>+</sup> [M + H]<sup>+</sup>: 369.2537; found: 369.2534.

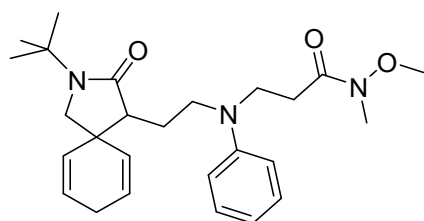

3-((2-(2-(tert-butyl)-3-oxo-2-azaspiro[4.5]deca-6,9-dien-4-yl)ethyl)(phenyl)amino)-N-methoxy-N-methylpropanamide (**3-18**)

Brown oil, 81 mg, 62% yield.

NMR: <sup>1</sup>H NMR (400 MHz, Chloroform-*d*) δ 7.17 (t, *J* = 7.8 Hz, 2H), 6.72 (d, *J* = 8.2 Hz, 2H), 6.62 (t, *J* = 7.1 Hz, 1H), 5.92 – 5.84 (m, 2H), 5.63 (d, *J* = 10.1 Hz, 1H), 5.51 (d, *J* = 8.7 Hz, 1H), 3.66 – 3.56 (m, 5H), 3.54 – 3.42 (m, 1H), 3.43 – 3.31 (m, 1H), 3.27 – 3.16 (m, 2H), 3.16 (s, 3H), 2.73 – 2.63 (m, 4H), 2.15 (t, *J* = 6.7 Hz, 1H), 1.97 – 1.83 (m, 1H), 1.60 – 1.51 (m, 1H), 1.38 (s, 9H). <sup>13</sup>C NMR (101 MHz, Chloroform-*d*) δ 174.7, 147.4, 130.0, 129.1, 127.0, 126.8, 125.6, 115.5, 111.8, 61.2, 56.5, 53.7, 51.5, 49.3, 45.9, 41.4, 27.6, 26.5, 23.9.

IR(KBr,  $\text{cm}^{-1}$ ): 2710, 1620, 1502, 1359, 1214, 1043, 992, 872, 744, 569.

HRMS(ESI): calcd for  $\text{C}_{26}\text{H}_{38}\text{N}_3\text{O}_3^+$   $[\text{M} + \text{H}]^+$ : 440.2908; found: 440.2904.

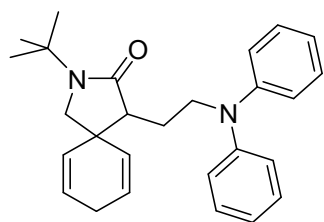

2-(tert-butyl)-4-(2-(diphenylamino)ethyl)-2-azaspiro[4.5]deca-6,9-dien-3-one (**3-19**)

Brown oil, 72 mg, 60% yield.

NMR:  $^1\text{H}$  NMR (400 MHz, Chloroform-*d*)  $\delta$  7.22 (t,  $J = 7.7$  Hz, 4H), 6.98 (d,  $J = 7.8$  Hz, 4H), 6.90 (t,  $J = 7.2$  Hz, 2H), 5.85 (dd,  $J = 18.5, 10.2$  Hz, 2H), 5.64 (d,  $J = 10.1$  Hz, 1H), 5.48 (d,  $J = 9.4$  Hz, 1H), 3.88 – 3.73 (m, 2H), 3.26 – 3.14 (m, 2H), 2.66 (s, 2H), 2.20 (t,  $J = 6.8$  Hz, 1H), 2.09 – 1.98 (m, 1H), 1.73 – 1.61 (m, 1H), 1.38 (s, 9H).  $^{13}\text{C}$  NMR (101 MHz, Chloroform-*d*)  $\delta$  174.7, 147.8, 130.2, 129.2, 127.2, 126.8, 125.8, 121.0, 120.9, 56.7, 53.9, 51.7, 50.6, 41.4, 27.7, 26.6, 24.2.

IR(KBr,  $\text{cm}^{-1}$ ): 2720, 1681, 1594, 1494, 1392, 1244, 1067, 988, 878, 696.

HRMS(ESI): calcd for  $\text{C}_{27}\text{H}_{33}\text{N}_2\text{O}^+$   $[\text{M} + \text{H}]^+$ : 401.2587; found: 401.2582.

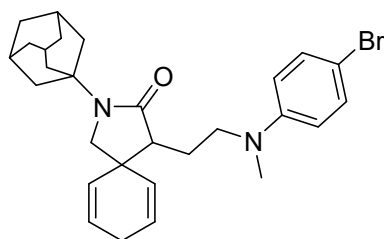

2-(adamantan-1-yl)-4-(2-((4-bromophenyl)(methyl)amino)ethyl)-2-azaspiro[4.5]deca-6,9-dien-3-one (**3-20**)

Brown oil, 97 mg, 66% yield.

NMR:  $^1\text{H}$  NMR (400 MHz, Chloroform-*d*)  $\delta$  7.23 (d,  $J = 9.1$  Hz, 2H), 6.56 (d,  $J = 9.1$  Hz, 2H), 5.92 – 5.83 (m, 2H), 5.67 – 5.60 (m, 1H), 5.53 – 5.45 (m, 1H), 3.39 (dd,  $J = 9.3, 6.7$  Hz, 2H), 3.21 (s, 2H), 2.85 (s, 3H), 2.69 (d,  $J = 5.5$  Hz, 2H), 2.09 (d,  $J = 9.6$  Hz, 10H), 1.89 – 1.76 (m, 1H), 1.70 (d,  $J = 13.8$  Hz, 7H), 1.56 – 1.42 (m, 1H).  $^{13}\text{C}$  NMR (101 MHz, Chloroform-*d*)  $\delta$  174.7, 148.3, 131.6, 130.0, 127.2, 126.9, 125.6, 113.7, 107.5, 55.5, 55.1, 51.6, 51.1, 41.6, 39.7, 37.7, 36.3, 29.6, 26.7, 22.9.

IR(KBr,  $\text{cm}^{-1}$ ): 2710, 1670, 1594, 1455, 1345, 1196, 923, 802, 578.

HRMS(ESI): calcd for  $\text{C}_{28}\text{H}_{36}\text{BrN}_2\text{O}^+$   $[\text{M} + \text{H}]^+$ : 495.2006; found: 495.2001.

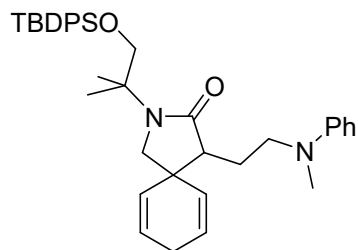

2-(1-((tert-butyl)diphenylsilyloxy)-2-methylpropan-2-yl)-4-(2-(methyl(phenyl)amino)ethyl)-2-azaspiro[4.5]deca-6,9-dien-3-one (**3-21**)

Brown oil, 100 mg, 60% yield.

NMR:  $^1\text{H}$  NMR (500 MHz, Chloroform-*d*)  $\delta$  7.69 (d,  $J = 7.3$  Hz, 4H), 7.46 – 7.39 (m, 6H), 7.22 (t,  $J = 7.6$  Hz, 2H), 6.75 (d,  $J = 8.2$  Hz, 2H), 6.68 (t,  $J = 7.2$  Hz, 1H), 5.93 – 5.84 (m, 2H), 5.76 (d,  $J = 10.2$  Hz, 1H), 5.53 (d,  $J = 9.9$  Hz, 1H), 3.99 (d,  $J = 10.0$  Hz, 1H), 3.81 (d,  $J = 10.0$  Hz, 1H), 3.46 (t,  $J = 8.0$  Hz, 2H), 3.40 (d,  $J = 9.6$  Hz, 1H), 3.34 (d,  $J = 9.6$  Hz, 1H), 2.93 (s, 3H), 2.74 (s, 2H), 2.16 (t,  $J = 6.7$  Hz, 1H), 1.99 – 1.90 (m, 1H), 1.64 – 1.55 (m, 1H), 1.39 (s, 6H), 1.12 (s, 9H).  $^{13}\text{C}$  NMR (126 MHz, Chloroform-*d*)  $\delta$  174.9, 149.3, 135.6, 133.4, 130.2, 129.6, 129.0, 127.6, 127.5, 126.8, 125.3, 115.7, 112.1, 68.5, 57.8, 57.6, 51.4, 51.1, 41.7, 37.7, 26.9, 26.6, 23.4, 23.1, 19.3.

IR(KBr,  $\text{cm}^{-1}$ ): 2715, 1602, 1504, 1392, 1194, 994, 817, 612.

HRMS(ESI): calcd for  $\text{C}_{38}\text{H}_{49}\text{N}_2\text{O}_2\text{Si}^+ [\text{M} + \text{H}]^+$ : 593.3558; found: 593.3550.

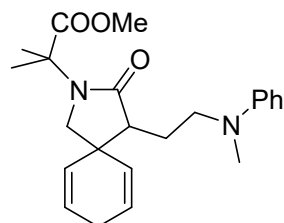

methyl 2-methyl-2-(4-(2-(methyl(phenyl)amino)ethyl)-3-oxo-2-azaspiro[4.5]deca-6,9-dien-2-yl)propanoate (**3-22**)

Brown oil, 41 mg, 36% yield.

NMR:  $^1\text{H}$  NMR (500 MHz, Chloroform-*d*)  $\delta$  7.18 (t,  $J = 7.6$  Hz, 2H), 6.69 (d,  $J = 7.7$  Hz, 2H), 6.65 (t,  $J = 7.0$  Hz, 1H), 5.91 (dd,  $J = 9.1, 3.3$  Hz, 2H), 5.70 (d,  $J = 10.3$  Hz, 1H), 5.57 (d,  $J = 10.0$  Hz, 1H), 3.74 (s, 3H), 3.52 – 3.44 (m, 1H), 3.38 (dd,  $J = 10.4, 4.4$  Hz, 1H), 3.33 (d,  $J = 9.2$  Hz, 1H), 3.20 (d,  $J = 9.4$  Hz, 1H), 2.87 (s, 3H), 2.73 (s, 2H), 2.23 (t,  $J = 6.9$  Hz, 1H), 1.92 – 1.83 (m, 1H), 1.61 – 1.54 (m, 1H), 1.49 (s, 3H), 1.45 (s, 3H).  $^{13}\text{C}$  NMR (126 MHz, Chloroform-*d*)  $\delta$  174.7, 174.4, 149.4, 129.7, 129.0, 127.1, 127.0, 125.8, 115.8, 112.2, 58.1, 55.7, 52.4, 50.9, 50.2, 42.3, 37.6, 26.6, 23.9, 23.4, 22.9.

IR(KBr,  $\text{cm}^{-1}$ ): 2718, 1613, 1508, 1362, 1199, 947, 850, 696.

HRMS(ESI): calcd for  $\text{C}_{23}\text{H}_{31}\text{N}_2\text{O}_3^+ [\text{M} + \text{H}]^+$ : 383.2329; found: 383.2323.

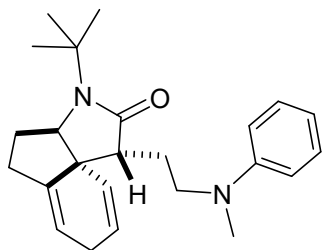

3-(tert-butyl)-1-(2-(methyl(phenyl)amino)ethyl)-3a,4,5,7-tetrahydro-1H-indeno[1,7a-b]pyrrol-2(3H)-one (**3-23**)

Brown oil, 75mg, 69 % yield (d.r. > 20:1).

NMR:  $^1\text{H}$  NMR (400 MHz, Chloroform-*d*)  $\delta$  7.23 – 7.14 (m, 2H), 6.70 (d,  $J = 8.2$  Hz, 2H), 6.65 (t,  $J = 7.2$  Hz, 1H), 6.01 – 5.95 (m, 1H), 5.71 (d,  $J = 9.9$  Hz, 1H), 5.59 (s, 1H), 3.64 (dd,  $J = 9.1, 4.4$  Hz, 1H), 3.38 – 3.21 (m, 2H), 2.87 (s, 3H), 2.76 – 2.70 (m, 2H), 2.73 – 2.64 (m, 2H), 2.47 (dd,  $J = 8.1, 5.8$  Hz, 1H), 2.35 (dd,  $J = 14.6, 9.8$  Hz, 1H), 2.08 – 1.91 (m, 2H), 1.80 – 1.74 (m, 1H), 1.50 (dd,  $J = 16.1, 7.3$  Hz, 2H), 1.41 (s, 9H).  $^{13}\text{C}$  NMR (101 MHz, Chloroform-*d*)  $\delta$  174.7, 149.4, 140.7, 128.9, 126.7, 126.4, 117.7, 115.8, 112.2, 65.8, 53.8, 51.2, 50.4, 47.3, 37.7, 31.0, 30.0, 28.2, 27.4, 23.9.

KR(KBr,  $\text{cm}^{-1}$ ): 2718, 1601, 1505, 1362, 1221, 1118, 948, 693.

HRMS(ESI): calcd for  $\text{C}_{24}\text{H}_{33}\text{N}_2\text{O}^+$  [ $\text{M} + \text{H}$ ] $^+$ : 365.2587; found: 365.2583.

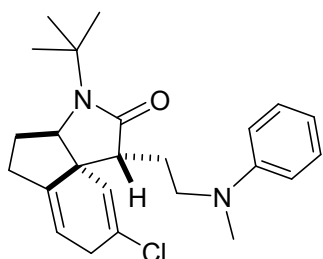

3-(tert-butyl)-8-chloro-1-(2-(methyl(phenyl)amino)ethyl)-3a,4,5,7-tetrahydro-1H-indeno[1,7a-b]pyrrol-2(3H)-one (**3-24**)

Brown oil, 75 mg, 63 % yield (d.r. = 2.33:1).

NMR:  $^1\text{H}$  NMR (400 MHz, Chloroform-*d*)  $\delta$  7.25 – 7.17 (m, 2H), 6.69 (d,  $J = 8.4$  Hz, 3H), 6.65 (d,  $J = 7.2$  Hz, 2H), 5.82 (d,  $J = 1.7$  Hz, 1H), 5.54 – 5.48 (m, 1H), 3.70 (dd,  $J = 9.2, 4.4$  Hz, 1H), 3.37 – 3.21 (m, 2H), 3.15 – 3.10 (m, 0.3H), 3.10 – 3.05 (m, 0.7H), 2.98 – 2.92 (m, 0.7H), 2.93 – 2.88 (m, 0.3H), 2.88 (s, 3H), 2.73 – 2.61 (m, 1H), 2.50 (dd,  $J = 8.7, 5.4$  Hz, 1H), 2.39 – 2.29 (m, 1H), 2.13 – 1.95 (m, 2H), 1.85 – 1.72 (m, 1H), 1.63 – 1.50 (m, 1H), 1.41 (s, 9H).  $^{13}\text{C}$  NMR (101 MHz, Chloroform-*d*)  $\delta$  173.9, 149.3, 140.4, 132.3, 129.1, 123.9, 116.8, 116.0, 112.3, 65.2, 54.0, 53.7, 51.1, 47.4, 37.7, 34.7, 31.6, 29.5, 28.2, 24.0.

KR(KBr,  $\text{cm}^{-1}$ ): 2718, 1601, 1505, 1362, 1221, 1118, 948, 756, 693.

HRMS(ESI): calcd for  $C_{24}H_{32}ClN_2O^+$   $[M + H]^+$ : 399.2198; found: 399.2193.

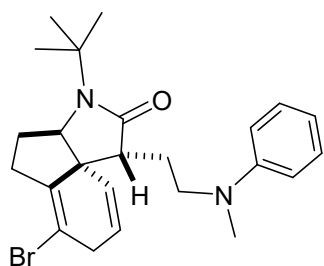

6-bromo-3-(tert-butyl)-1-(2-(methyl(phenyl)amino)ethyl)-3a,4,5,7-tetrahydro-1H-indeno[1,7a-b]pyrrol-2(3H)-one (**3-25**)

Brown oil, 96 mg, 73 % yield (d.r. > 20:1).

NMR:  $^1H$  NMR (500 MHz, Chloroform-*d*)  $\delta$  7.21 (t,  $J = 7.8$  Hz, 2H), 6.71 (d,  $J = 8.1$  Hz, 2H), 6.67 (t,  $J = 7.1$  Hz, 1H), 5.87 – 5.79 (m, 1H), 5.68 (d,  $J = 9.7$  Hz, 1H), 3.71 (dd,  $J = 8.8, 5.8$  Hz, 1H), 3.46 – 3.36 (m, 1H), 3.32 – 3.22 (m, 1H), 3.18 (d,  $J = 22.2$  Hz, 1H), 3.11 – 3.03 (m, 1H), 2.87 (s, 3H), 2.71 – 2.61 (m, 2H), 2.49 (t,  $J = 6.7$  Hz, 1H), 2.21 – 2.09 (m, 1H), 1.99 – 1.88 (m, 1H), 1.87 – 1.77 (m, 1H), 1.53 – 1.45 (m, 1H), 1.41 (s, 9H).  $^{13}C$  NMR (126 MHz, Chloroform-*d*)  $\delta$  174.0, 149.4, 139.4, 129.1, 126.2, 126.2, 116.1, 114.0, 112.4, 65.2, 55.1, 53.9, 51.1, 47.5, 37.7, 37.5, 30.7, 30.2, 28.2, 23.7.

IR(KBr,  $cm^{-1}$ ): 2718, 1678, 1605, 1506, 1362, 1222, 1039, 749, 645.

HRMS(ESI): calcd for  $C_{24}H_{32}BrN_2O^+$   $[M + H]^+$ : 443.1693; found: 443.1688.

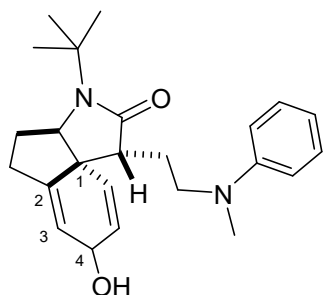

3-(tert-butyl)-7-hydroxy-1-(2-(methyl(phenyl)amino)ethyl)-3a,4,5,7-tetrahydro-1H-indeno[1,7a-b]pyrrol-2(3H)-one (**3-26**)

Brown oil, 67 mg, 59 % yield (From 4-F) (d.r. > 20:1); 78 mg, 68 % yield (From 4-Br) (d.r. > 20:1)

NMR:  $^1H$  NMR (500 MHz, Chloroform-*d*)  $\delta$  7.18 (t,  $J = 7.4$  Hz, 2H), 6.73 (d,  $J = 8.0$  Hz, 2H), 6.65 (t,  $J = 6.9$  Hz, 1H), 6.01 (dd,  $J = 9.9, 4.4$  Hz, 1H), 5.86 (d,  $J = 9.9$  Hz, 1H), 5.78 (s, 1H), 4.55 (t,  $J = 4.9$  Hz, 1H), 3.60 (dd,  $J = 8.7, 4.1$  Hz, 1H), 3.56 – 3.48 (m, 1H), 3.46 – 3.38 (m, 1H), 2.87 (s, 3H), 2.78 – 2.69 (m, 1H), 2.49 (t,  $J = 6.3$  Hz, 1H), 2.37 – 2.29 (m, 1H), 2.12 – 2.03 (m, 1H), 1.84 – 1.78 (m, 2H), 1.56 – 1.50 (m, 1H), 1.41 (s, 9H).  $^{13}C$  NMR (126 MHz, Chloroform-*d*)  $\delta$  174.7, 149.5, 129.1, 129.0,

129.0, 121.7, 121.6, 116.2, 116.2, 112.7, 64.4, 63.1, 63.0, 54.0, 51.4, 51.0, 51.0, 46.0, 38.2, 38.2, 31.6, 30.1, 28.3, 23.8.

IR(KBr,  $\text{cm}^{-1}$ ): 2967, 1659, 1594, 1507, 1358, 1001, 876, 692.

HRMS(ESI): calcd for  $\text{C}_{24}\text{H}_{33}\text{N}_2\text{O}_2^+$   $[\text{M} + \text{H}]^+$ : 381.2537; found: 381.2532.

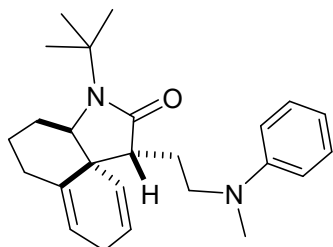

3-(tert-butyl)-1-(2-(methyl(phenyl)amino)ethyl)-3,3a,4,5,6,8-hexahydrobenzo[d]indol-2(1H)-one (**3-27**)

Brown oil, 83 mg, 73 % yield (d.r. > 20:1).

NMR:  $^1\text{H}$  NMR (400 MHz, Chloroform-*d*)  $\delta$  7.19 (t,  $J = 7.9$  Hz, 2H), 6.71 (d,  $J = 8.2$  Hz, 2H), 6.65 (t,  $J = 7.2$  Hz, 1H), 5.88 (dd,  $J = 10.1, 4.4$  Hz, 1H), 5.63 (t,  $J = 3.5$  Hz, 1H), 5.58 – 5.51 (m, 1H), 3.41 (t,  $J = 7.9$  Hz, 2H), 3.30 (dd,  $J = 10.6, 5.9$  Hz, 1H), 2.88 (s, 3H), 2.74 (d,  $J = 6.5$  Hz, 1H), 2.72 – 2.67 (m, 2H), 2.22 – 2.12 (m, 3H), 1.94 – 1.84 (m, 1H), 1.79 – 1.73 (m, 1H), 1.55 – 1.46 (m, 2H), 1.43 (s, 9H), 1.28 – 1.22 (m, 1H).  $^{13}\text{C}$  NMR (101 MHz, Chloroform-*d*)  $\delta$  174.3, 149.5, 136.5, 128.9, 128.0, 126.2, 121.9, 115.8, 112.2, 63.0, 53.7, 51.2, 45.7, 45.6, 37.6, 32.0, 31.9, 28.1, 27.1, 24.1, 23.3.

IR(KBr,  $\text{cm}^{-1}$ ): 2711, 1675, 1504, 1394, 1266, 1027, 954, 750, 698.

HRMS(ESI): calcd for  $\text{C}_{25}\text{H}_{35}\text{N}_2\text{O}^+$   $[\text{M} + \text{H}]^+$ : 379.2744; found: 379.2738

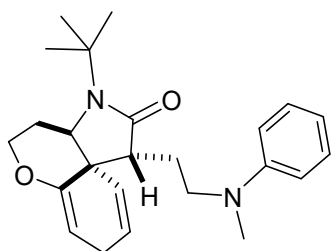

3-(tert-butyl)-1-(2-(methyl(phenyl)amino)ethyl)-3,3a,4,5-tetrahydro-8H-chromeno[4,4a-b]pyrrol-2(1H)-one (**3-28**)

White solid, 80 mg, 70 % yield (d.r. = 6.62:1).

NMR:  $^1\text{H}$  NMR (400 MHz, Chloroform-*d*)  $\delta$  7.23 – 7.15 (m, 2H), 6.72 (d,  $J = 8.1$  Hz, 2H), 6.64 (t,  $J = 7.2$  Hz, 1H), 5.92 – 5.83 (m, 1H), 5.56 – 5.48 (m, 1H), 5.47 – 5.40 (m, 1H), 4.15 – 4.06 (m, 1H), 3.60 – 3.46 (m, 3H), 3.43 – 3.30 (m, 1H), 2.89 (s, 4H), 2.86 (t,  $J = 6.6$  Hz, 5H), 2.83 – 2.68 (m, 2H), 2.09 –



1.84 (m, 4H), 1.60 – 1.48 (m, 1H), 1.44 (s, 9H). <sup>13</sup>C NMR (101 MHz, Chloroform-*d*) δ 174.3, 151.7, 149.2, 128.9, 126.6, 115.6, 112.1, 108.1, 66.7, 59.6, 53.9, 51.3, 46.0, 43.7, 37.7, 31.6, 28.1, 26.7, 23.1.

IR(KBr, cm<sup>-1</sup>): 2824, 1667, 1598, 1507, 1359, 1219, 1073, 950, 751, 690.

HRMS(ESI): calcd for C<sub>24</sub>H<sub>33</sub>N<sub>2</sub>O<sub>2</sub><sup>+</sup> [M + H]<sup>+</sup>: 381.2537; found: 381.2531

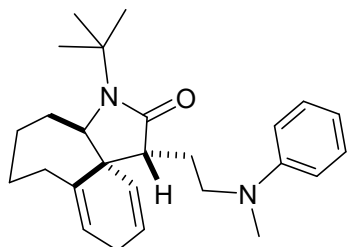

3-(tert-butyl)-1-(2-(methyl(phenyl)amino)ethyl)-3a,4,5,6,7,9-hexahydro-1H-benzo[2,3]cyclohepta[1,2-b]pyrrol-2(3H)-one (**3-29**)

Brown oil, 100 mg, 85 % yield (d.r. = 1.27:1).

NMR: <sup>1</sup>H NMR (400 MHz, Chloroform-*d*) δ 7.18 (dd, *J* = 8.7, 7.3 Hz, 2H), 6.68 (d, *J* = 8.1 Hz, 2H), 6.64 (t, *J* = 7.2 Hz, 1H), 5.88 – 5.81 (m, 1H), 5.76 – 5.69 (m, 1H), 5.61 – 5.53 (m, 1H), 3.54 – 3.42 (m, 1H), 3.36 – 3.24 (m, 1H), 3.20 (dd, *J* = 10.7, 4.2 Hz, 1H), 2.92 – 2.83 (m, 4H), 2.77 – 2.66 (m, 2H), 2.42 – 2.29 (m, 1H), 2.14 – 2.08 (m, 1H), 1.96 – 1.83 (m, 2H), 1.73 – 1.62 (m, 3H), 1.61 – 1.48 (m, 2H), 1.43 (s, 9H), 1.36 – 1.26 (m, 1H). <sup>13</sup>C NMR (101 MHz, Chloroform-*d*) δ 174.6, 149.4, 135.4, 129.5, 128.9, 125.9, 124.6, 115.7, 112.1, 69.0, 53.9, 51.0, 47.6, 45.4, 37.5, 29.4, 29.2, 28.1, 27.6, 27.3, 23.2, 20.0.

IR(KBr, cm<sup>-1</sup>): 2818, 1739, 1625, 1398, 1259, 1032, 989, 860, 752, 695.

HRMS(ESI): calcd for C<sub>26</sub>H<sub>37</sub>N<sub>2</sub>O<sup>+</sup> [M + H]<sup>+</sup>: 393.2900; found: 393.2894

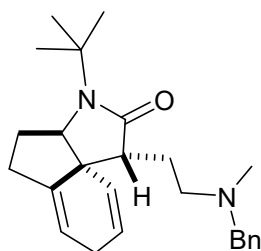

1-(2-(benzyl(methyl)amino)ethyl)-3-(tert-butyl)-3a,4,5,7-tetrahydro-1H-indeno[1,7a-b]pyrrol-2(3H)-one (**3-30**)

Brown oil, 85 mg, 75 % yield (d.r. > 20:1)

NMR: <sup>1</sup>H NMR (500 MHz, Chloroform-*d*) δ 7.30 – 7.18 (m, 5H), 5.86 – 5.80 (m, 1H), 5.62 (dd, *J* = 9.9, 2.7 Hz, 1H), 5.47 – 5.42 (m, 1H), 3.59 (dd, *J* = 9.1, 4.4 Hz, 1H), 3.47 (d, *J* = 13.0 Hz, 1H), 3.36 (d,

$J = 13.0$  Hz, 1H), 2.76 – 2.67 (m, 1H), 2.63 – 2.54 (m, 2H), 2.45 – 2.39 (m, 1H), 2.35 – 2.27 (m, 3H), 2.12 (s, 3H), 2.07 – 1.94 (m, 3H), 1.78 – 1.71 (m, 1H), 1.39 (s, 9H).  $^{13}\text{C}$  NMR (126 MHz, Chloroform-*d*)  $\delta$  175.1, 140.8, 139.3, 129.0, 128.0, 126.7, 126.4, 126.3, 117.3, 65.8, 62.1, 55.0, 53.7, 50.2, 47.0, 41.7, 30.9, 30.1, 28.2, 27.2, 24.3.

IR(KBr,  $\text{cm}^{-1}$ ): 2823, 1601, 1461, 1389, 1264, 1133, 978, 815, 649.

HRMS(ESI): calcd for  $\text{C}_{25}\text{H}_{35}\text{N}_2\text{O}^+$   $[\text{M} + \text{H}]^+$ : 379.2744; found: 379.2738

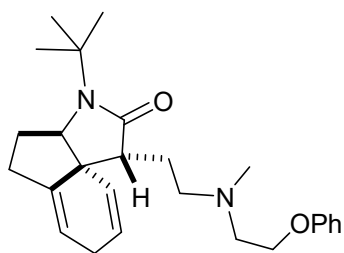

3-(tert-butyl)-1-(2-(methyl(2-phenoxyethyl)amino)ethyl)-3a,4,5,7-tetrahydro-1H-indeno[1,7a-b]pyrrol-2(3H)-one (**3-31**)

Brown oil, 86 mg, 70 % yield (d.r. > 20:1).

NMR:  $^1\text{H}$  NMR (500 MHz, Chloroform-*d*)  $\delta$  7.26 (t,  $J = 7.9$  Hz, 2H), 6.92 (t,  $J = 7.3$  Hz, 1H), 6.89 (d,  $J = 8.0$  Hz, 2H), 5.91 (d,  $J = 9.7$  Hz, 1H), 5.65 (d,  $J = 9.8$  Hz, 1H), 5.51 (s, 1H), 4.01 (t,  $J = 6.0$  Hz, 2H), 3.60 (dd,  $J = 9.1, 4.5$  Hz, 1H), 2.76 (t,  $J = 6.0$  Hz, 2H), 2.74 – 2.69 (m, 1H), 2.67 (s, 2H), 2.61 (dd,  $J = 9.0, 5.0$  Hz, 1H), 2.47 – 2.40 (m, 2H), 2.34 – 2.28 (m, 4H), 2.04 – 1.93 (m, 2H), 1.78 – 1.70 (m, 1H), 1.40 (s, 9H).  $^{13}\text{C}$  NMR (126 MHz, Chloroform-*d*)  $\delta$  175.0, 141.0, 129.3, 126.6, 126.3, 120.5, 117.4, 114.5, 65.9, 65.8, 56.1, 55.6, 53.8, 50.4, 46.9, 42.5, 30.9, 30.0, 28.3, 27.3, 24.2.

IR(KBr,  $\text{cm}^{-1}$ ): 2719, 1612, 1496, 1361, 1233, 1070, 885, 771, 691.

HRMS(ESI): calcd for  $\text{C}_{26}\text{H}_{37}\text{N}_2\text{O}_2^+$   $[\text{M} + \text{H}]^+$ : 409.2850; found: 409.2845.

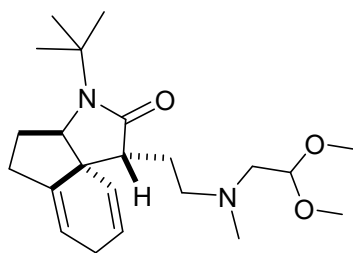

3-(tert-butyl)-1-(2-((2,2-dimethoxyethyl)(methyl)amino)ethyl)-3a,4,5,7-tetrahydro-1H-indeno[1,7a-b]pyrrol-2(3H)-one (**3-32**)

Brown oil, 77 mg, 69 % yield (d.r. > 20:1)

NMR:  $^1\text{H}$  NMR (500 MHz, Chloroform-*d*)  $\delta$  5.87 (d,  $J = 9.7$  Hz, 1H), 5.61 (d,  $J = 9.8$  Hz, 1H), 5.50 (s, 1H), 4.39 (t,  $J = 5.2$  Hz, 1H), 3.57 (dd,  $J = 9.1, 4.4$  Hz, 1H), 3.29 (s, 6H), 2.74 – 2.67 (m, 1H), 2.65 (s, 2H), 2.51 (dd,  $J = 8.9, 5.0$  Hz, 1H), 2.43 (d,  $J = 5.2$  Hz, 2H), 2.35 (t,  $J = 7.6$  Hz, 2H), 2.33 – 2.24 (m, 2H), 2.20 (s, 3H), 2.01 – 1.84 (m, 2H), 1.76 – 1.67 (m, 1H), 1.36 (s, 9H).  $^{13}\text{C}$  NMR (126 MHz, Chloroform-*d*)  $\delta$  174.9, 140.9, 126.5, 126.2, 117.4, 102.7, 65.7, 58.5, 56.2, 53.7, 53.1, 53.0, 50.3, 47.0, 42.6, 30.9, 30.0, 28.2, 27.3, 23.9.

IR(KBr,  $\text{cm}^{-1}$ ): 2832, 1603, 1470, 1361, 1209, 1070, 822, 771, 652.

HRMS(ESI): calcd for  $\text{C}_{22}\text{H}_{37}\text{N}_2\text{O}_3^+$  [ $\text{M} + \text{H}$ ] $^+$ : 377.2799; found: 377.2794.

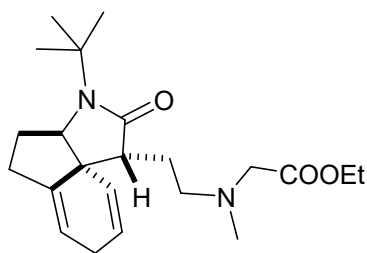

ethyl N-(2-(3-(tert-butyl)-2-oxo-2,3,3a,4,5,7-hexahydro-1H-indeno[1,7a-b]pyrrol-1-yl)ethyl)-N-methylglycinate (**3-33**)

Brown oil, 81 mg, 72 % yield (d.r. > 20:1)

NMR:  $^1\text{H}$  NMR (500 MHz, Chloroform-*d*)  $\delta$  5.91 – 5.86 (m, 1H), 5.62 (d,  $J = 9.9$  Hz, 1H), 5.51 (s, 1H), 4.12 (q,  $J = 7.1$  Hz, 2H), 3.58 (dd,  $J = 9.2, 4.5$  Hz, 1H), 3.17 (d,  $J = 3.7$  Hz, 2H), 2.77 – 2.67 (m, 1H), 2.69 – 2.64 (m, 2H), 2.56 (dd,  $J = 9.0, 5.0$  Hz, 1H), 2.52 – 2.39 (m, 2H), 2.35 – 2.26 (m, 4H), 2.05 – 1.95 (m, 1H), 1.95 – 1.85 (m, 1H), 1.78 – 1.68 (m, 1H), 1.45 – 1.32 (m, 10H), 1.23 (t,  $J = 7.1$  Hz, 3H).  $^{13}\text{C}$  NMR (126 MHz, Chloroform-*d*)  $\delta$  175.0, 171.1, 141.0, 126.5, 126.3, 117.3, 65.7, 60.2, 58.1, 54.6, 53.7, 50.3, 46.9, 41.9, 30.9, 30.0, 28.2, 27.3, 24.3, 14.2.

IR(KBr,  $\text{cm}^{-1}$ ): 2835, 1737, 1595, 1460, 1360, 1184, 1038, 769, 681, 570.

HRMS(ESI): calcd for  $\text{C}_{22}\text{H}_{35}\text{N}_2\text{O}_3^+$  [ $\text{M} + \text{H}$ ] $^+$ : 375.2642; found: 375.2638

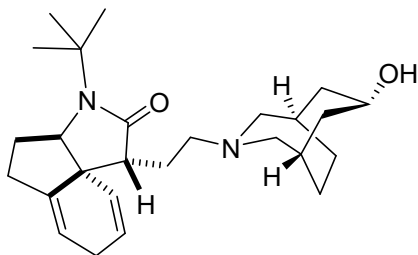

3-(tert-butyl)-1-(2-(7-hydroxy-3-azabicyclo[3.3.2]decan-3-yl)ethyl)-3a,4,5,7-tetrahydro-1H-indeno[1,7a-b]pyrrol-2(3H)-one (**3-34**)

Brown oil, 80 mg, 70 % yield (d.r. > 20:1).

NMR:  $^1\text{H}$  NMR (500 MHz, Chloroform-*d*)  $\delta$  5.87 (d,  $J = 9.7$  Hz, 1H), 5.61 (d,  $J = 9.6$  Hz, 1H), 5.50 (s, 1H), 3.96 (s, 1H), 3.56 (dd,  $J = 8.4, 3.7$  Hz, 1H), 3.11 (s, 2H), 2.72 – 2.62 (m, 4H), 2.36 – 2.23 (m, 3H), 2.09 – 1.93 (m, 6H), 1.87 – 1.79 (m, 3H), 1.79 – 1.68 (m, 2H), 1.59 (d,  $J = 14.3$  Hz, 2H), 1.35 (s, 9H).  $^{13}\text{C}$  NMR (126 MHz, Chloroform-*d*)  $\delta$  175.3, 140.7, 126.4, 126.4, 117.3, 65.7, 64.7, 58.3, 57.9, 53.7, 50.4, 49.8, 47.1, 38.9, 30.9, 30.0, 28.2, 27.3, 26.2, 26.1, 25.8.

IR(KBr,  $\text{cm}^{-1}$ ): 2831, 1594, 1357, 1073, 953, 896, 772, 693.

HRMS(ESI): calcd for  $\text{C}_{24}\text{H}_{37}\text{N}_2\text{O}_2^+$  [ $\text{M} + \text{H}$ ] $^+$ : 385.2850; found: 385.2845.

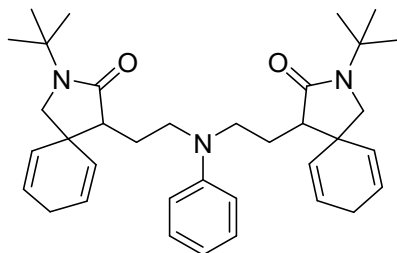

4,4'-((phenylazanediyl)bis(ethane-2,1-diyl))bis(2-(tert-butyl)-2-azaspiro[4.5]deca-6,9-dien-3-one) (**3-35**)

Brown oil, 48mg, 58 yield (d.r. = 1.44:1).

NMR:  $^1\text{H}$  NMR (500 MHz, Chloroform-*d*)  $\delta$  7.12 (q,  $J = 7.4$  Hz, 2H), 6.70 (d,  $J = 8.2$  Hz, 1.18H), 6.66 (d,  $J = 8.1$  Hz, 0.82H), 6.56 (t,  $J = 6.9$  Hz, 1H), 5.93 – 5.82 (m, 4H), 5.63 (t,  $J = 9.3$  Hz, 2H), 5.51 (d,  $J = 9.9$  Hz, 2H), 3.42 – 3.28 (m, 4H), 3.23 (d,  $J = 9.8$  Hz, 2H), 3.17 (d,  $J = 9.8$  Hz, 2H), 2.76 – 2.64 (m, 4H), 2.12 (q,  $J = 6.4$  Hz, 2H), 1.91 – 1.81 (m, 2H), 1.57 – 1.49 (m, 2H), 1.38 (s, 18H).  $^{13}\text{C}$  NMR (126 MHz, Chloroform-*d*)  $\delta$  174.8, 174.7, 148.1, 130.2, 130.0, 128.9, 128.9, 127.2, 127.1, 126.8, 126.6, 125.6, 114.8, 111.7, 111.7, 56.6, 53.7, 51.8, 51.6, 48.7, 48.7, 41.4, 41.3, 27.6, 27.6, 26.6, 23.7, 23.7.

IR(KBr,  $\text{cm}^{-1}$ ): 2814, 1615, 1463, 1264, 1037, 916, 791, 640.

HRMS(ESI): calcd for  $\text{C}_{36}\text{H}_{50}\text{N}_3\text{O}_2^+$  [ $\text{M} + \text{H}$ ] $^+$ : 556.3898; found: 556.3893

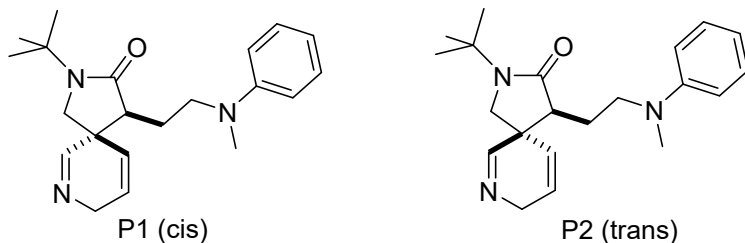

2-(tert-butyl)-4-(2-(methyl(phenyl)amino)ethyl)-2,7-diazaspiro[4.5]deca-6,9-dien-3-one (**3-36**)

Brown oil, 70 mg, 69% yield, d.r. = 1:1.

NMR:

[P1] <sup>1</sup>H NMR (400 MHz, Chloroform-*d*) δ 7.73 (q, *J* = 2.7 Hz, 1H), 7.19 (dd, *J* = 8.8, 7.2 Hz, 2H), 6.70 (d, *J* = 7.8 Hz, 2H), 6.66 (t, *J* = 7.3 Hz, 1H), 6.00 – 5.92 (m, 1H), 5.60 – 5.53 (m, 1H), 4.26 – 4.13 (m, 2H), 3.53 – 3.43 (m, 2H), 3.33 (d, *J* = 10.5 Hz, 1H), 3.23 (d, *J* = 10.4 Hz, 1H), 2.87 (s, 3H), 2.26 (dd, *J* = 7.7, 5.9 Hz, 1H), 2.00 – 1.90 (m, 1H), 1.59 – 1.49 (m, 1H), 1.41 (s, 9H). <sup>13</sup>C NMR (101 MHz, Chloroform-*d*) δ 174.0, 161.7, 149.3, 129.1, 127.6, 125.9, 116.1, 112.3, 54.2, 53.5, 50.9, 50.1, 50.0, 40.6, 37.7, 27.6, 23.3.

[P2] <sup>1</sup>H NMR (400 MHz, Chloroform-*d*) δ 7.69 (q, *J* = 2.7 Hz, 1H), 7.21 (t, *J* = 8.0 Hz, 2H), 6.73 (d, *J* = 7.9 Hz, 2H), 6.68 (t, *J* = 7.2 Hz, 1H), 6.05 – 5.97 (m, 1H), 5.78 – 5.69 (m, 1H), 4.23 (q, *J* = 2.5 Hz, 2H), 3.50 – 3.35 (m, 3H), 3.21 (d, *J* = 10.1 Hz, 1H), 2.90 (s, 3H), 2.41 (t, *J* = 6.8 Hz, 1H), 2.00 – 1.88 (m, 1H), 1.58 – 1.50 (m, 1H), 1.42 (s, 9H). <sup>13</sup>C NMR (101 MHz, Chloroform-*d*) δ 173.6, 163.4, 149.3, 129.1, 126.4, 123.7, 116.2, 112.3, 54.1, 53.6, 50.8, 50.0, 48.9, 41.2, 37.7, 27.6, 23.3.

IR(KBr, cm<sup>-1</sup>): 1684, 1600, 1506, 1403, 1364, 1225, 945, 749.

HRMS(ESI): calcd for C<sub>21</sub>H<sub>30</sub>N<sub>3</sub>O<sup>+</sup> [M + H]<sup>+</sup>: 340.2383; found: 340.2378.

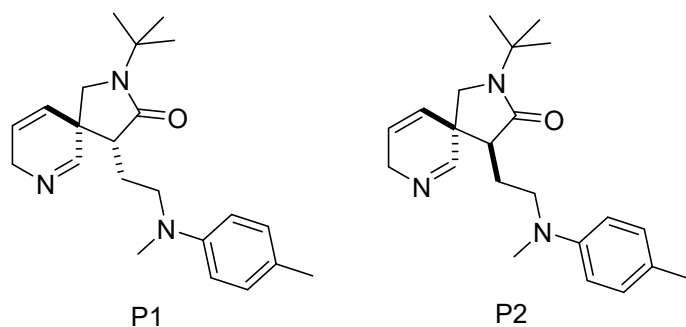

2-(tert-butyl)-4-(2-(methyl(*p*-tolyl)amino)ethyl)-2,7-diazaspiro[4.5]deca-6,9-dien-3-one (**3-37**)

Brown oil, 76 mg, 71% yield. (d.r. = 1:1).

NMR:

[P1] <sup>1</sup>H NMR (400 MHz, Chloroform-*d*) δ 7.74 (s, 1H), 7.01 (d, *J* = 8.3 Hz, 2H), 6.64 (d, *J* = 8.6 Hz, 2H), 5.97 (d, *J* = 10.3 Hz, 1H), 5.57 (dd, *J* = 10.5, 2.3 Hz, 1H), 4.27 – 4.15 (m, 2H), 3.43 (t, *J* = 7.6 Hz, 2H), 3.33 (d, *J* = 10.4 Hz, 1H), 3.23 (d, *J* = 10.4 Hz, 1H), 2.83 (s, 3H), 2.28 (t, *J* = 6.8 Hz, 1H), 2.23 (s, 3H), 2.00 – 1.91 (m, 1H), 1.57 – 1.49 (m, 1H), 1.41 (s, 9H). <sup>13</sup>C NMR (101 MHz, Chloroform-*d*) δ 174.0, 161.7, 147.4, 129.6, 127.5, 125.9, 125.4, 112.7, 54.2, 53.5, 51.2, 50.0, 40.6, 37.8, 27.6, 23.2, 20.1.

[P2] <sup>1</sup>H NMR (400 MHz, Chloroform-*d*) δ 7.67 (q, *J* = 2.7 Hz, 1H), 7.01 (d, *J* = 8.1 Hz, 2H), 6.64 (d, *J* = 8.2 Hz, 2H), 6.03 – 5.94 (m, 1H), 5.75 – 5.66 (m, 1H), 4.21 (q, *J* = 2.5 Hz, 2H), 3.43 (d, *J* = 10.0 Hz, 1H), 3.41 – 3.27 (m, 2H), 3.18 (d, *J* = 10.0 Hz, 1H), 2.83 (s, 3H), 2.40 (t, *J* = 6.8 Hz, 1H), 2.23 (s, 3H), 1.97 – 1.87 (m, 1H), 1.56 – 1.46 (m, 1H), 1.39 (s, 9H). <sup>13</sup>C NMR (101 MHz, Chloroform-*d*) δ 173.6, 163.5, 147.3, 129.6, 126.4, 125.4, 123.7, 112.8, 54.1, 53.6, 51.1, 50.0, 48.9, 41.2, 37.9, 27.6, 23.2, 20.1.

IR(KBr, cm<sup>-1</sup>): 2703, 1686, 1650, 1520, 1476, 1363, 1221, 989, 803, 732.

HRMS(ESI): calcd for  $C_{22}H_{32}N_3O^+$   $[M + H]^+$ : 354.2540; found: 354.2535.

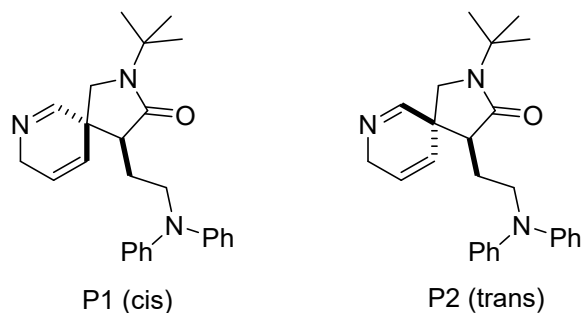

2-(tert-butyl)-4-(2-(diphenylamino)ethyl)-2,7-diazaspiro[4.5]deca-6,9-dien-3-one (**3-38**)

Brown oil, 81 mg, 67% yield. (d.r. = 1:1).

NMR:

[P1]  $^1H$  NMR (400 MHz, Chloroform-*d*)  $\delta$  7.72 (s, 1H), 7.22 (t,  $J = 7.8$  Hz, 4H), 6.97 (d,  $J = 8.0$  Hz, 4H), 6.91 (t,  $J = 7.4$  Hz, 2H), 5.90 – 5.80 (m, 1H), 5.52 – 5.43 (m, 1H), 4.15 (d,  $J = 23.3$  Hz, 1H), 4.05 – 3.96 (m, 1H), 3.97 – 3.81 (m, 2H), 3.32 (d,  $J = 10.3$  Hz, 1H), 3.21 (d,  $J = 10.4$  Hz, 1H), 2.31 (t,  $J = 6.7$  Hz, 1H), 2.07 – 2.00 (m, 1H), 1.64 – 1.56 (m, 1H), 1.41 (s, 9H).  $^{13}C$  NMR (101 MHz, Chloroform-*d*)  $\delta$  173.9, 161.6, 147.6, 129.2, 127.5, 125.6, 121.1, 120.9, 54.2, 53.5, 50.2, 50.1, 49.9, 40.6, 27.6, 24.1.

[P2] NMR:  $^1H$  NMR (400 MHz, Chloroform-*d*)  $\delta$  7.65 (s, 1H), 7.25 (t,  $J = 7.7$  Hz, 4H), 6.99 (d,  $J = 8.0$  Hz, 4H), 6.94 (t,  $J = 7.3$  Hz, 2H), 6.00 – 5.92 (m, 1H), 5.75 – 5.68 (m, 1H), 4.20 (d,  $J = 22.4$  Hz, 1H), 4.08 (d,  $J = 23.5$  Hz, 1H), 3.92 – 3.83 (m, 1H), 3.81 – 3.72 (m, 1H), 3.45 (d,  $J = 10.1$  Hz, 1H), 3.20 (d,  $J = 10.1$  Hz, 1H), 2.44 (t,  $J = 6.9$  Hz, 1H), 2.13 – 2.02 (m, 1H), 1.67 – 1.58 (m, 1H), 1.42 (s, 9H).  $^{13}C$  NMR (101 MHz, Chloroform-*d*)  $\delta$  173.3, 163.3, 147.6, 129.2, 126.4, 123.5, 121.1, 120.8, 54.1, 53.6, 50.1, 49.9, 48.9, 41.1, 27.5, 24.2.

IR(KBr,  $cm^{-1}$ ): 2805, 1687, 1643, 1590, 1496, 1364, 1246, 1188, 1068, 992, 749, 697.

HRMS(ESI): calcd for  $C_{26}H_{32}N_3O^+$   $[M + H]^+$ : 402.2540; found: 402.2535.

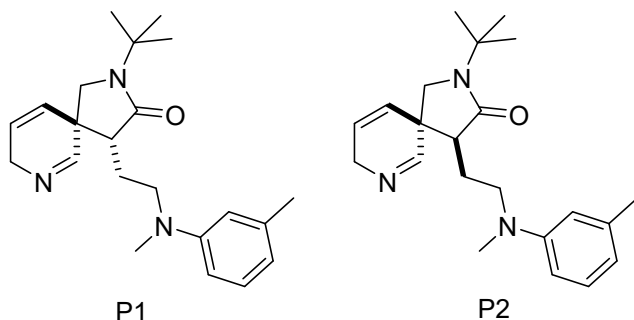

2-(tert-butyl)-4-(2-(methyl(*m*-tolyl)amino)ethyl)-2,7-diazaspiro[4.5]deca-6,9-dien-3-one (**3-39**)

Brown oil, 75 mg, 70% yield. (d.r. = 1:1).

NMR:

[P1] <sup>1</sup>H NMR (400 MHz, Chloroform-*d*) δ 7.74 (s, 1H), 7.08 (t, *J* = 8.1 Hz, 1H), 6.57 – 6.45 (m, 3H), 5.97 (d, *J* = 10.3 Hz, 1H), 5.57 (d, *J* = 10.3 Hz, 1H), 4.26 – 4.11 (m, 2H), 3.52 – 3.40 (m, 2H), 3.33 (d, *J* = 10.5 Hz, 1H), 3.23 (d, *J* = 10.4 Hz, 1H), 2.86 (s, 3H), 2.32 – 2.25 (m, 4H), 2.01 – 1.91 (m, 1H), 1.59 – 1.50 (m, 1H), 1.41 (s, 9H). <sup>13</sup>C NMR (101 MHz, Chloroform-*d*) δ 174.0, 161.7, 149.5, 138.7, 128.9, 127.5, 125.9, 117.0, 113.0, 109.5, 54.2, 53.5, 50.9, 50.0, 50.0, 40.6, 37.6, 27.6, 23.3, 21.8.

[P2] <sup>1</sup>H NMR (400 MHz, Chloroform-*d*) δ 7.68 (q, *J* = 2.7 Hz, 1H), 7.08 (dd, *J* = 9.1, 7.3 Hz, 1H), 6.52 (d, *J* = 6.0 Hz, 3H), 6.50 (d, *J* = 7.5 Hz, 1H), 6.03 – 5.94 (m, 1H), 5.76 – 5.67 (m, 1H), 4.22 (q, *J* = 2.5 Hz, 2H), 3.43 (d, *J* = 10.0 Hz, 1H), 3.38 (t, *J* = 7.8 Hz, 2H), 3.18 (d, *J* = 10.0 Hz, 1H), 2.86 (s, 3H), 2.39 (t, *J* = 6.9 Hz, 1H), 2.29 (s, 3H), 1.97 – 1.87 (m, 1H), 1.56 – 1.48 (m, 1H), 1.39 (s, 9H). <sup>13</sup>C NMR (101 MHz, Chloroform-*d*) δ 173.5, 163.7, 149.3, 138.6, 128.9, 126.3, 123.6, 117.1, 113.0, 109.5, 54.1, 53.6, 50.7, 49.9, 48.9, 41.2, 37.7, 27.6, 23.3, 21.8.

IR(KBr, cm<sup>-1</sup>): 2713, 1686, 1646, 1499, 1363, 1224, 1180, 994, 769, 726.

HRMS(ESI): calcd for C<sub>22</sub>H<sub>32</sub>N<sub>3</sub>O<sup>+</sup> [M + H]<sup>+</sup>: 354.2540; found: 354.2535.

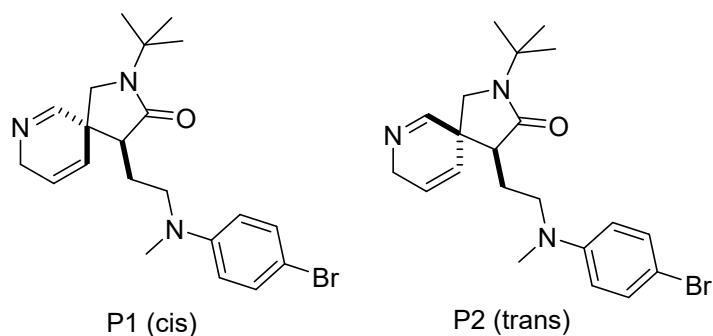

4-(2-((4-bromophenyl)(methyl)amino)ethyl)-2-(tert-butyl)-2,7-diazaspiro[4.5]deca-6,9-dien-3-one (**3-40**)

Brown oil, 90 mg, 72% yield, d.r. = 1:1.

NMR:

[P1] <sup>1</sup>H NMR (400 MHz, Chloroform-*d*) δ 7.72 (s, 1H), 7.25 (d, *J* = 9.0 Hz, 2H), 6.57 (d, *J* = 9.2 Hz, 2H), 6.03 – 5.93 (m, 1H), 5.56 (dd, *J* = 10.3, 2.3 Hz, 1H), 4.25 – 4.11 (m, 2H), 3.56 – 3.46 (m, 1H), 3.46 – 3.37 (m, 1H), 3.34 (d, *J* = 10.4 Hz, 1H), 3.24 (d, *J* = 10.5 Hz, 1H), 2.85 (s, 3H), 2.25 – 2.18 (m, 1H), 1.96 – 1.87 (m, 1H), 1.57 – 1.48 (m, 1H), 1.41 (s, 9H). <sup>13</sup>C NMR (101 MHz, Chloroform-*d*) δ 173.8, 161.5, 148.1, 131.6, 127.6, 125.7, 113.7, 107.8, 54.2, 53.4, 50.7, 49.9, 40.5, 37.7, 27.6, 23.0.

[P2] <sup>1</sup>H NMR (500 MHz, Chloroform-*d*) δ 7.59 (s, 1H), 7.18 (d, *J* = 9.0 Hz, 2H), 6.50 (d, *J* = 9.2 Hz, 2H), 5.96 – 5.87 (m, 1H), 5.67 – 5.59 (m, 1H), 4.18 – 4.08 (m, 2H), 3.41 – 3.32 (m, 2H), 3.29 – 3.22 (m, 1H), 3.12 (d, *J* = 10.1 Hz, 1H), 2.77 (s, 3H), 2.28 (t, *J* = 6.8 Hz, 1H), 1.85 – 1.76 (m, 1H), 1.45 –

1.38 (m, 1H), 1.32 (s, 9H). <sup>13</sup>C NMR (126 MHz, Chloroform-*d*) δ 173.4, 163.3, 148.2, 131.7, 126.5, 123.6, 113.9, 108.0, 54.2, 53.6, 50.7, 50.0, 48.8, 41.2, 37.8, 27.6, 23.2.

IR(KBr, cm<sup>-1</sup>): 1677, 1599, 1501, 1362, 1075, 774.

HRMS(ESI): calcd for C<sub>21</sub>H<sub>29</sub>N<sub>3</sub>BrO<sup>+</sup> [M + H]<sup>+</sup>: 418.1489; found: 418.1484.

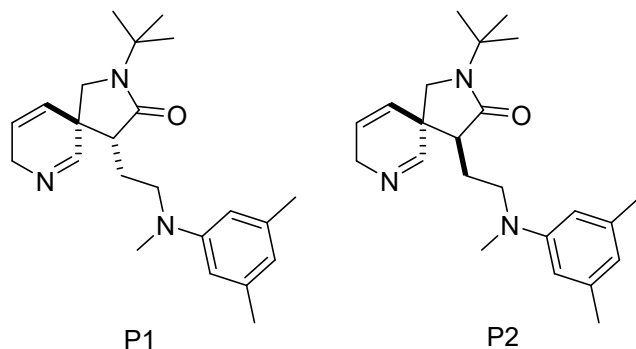

2-(tert-butyl)-4-(2-((3,5-dimethylphenyl)(methyl)amino)ethyl)-2,7-diazaspiro[4.5]deca-6,9-dien-3-one  
(**3-41**)

Brown oil, 76 mg, 69% yield. (d.r. = 1:1).

NMR:

[**P1**] <sup>1</sup>H NMR (400 MHz, Chloroform-*d*) δ 7.75 (d, *J* = 3.0 Hz, 1H), 6.35 (s, 3H), 6.01 – 5.93 (m, 1H), 5.62 – 5.54 (m, 1H), 4.25 – 4.14 (m, 2H), 3.55 – 3.43 (m, 1H), 3.45 – 3.35 (m, 1H), 3.33 (d, *J* = 10.4 Hz, 1H), 3.23 (d, *J* = 10.4 Hz, 1H), 2.85 (s, 3H), 2.31 – 2.26 (m, 2H), 2.25 (s, 6H), 2.01 – 1.89 (m, 1H), 1.60 – 1.50 (m, 1H), 1.41 (s, 9H). <sup>13</sup>C NMR (101 MHz, Chloroform-*d*) δ 174.0, 161.9, 149.7, 138.6, 127.4, 126.0, 118.2, 110.3, 54.2, 53.5, 50.9, 50.0, 49.9, 40.7, 37.6, 27.6, 23.5, 21.7.

[**P2**] <sup>1</sup>H NMR (400 MHz, Chloroform-*d*) δ 7.68 (d, *J* = 3.2 Hz, 1H), 6.34 (s, 3H), 6.03 – 5.96 (m, 1H), 5.76 – 5.69 (m, 1H), 4.22 (q, *J* = 2.5 Hz, 2H), 3.43 (d, *J* = 10.0 Hz, 1H), 3.41 – 3.27 (m, 2H), 3.18 (d, *J* = 10.0 Hz, 1H), 2.85 (s, 3H), 2.40 (t, *J* = 6.8 Hz, 1H), 2.25 (s, 6H), 1.96 – 1.87 (m, 1H), 1.56 – 1.47 (m, 1H), 1.39 (s, 9H). <sup>13</sup>C NMR (101 MHz, Chloroform-*d*) δ 173.6, 163.7, 149.5, 138.5, 126.3, 123.7, 118.2, 110.3, 54.1, 53.6, 50.7, 49.9, 48.9, 41.2, 37.7, 27.6, 23.4, 21.7.

IR(KBr, cm<sup>-1</sup>): 2709, 1687, 1644, 1598, 1484, 1400, 1227, 992, 765, 727.

HRMS(ESI): calcd for C<sub>23</sub>H<sub>34</sub>N<sub>3</sub>O<sup>+</sup> [M + H]<sup>+</sup>: 368.2696; found: 368.2691.

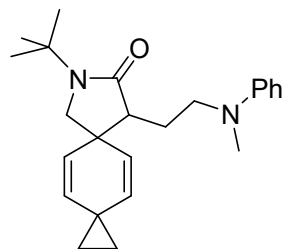



8-(tert-butyl)-10-(2-(methyl(phenyl)amino)ethyl)-8-azadispiro[2.2.4<sup>6</sup>.2<sup>3</sup>]dodeca-4,11-dien-9-one (**3-42**)

Brown oil, 70 mg, 64% yield.

NMR: <sup>1</sup>H NMR (500 MHz, Chloroform-*d*) δ 7.18 (t, *J* = 8.0 Hz, 2H), 6.73 (d, *J* = 8.1 Hz, 2H), 6.65 (t, *J* = 7.2 Hz, 1H), 5.59 (dd, *J* = 10.0, 2.0 Hz, 1H), 5.46 (dd, *J* = 9.8, 2.1 Hz, 1H), 5.27 – 5.19 (m, 2H), 3.61 – 3.53 (m, 1H), 3.34 – 3.27 (m, 1H), 3.26 (s, 2H), 2.90 (s, 3H), 2.18 (dd, *J* = 7.8, 6.0 Hz, 1H), 2.01 – 1.93 (m, 1H), 1.69 – 1.60 (m, 1H), 1.39 (s, 9H), 0.93 – 0.84 (m, 4H). <sup>13</sup>C NMR (126 MHz, Chloroform-*d*) δ 174.7, 149.3, 134.3, 133.2, 128.9, 128.6, 125.5, 115.7, 112.2, 57.0, 53.8, 51.8, 51.0, 42.4, 37.6, 27.6, 23.2, 20.8, 16.6, 16.3.

IR(KBr, cm<sup>-1</sup>): 2720, 1601, 1505, 1362, 1239, 1046, 925, 747, 649.

HRMS(ESI): calcd for C<sub>24</sub>H<sub>33</sub>N<sub>2</sub>O<sup>+</sup> [M + H]<sup>+</sup>: 365.2587; found: 365.2582.

## V. Synthesis of multicyclic *N*-containing skeletons

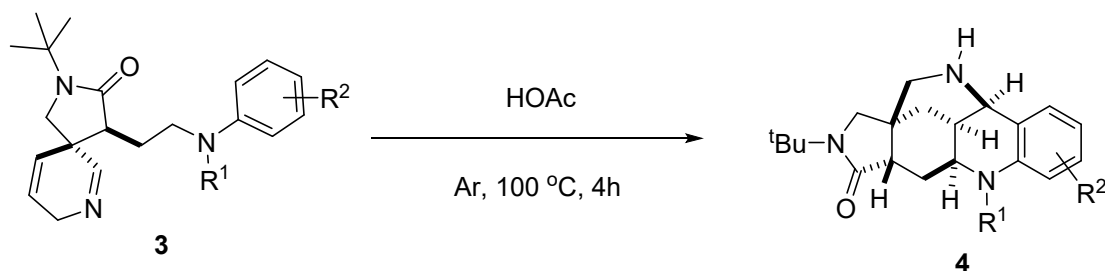

To a solution of **3** (0.1 mmol, 1.0 eq) in HOAc (2 mL) was stirred at 100 °C under argon atmosphere for 4 hours. Then the reaction was quenched with water and adjusted pH to 7 - 8, followed by extracting with EtOAc for 3 times. The combined organic layer was dried over anhydrous Na<sub>2</sub>SO<sub>4</sub> and filtered. The solvent was removed under reduced pressure to give crude product **4**, which was purified by silica gel column chromatography (PE / EA = 2 / 1 ~ 1 / 1) to obtain product **4**. The details data of the products are summarized below.

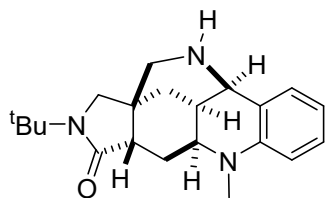

2-(tert-butyl)-5-methyl-1,2,4,4a,5,10,10a,11-octahydro-10,11a-(epiminomethano)pyrrolo[3,4-b]acridin-3(3aH)-one (**4-1**)

White solid, 20.3 mg, 60% yield, m.p. = 207.9 – 209.2 °C.

NMR: <sup>1</sup>H NMR (500 MHz, Chloroform-*d*) δ 7.14 (t, *J* = 7.8 Hz, 1H), 7.06 (d, *J* = 7.3 Hz, 1H), 6.60 (t, *J* = 7.3 Hz, 1H), 6.56 (d, *J* = 8.2 Hz, 1H), 3.85 (d, *J* = 3.1 Hz, 1H), 3.35 – 3.28 (m, 1H), 3.09 – 3.04 (m, 2H), 2.98 (d, *J* = 9.5 Hz, 1H), 2.97 – 2.93 (m, 4H), 2.54 (dd, *J* = 13.9, 7.6 Hz, 1H), 2.48 (d, *J* = 9.9 Hz, 1H), 2.18 (p, *J* = 4.0 Hz, 1H), 1.98 – 1.90 (m, 1H), 1.87 – 1.82 (m, 1H), 1.70 – 1.64 (m, 2H), 1.40 (s, 9H). <sup>13</sup>C NMR (126 MHz, Chloroform-*d*) δ 175.2, 143.4, 129.5, 128.9, 123.4, 115.5, 111.0, 56.7, 55.0, 54.0, 53.7, 53.3, 49.1, 36.8, 35.5, 34.5, 31.7, 27.7, 25.5.

IR(KBr, cm<sup>-1</sup>): 2830, 1598, 1356, 1088, 774, 742, 530.

HRMS(ESI): calcd for C<sub>21</sub>H<sub>30</sub>N<sub>3</sub>O<sup>+</sup> [M + H]<sup>+</sup>: 340.2383; found: 340.2380.

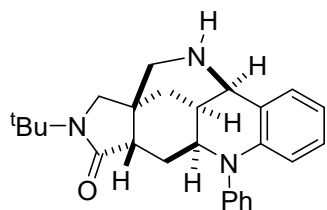

2-(tert-butyl)-5-phenyl-1,2,4,4a,5,10,10a,11-octahydro-10,11a-(epiminomethano)pyrrolo[3,4-b]acridin-3(3aH)-one (**4-2**)

White solid, 30.5 mg, 76% yield.

NMR:  $^1\text{H}$  NMR (500 MHz, Methanol- $d_4$ )  $\delta$  7.45 (t,  $J = 7.4$  Hz, 3H), 7.31 (d,  $J = 7.9$  Hz, 2H), 7.27 (t,  $J = 7.4$  Hz, 1H), 7.10 (t,  $J = 7.9$  Hz, 1H), 6.80 (t,  $J = 7.5$  Hz, 1H), 6.62 (d,  $J = 8.5$  Hz, 1H), 4.58 (d,  $J = 5.0$  Hz, 1H), 3.75 – 3.67 (m, 1H), 3.47 (d,  $J = 12.4$  Hz, 1H), 3.42 – 3.35 (m, 2H), 3.34 – 3.26 (m, 2H), 2.71 (d,  $J = 8.5$  Hz, 2H), 2.54 (dd,  $J = 15.6, 7.6$  Hz, 1H), 2.10 – 2.00 (m, 2H), 1.93 (d,  $J = 13.9$  Hz, 1H), 1.41 (s, 9H).  $^{13}\text{C}$  NMR (126 MHz, Methanol- $d_4$ )  $\delta$  173.8, 146.0, 142.6, 130.5, 130.1, 129.7, 126.7, 125.7, 118.0, 116.4, 116.3, 56.1, 54.2, 52.2, 51.7, 50.4, 47.2, 33.0, 31.1, 30.1, 26.5, 24.4.

IR(KBr,  $\text{cm}^{-1}$ ): 2830, 1596, 1358, 1241, 1071, 774, 543.

HRMS(ESI): calcd for  $\text{C}_{26}\text{H}_{32}\text{N}_3\text{O}$   $[\text{M} + \text{H}]^+$ : 402.2540; found: 402.2536.

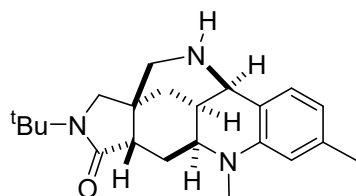

2-(tert-butyl)-5,7-dimethyl-1,2,4,4a,5,10,10a,11-octahydro-10,11a-(epiminomethano)pyrrolo[3,4-b]acridin-3(3aH)-one (**4-3**)

White-off solid, 24.4 mg, 69% yield.

NMR:  $^1\text{H}$  NMR (500 MHz, Chloroform- $d$ )  $\delta$  6.97 (d,  $J = 7.6$  Hz, 1H), 6.44 (d,  $J = 7.8$  Hz, 1H), 6.38 (s, 1H), 3.84 (s, 1H), 3.36 – 3.23 (m, 1H), 3.06 (d,  $J = 10.4$  Hz, 2H), 3.00 – 2.90 (m, 5H), 2.53 (dd,  $J = 14.0, 7.5$  Hz, 1H), 2.48 (d,  $J = 9.3$  Hz, 1H), 2.28 (s, 3H), 2.16 (s, 1H), 1.92 (q,  $J = 10.1$  Hz, 1H), 1.84 (d,  $J = 13.6$  Hz, 1H), 1.69 (t,  $J = 14.3$  Hz, 2H), 1.39 (s, 9H).  $^{13}\text{C}$  NMR (126 MHz, Chloroform- $d$ )  $\delta$  175.2, 143.3, 138.7, 129.5, 120.6, 116.4, 111.6, 56.7, 54.9, 53.7, 53.6, 53.3, 49.1, 36.8, 35.5, 34.6, 31.9, 27.7, 25.4, 21.7.

IR(KBr,  $\text{cm}^{-1}$ ): 2732, 1675, 1607, 1510, 1360, 1221, 1143, 963, 784.

HRMS(ESI): calcd for  $\text{C}_{22}\text{H}_{32}\text{N}_3\text{O}^+$   $[\text{M} + \text{H}]^+$ : 354.2540; found: 354.2536.

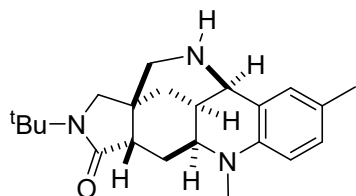

2-(tert-butyl)-5,8-dimethyl-1,2,4,4a,5,10,10a,11-octahydro-10,11a-(epiminomethano)pyrrolo[3,4-b]acridin-3(3aH)-one (**4-4**)

White-off solid, 25 mg, 71% yield.

NMR:  $^1\text{H}$  NMR (500 MHz, Chloroform-*d*)  $\delta$  6.97 (d,  $J = 8.7$  Hz, 1H), 6.94 (s, 1H), 6.50 (d,  $J = 8.4$  Hz, 1H), 3.86 (s, 1H), 3.30 (p,  $J = 6.0$  Hz, 1H), 3.11 – 3.04 (m, 2H), 3.01 – 2.94 (m, 2H), 2.93 (s, 3H), 2.24 – 2.16 (m, 4H), 1.94 – 1.76 (m, 6H), 1.73 – 1.66 (m, 1H), 1.39 (s, 9H).  $^{13}\text{C}$  NMR (126 MHz, Chloroform-*d*)  $\delta$  175.1, 141.2, 130.3, 129.6, 124.7, 123.0, 111.3, 56.6, 54.7, 53.8, 53.7, 53.2, 48.9, 36.8, 35.4, 34.5, 31.9, 27.7, 24.9, 20.0.

IR(KBr,  $\text{cm}^{-1}$ ): 2832, 1674, 1606, 1510, 1361, 1211, 1108, 993, 774.

HRMS(ESI): calcd for  $\text{C}_{22}\text{H}_{32}\text{N}_3\text{O}^+$   $[\text{M} + \text{H}]^+$ : 354.2540; found: 354.2536.

## VI. Mechanism studies

### vii-1. Radical trapping experiment

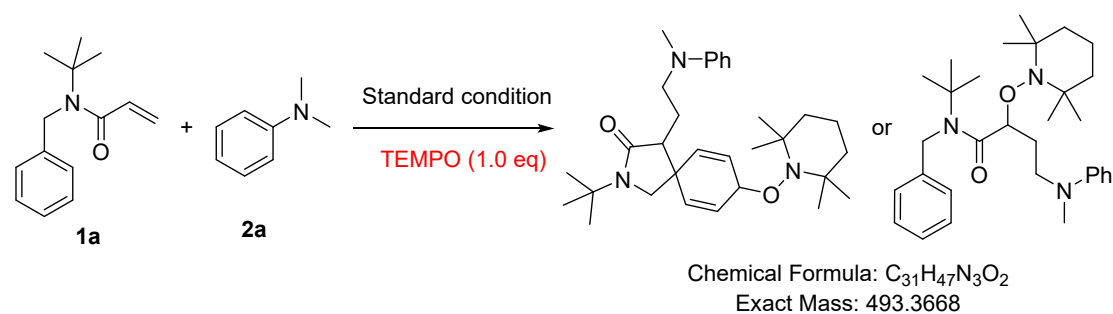

HRMS(ESI): calcd for  $C_{31}H_{48}N_3O_2^+ [M + H]^+$ : 494.3741; found: 494.3736.

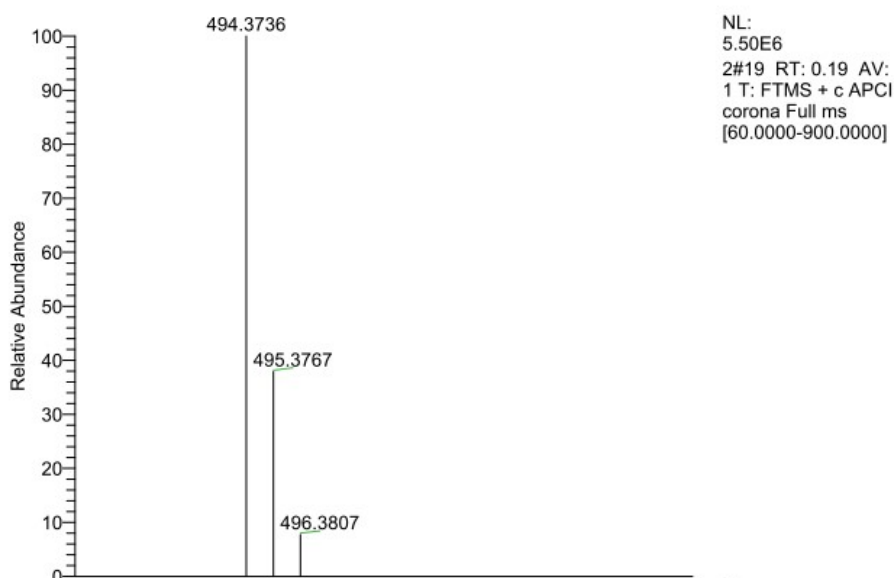

### vii-2. Electrochemical measurements

In a nitrogen atmosphere, a standard three-electrode cell configuration was used to collect cyclic voltammograms (CVs) at room temperature with a CHI660e electrochemical workstation. A 3 mm glassy carbon electrode, an Ag/AgCl (3 M KCl) electrode, and a platinum sheet auxiliary electrode were used as the working electrode, reference electrode, and counter electrode, respectively. The electrolyte cell contains 0.1 M tetrabutylammonium hexafluorophosphate ( $Bu_4NPF_6$ ) and 1 mM substrates in MeCN. The scan rate is 0.1 V/s and the range is -2.0 V to 2.0 V. For comparison with reported redox potentials of the photosensitizers, the reference electrode potential was converted to the saturated calomel electrode (SCE) scale. According to the CVs results about **1a** (Fig S1) and **2a** (Fig S2), it's clear that the single electron transfer between **2a** and 3DPAFIPN ( $E_{p/2} = +1.09$  V vs SCE)<sup>[1]</sup> could be smoothly occurred, while **1a** substrate can neither be oxidized nor reduced.

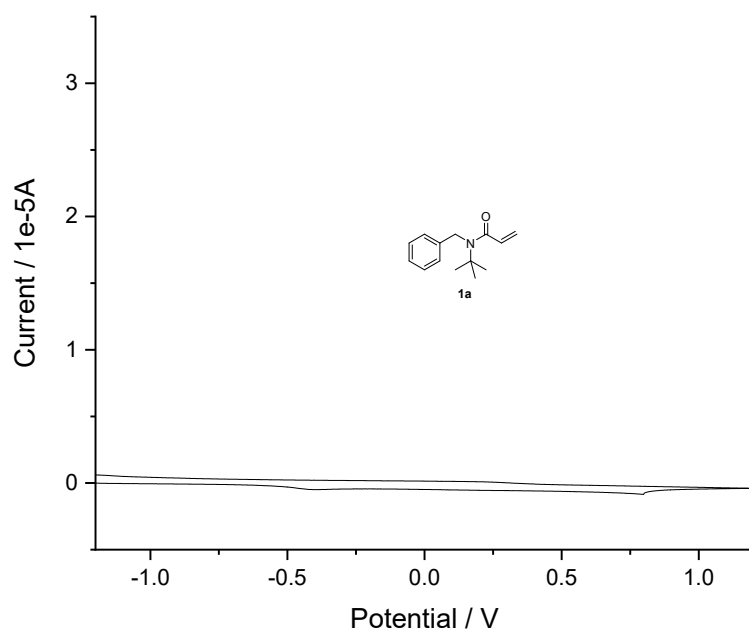

**Fig S1** Cyclic voltammogram of **1a** in MeCN

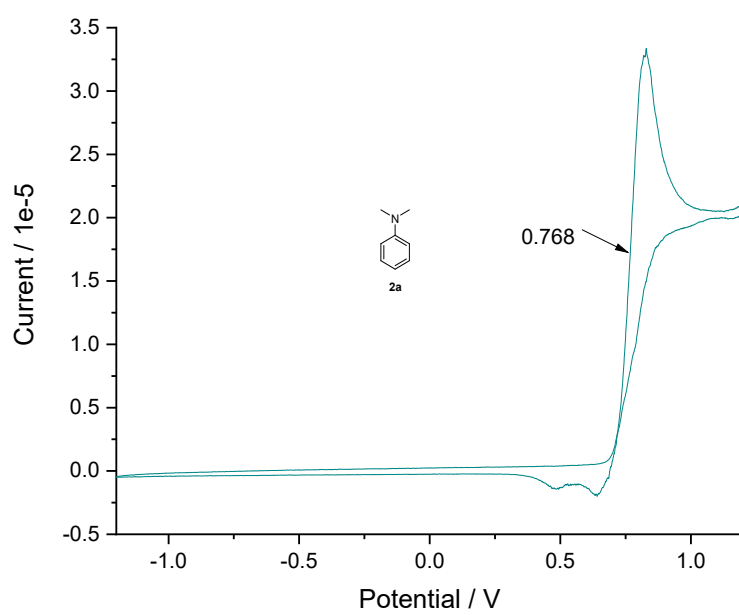

**Fig S2** Cyclic voltammogram of **2a** in MeCN

### vii-3. Stern–Volmer luminescence quenching studies

Stern-Volmer experiments were conducted on a Hitachi F7000 Fluorescence Spectrophotometer. Each component was prepared in DCE prior to each set of experiments. The solutions were irradiated at 365 nm and the luminescence measured at 470 nm. Linear regression of  $I^0/I_1$  against concentration was performed in Origin.

| species         | Concentration (mM) |
|-----------------|--------------------|
| <b>3DPAFIPN</b> | 0.01               |
| <b>2a</b>       | varied             |
| <b>1a</b>       | varied             |

| substrate (mM) | 0.03  | 0.06  | 0.09  | 0.12  | 0.15  |
|----------------|-------|-------|-------|-------|-------|
| <b>2a</b>      | 1.606 | 2.194 | 2.576 | 3.030 | 3.731 |
| <b>1a</b>      | 0.992 | 1.051 | 1.073 | 0.964 | 1.008 |

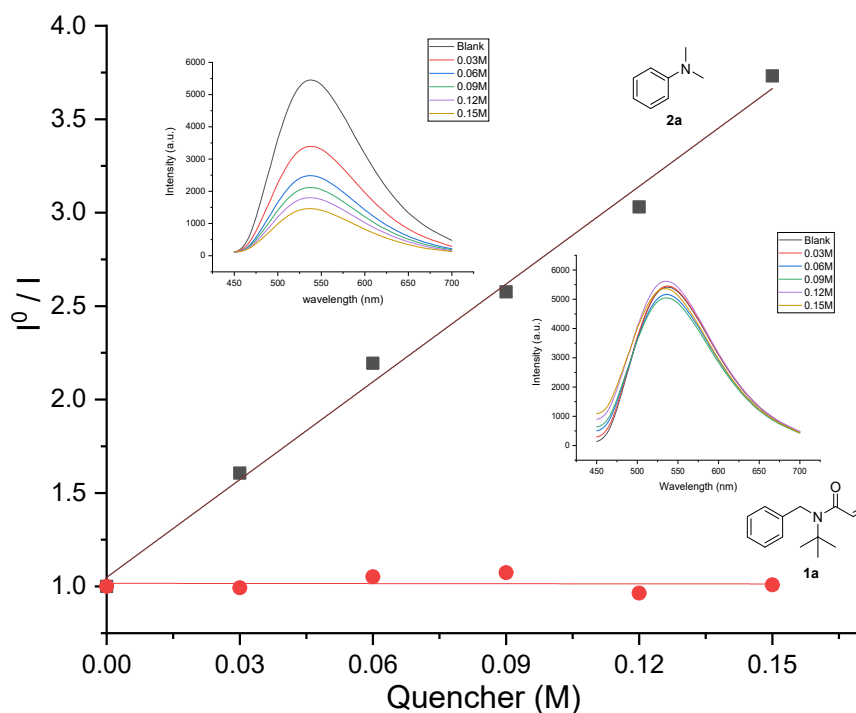

Fig S3 Stern-Volmer experiments for **1a** and **2a**





## VII. Computational details

All calculations were carried out with the Gaussian 09 programs.<sup>[2]</sup> The geometries of all the species were fully optimized by using density functional theory (DFT) of the B3LYP functional<sup>[3]</sup> with the dispersion correction (Grimme's D3).<sup>[4]</sup> For these optimizations, the basis set was used 6-31G(d,p) for all the atoms. Vibrational frequency calculations done at the B3LYP-D3/6-31G(d,p) level of theory were used to characterize all the stationary points as either minima (the number of imaginary frequencies (NIMAG=0) or transition states (NIMAG=1)). In order to get more accurate electronic energies, the single point energy was calculated under M062x/SMD/6-311G(d,p) level in *N,N*-dimethylacetamide with SMD<sup>[5]</sup> model. The 3D images of the calculated structures were prepared using VMD program.<sup>[6]</sup>

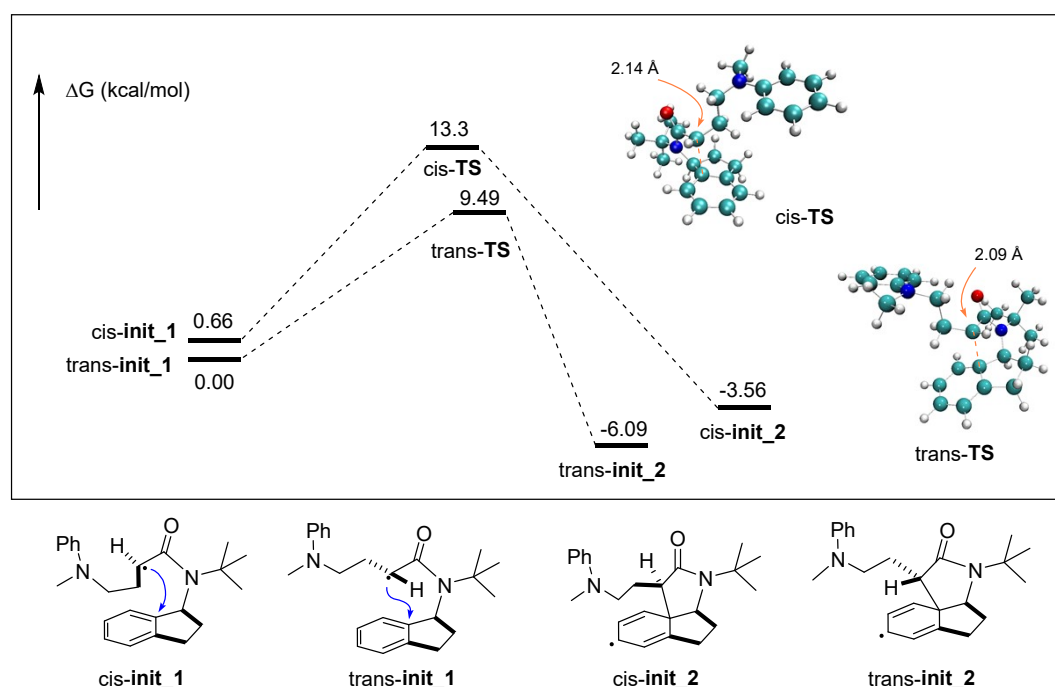

### *cis-init\_1*

|   |             |            |             |
|---|-------------|------------|-------------|
| C | 0.20376000  | 3.36445700 | -0.18513700 |
| C | 0.84956000  | 2.91839500 | -1.34138900 |
| C | 0.35600000  | 1.81748100 | -2.04990000 |
| C | -0.78186300 | 1.14211100 | -1.60234400 |
| C | -1.40899000 | 1.58002200 | -0.43863100 |
| C | -0.93301600 | 2.69226100 | 0.26053700  |
| C | -2.65788100 | 1.02294000 | 0.22342600  |

|   |             |             |             |
|---|-------------|-------------|-------------|
| C | -2.69353200 | 1.73432300  | 1.60882200  |
| C | -1.80871300 | 2.99780600  | 1.45767900  |
| N | -2.78458000 | -0.44116500 | 0.25005200  |
| C | -4.05812300 | -1.08816500 | -0.21965300 |
| C | -3.90045200 | -1.55246500 | -1.67802100 |
| C | -4.40273600 | -2.26960400 | 0.70856400  |
| C | -5.24032800 | -0.10527500 | -0.13320400 |
| C | -1.65832600 | -1.23926600 | 0.43642600  |
| O | -1.61733900 | -2.42730600 | 0.06615600  |
| C | -0.49437000 | -0.67670600 | 1.10419500  |
| C | 0.78539600  | -1.42705300 | 1.09286900  |
| C | 1.36372800  | -1.58507900 | -0.35205000 |
| N | 2.77994000  | -1.88923500 | -0.37626200 |
| C | 3.70011400  | -0.88296600 | -0.08602700 |
| C | 3.15747700  | -3.27354700 | -0.15406400 |
| C | 5.05933300  | -1.18438400 | 0.14688900  |
| C | 5.98436200  | -0.17260000 | 0.39143800  |
| C | 5.59712200  | 1.16623900  | 0.42723900  |
| C | 4.25242400  | 1.47292400  | 0.21631900  |
| C | 3.31475800  | 0.47614500  | -0.02989700 |
| H | 0.58970100  | 4.22002700  | 0.36216100  |
| H | 1.74470800  | 3.42383300  | -1.68996100 |
| H | 0.86937000  | 1.47871100  | -2.94424400 |
| H | -1.15634100 | 0.27214400  | -2.13362000 |
| H | -3.49885600 | 1.38872400  | -0.36438600 |
| H | -2.28566900 | 1.06148100  | 2.36667800  |
| H | -3.71644000 | 1.97050100  | 1.91208600  |

|   |             |             |             |
|---|-------------|-------------|-------------|
| H | -1.23006700 | 3.21975800  | 2.36041500  |
| H | -2.42471500 | 3.88375400  | 1.25606000  |
| H | -3.09664500 | -2.28406100 | -1.75512100 |
| H | -3.66981900 | -0.69796800 | -2.32410200 |
| H | -4.83100700 | -2.00449600 | -2.03733100 |
| H | -3.62913800 | -3.03304700 | 0.68730100  |
| H | -5.34905300 | -2.71618800 | 0.38845800  |
| H | -4.52386200 | -1.91326100 | 1.73661000  |
| H | -5.20702300 | 0.68172100  | -0.89149900 |
| H | -5.31367500 | 0.35700800  | 0.85559700  |
| H | -6.16110400 | -0.66827400 | -0.30569000 |
| H | 0.64091200  | -2.43521600 | 1.49938800  |
| H | 1.52479100  | -0.90807200 | 1.70828800  |
| H | 1.18316200  | -0.67393100 | -0.92243300 |
| H | 0.81531000  | -2.38234500 | -0.85527100 |
| H | 2.30722900  | -3.91155900 | -0.39944200 |
| H | 3.45369900  | -3.47637000 | 0.88650600  |
| H | 3.99042000  | -3.56301600 | -0.80418400 |
| H | 5.40060200  | -2.21157100 | 0.13333800  |
| H | 7.02298500  | -0.44274300 | 0.56075800  |
| H | 6.32265100  | 1.94913200  | 0.62177400  |
| H | 3.91509500  | 2.50543300  | 0.24879700  |
| H | 2.28382900  | 0.76680900  | -0.17664500 |
| H | -0.51406700 | 0.30635700  | 1.54941900  |

**trans-init\_1**

|   |             |             |            |
|---|-------------|-------------|------------|
| C | -2.67313400 | -3.57301400 | 0.54112900 |
|---|-------------|-------------|------------|

|   |             |             |             |
|---|-------------|-------------|-------------|
| C | -1.75360500 | -3.65870600 | 1.58933200  |
| C | -1.21398200 | -2.49980000 | 2.15730000  |
| C | -1.58177200 | -1.24180300 | 1.67828600  |
| C | -2.48259900 | -1.16320500 | 0.61722000  |
| C | -3.03750500 | -2.31761200 | 0.05849000  |
| C | -3.05210000 | 0.07899400  | -0.04730400 |
| C | -3.74981700 | -0.47471800 | -1.32207100 |
| C | -4.02554300 | -1.97096400 | -1.03461100 |
| N | -2.11177500 | 1.19164900  | -0.26771900 |
| C | -2.54340800 | 2.57219200  | 0.12654800  |
| C | -2.28551200 | 2.79192400  | 1.62644100  |
| C | -1.79255900 | 3.61760000  | -0.72037500 |
| C | -4.04079800 | 2.76097000  | -0.18539300 |
| C | -0.75455700 | 0.90627100  | -0.38361500 |
| O | 0.12841400  | 1.67604800  | 0.04003600  |
| C | -0.36950800 | -0.32891800 | -1.04652000 |
| C | 1.02602700  | -0.81223500 | -0.93187900 |
| C | 2.01540700  | 0.00425700  | -1.82533400 |
| N | 3.40553900  | -0.35240300 | -1.62556700 |
| C | 4.04669000  | 0.01508600  | -0.44009900 |
| C | 3.90109300  | -1.50268300 | -2.35886800 |
| C | 5.30379700  | -0.52862200 | -0.10040700 |
| C | 5.96472900  | -0.12924100 | 1.05845000  |
| C | 5.39888300  | 0.80697400  | 1.92190500  |
| C | 4.14723700  | 1.33483700  | 1.60254200  |
| C | 3.47091200  | 0.95189200  | 0.44851900  |
| H | -3.09277400 | -4.47541300 | 0.10485800  |

|   |             |             |             |
|---|-------------|-------------|-------------|
| H | -1.45386300 | -4.63219000 | 1.96531300  |
| H | -0.49955300 | -2.57902100 | 2.97072100  |
| H | -1.14928800 | -0.34054700 | 2.10208500  |
| H | -3.81914700 | 0.46034500  | 0.63091300  |
| H | -3.06948900 | -0.36305200 | -2.17050100 |
| H | -4.65618000 | 0.08454100  | -1.56496700 |
| H | -3.91618200 | -2.60058000 | -1.92384700 |
| H | -5.05238800 | -2.11577200 | -0.67378900 |
| H | -1.21876200 | 2.70014600  | 1.83546300  |
| H | -2.82871900 | 2.05162200  | 2.22451700  |
| H | -2.62398000 | 3.78634300  | 1.93563100  |
| H | -0.72571000 | 3.61573900  | -0.51398700 |
| H | -2.19587600 | 4.61039100  | -0.49984800 |
| H | -1.94679800 | 3.41695000  | -1.78545400 |
| H | -4.70022300 | 2.16758000  | 0.45236500  |
| H | -4.25702600 | 2.52166100  | -1.23055900 |
| H | -4.29950200 | 3.80980100  | -0.01905000 |
| H | 1.08903400  | -1.87029500 | -1.20531300 |
| H | 1.37093700  | -0.70604400 | 0.10181800  |
| H | 1.86790500  | 1.06355700  | -1.61458300 |
| H | 1.77211800  | -0.15418900 | -2.87959100 |
| H | 3.26962600  | -1.66094700 | -3.23475100 |
| H | 3.90274100  | -2.42764300 | -1.76162500 |
| H | 4.92287400  | -1.33084400 | -2.71426400 |
| H | 5.77463300  | -1.26286600 | -0.74144900 |
| H | 6.93409600  | -0.56424300 | 1.28560600  |
| H | 5.91616900  | 1.11164900  | 2.82581900  |

|   |             |             |             |
|---|-------------|-------------|-------------|
| H | 3.67614300  | 2.05581800  | 2.26473200  |
| H | 2.48991000  | 1.36955100  | 0.25882500  |
| H | -1.07464400 | -0.86201900 | -1.67048900 |

**cis-TS**

|   |             |             |             |
|---|-------------|-------------|-------------|
| C | 0.22422600  | 3.28532500  | 0.64955400  |
| C | 0.03600400  | 3.95406700  | -0.56928000 |
| C | -1.00706900 | 3.57060500  | -1.43265500 |
| C | -1.81363400 | 2.48761600  | -1.12923900 |
| C | -1.51033900 | 1.69189600  | 0.01631000  |
| C | -0.57685700 | 2.20071500  | 0.96673100  |
| C | -2.48495900 | 0.74559200  | 0.70854100  |
| C | -1.78025300 | 0.39411500  | 2.05632000  |
| C | -0.66604400 | 1.45151400  | 2.27581700  |
| N | -2.79313500 | -0.41625500 | -0.13244100 |
| C | -4.01228300 | -1.25689100 | 0.08876700  |
| C | -4.66137300 | -1.56309500 | -1.27278600 |
| C | -3.61653800 | -2.55798400 | 0.81079100  |
| C | -5.03807200 | -0.50184600 | 0.94548400  |
| C | -1.75155100 | -0.87984900 | -0.89408100 |
| O | -1.74534000 | -1.95257100 | -1.50551300 |
| C | -0.55932800 | 0.02696000  | -0.93375900 |
| C | 0.68465700  | -0.44488800 | -0.23686500 |
| C | 1.49030300  | -1.44177600 | -1.10495500 |
| N | 2.69004700  | -1.94247100 | -0.44974600 |
| C | 3.75797700  | -1.07927000 | -0.20822700 |
| C | 2.51245800  | -3.09029900 | 0.42155700  |

|   |             |             |             |
|---|-------------|-------------|-------------|
| C | 4.75816300  | -1.39972500 | 0.73509700  |
| C | 5.84411700  | -0.55294000 | 0.94334400  |
| C | 5.97272500  | 0.64205800  | 0.23809400  |
| C | 4.98386200  | 0.97490800  | -0.68847400 |
| C | 3.89492400  | 0.13935000  | -0.91108500 |
| H | 0.97019700  | 3.64132600  | 1.35521000  |
| H | 0.66191800  | 4.80366300  | -0.82224500 |
| H | -1.19074000 | 4.14333400  | -2.33692500 |
| H | -2.62293300 | 2.18784900  | -1.78901600 |
| H | -3.41302000 | 1.28562800  | 0.89806600  |
| H | -1.35249200 | -0.60738700 | 1.97234100  |
| H | -2.49125800 | 0.36621200  | 2.88605200  |
| H | 0.28603800  | 0.98602900  | 2.55553100  |
| H | -0.92365000 | 2.14065800  | 3.08896800  |
| H | -3.98169200 | -2.12641100 | -1.90971600 |
| H | -4.93034900 | -0.63067500 | -1.77909500 |
| H | -5.57464600 | -2.14677700 | -1.12100800 |
| H | -2.88414400 | -3.11086900 | 0.22236000  |
| H | -4.49901400 | -3.18894000 | 0.95623200  |
| H | -3.19201900 | -2.33782600 | 1.79541400  |
| H | -5.36634000 | 0.42585500  | 0.46738600  |
| H | -4.66177500 | -0.27127300 | 1.94600500  |
| H | -5.91739800 | -1.13996800 | 1.06569700  |
| H | 0.43969000  | -0.93522000 | 0.71167300  |
| H | 1.32125300  | 0.41506000  | 0.00017700  |
| H | 1.75608500  | -0.96904600 | -2.05550100 |
| H | 0.85156800  | -2.29013700 | -1.35617100 |

|   |             |             |             |
|---|-------------|-------------|-------------|
| H | 1.64577800  | -3.65856600 | 0.08087000  |
| H | 2.35283100  | -2.81530100 | 1.47639500  |
| H | 3.38412100  | -3.75129300 | 0.37544700  |
| H | 4.69238100  | -2.31307800 | 1.31179200  |
| H | 6.59517900  | -0.83575400 | 1.67567700  |
| H | 6.81830100  | 1.30001600  | 0.40850900  |
| H | 5.05420100  | 1.90253400  | -1.24953900 |
| H | 3.15085400  | 0.43820400  | -1.63814800 |
| H | -0.38128000 | 0.44684900  | -1.92301600 |

**trans-TS**

|   |            |             |             |
|---|------------|-------------|-------------|
| C | 1.80256800 | 3.66626300  | 0.54128600  |
| C | 0.90332400 | 3.62841100  | 1.61939900  |
| C | 0.60718600 | 2.40482900  | 2.25078000  |
| C | 1.14475500 | 1.21959800  | 1.78498200  |
| C | 1.91757700 | 1.22634700  | 0.58225500  |
| C | 2.34722400 | 2.48832700  | 0.06232100  |
| C | 2.92751800 | 0.14655300  | 0.18701900  |
| C | 3.69641600 | 0.77414300  | -1.01639000 |
| C | 3.43879500 | 2.30526700  | -0.96799200 |
| N | 2.23549900 | -1.11087600 | -0.10314500 |
| C | 2.83968100 | -2.45989700 | 0.11399700  |
| C | 2.06666600 | -3.18434900 | 1.22999700  |
| C | 2.77644200 | -3.25453700 | -1.20286800 |
| C | 4.31206700 | -2.33085000 | 0.52952100  |
| C | 0.95122600 | -0.96364000 | -0.56110900 |
| O | 0.14991700 | -1.89358600 | -0.71460300 |



|   |             |             |             |
|---|-------------|-------------|-------------|
| C | 0.59027500  | 0.45936600  | -0.83107000 |
| C | -0.82653700 | 0.87934900  | -0.59786200 |
| C | -1.77913400 | 0.41140900  | -1.72718300 |
| N | -3.18312400 | 0.65418100  | -1.43747200 |
| C | -3.82619200 | -0.12578200 | -0.47377400 |
| C | -3.67870800 | 1.99397900  | -1.69238500 |
| C | -5.08761400 | 0.24908100  | 0.03602900  |
| C | -5.75058500 | -0.55058800 | 0.96392300  |
| C | -5.18331500 | -1.73614500 | 1.42678200  |
| C | -3.92767700 | -2.10470700 | 0.94167200  |
| C | -3.24972500 | -1.32174600 | 0.01286100  |
| H | 2.09683500  | 4.62129200  | 0.11352100  |
| H | 0.47350800  | 4.54973400  | 1.99860000  |
| H | -0.03707900 | 2.39697800  | 3.12485400  |
| H | 0.92065600  | 0.27449000  | 2.27113900  |
| H | 3.60929100  | -0.01668500 | 1.02293400  |
| H | 3.30950500  | 0.33924800  | -1.94140800 |
| H | 4.76218400  | 0.53645000  | -0.97674500 |
| H | 3.15551300  | 2.70026500  | -1.95125000 |
| H | 4.33908900  | 2.85402700  | -0.66703400 |
| H | 1.02013100  | -3.30448800 | 0.95107900  |
| H | 2.12129100  | -2.61077300 | 2.16124400  |
| H | 2.50364900  | -4.17162200 | 1.41108600  |
| H | 1.74586000  | -3.36627500 | -1.53771200 |
| H | 3.20919300  | -4.24905100 | -1.05706400 |
| H | 3.35042900  | -2.74266200 | -1.98209900 |
| H | 4.43076800  | -1.86686400 | 1.51249100  |

|   |             |             |             |
|---|-------------|-------------|-------------|
| H | 4.89742000  | -1.76577800 | -0.20148800 |
| H | 4.73926500  | -3.33509400 | 0.59125500  |
| H | -0.87373800 | 1.97119800  | -0.51051200 |
| H | -1.18452500 | 0.46482600  | 0.34812300  |
| H | -1.61918100 | -0.65141000 | -1.90937800 |
| H | -1.53249700 | 0.93272400  | -2.65797800 |
| H | -3.04530800 | 2.46603400  | -2.44565300 |
| H | -3.68335700 | 2.63318500  | -0.79552900 |
| H | -4.69920300 | 1.96607400  | -2.08962700 |
| H | -5.56012600 | 1.16594200  | -0.29244200 |
| H | -6.72306300 | -0.23252700 | 1.32975000  |
| H | -5.70197500 | -2.35357900 | 2.15290800  |
| H | -3.45526000 | -3.01739800 | 1.29425900  |
| H | -2.26772400 | -1.63963400 | -0.31491700 |
| H | 1.05909400  | 0.87284200  | -1.72439300 |

**cis-init\_2**

|   |            |             |             |
|---|------------|-------------|-------------|
| C | 1.40682300 | 3.67089600  | 0.39128100  |
| C | 0.81183300 | 3.73487400  | 1.67450600  |
| C | 0.71077300 | 2.55613500  | 2.46031700  |
| C | 1.06127200 | 1.33632700  | 1.95758400  |
| C | 1.41423500 | 1.16633800  | 0.50924800  |
| C | 1.75396900 | 2.46809300  | -0.15845600 |
| C | 2.65560300 | 0.27124800  | 0.22443200  |
| C | 3.26155300 | 0.81333500  | -1.10619300 |
| C | 2.66043200 | 2.22957500  | -1.33874200 |
| N | 2.12393800 | -1.08689700 | 0.15176500  |

|   |             |             |             |
|---|-------------|-------------|-------------|
| C | 2.95957300  | -2.32084300 | 0.15596500  |
| C | 2.35105100  | -3.32765300 | 1.14766900  |
| C | 3.00085400  | -2.91679900 | -1.26244500 |
| C | 4.38394800  | -1.98139900 | 0.61311500  |
| C | 0.79444900  | -1.09951800 | -0.16804000 |
| O | 0.13291100  | -2.09802400 | -0.45448500 |
| C | 0.25078700  | 0.32463800  | -0.15964400 |
| C | -0.21579600 | 0.74947000  | -1.56210800 |
| C | -1.60759800 | 0.19450700  | -1.89664600 |
| N | -2.63856700 | 0.72192400  | -1.00524100 |
| C | -3.51053200 | -0.14574400 | -0.33065800 |
| C | -3.11163600 | 2.04722800  | -1.35218100 |
| C | -4.83658600 | 0.23076600  | -0.04185800 |
| C | -5.67942100 | -0.61870400 | 0.67469500  |
| C | -5.23756500 | -1.86416000 | 1.11278400  |
| C | -3.92433000 | -2.24435000 | 0.82592100  |
| C | -3.06610600 | -1.40638200 | 0.12286900  |
| H | 1.65735000  | 4.59424800  | -0.12645500 |
| H | 3.37537200  | 0.35646900  | 1.03937800  |
| H | 2.99512800  | 0.13716700  | -1.92211500 |
| H | 4.35313200  | 0.84375100  | -1.05931500 |
| H | 2.11161100  | 2.25844300  | -2.28841200 |
| H | 3.43142000  | 3.00383800  | -1.40504600 |
| H | 1.33989700  | -3.60135600 | 0.84903200  |
| H | 2.31735900  | -2.89454900 | 2.15224900  |
| H | 2.96899100  | -4.23016200 | 1.18279800  |
| H | 1.99014800  | -3.13416600 | -1.60983300 |

|   |             |             |             |
|---|-------------|-------------|-------------|
| H | 3.58012700  | -3.84545400 | -1.26262200 |
| H | 3.47642700  | -2.22113500 | -1.96081100 |
| H | 4.39787700  | -1.57723100 | 1.62943500  |
| H | 4.87551300  | -1.26949100 | -0.05552800 |
| H | 4.97738100  | -2.89940000 | 0.61243100  |
| H | 0.49099200  | 0.41859900  | -2.33236000 |
| H | -0.23920300 | 1.84335600  | -1.60168100 |
| H | -1.58876300 | -0.89182900 | -1.83051700 |
| H | -1.85365600 | 0.44842200  | -2.93969400 |
| H | -2.27311500 | 2.64108200  | -1.72189400 |
| H | -3.51110200 | 2.55576400  | -0.47068000 |
| H | -3.89245500 | 2.03950300  | -2.13160100 |
| H | -5.22409500 | 1.18204400  | -0.38411100 |
| H | -6.69730000 | -0.29817200 | 0.87924400  |
| H | -5.89785400 | -2.52347600 | 1.66688500  |
| H | -3.55139800 | -3.20740700 | 1.16345900  |
| H | -2.04494900 | -1.72637400 | -0.05266900 |
| H | 0.98826000  | 0.43622400  | 2.56264700  |
| H | 0.52334600  | 4.69284400  | 2.09311200  |
| H | 0.36804700  | 2.63568300  | 3.48818400  |
| H | -0.63088500 | 0.36450500  | 0.48622600  |

**trans-init\_2**

|   |            |            |            |
|---|------------|------------|------------|
| C | 2.12436500 | 3.61037100 | 0.38516600 |
| C | 1.38411900 | 3.72929600 | 1.58899500 |
| C | 0.95368100 | 2.56035800 | 2.27057300 |
| C | 1.13991800 | 1.31530500 | 1.74067800 |

|   |             |             |             |
|---|-------------|-------------|-------------|
| C | 1.70573300  | 1.13824400  | 0.36657000  |
| C | 2.32540500  | 2.38719300  | -0.18674500 |
| C | 2.84252100  | 0.07497700  | 0.25036700  |
| C | 3.77794900  | 0.58862700  | -0.89221400 |
| C | 3.27422800  | 2.00878600  | -1.29109600 |
| N | 2.14479400  | -1.18200600 | -0.01027500 |
| C | 2.75029700  | -2.53631300 | 0.13314100  |
| C | 1.89388600  | -3.36282000 | 1.10808700  |
| C | 2.80459600  | -3.21165200 | -1.24846500 |
| C | 4.17270800  | -2.41742200 | 0.69557200  |
| C | 0.88014000  | -0.98573100 | -0.49012400 |
| O | 0.07998700  | -1.86549500 | -0.80386300 |
| C | 0.63078200  | 0.51753400  | -0.60543800 |
| C | -0.81674500 | 0.93995100  | -0.37104300 |
| C | -1.72848600 | 0.58339500  | -1.55698100 |
| N | -3.14106000 | 0.82582400  | -1.30229900 |
| C | -3.83552000 | -0.02545600 | -0.44096100 |
| C | -3.60456800 | 2.19234500  | -1.45383600 |
| C | -5.10775000 | 0.32896600  | 0.05697800  |
| C | -5.82030200 | -0.53807200 | 0.88197200  |
| C | -5.29442600 | -1.77438400 | 1.25146700  |
| C | -4.02935500 | -2.12517000 | 0.77780300  |
| C | -3.30205900 | -1.27492100 | -0.04891600 |
| H | 2.58394400  | 4.49508300  | -0.04935300 |
| H | 3.39110900  | 0.01035300  | 1.19042200  |
| H | 3.75489700  | -0.10168500 | -1.73862800 |
| H | 4.81122000  | 0.63371100  | -0.53806600 |

|   |             |             |             |
|---|-------------|-------------|-------------|
| H | 2.76047500  | 1.96537800  | -2.26133400 |
| H | 4.08695200  | 2.73197900  | -1.40286300 |
| H | 0.87763400  | -3.46950600 | 0.72954400  |
| H | 1.85648700  | -2.87384300 | 2.08675400  |
| H | 2.33199500  | -4.35735300 | 1.23773700  |
| H | 1.80408100  | -3.28588200 | -1.67545700 |
| H | 3.22357000  | -4.21853100 | -1.15681200 |
| H | 3.44074200  | -2.63900700 | -1.93099500 |
| H | 4.18085400  | -1.98960700 | 1.70194000  |
| H | 4.82196300  | -1.81667900 | 0.05274700  |
| H | 4.60461200  | -3.41952400 | 0.75973200  |
| H | -0.84727900 | 2.02090700  | -0.19438100 |
| H | -1.20321000 | 0.46085300  | 0.53261300  |
| H | -1.58000000 | -0.46149300 | -1.83081300 |
| H | -1.44092200 | 1.17829900  | -2.43160800 |
| H | -2.93439900 | 2.71768800  | -2.13685500 |
| H | -3.63465700 | 2.74962000  | -0.50419700 |
| H | -4.60894200 | 2.22018700  | -1.89040500 |
| H | -5.54938100 | 1.28328700  | -0.19999900 |
| H | -6.79918500 | -0.23282200 | 1.24168400  |
| H | -5.85184800 | -2.44453400 | 1.89774600  |
| H | -3.58897800 | -3.07799800 | 1.05856300  |
| H | -2.31680500 | -1.58496600 | -0.37415500 |
| H | 0.81706600  | 0.42563300  | 2.27450300  |
| H | 1.21798700  | 4.70602700  | 2.02986900  |
| H | 0.48477200  | 2.66341800  | 3.24530900  |
| H | 0.91250300  | 0.78780100  | -1.63363100 |



## VIII. Crystallographic data

The crystal data was collected on a Agilent Gemini E diffractometer (Mo, 50kV 40 mA) and reduced by CrysAlisPro (Rigaku). The structures were solved by direct methods using SHELXS-97.

Refinements were performed with SHELXL-2013 using full matrix least-squares calculations on F<sup>2</sup>, with anisotropic displacement parameters for all the nonhydrogen atoms.



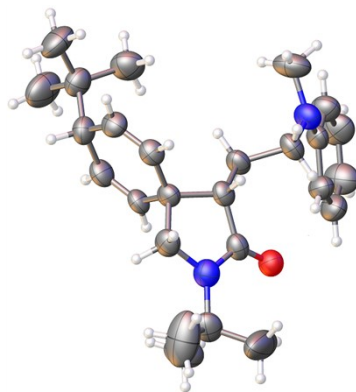

X-ray crystallographic data for **3-2** (CCDC 2310087)

### Crystal data and structure refinement

|                                        |                                                  |
|----------------------------------------|--------------------------------------------------|
| Identification code                    | exp_13794_auto                                   |
| Empirical formula                      | C <sub>26</sub> H <sub>38</sub> N <sub>2</sub> O |
| Formula weight                         | 394.58                                           |
| Temperature/K                          | 293(2)                                           |
| Crystal system                         | monoclinic                                       |
| Space group                            | P2 <sub>1</sub> /c                               |
| a/Å                                    | 21.1618(17)                                      |
| b/Å                                    | 12.6995(9)                                       |
| c/Å                                    | 18.3176(14)                                      |
| $\alpha$ /°                            | 90                                               |
| $\beta$ /°                             | 100.330(8)                                       |
| $\gamma$ /°                            | 90                                               |
| Volume/Å <sup>3</sup>                  | 4843.0(6)                                        |
| Z                                      | 8                                                |
| $\rho_{\text{calc}}/\text{cm}^3$       | 1.082                                            |
| $\mu/\text{mm}^{-1}$                   | 0.065                                            |
| F(000)                                 | 1728.0                                           |
| Crystal size/mm <sup>3</sup>           | 0.18 × 0.12 × 0.07                               |
| Radiation                              | Mo K $\alpha$ ( $\lambda$ = 0.71073)             |
| 2 $\theta$ range for data collection/° | 4.562 to 48.996                                  |

|                                                |                                                               |
|------------------------------------------------|---------------------------------------------------------------|
| Index ranges                                   | $-24 \leq h \leq 21, -9 \leq k \leq 14, -21 \leq l \leq 21$   |
| Reflections collected                          | 18399                                                         |
| Independent reflections                        | 7997 [ $R_{\text{int}} = 0.0542, R_{\text{sigma}} = 0.1373$ ] |
| Data/restraints/parameters                     | 7997/17/519                                                   |
| Goodness-of-fit on $F^2$                       | 0.955                                                         |
| Final R indexes [ $I \geq 2\sigma(I)$ ]        | $R_1 = 0.0908, wR_2 = 0.2398$                                 |
| Final R indexes [all data]                     | $R_1 = 0.1890, wR_2 = 0.3041$                                 |
| Largest diff. peak/hole / $e \text{ \AA}^{-3}$ | 0.74/-0.59                                                    |

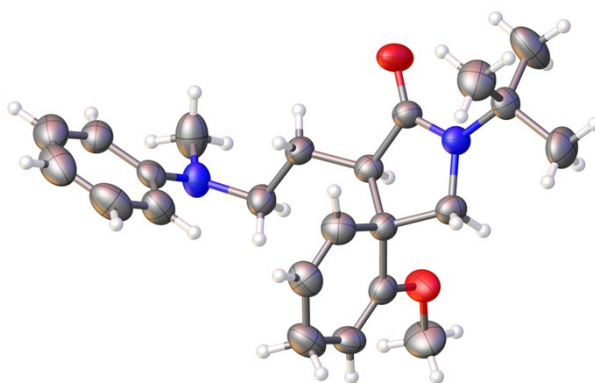

X-ray crystallographic data for **3-3-major** (CCDC 2189219)

### Crystal data and structure refinement

|                     |                      |
|---------------------|----------------------|
| Identification code | exp_11661            |
| Empirical formula   | $C_{23}H_{32}N_2O_2$ |
| Formula weight      | 368.50               |
| Temperature/K       | 293(2)               |
| Crystal system      | monoclinic           |
| Space group         | $P2_1/n$             |
| $a/\text{\AA}$      | 13.8978(19)          |
| $b/\text{\AA}$      | 9.9999(9)            |
| $c/\text{\AA}$      | 14.9001(18)          |
| $\alpha/^\circ$     | 90                   |
| $\beta/^\circ$      | 93.852(13)           |
| $\gamma/^\circ$     | 90                   |

S64

|                                             |                                                                  |
|---------------------------------------------|------------------------------------------------------------------|
| Volume/Å <sup>3</sup>                       | 2066.1(4)                                                        |
| Z                                           | 4                                                                |
| $\rho_{\text{calc}}/\text{cm}^3$            | 1.185                                                            |
| $\mu/\text{mm}^{-1}$                        | 0.075                                                            |
| F(000)                                      | 800.0                                                            |
| Crystal size/mm <sup>3</sup>                | 0.2 × 0.18 × 0.12                                                |
| Radiation                                   | Mo K $\alpha$ ( $\lambda = 0.71073$ )                            |
| 2 $\Theta$ range for data collection/°      | 4.15 to 48.998                                                   |
| Index ranges                                | -16 ≤ h ≤ 15, -11 ≤ k ≤ 8, -13 ≤ l ≤ 17                          |
| Reflections collected                       | 7792                                                             |
| Independent reflections                     | 3424 [ $R_{\text{int}} = 0.0316$ , $R_{\text{sigma}} = 0.0529$ ] |
| Data/restraints/parameters                  | 3424/0/249                                                       |
| Goodness-of-fit on F <sup>2</sup>           | 1.084                                                            |
| Final R indexes [ $I \geq 2\sigma(I)$ ]     | $R_1 = 0.0668$ , $wR_2 = 0.1217$                                 |
| Final R indexes [all data]                  | $R_1 = 0.1093$ , $wR_2 = 0.1404$                                 |
| Largest diff. peak/hole / e Å <sup>-3</sup> | 0.17/-0.15                                                       |

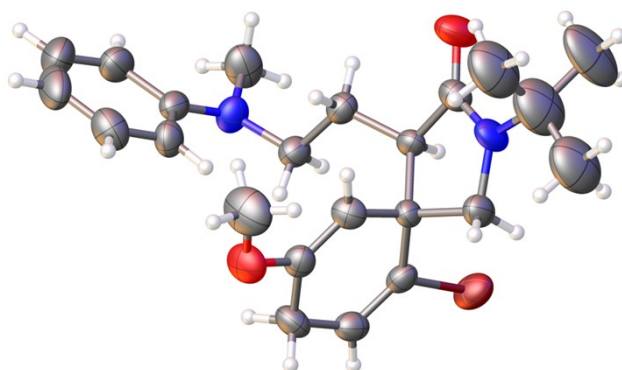

X-ray crystallographic data for **3-4** (CCDC 2141716)

### Crystal data and structure refinement

|                     |                                                                 |
|---------------------|-----------------------------------------------------------------|
| Identification code | exp_10035                                                       |
| Empirical formula   | C <sub>23</sub> H <sub>31</sub> BrN <sub>2</sub> O <sub>2</sub> |
| Formula weight      | 446.40                                                          |

|                                             |                                                                |
|---------------------------------------------|----------------------------------------------------------------|
| Temperature/K                               | 293(2)                                                         |
| Crystal system                              | monoclinic                                                     |
| Space group                                 | P2 <sub>1</sub> /c                                             |
| a/Å                                         | 14.2363(17)                                                    |
| b/Å                                         | 12.6108(8)                                                     |
| c/Å                                         | 13.0773(13)                                                    |
| $\alpha$ /°                                 | 90                                                             |
| $\beta$ /°                                  | 104.172(11)                                                    |
| $\gamma$ /°                                 | 90                                                             |
| Volume/Å <sup>3</sup>                       | 2276.3(4)                                                      |
| Z                                           | 4                                                              |
| $\rho_{\text{calc}}$ /g/cm <sup>3</sup>     | 1.303                                                          |
| $\mu$ /mm <sup>-1</sup>                     | 1.825                                                          |
| F(000)                                      | 932.0                                                          |
| Crystal size/mm <sup>3</sup>                | 0.28 × 0.2 × 0.12                                              |
| Radiation                                   | Mo K $\alpha$ ( $\lambda$ = 0.71073)                           |
| 2 $\Theta$ range for data collection/°      | 4.374 to 49                                                    |
| Index ranges                                | -16 ≤ h ≤ 16, -14 ≤ k ≤ 11, -10 ≤ l ≤ 15                       |
| Reflections collected                       | 9067                                                           |
| Independent reflections                     | 3741 [ $R_{\text{int}}$ = 0.0420, $R_{\text{sigma}}$ = 0.0689] |
| Data/restraints/parameters                  | 3741/1/246                                                     |
| Goodness-of-fit on F <sup>2</sup>           | 1.025                                                          |
| Final R indexes [ $I \geq 2\sigma(I)$ ]     | $R_1$ = 0.0637, $wR_2$ = 0.1401                                |
| Final R indexes [all data]                  | $R_1$ = 0.1029, $wR_2$ = 0.1619                                |
| Largest diff. peak/hole / e Å <sup>-3</sup> | 1.30/-0.86                                                     |

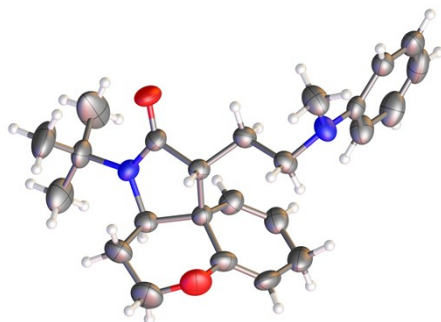

X-ray crystallographic data for **3-28** (2182835)

### Crystal data and structure refinement

|                                        |                                                               |
|----------------------------------------|---------------------------------------------------------------|
| Identification code                    | exp_10391                                                     |
| Empirical formula                      | C <sub>24</sub> H <sub>32</sub> N <sub>2</sub> O <sub>2</sub> |
| Formula weight                         | 380.51                                                        |
| Temperature/K                          | 293(2)                                                        |
| Crystal system                         | monoclinic                                                    |
| Space group                            | P2 <sub>1</sub> /c                                            |
| a/Å                                    | 13.2226(17)                                                   |
| b/Å                                    | 13.177(2)                                                     |
| c/Å                                    | 12.2423(16)                                                   |
| $\alpha$ /°                            | 90                                                            |
| $\beta$ /°                             | 91.432(11)                                                    |
| $\gamma$ /°                            | 90                                                            |
| Volume/Å <sup>3</sup>                  | 2132.3(5)                                                     |
| Z                                      | 4                                                             |
| $\rho_{\text{calc}}$ /cm <sup>3</sup>  | 1.185                                                         |
| $\mu$ /mm <sup>-1</sup>                | 0.075                                                         |
| F(000)                                 | 824.0                                                         |
| Crystal size/mm <sup>3</sup>           | 0.22 × 0.14 × 0.12                                            |
| Radiation                              | Mo K $\alpha$ ( $\lambda$ = 0.71073)                          |
| 2 $\theta$ range for data collection/° | 4.364 to 53.998                                               |

|                                             |                                                               |
|---------------------------------------------|---------------------------------------------------------------|
| Index ranges                                | -16 ≤ h ≤ 12, -16 ≤ k ≤ 15, -13 ≤ l ≤ 15                      |
| Reflections collected                       | 10492                                                         |
| Independent reflections                     | 4595 [R <sub>int</sub> = 0.0505, R <sub>sigma</sub> = 0.0973] |
| Data/restraints/parameters                  | 4595/0/257                                                    |
| Goodness-of-fit on F <sup>2</sup>           | 1.041                                                         |
| Final R indexes [I ≥ 2σ (I)]                | R <sub>1</sub> = 0.0774, wR <sub>2</sub> = 0.1225             |
| Final R indexes [all data]                  | R <sub>1</sub> = 0.1705, wR <sub>2</sub> = 0.1572             |
| Largest diff. peak/hole / e Å <sup>-3</sup> | 0.16/-0.18                                                    |

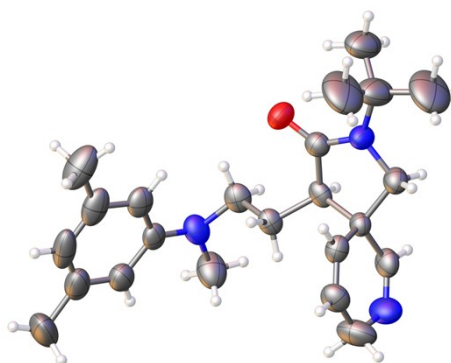

X-ray crystallographic data for *trans*-**3-41** (CCDC 2207806)

### Crystal data and structure refinement

|                     |                                                  |
|---------------------|--------------------------------------------------|
| Identification code | exp_11890                                        |
| Empirical formula   | C <sub>23</sub> H <sub>33</sub> N <sub>3</sub> O |
| Formula weight      | 367.52                                           |
| Temperature/K       | 293(2)                                           |
| Crystal system      | monoclinic                                       |
| Space group         | P2 <sub>1</sub> /c                               |
| a/Å                 | 9.9111(8)                                        |
| b/Å                 | 17.4811(13)                                      |
| c/Å                 | 12.6792(13)                                      |
| α/°                 | 90                                               |
| β/°                 | 95.028(9)                                        |
| γ/°                 | 90                                               |

|                                             |                                                                  |
|---------------------------------------------|------------------------------------------------------------------|
| Volume/Å <sup>3</sup>                       | 2188.3(3)                                                        |
| Z                                           | 4                                                                |
| $\rho_{\text{calc}}/\text{g}/\text{cm}^3$   | 1.116                                                            |
| $\mu/\text{mm}^{-1}$                        | 0.069                                                            |
| F(000)                                      | 800.0                                                            |
| Crystal size/mm <sup>3</sup>                | 0.31 × 0.18 × 0.11                                               |
| Radiation                                   | Mo K $\alpha$ ( $\lambda = 0.71073$ )                            |
| 2 $\Theta$ range for data collection/°      | 3.978 to 49.996                                                  |
| Index ranges                                | -11 ≤ h ≤ 11, -15 ≤ k ≤ 20, -15 ≤ l ≤ 14                         |
| Reflections collected                       | 9602                                                             |
| Independent reflections                     | 3802 [ $R_{\text{int}} = 0.0425$ , $R_{\text{sigma}} = 0.0734$ ] |
| Data/restraints/parameters                  | 3802/0/238                                                       |
| Goodness-of-fit on F <sup>2</sup>           | 1.034                                                            |
| Final R indexes [ $I \geq 2\sigma(I)$ ]     | $R_1 = 0.0993$ , $wR_2 = 0.2205$                                 |
| Final R indexes [all data]                  | $R_1 = 0.1693$ , $wR_2 = 0.2649$                                 |
| Largest diff. peak/hole / e Å <sup>-3</sup> | 0.53/-0.58                                                       |

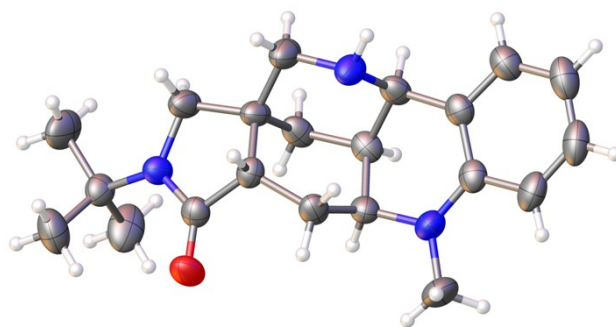

X-ray crystallographic data for **4-1** (CCDC 2207807)

### Crystal data and structure refinement

|                     |                                                  |
|---------------------|--------------------------------------------------|
| Identification code | exp_11891                                        |
| Empirical formula   | C <sub>21</sub> H <sub>29</sub> N <sub>3</sub> O |
| Formula weight      | 339.47                                           |
| Temperature/K       | 293(2)                                           |

|                                             |                                                               |
|---------------------------------------------|---------------------------------------------------------------|
| Crystal system                              | monoclinic                                                    |
| Space group                                 | P2 <sub>1</sub>                                               |
| a/Å                                         | 6.5960(10)                                                    |
| b/Å                                         | 9.6411(12)                                                    |
| c/Å                                         | 14.4759(16)                                                   |
| α/°                                         | 90                                                            |
| β/°                                         | 90.818(13)                                                    |
| γ/°                                         | 90                                                            |
| Volume/Å <sup>3</sup>                       | 920.5(2)                                                      |
| Z                                           | 2                                                             |
| ρ <sub>calc</sub> /cm <sup>3</sup>          | 1.225                                                         |
| μ/mm <sup>-1</sup>                          | 0.076                                                         |
| F(000)                                      | 368.0                                                         |
| Crystal size/mm <sup>3</sup>                | 0.32 × 0.22 × 0.15                                            |
| Radiation                                   | Mo Kα (λ = 0.71073)                                           |
| 2θ range for data collection/°              | 5.076 to 58.878                                               |
| Index ranges                                | -5 ≤ h ≤ 9, -13 ≤ k ≤ 13, -18 ≤ l ≤ 19                        |
| Reflections collected                       | 7820                                                          |
| Independent reflections                     | 4069 [R <sub>int</sub> = 0.0383, R <sub>sigma</sub> = 0.0771] |
| Data/restraints/parameters                  | 4069/1/233                                                    |
| Goodness-of-fit on F <sup>2</sup>           | 1.016                                                         |
| Final R indexes [I ≥ 2σ (I)]                | R <sub>1</sub> = 0.0585, wR <sub>2</sub> = 0.1051             |
| Final R indexes [all data]                  | R <sub>1</sub> = 0.0950, wR <sub>2</sub> = 0.1209             |
| Largest diff. peak/hole / e Å <sup>-3</sup> | 0.20/-0.29                                                    |
| Flack parameter                             | -0.3(10)                                                      |

## IX. Reference

- [1] Elisabeth, S.; Tillmann, G. F.; Kirsten, Z. A toolbox approach to construct broadly applicable metal-free catalysts for photoredox chemistry: Deliberate tuning of redox potentials and importance of halogens in Donor–Acceptor cyanoarenes. *J. Am. Chem. Soc.* **2018**, *140*, 15353-15365.



- [2] Frisch, M.; Trucks, G.; Schlegel, H.; Scuseria, G.; Robb, M.; Cheeseman, J.; Scalmani, G.; Barone, V.; Mennucci, B.; Petersson, G. Gaussian 09, Revision D.01 (Gaussian, Inc.: Wallingford, CT, 2009).
- [3] (a) Becke, A. D. *J. Chem. Phys.* **1993**, 98, 5648. (b) Lee, C.; Yang, W.; Parr, R. G. *Phys. Rev. B: Condens. Matter Mater. Phys.* **1988**, 37, 785. (c) Stephens, P. J.; Devlin, F. J.; Chabalowski, C. F.; Frisch, M. J. *J. Phys. Chem.* **1994**, 98, 11623.
- [4] (a) Grimme, S.; Antony, J.; Ehrlich, S.; Krieg, H. *J. Chem. Phys.* 2010, 132, 154104. (b) Grimme, S.; Ehrlich, S.; Goerigk, L. *J. Comp. Chem.* **2011**, 32, 1456.
- [5] Marenich, A. V.; Cramer, C. J.; Truhlar, D. G. Universal. Solvation Model Based on Solute Electron Density and on a Continuum Model of the Solvent Defined by the Bulk Dielectric Constant and Atomic Surface Tensions. *J. Phys. Chem. B.* **2009**, 113, 6378.
- [6] Humphrey, W.; Dalke, A.; Schulten, K. VMD: Visual molecular dynamics. *J. Mol. Graphics* **1996**, 14, 33.

## X. NMR Spectra

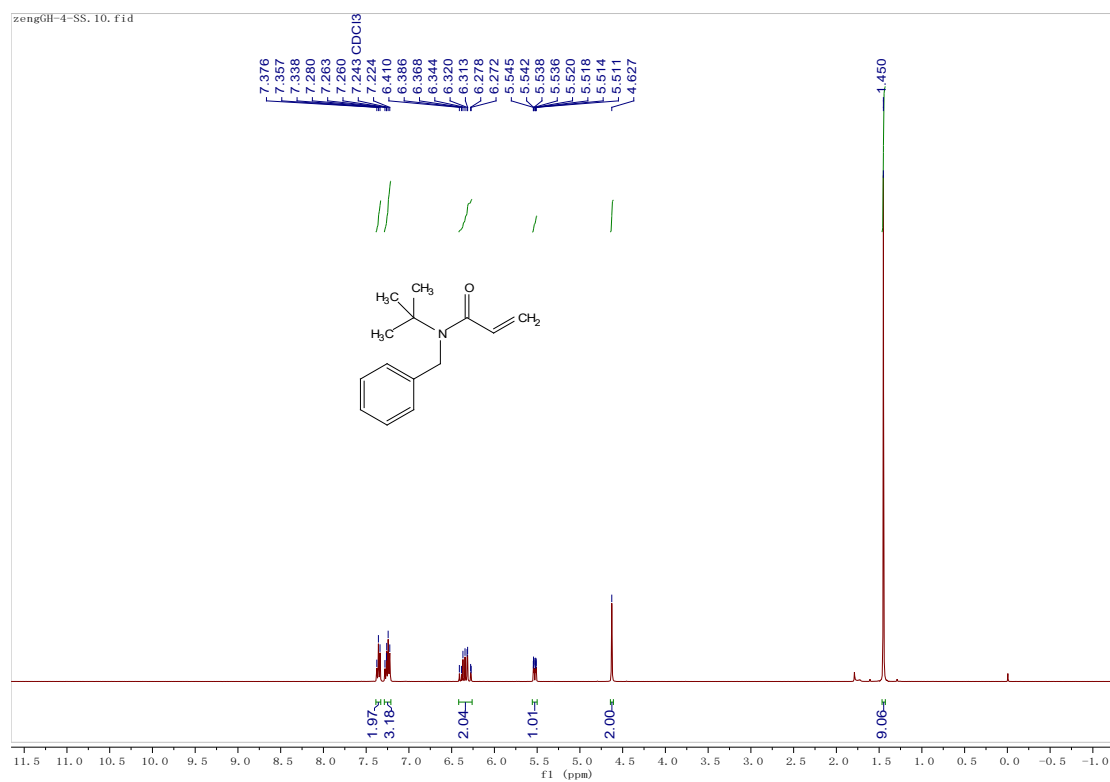

$^1\text{H}$  NMR of **1a**

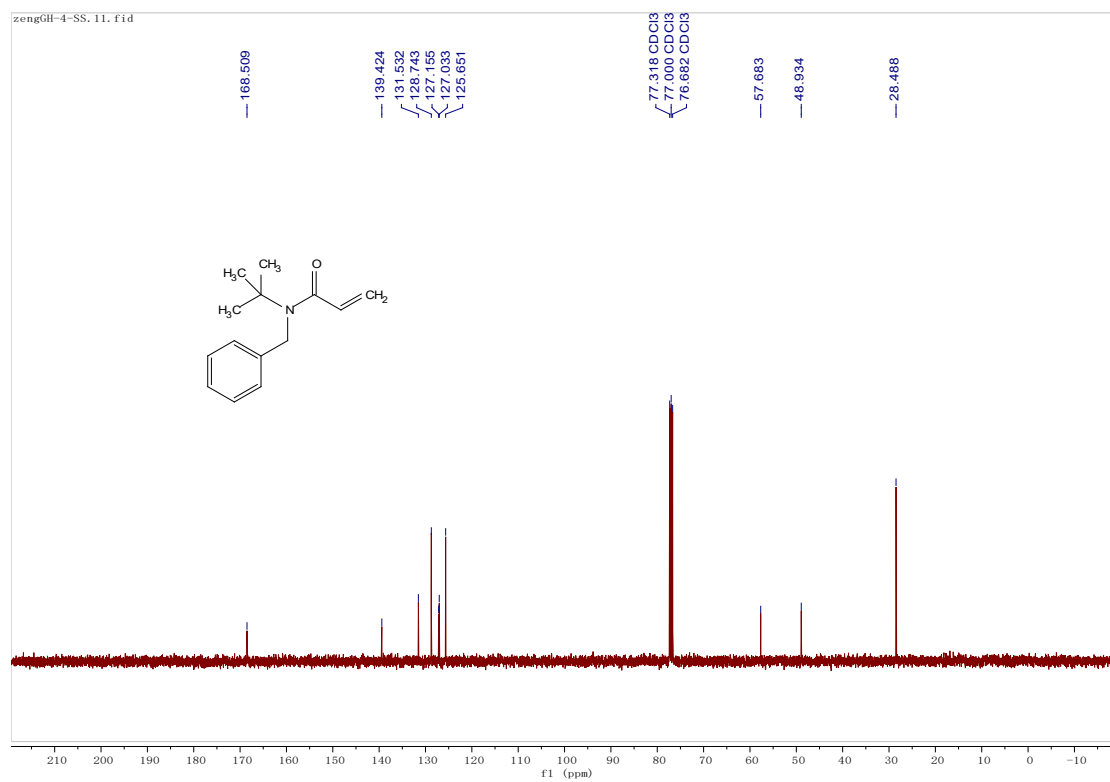

$^{13}\text{C}$  NMR of **1a**

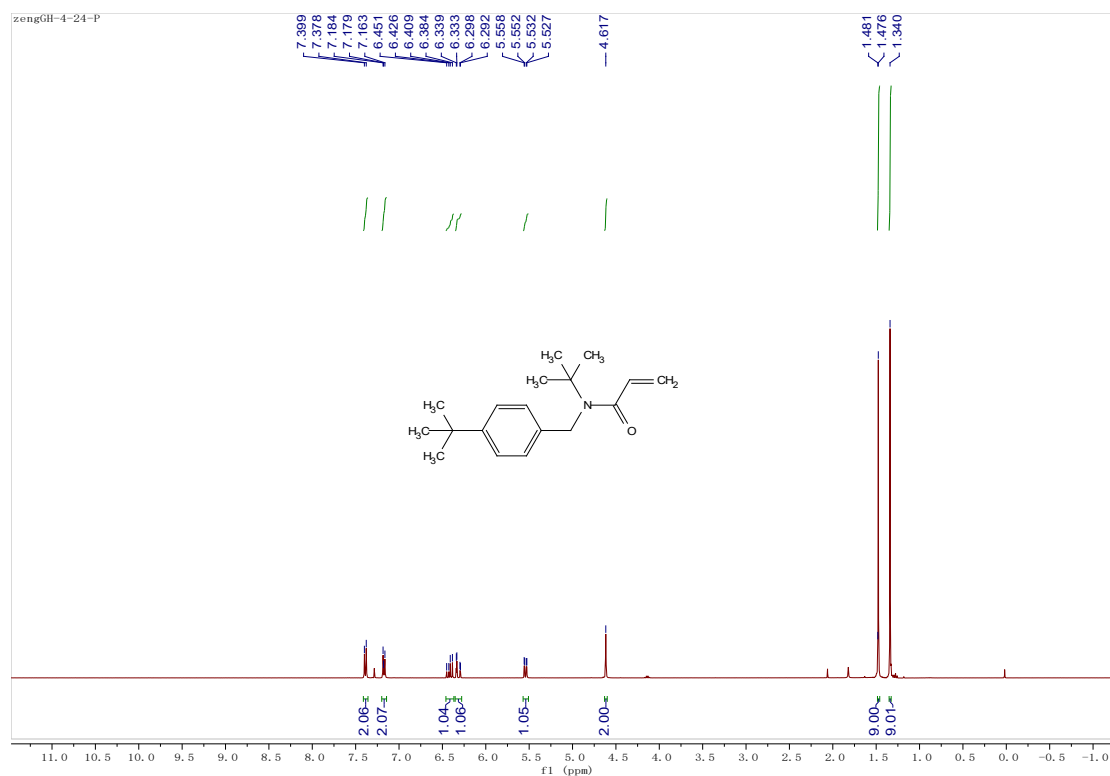

<sup>1</sup>H NMR of **1b**

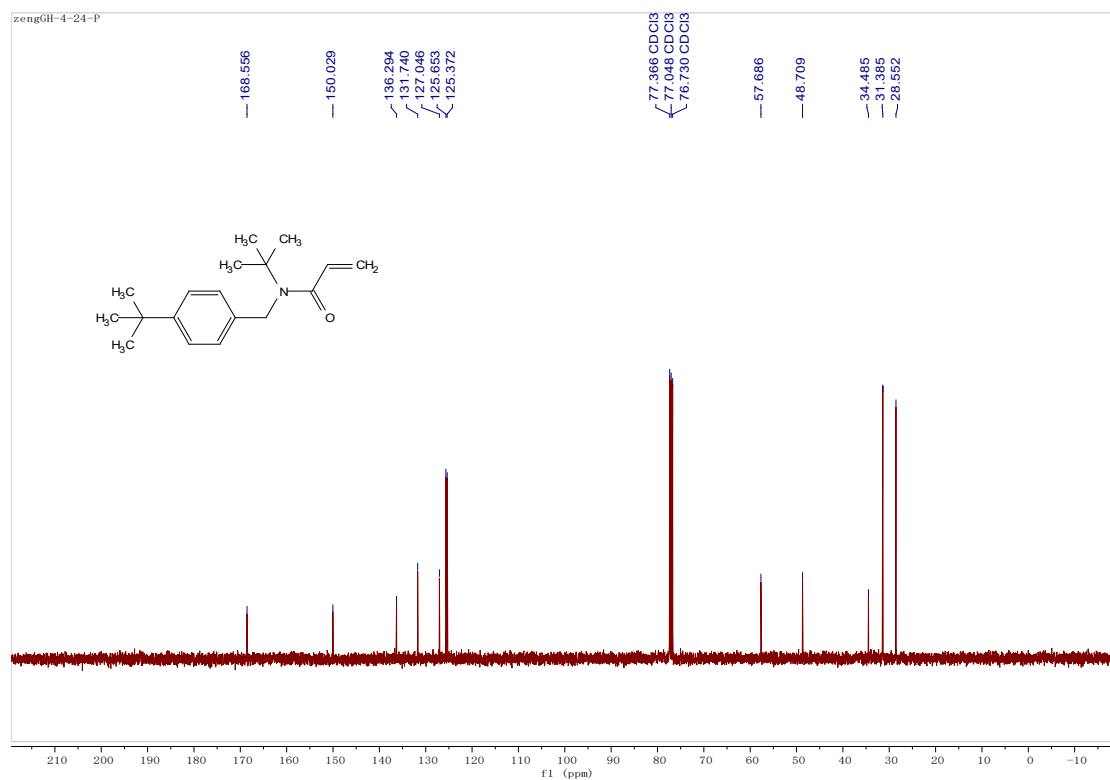

<sup>13</sup>C NMR of **1b**

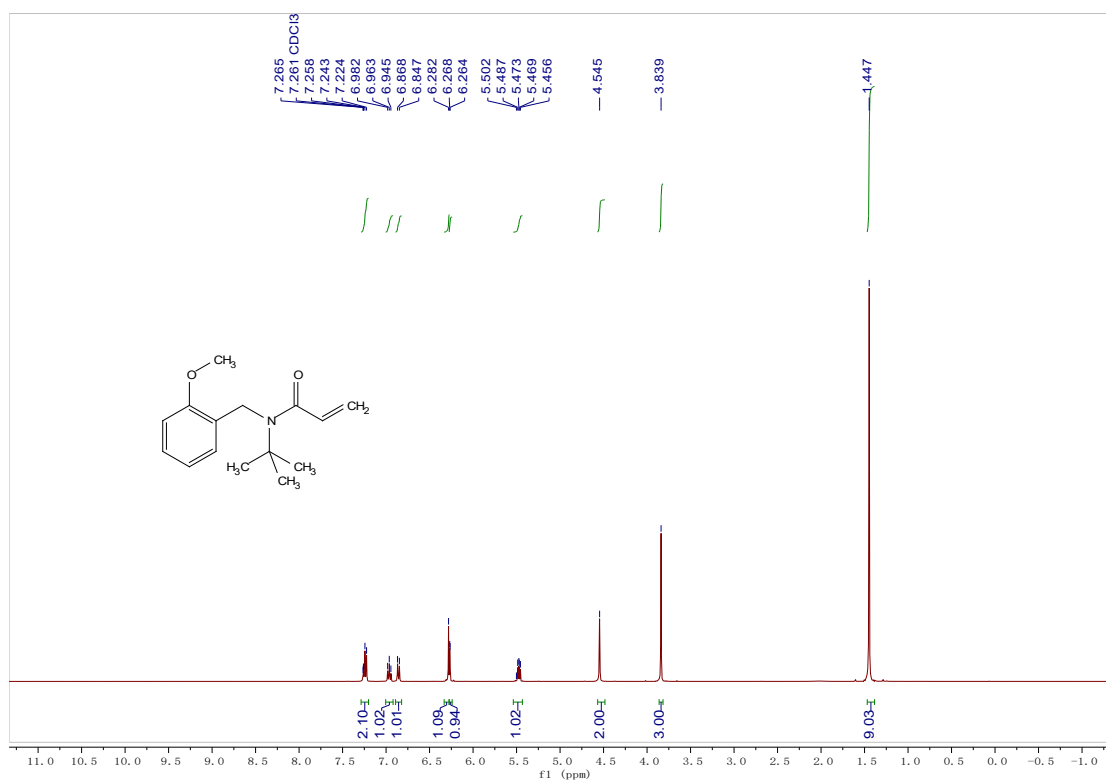

<sup>1</sup>H NMR of **1c**

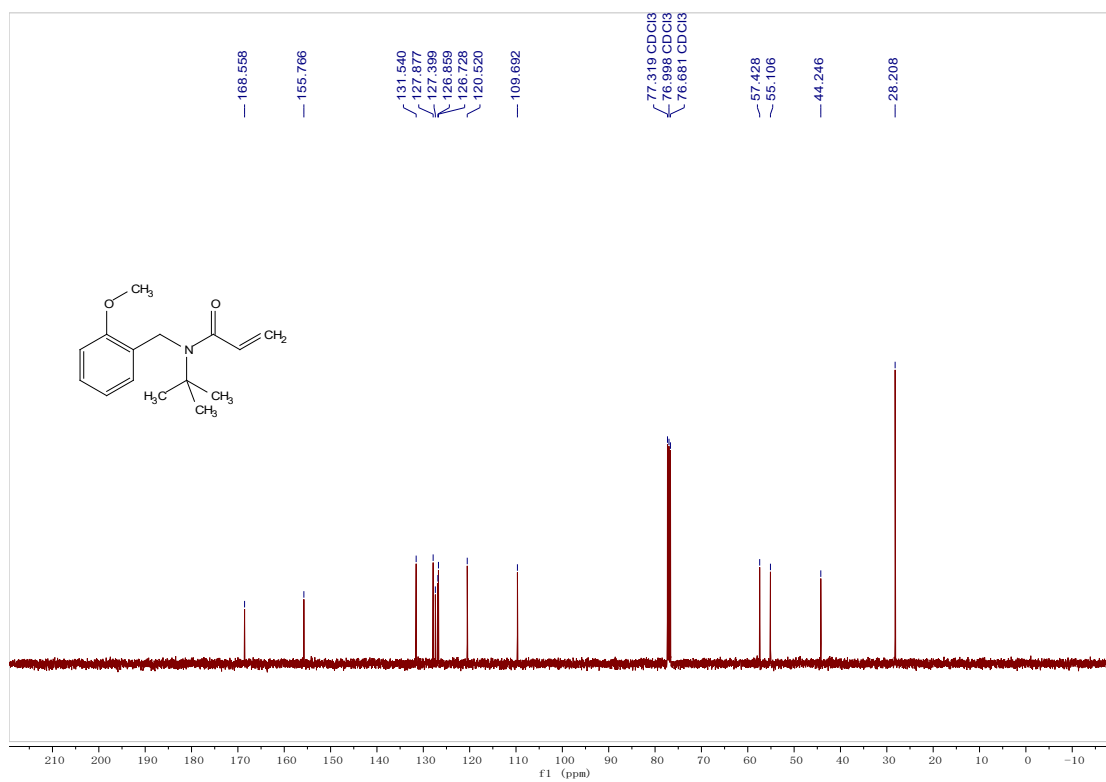

<sup>13</sup>C NMR of **1c**

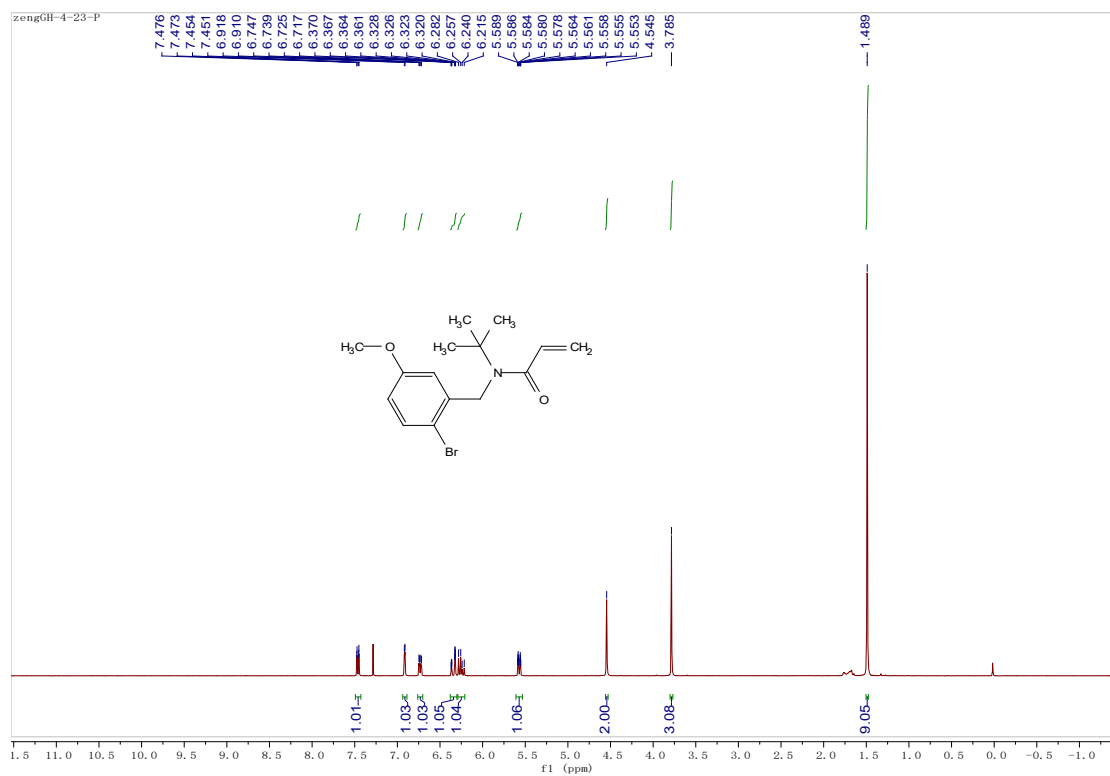

<sup>1</sup>H NMR of **1d**

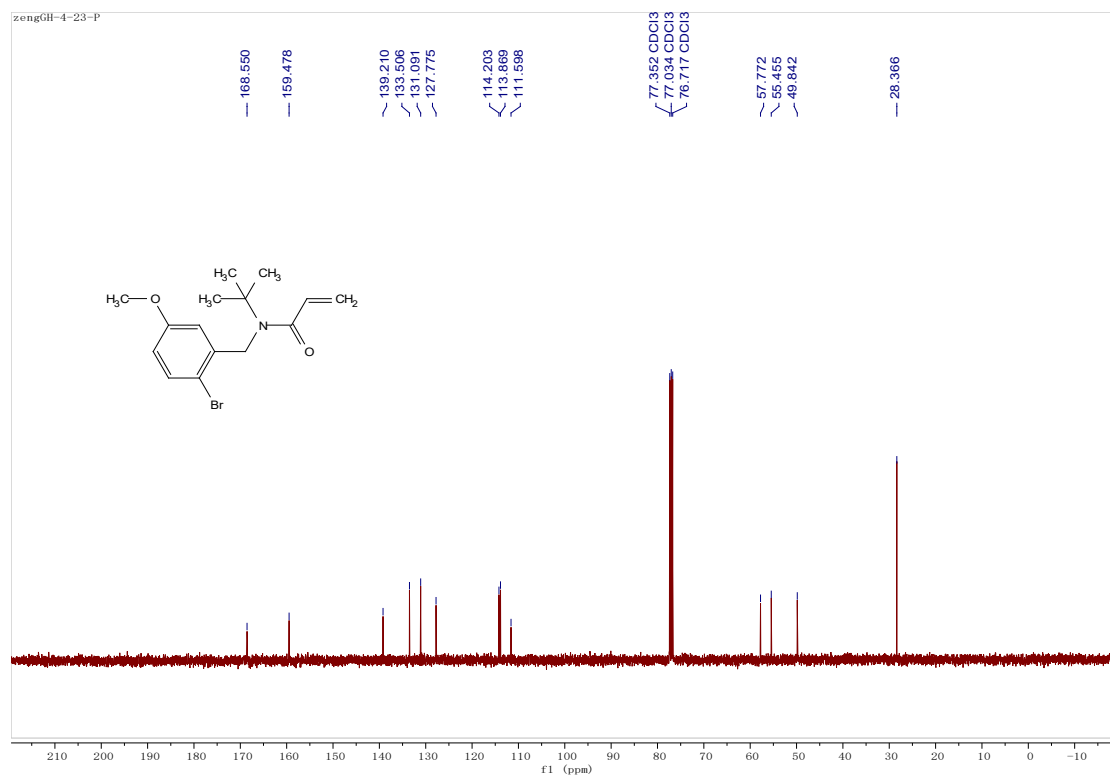

<sup>13</sup>C NMR of **1d**

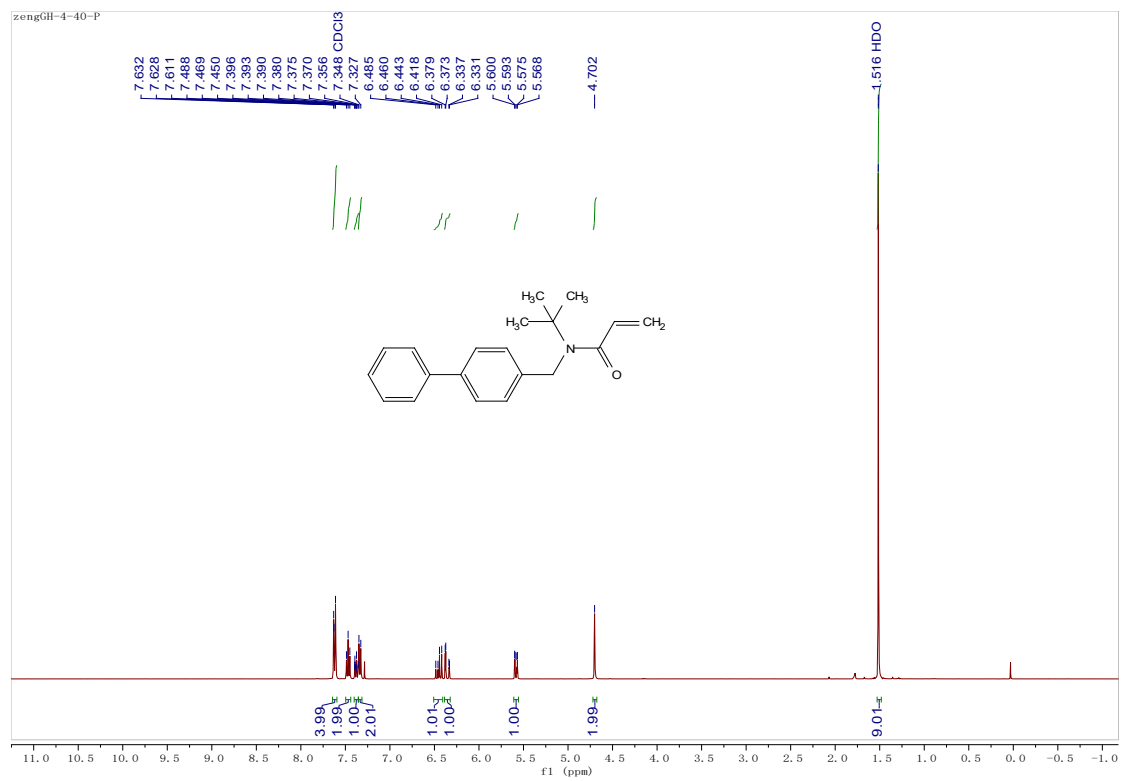

<sup>1</sup>H NMR of **1e**

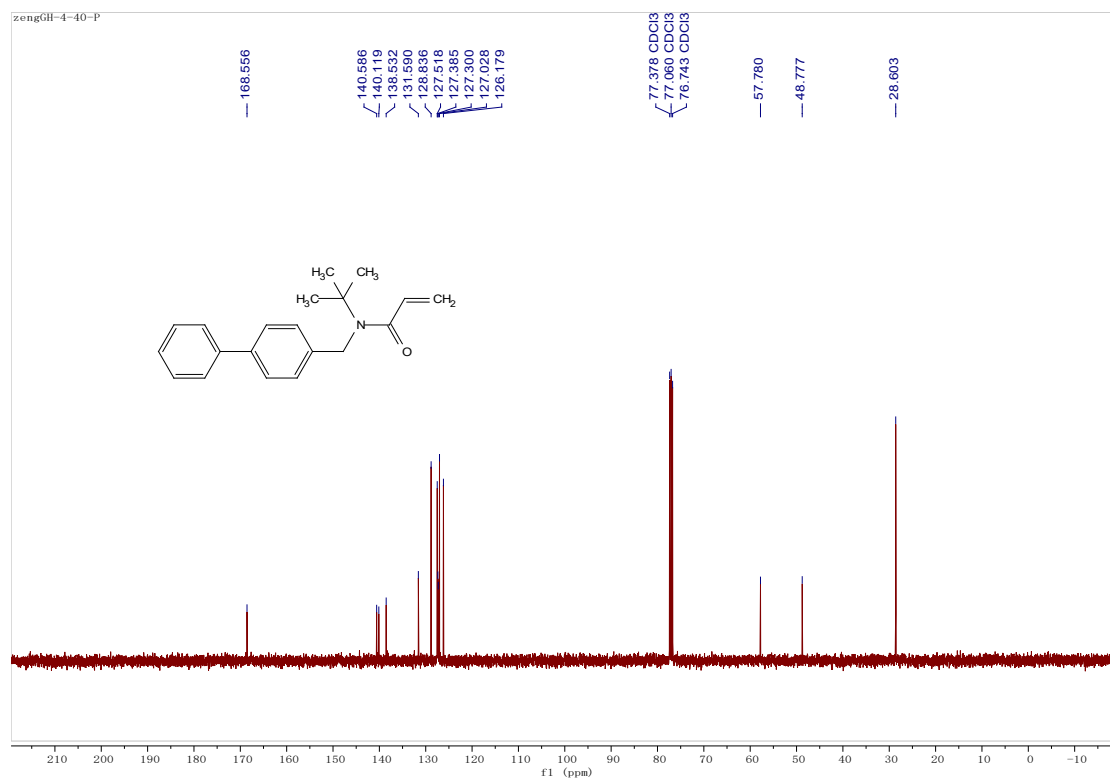

$^{13}\text{C}$  NMR of **1e**

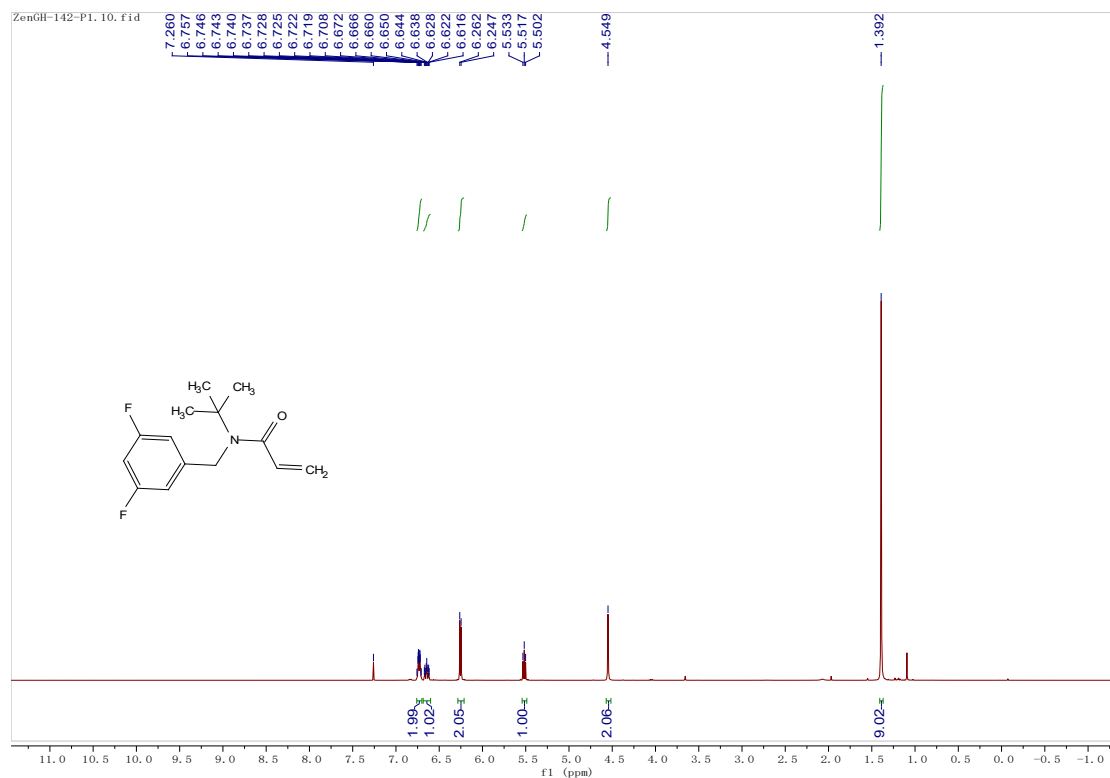

<sup>1</sup>H NMR of **1f**

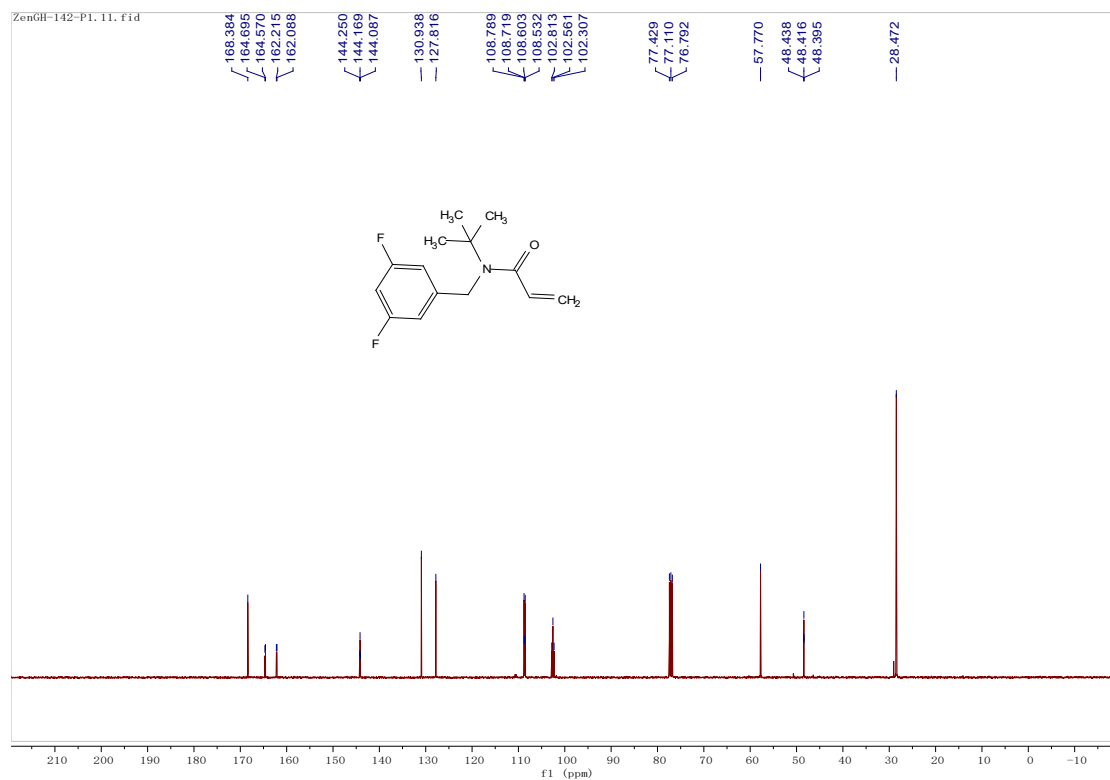

<sup>13</sup>C NMR of **1f**



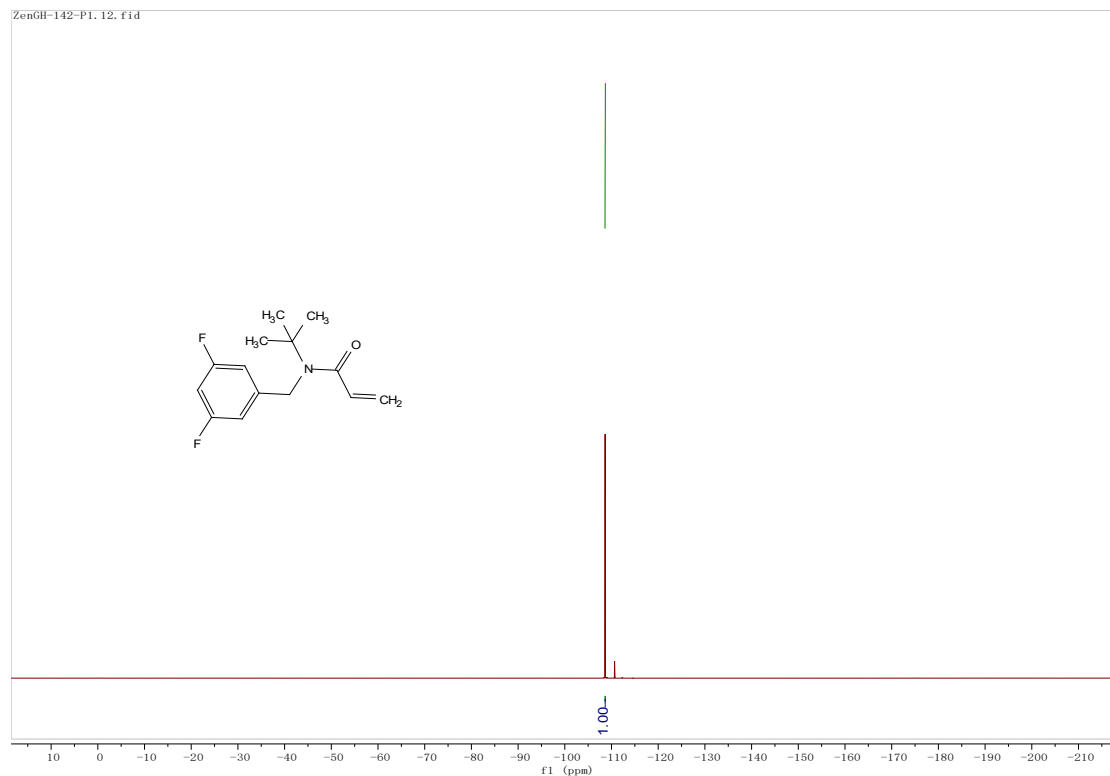

$^{19}\text{F}$  NMR of **1f**

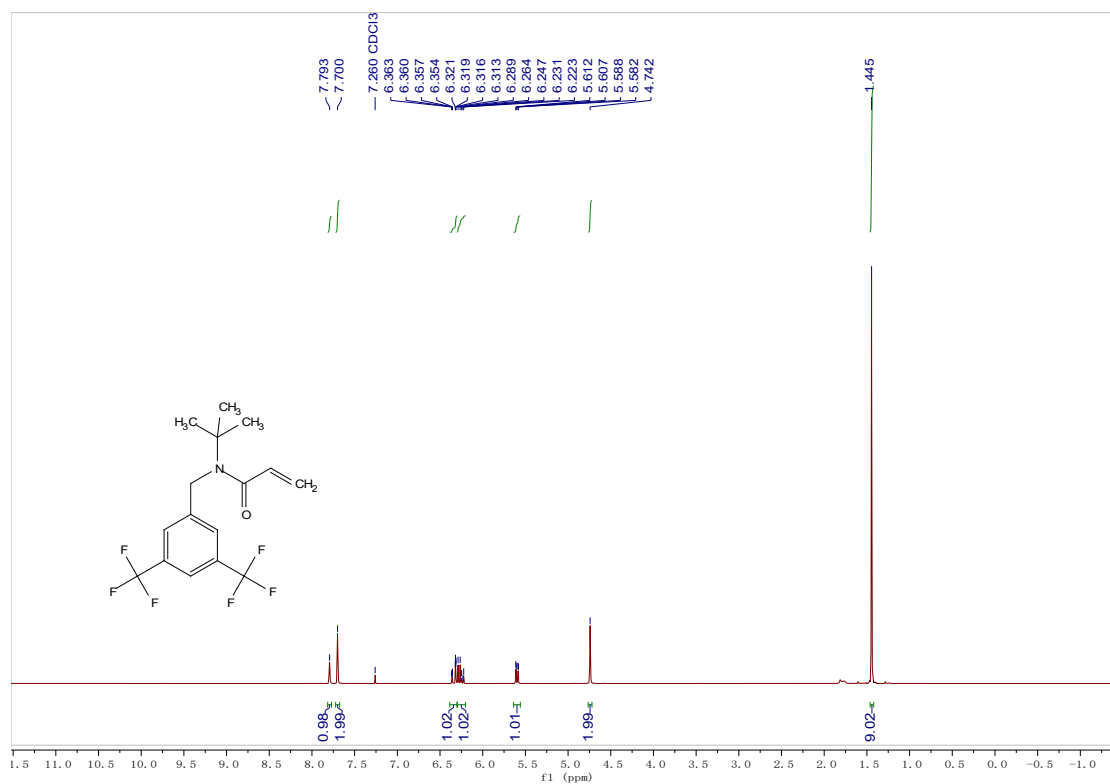

$^1\text{H}$  NMR of **1g**

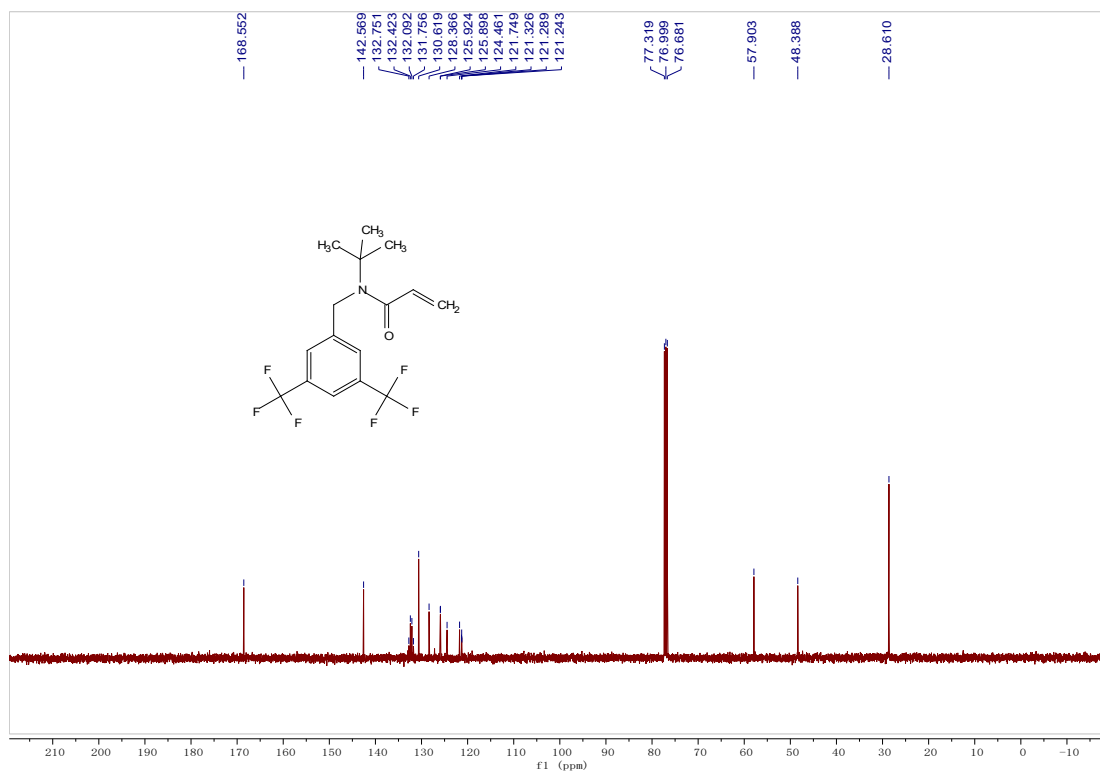

$^{13}\text{C}$  NMR of **1g**

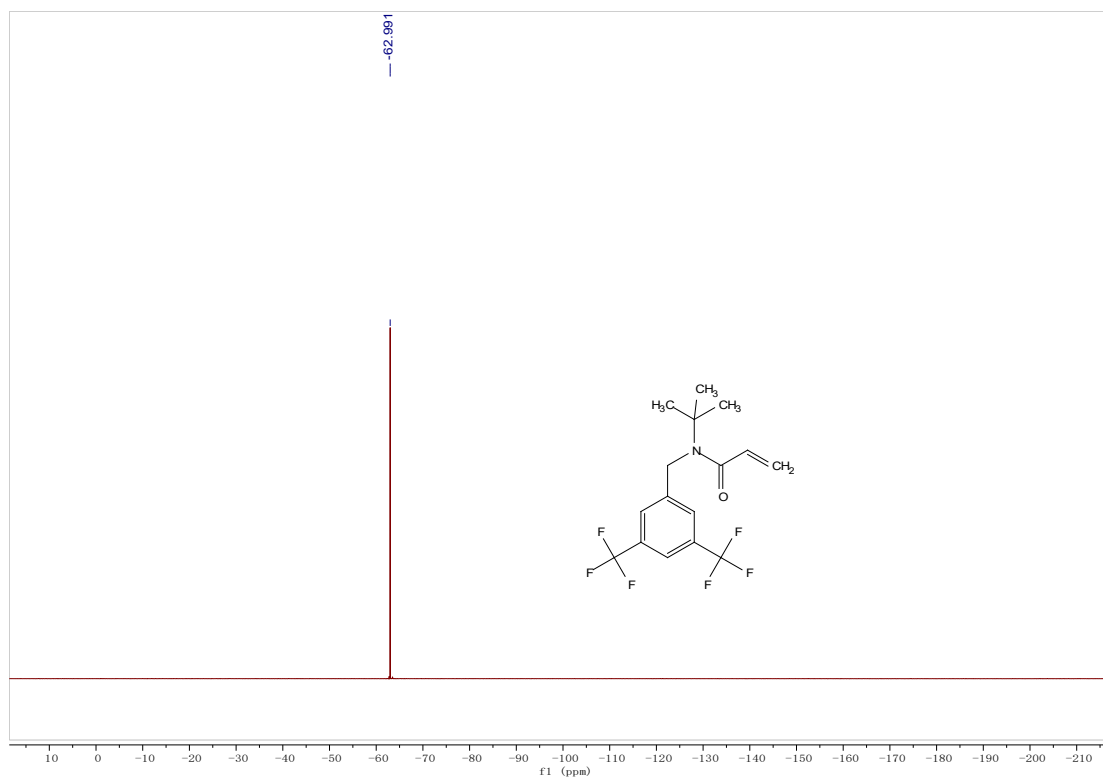

$^{19}\text{F}$  NMR of **1g**

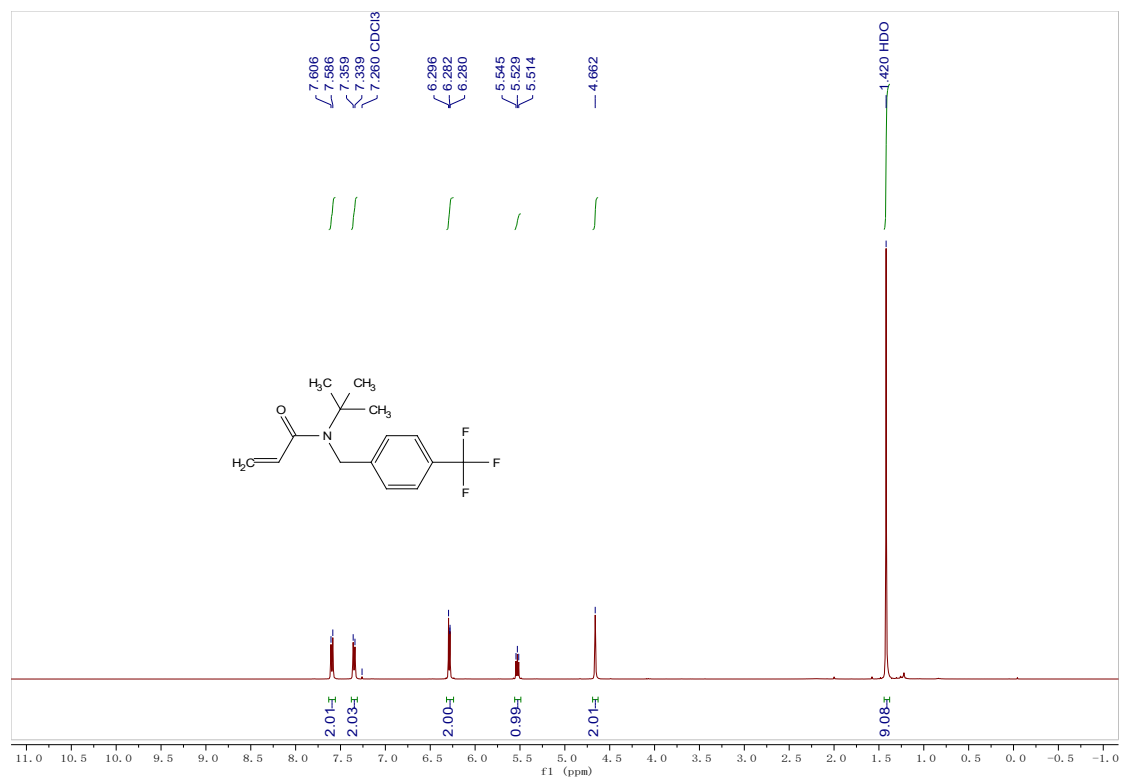

**<sup>1</sup>H NMR of **1h****

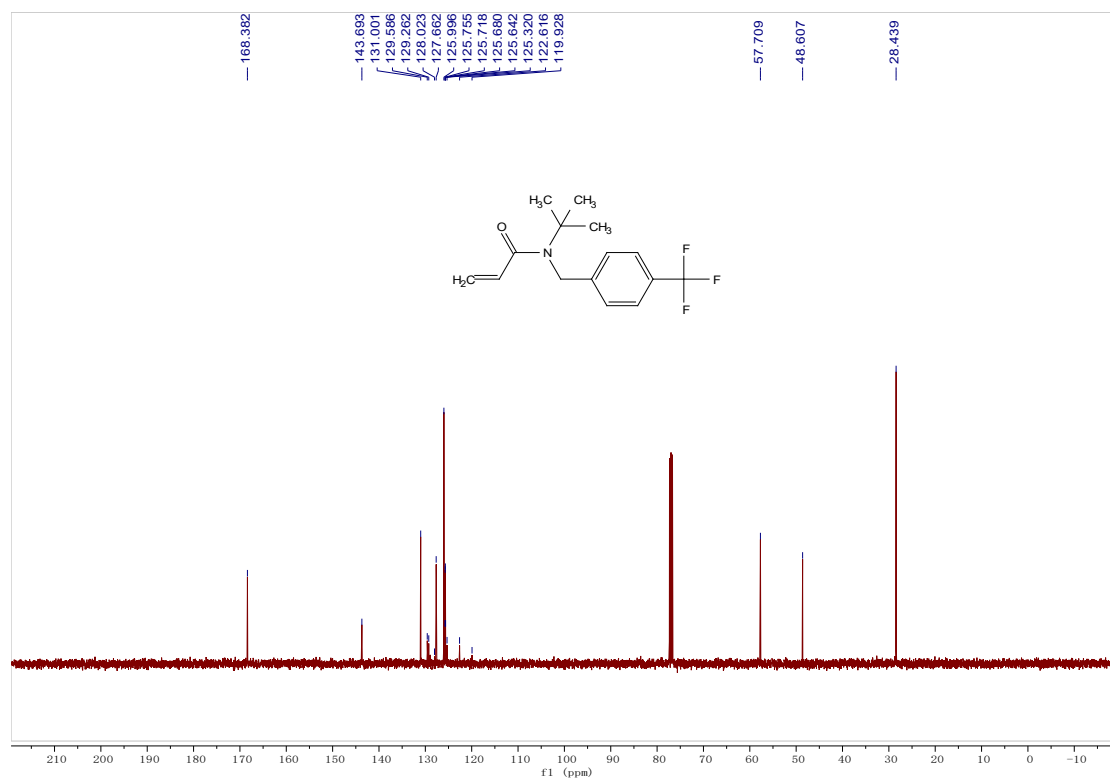

$^{13}\text{C}$  NMR of **1h**

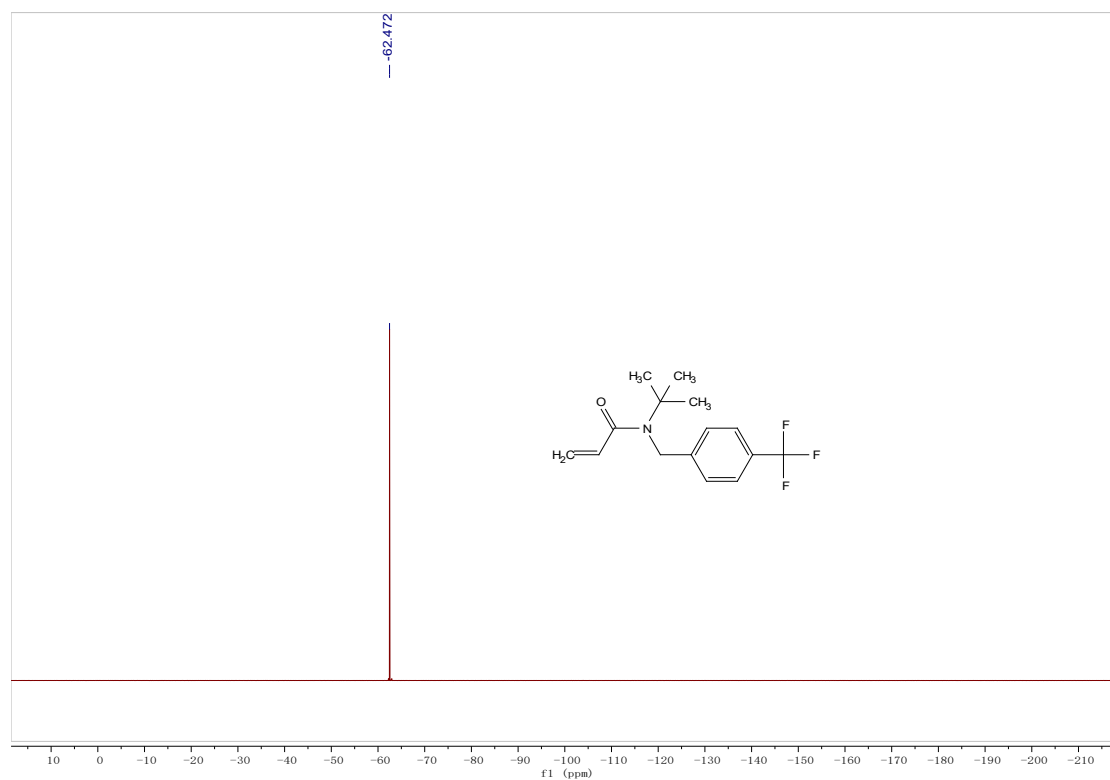

$^{19}\text{F}$  NMR of **1h**

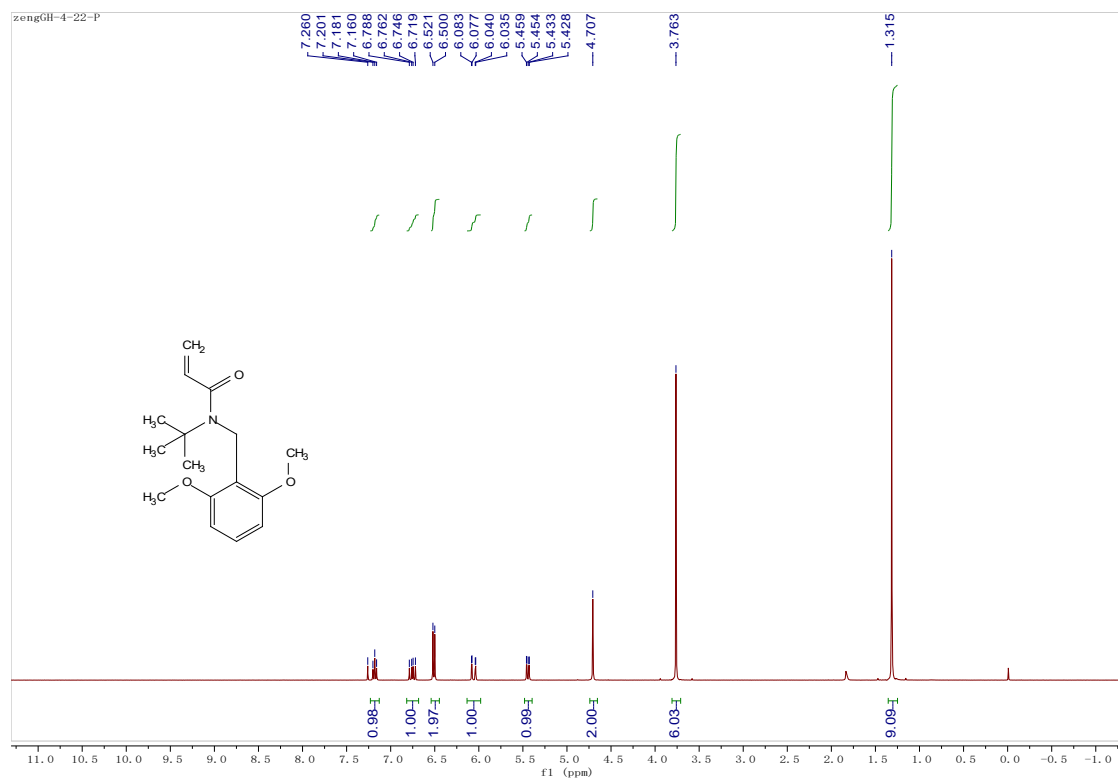

<sup>1</sup>H NMR of **1i**

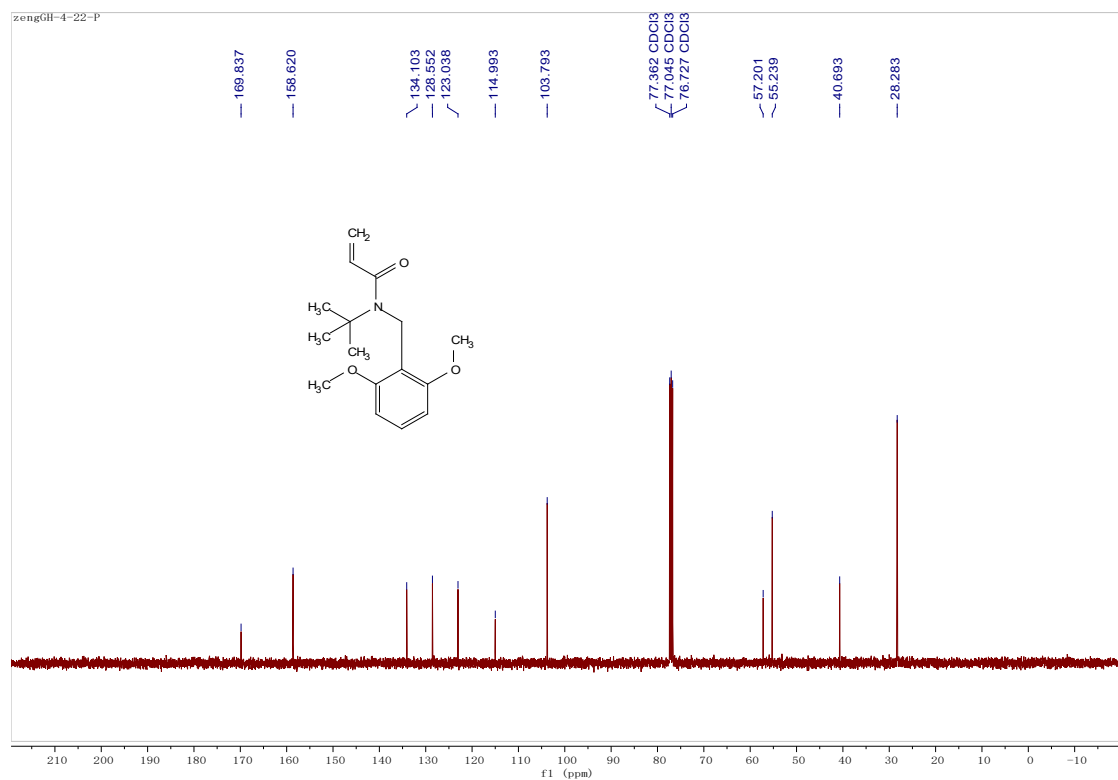

<sup>13</sup>C NMR of **1i**

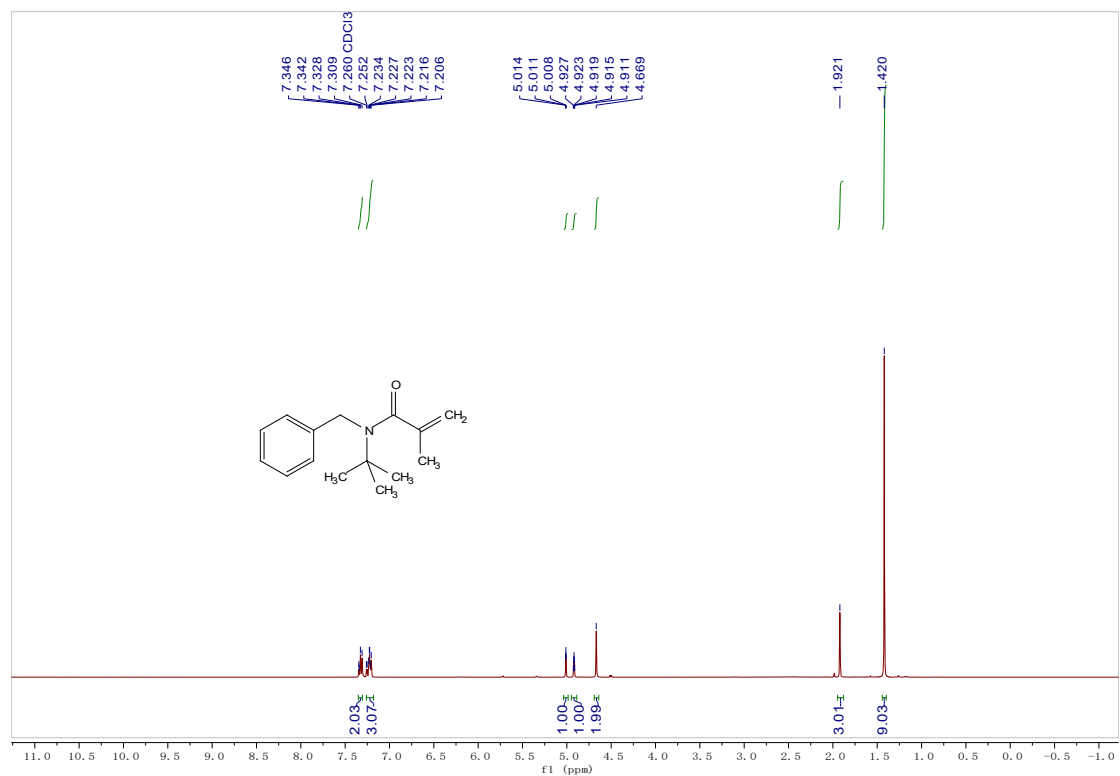

<sup>1</sup>H NMR of **1j**

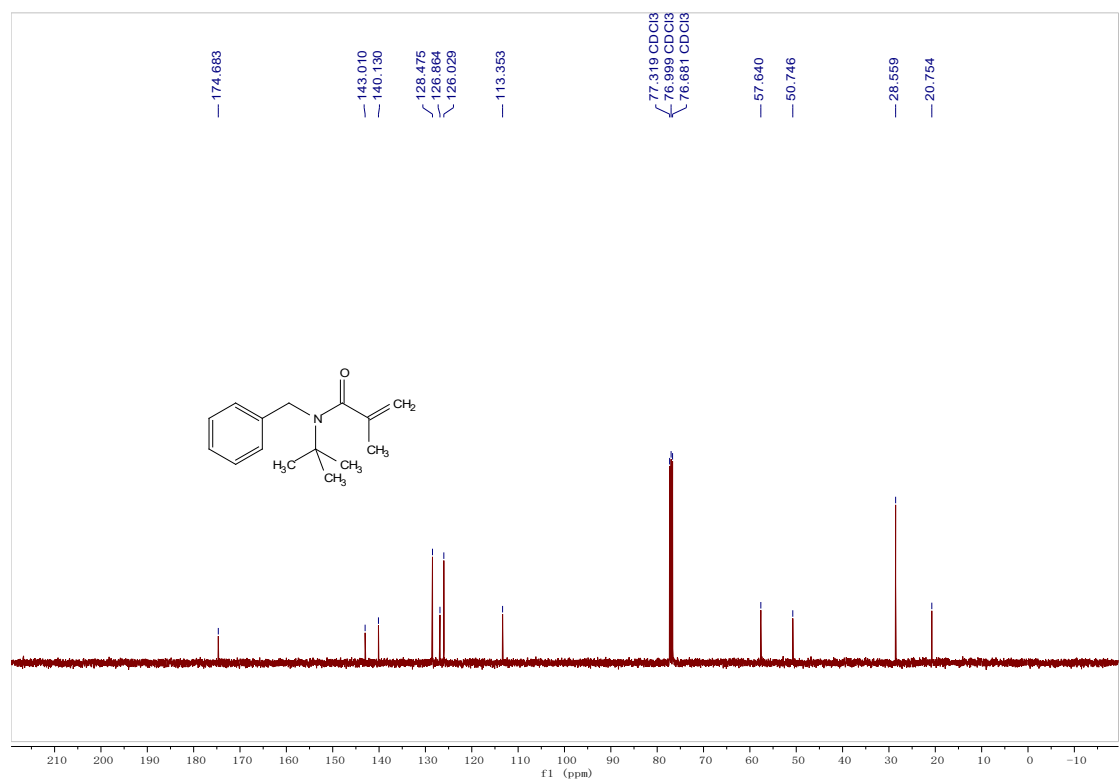

<sup>13</sup>C NMR of **1j**

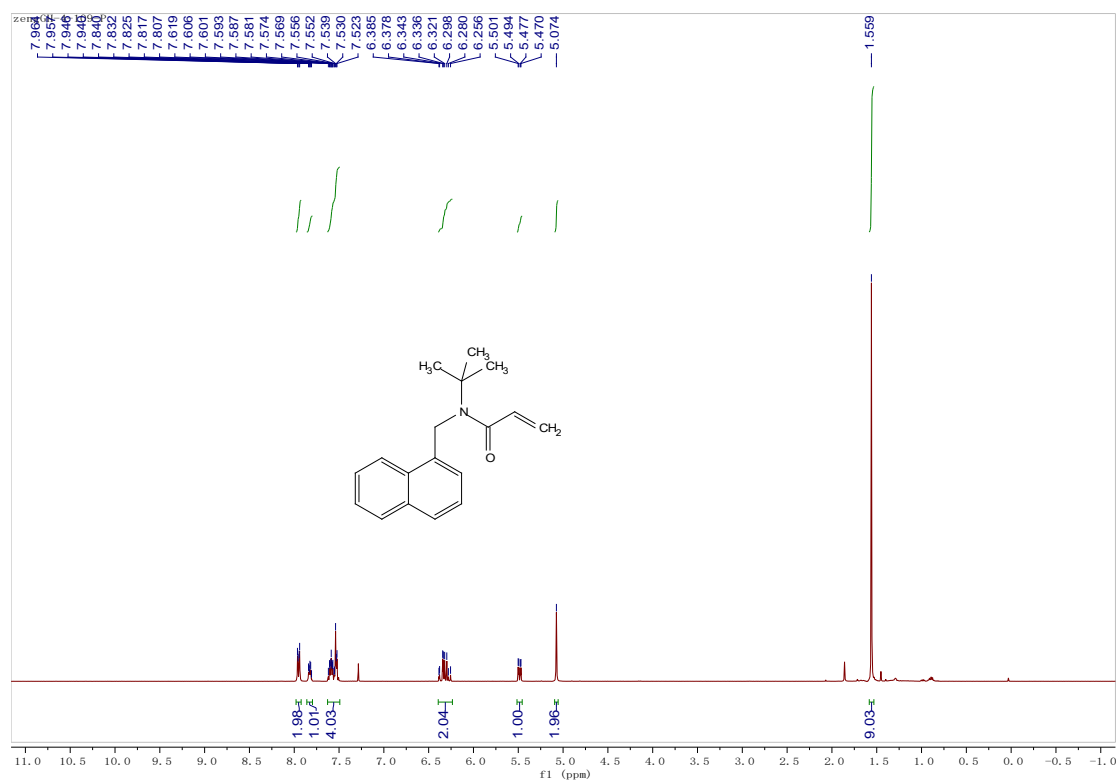

<sup>1</sup>H NMR of 1k

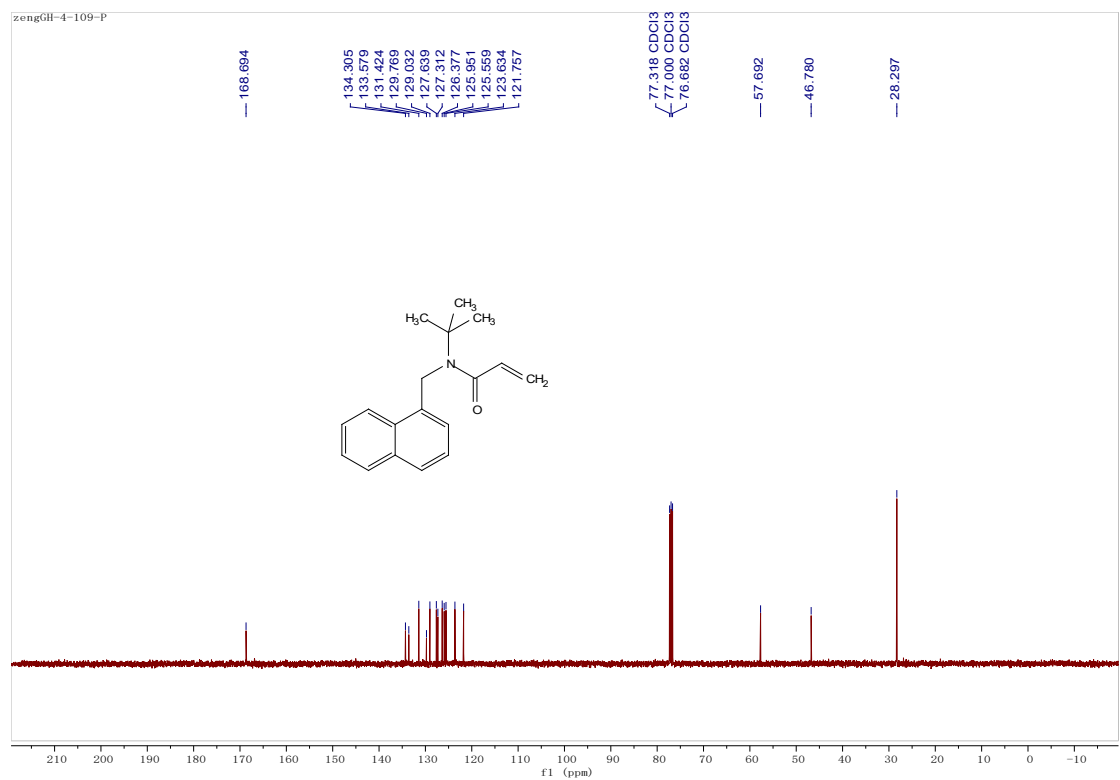

<sup>13</sup>C NMR of **1k**

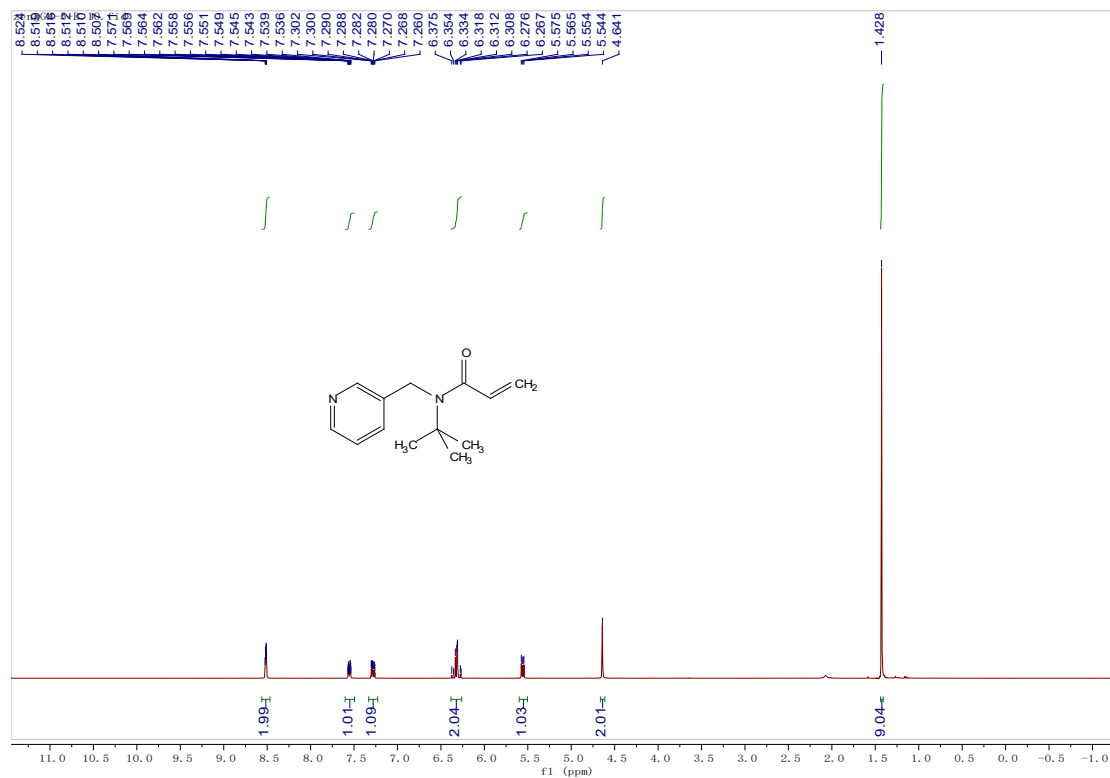

<sup>1</sup>H NMR of **1l**



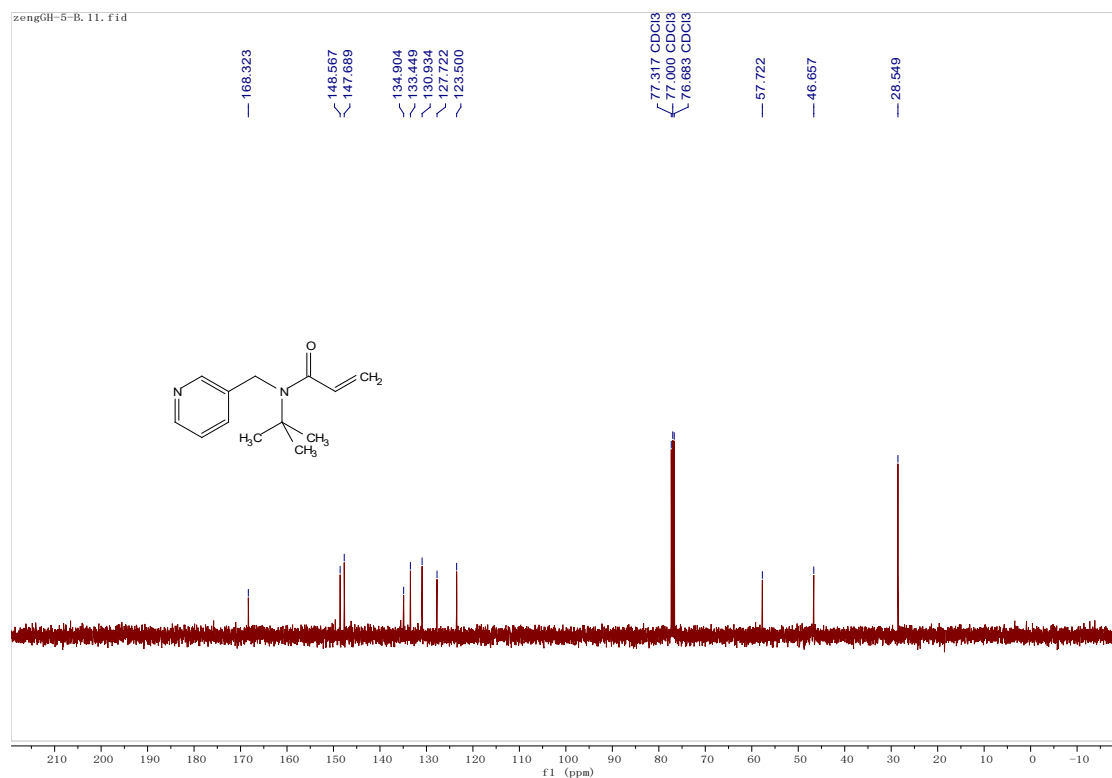

$^{13}\text{C}$  NMR of **11**

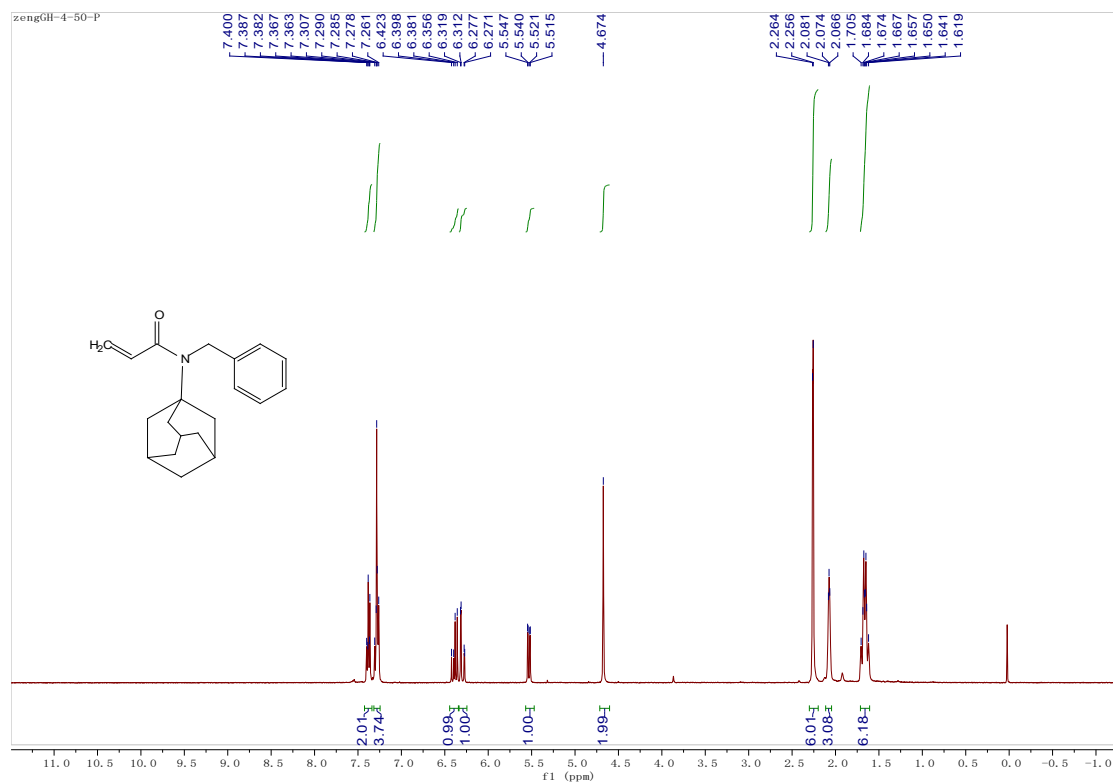

<sup>1</sup>H NMR of 1m

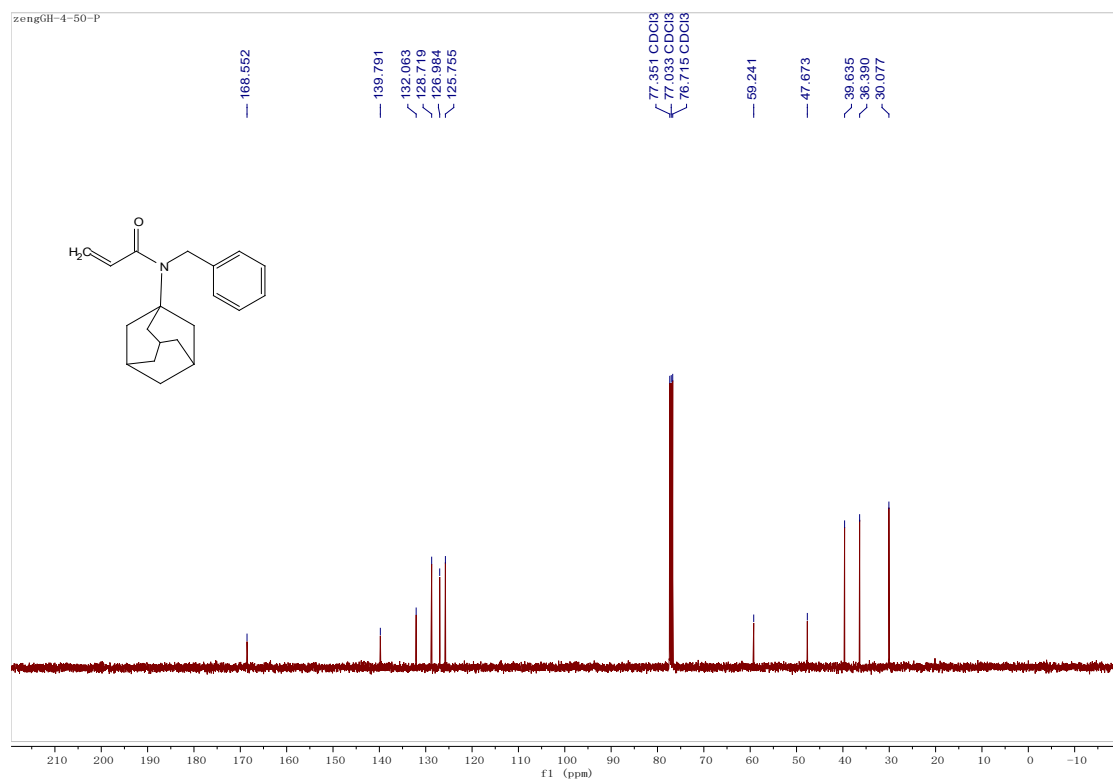

<sup>13</sup>C NMR of **1m**

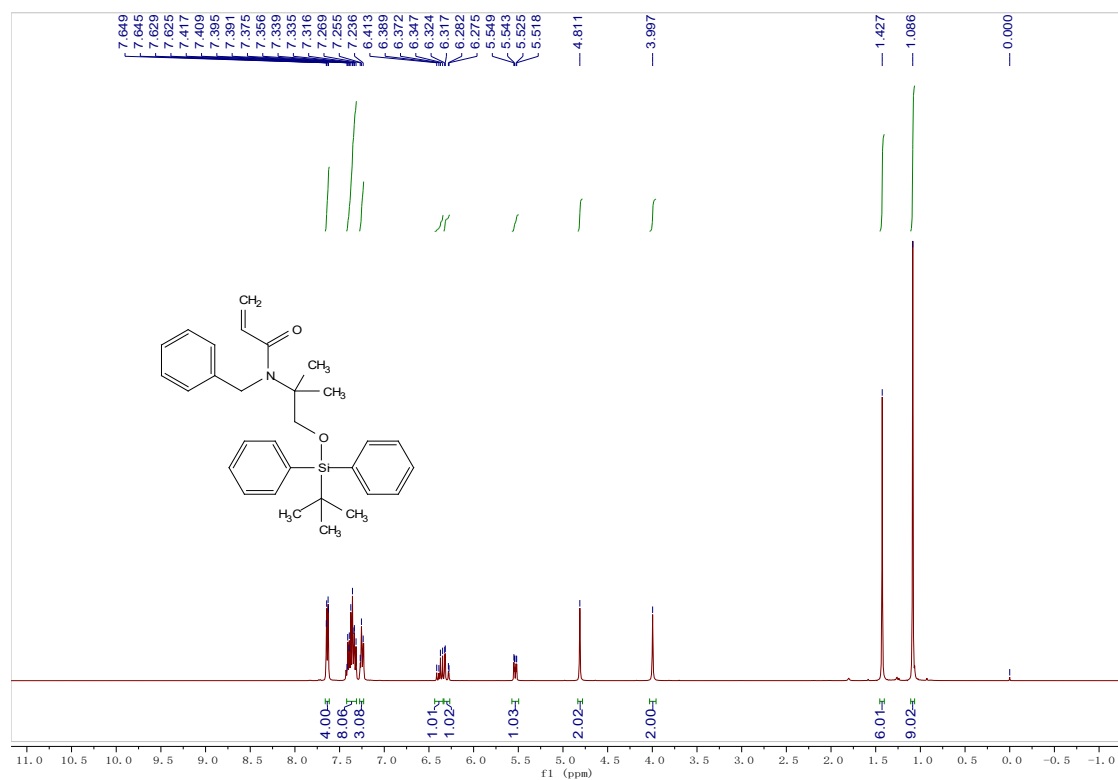

<sup>1</sup>H NMR of **1n**

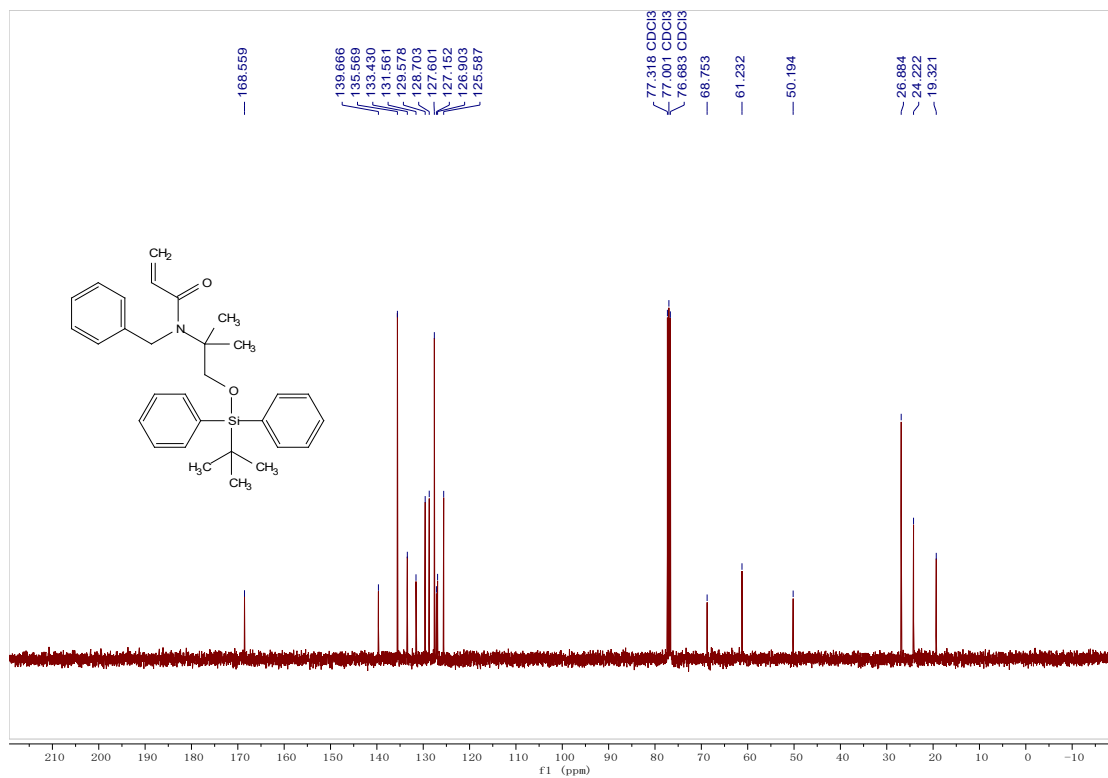

**<sup>13</sup>C NMR of 1n**

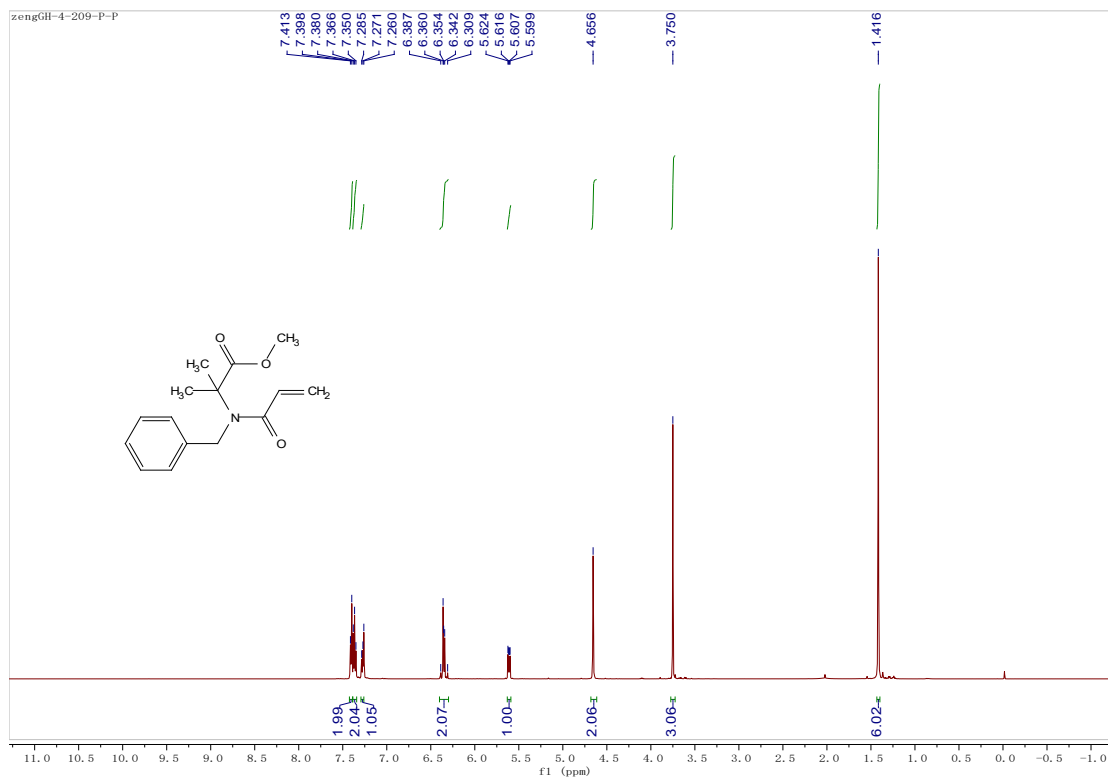

**<sup>1</sup>H NMR of 1o**

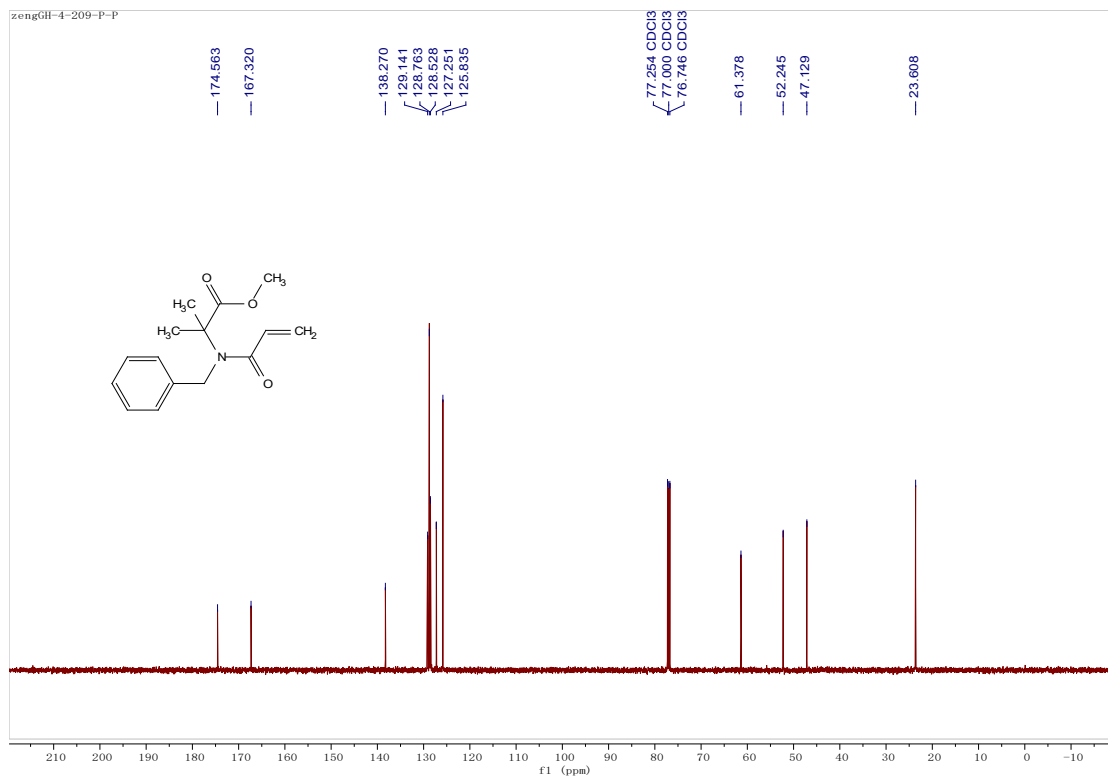

<sup>13</sup>C NMR of **10**

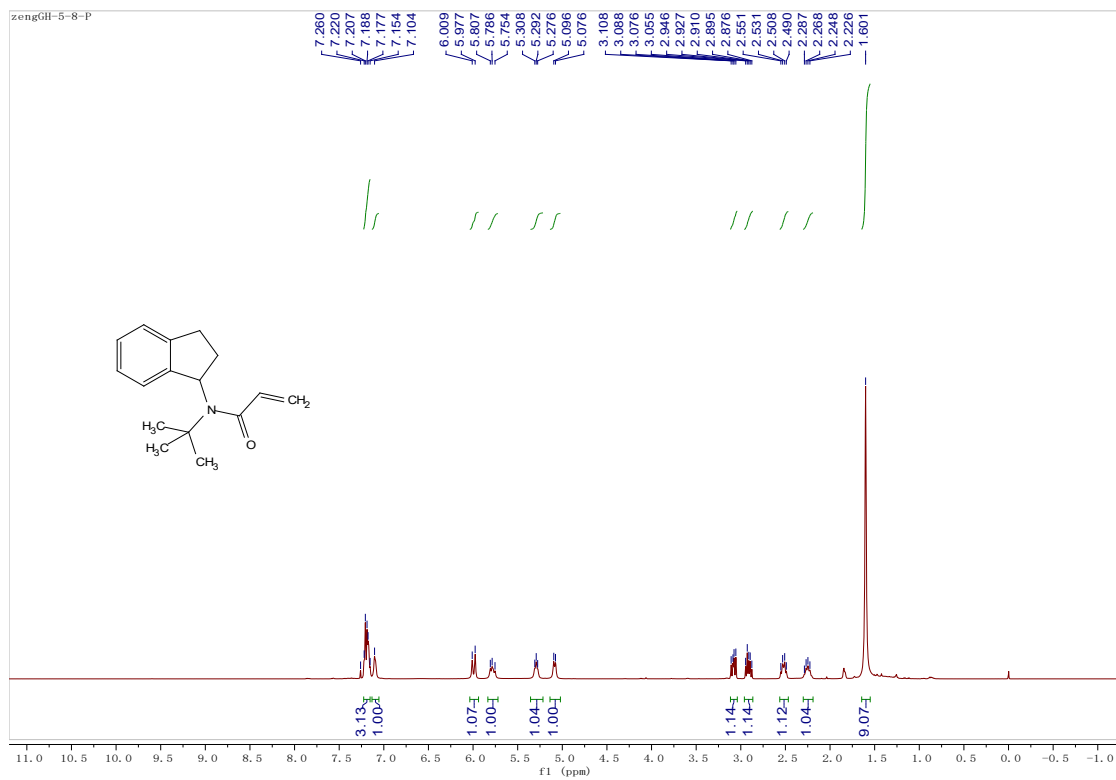

<sup>1</sup>H NMR of **1p**

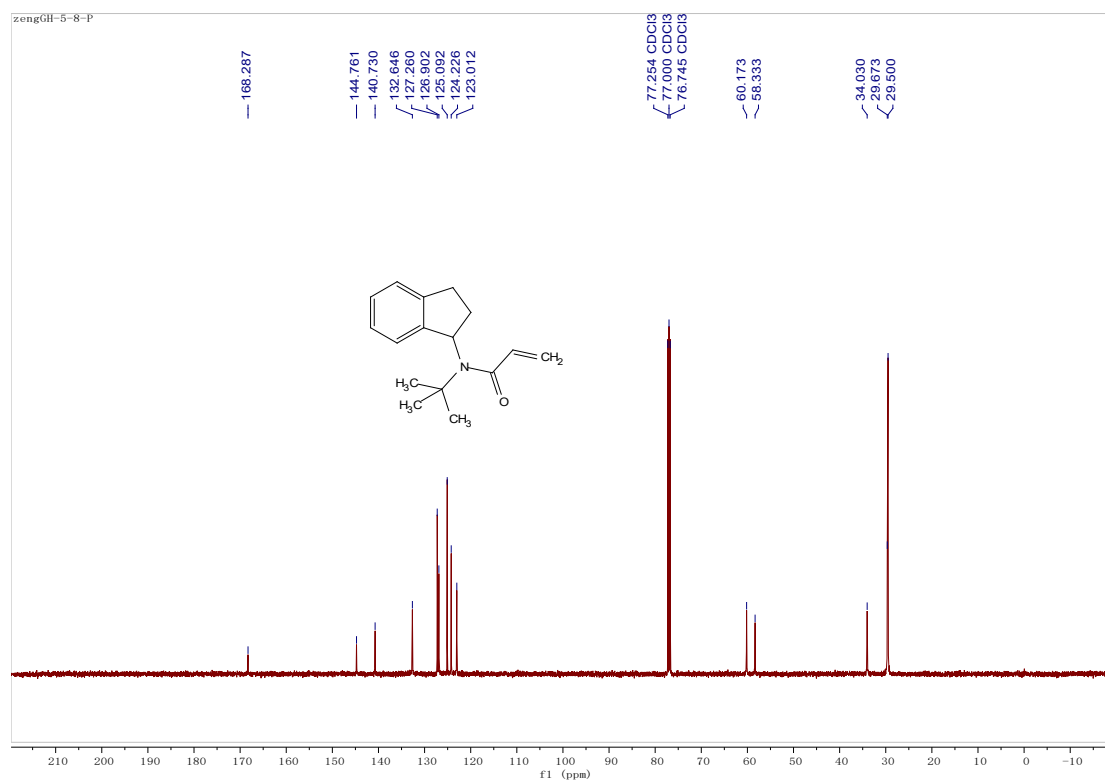

<sup>13</sup>C NMR of **1p**

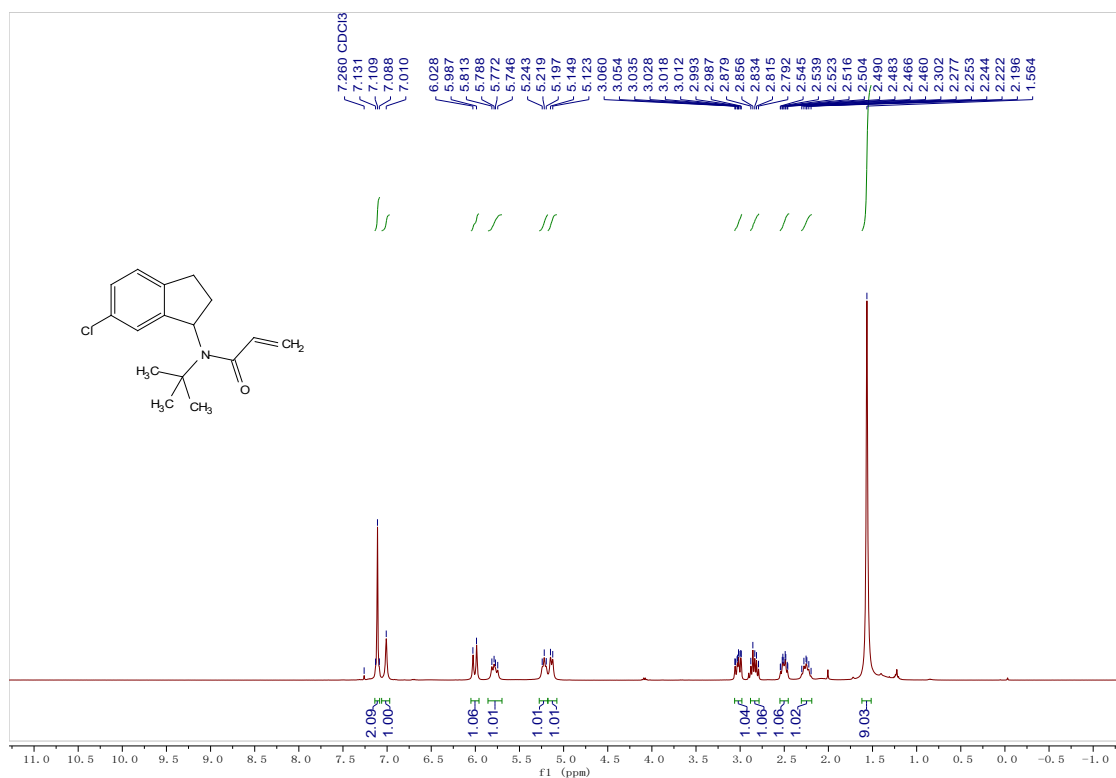

<sup>1</sup>H NMR of 1q

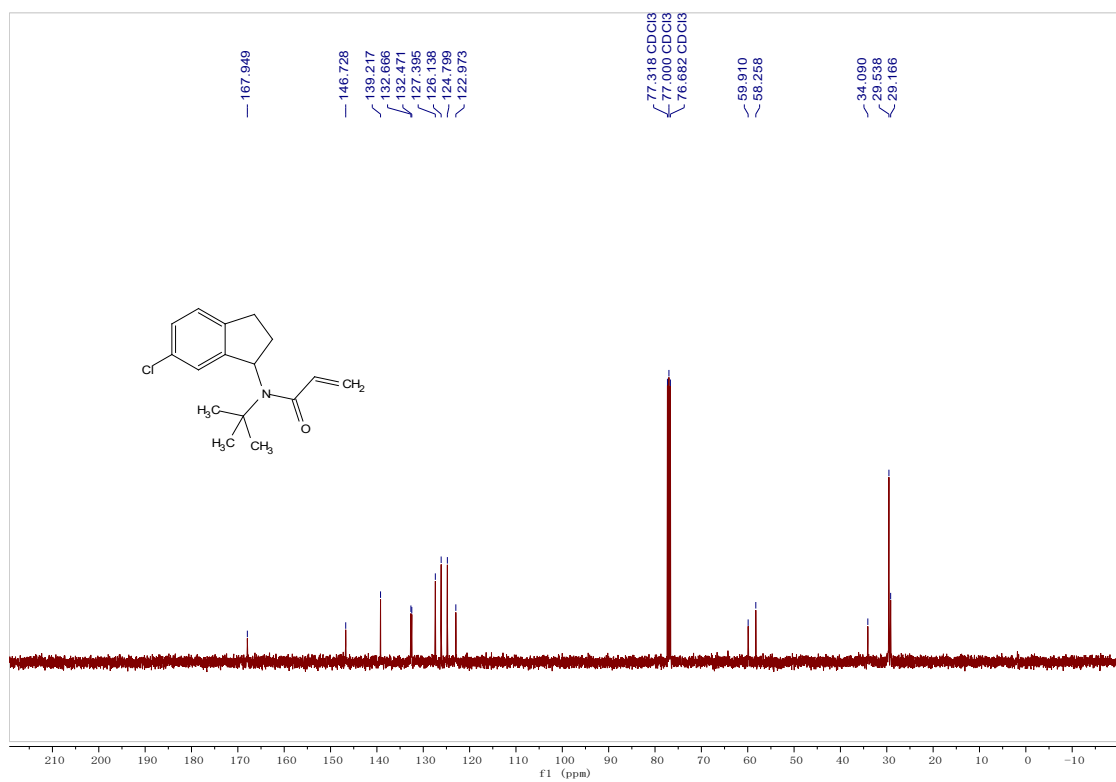

<sup>13</sup>C NMR of 1q

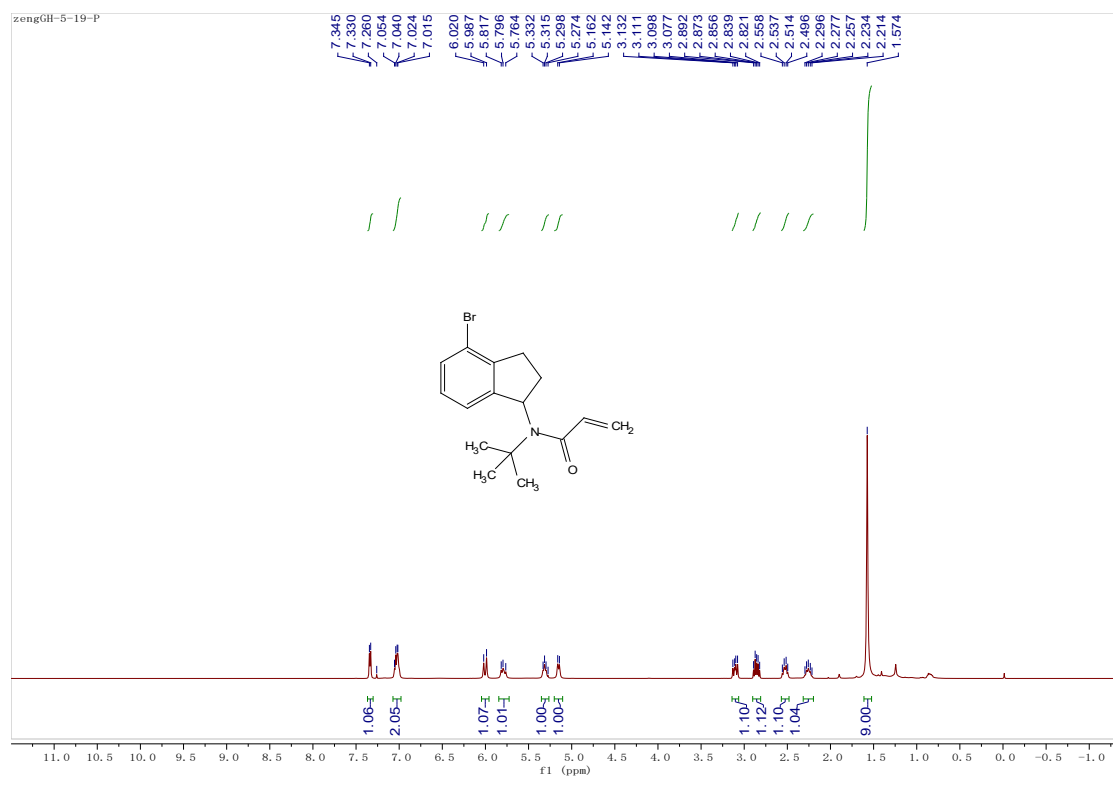

<sup>1</sup>H NMR of **1r**

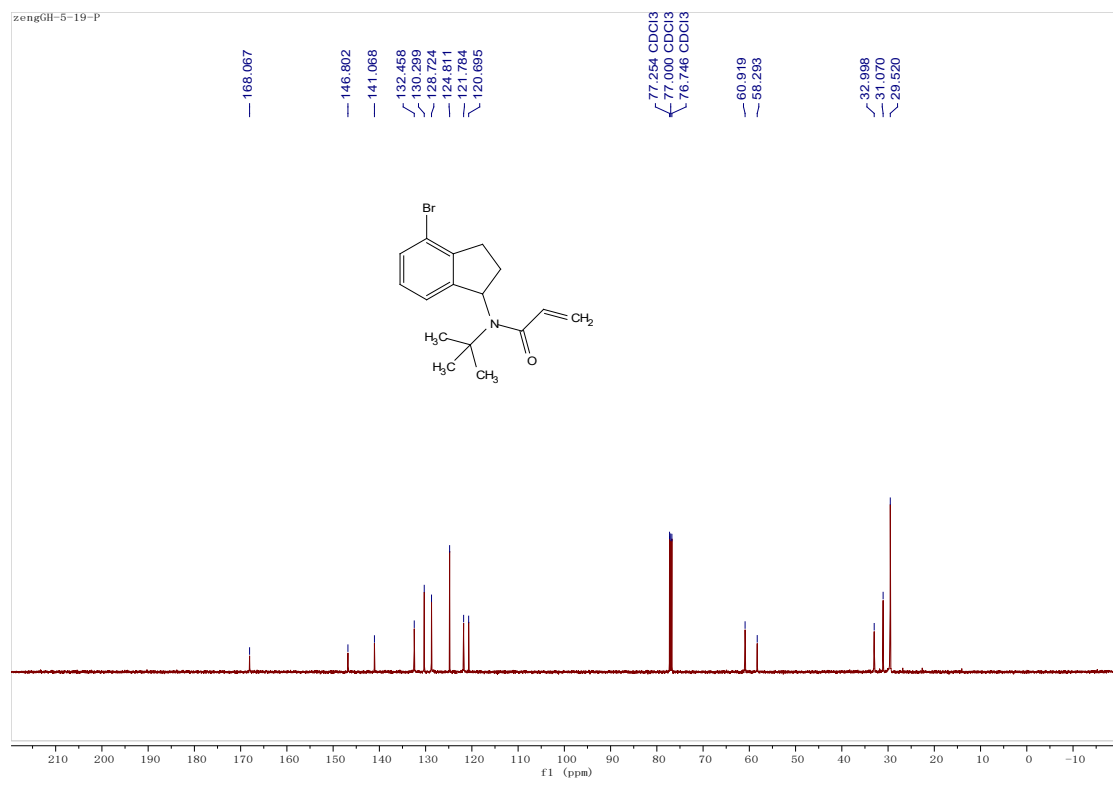



# <sup>13</sup>C NMR of 1r

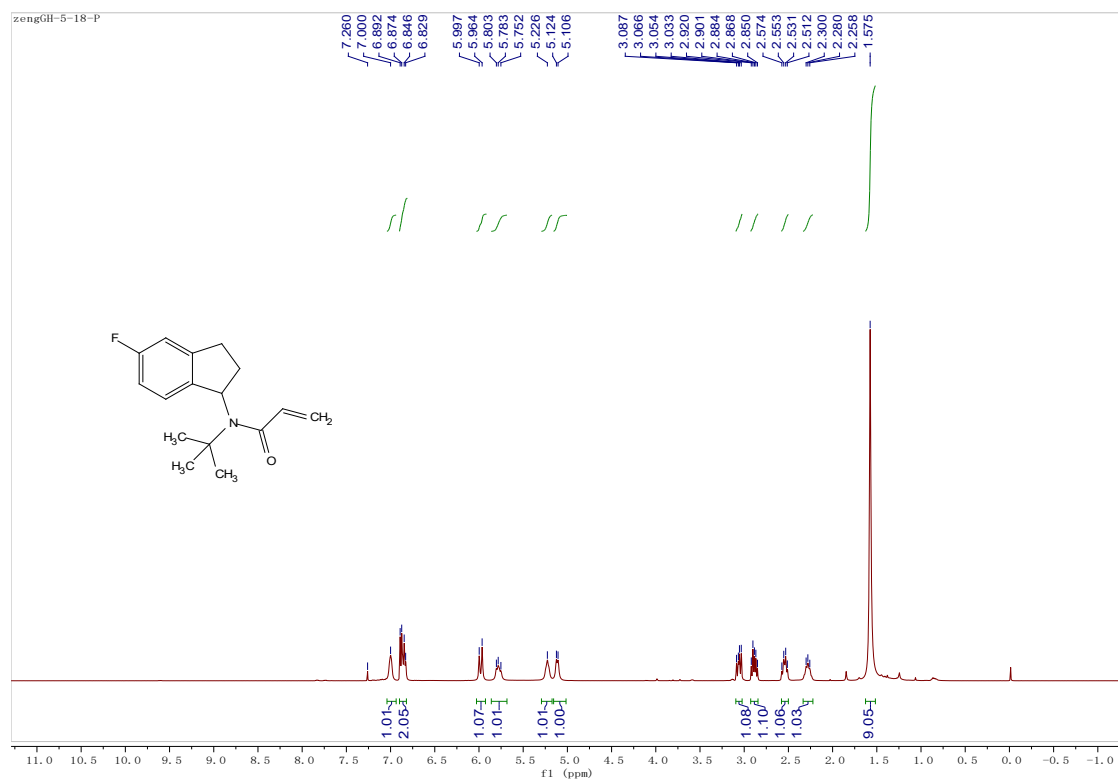

# <sup>1</sup>H NMR of 1s

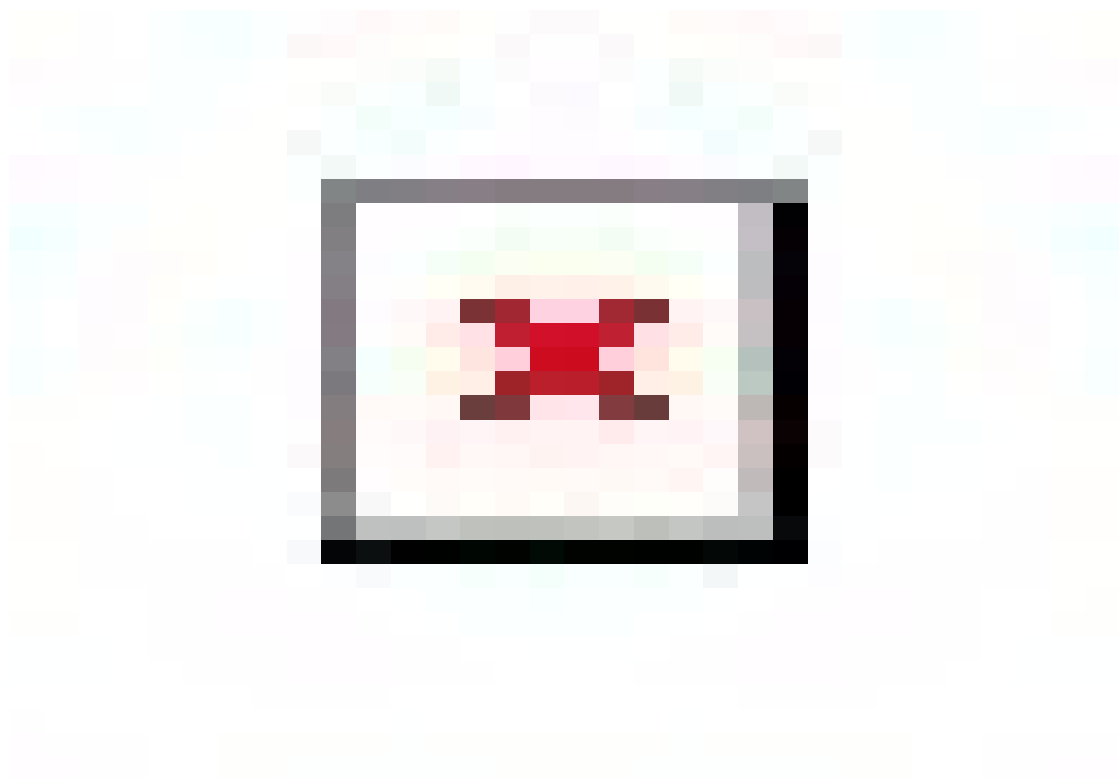

$^{13}\text{C}$  NMR of **1s**

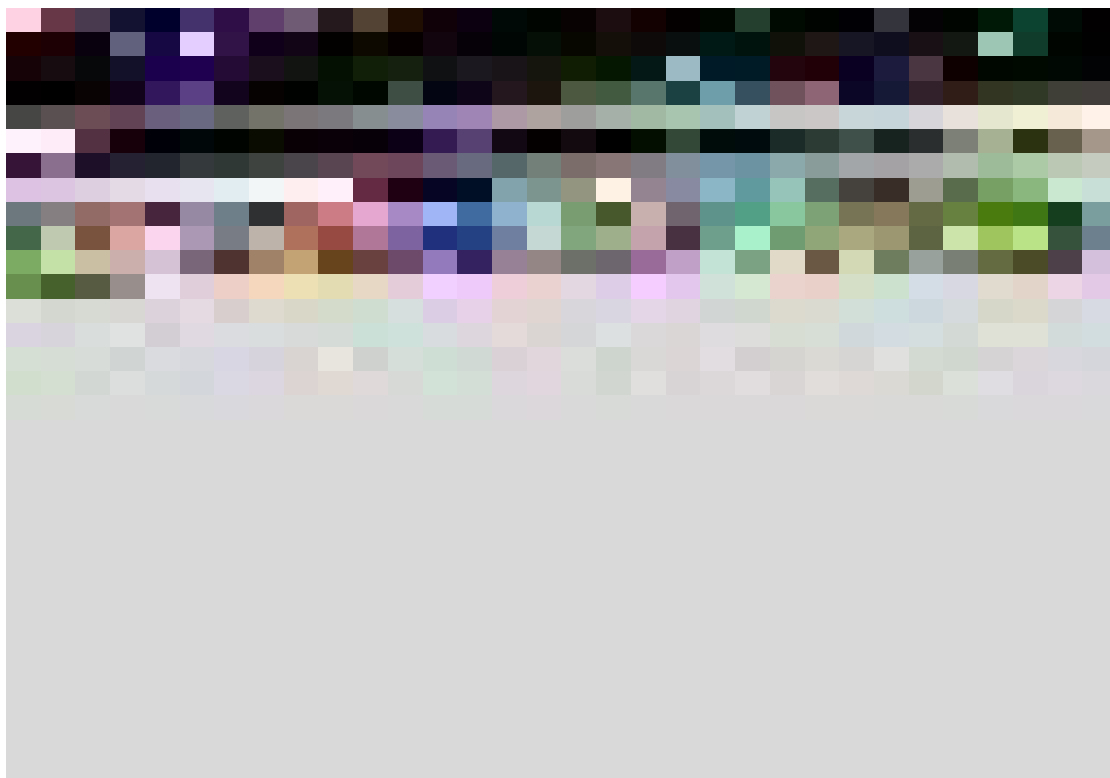

$^{19}\text{F}$  NMR of **1s**

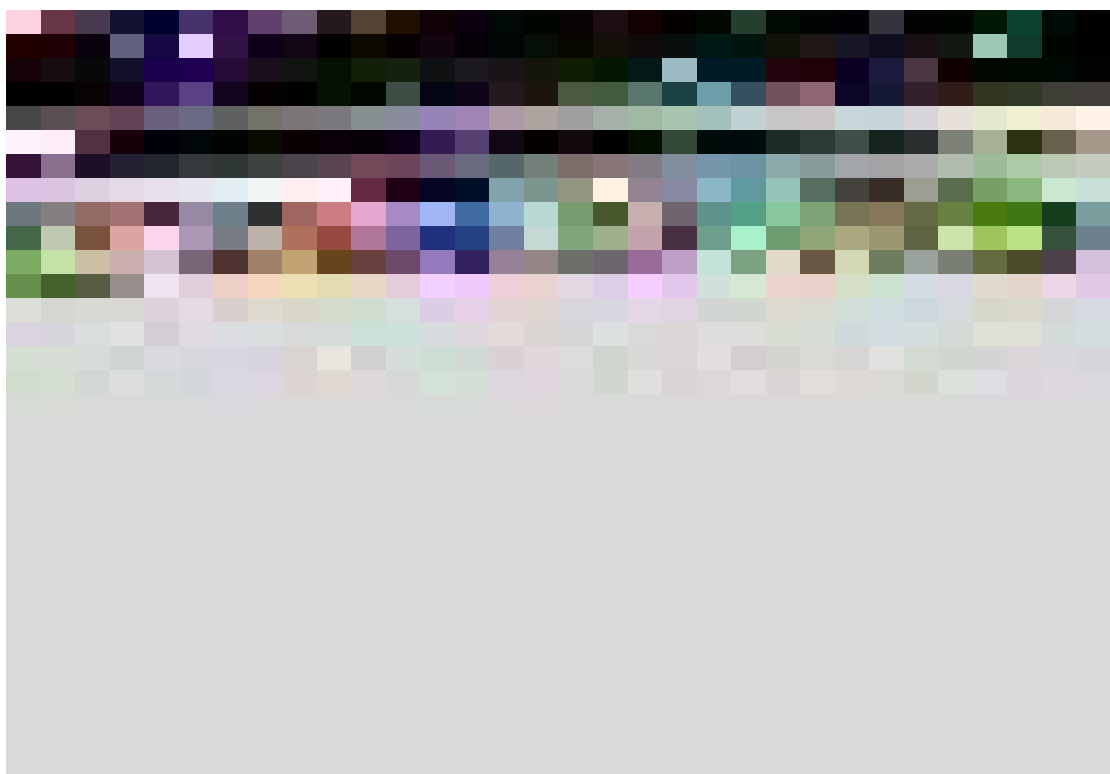

$^1\text{H}$  NMR of **1t**

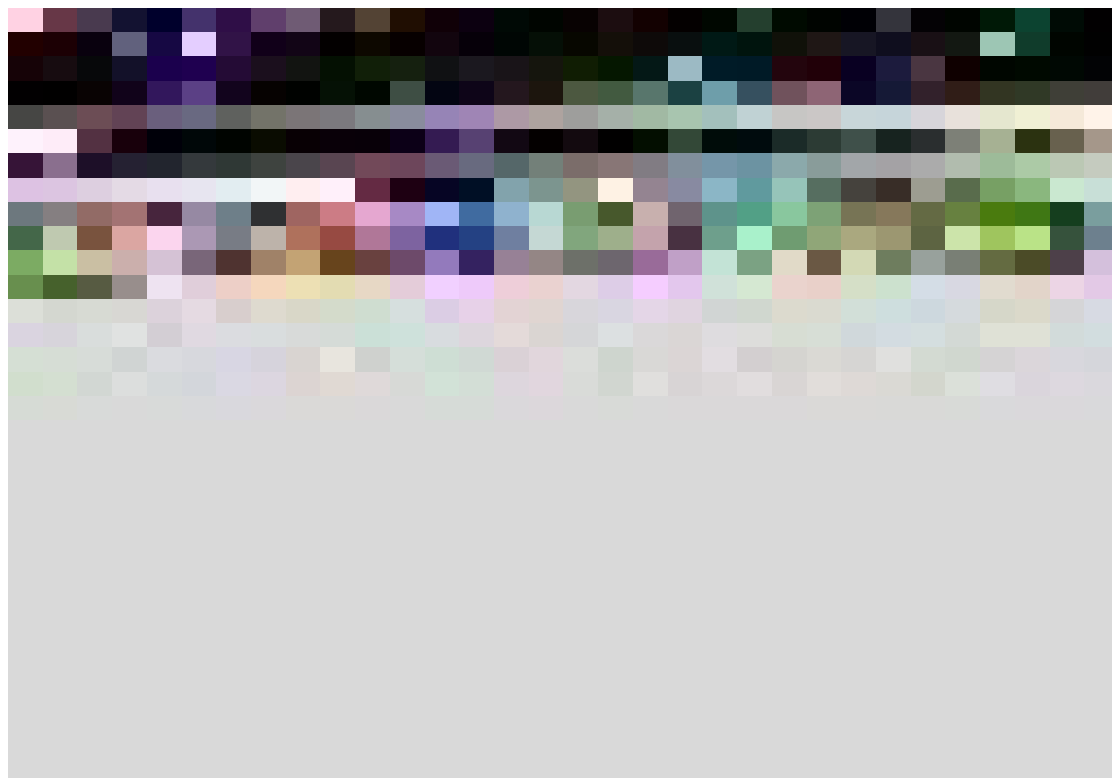

$^{13}\text{C}$  NMR of **1t**

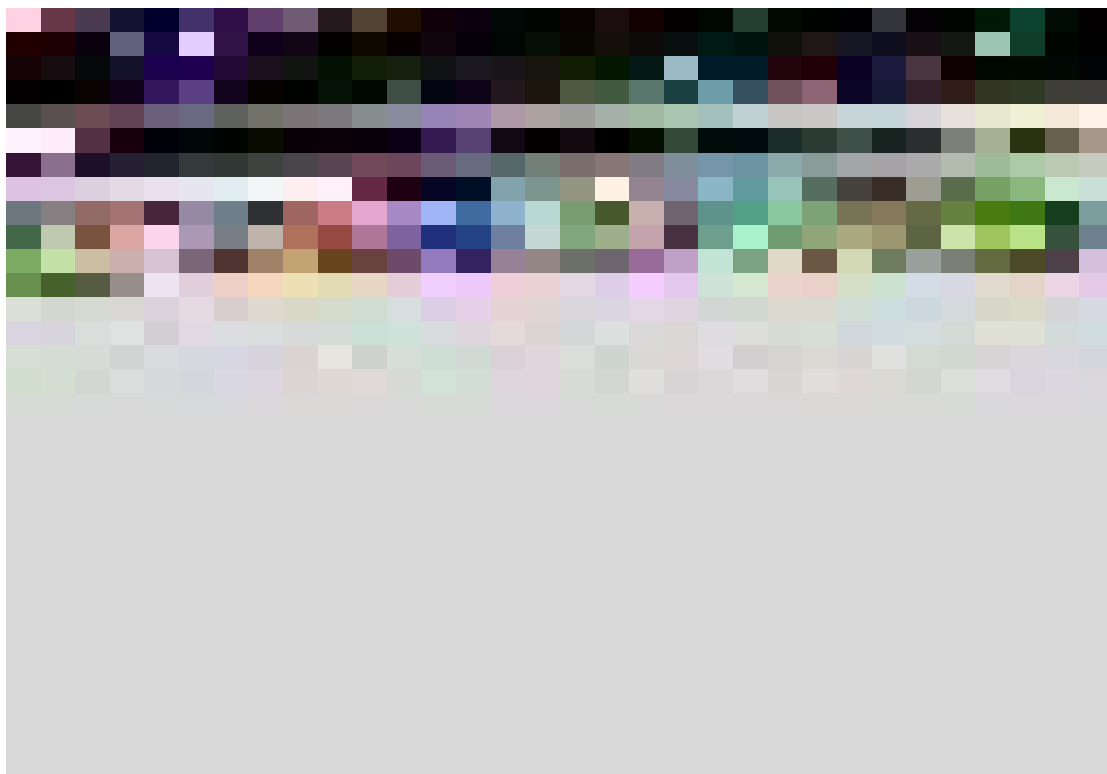

<sup>1</sup>H NMR of **1u**

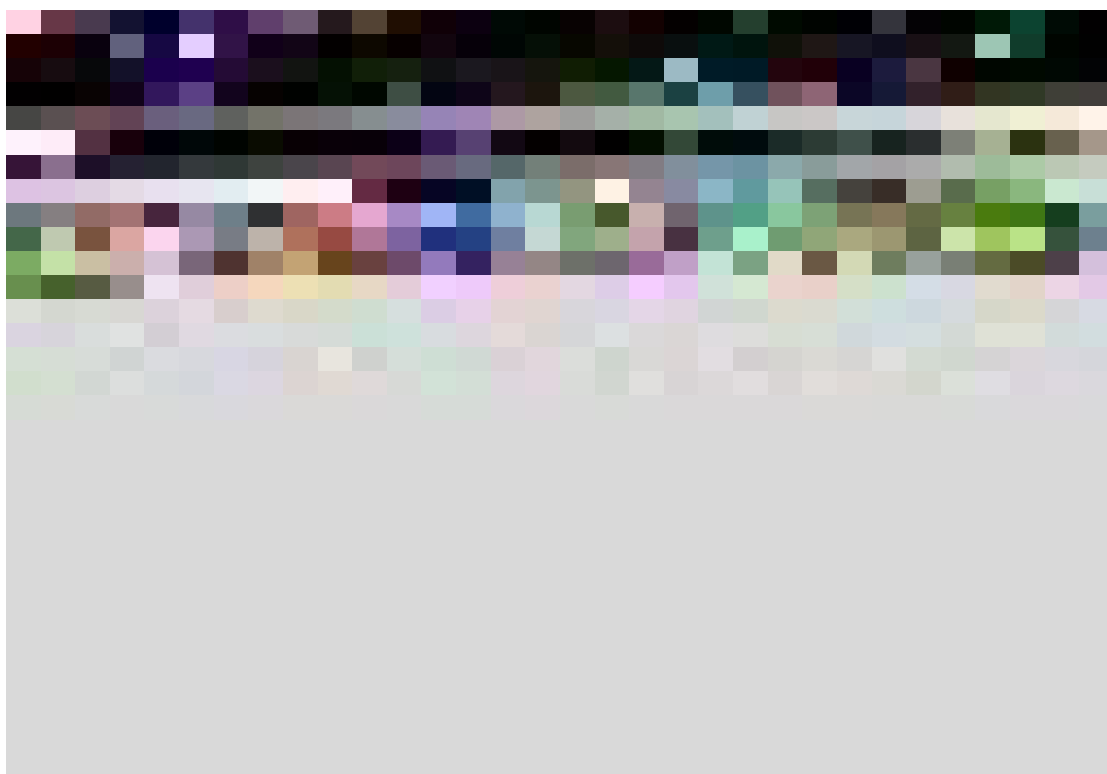

<sup>13</sup>C NMR of **1u**

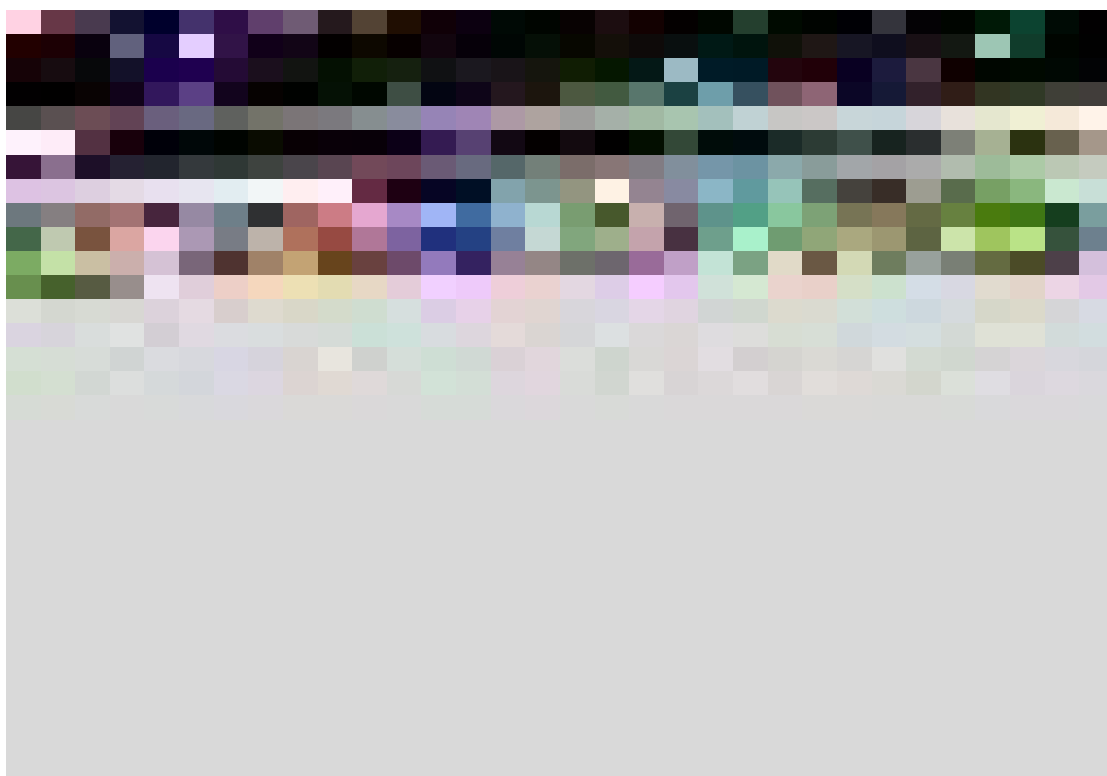

$^1\text{H}$  NMR of **1v**

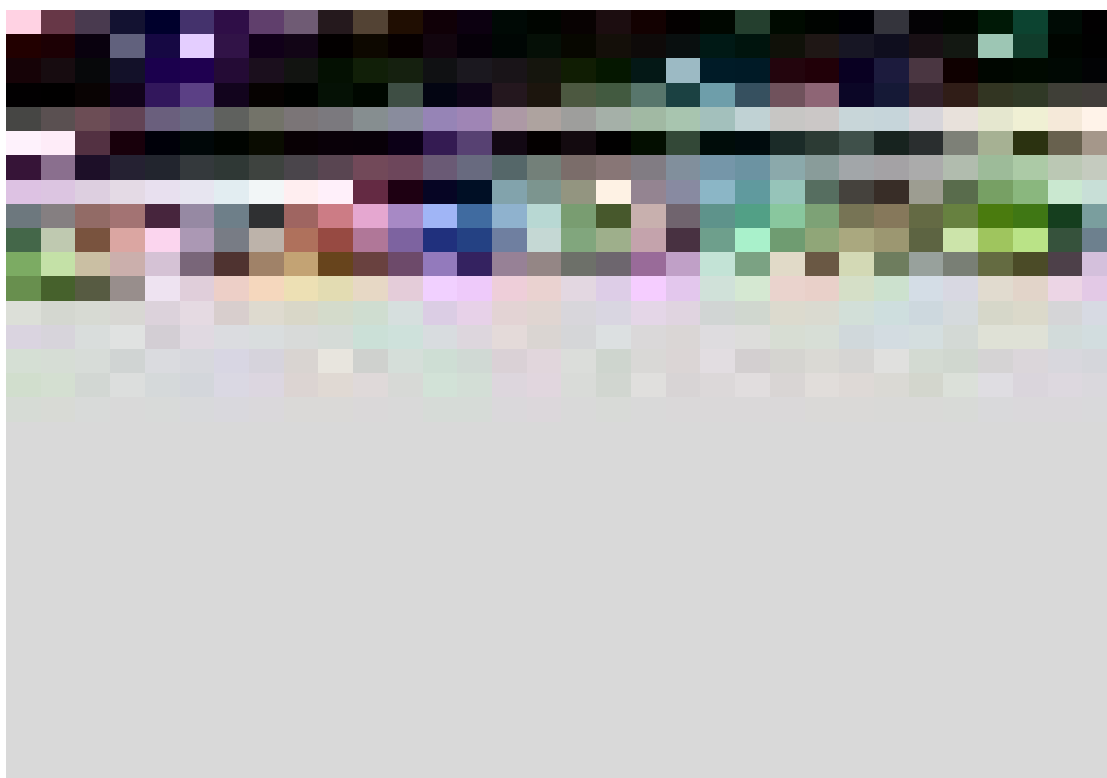

$^{13}\text{C}$  NMR of **1v**

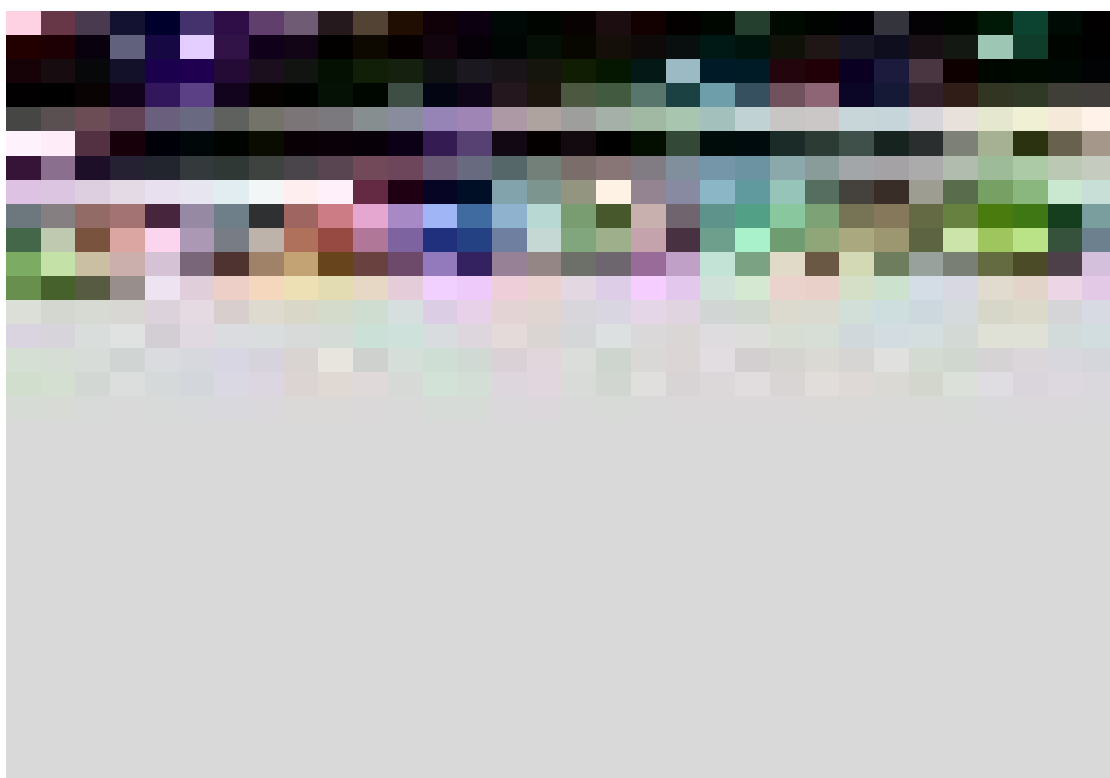

$^1\text{H}$  NMR of **1w**



$^{13}\text{C}$  NMR of **1w**



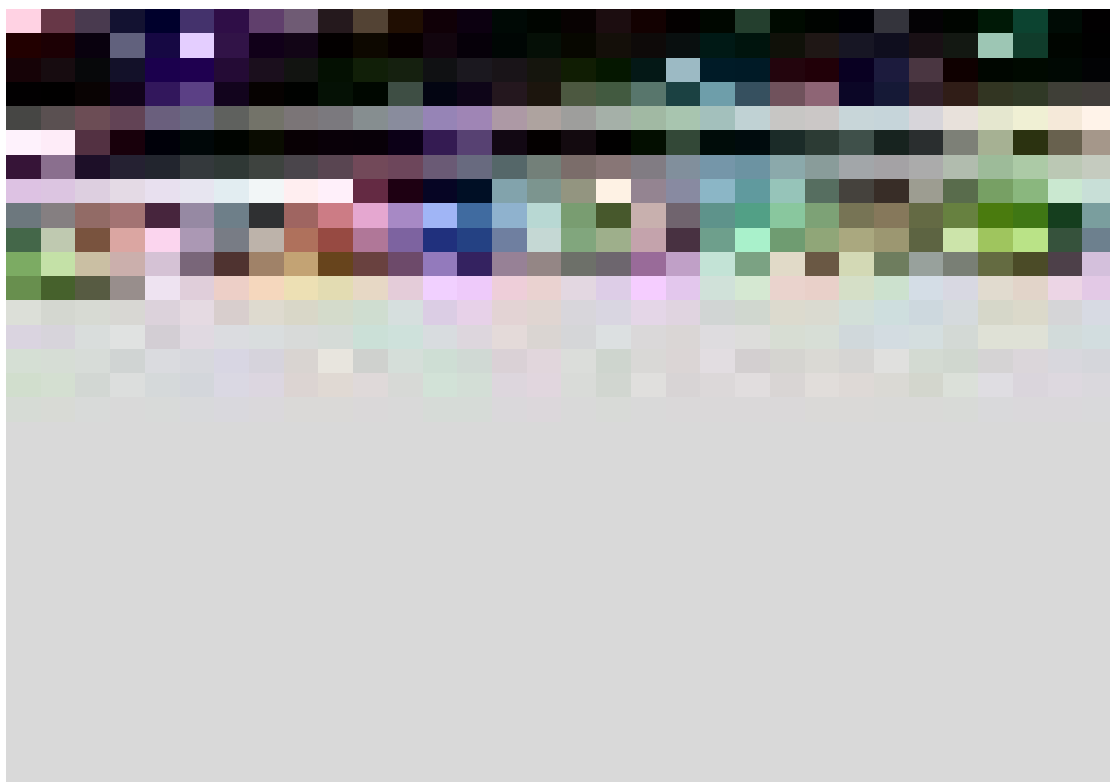

<sup>1</sup>H NMR of **1x**

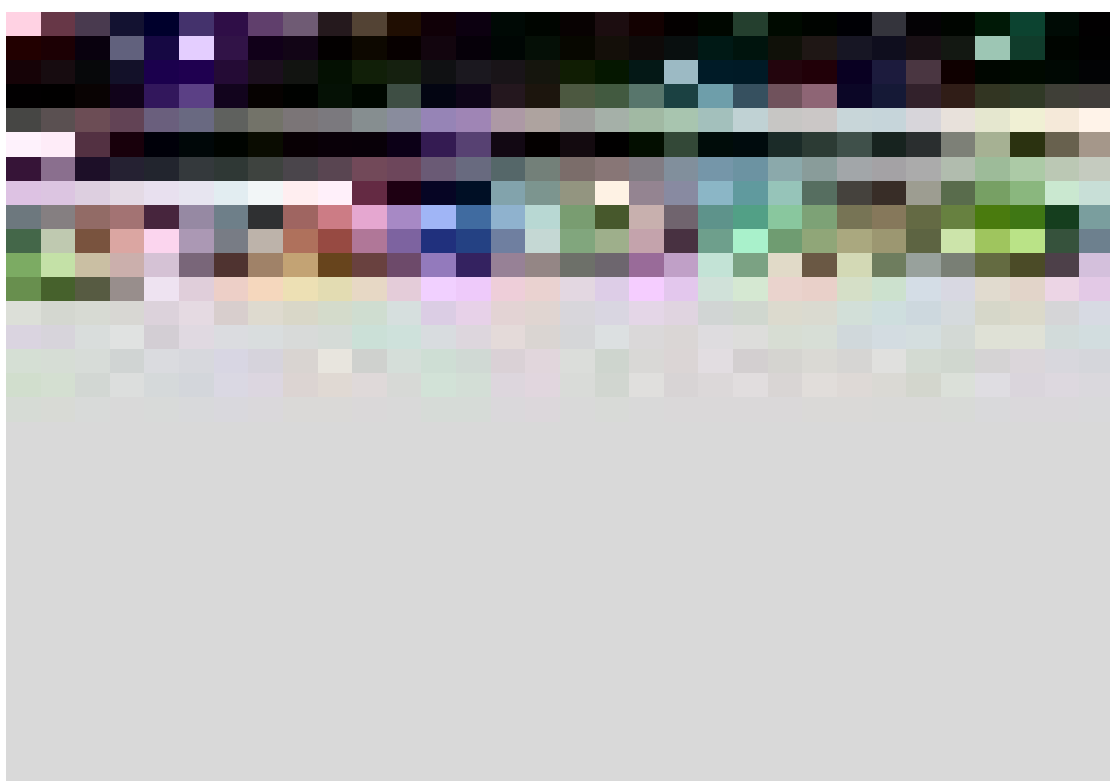

<sup>13</sup>C NMR of **1x**

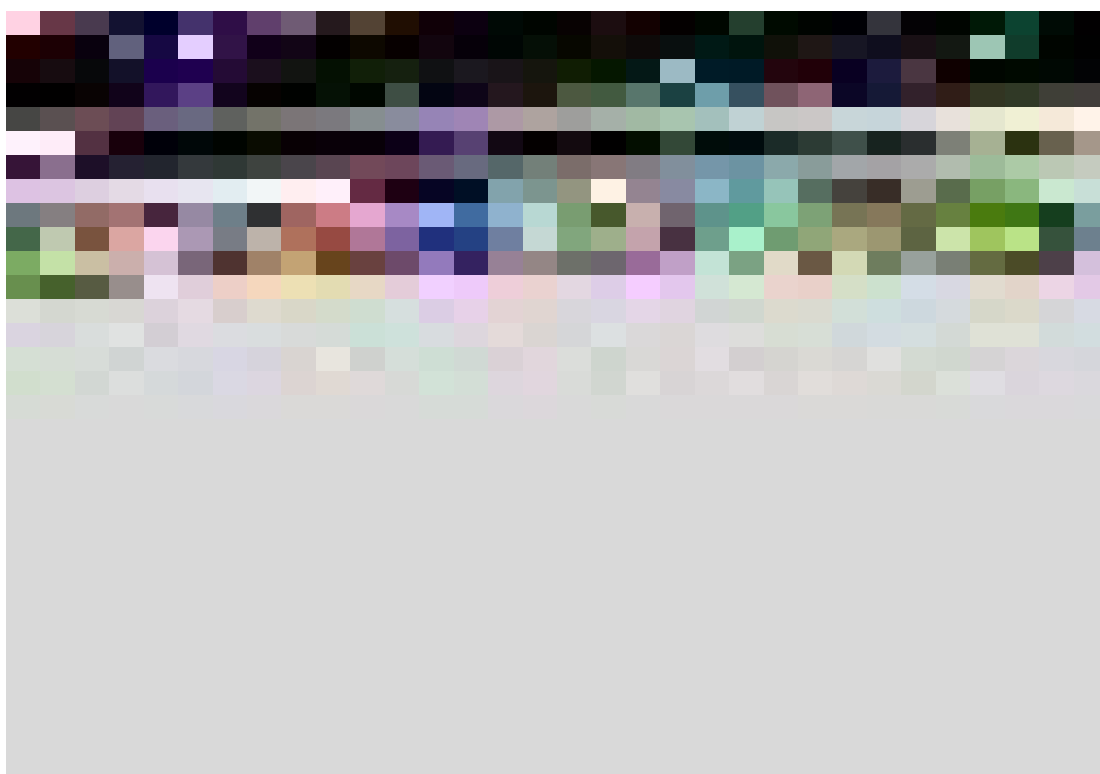

$^1\text{H}$  NMR of **3-1**

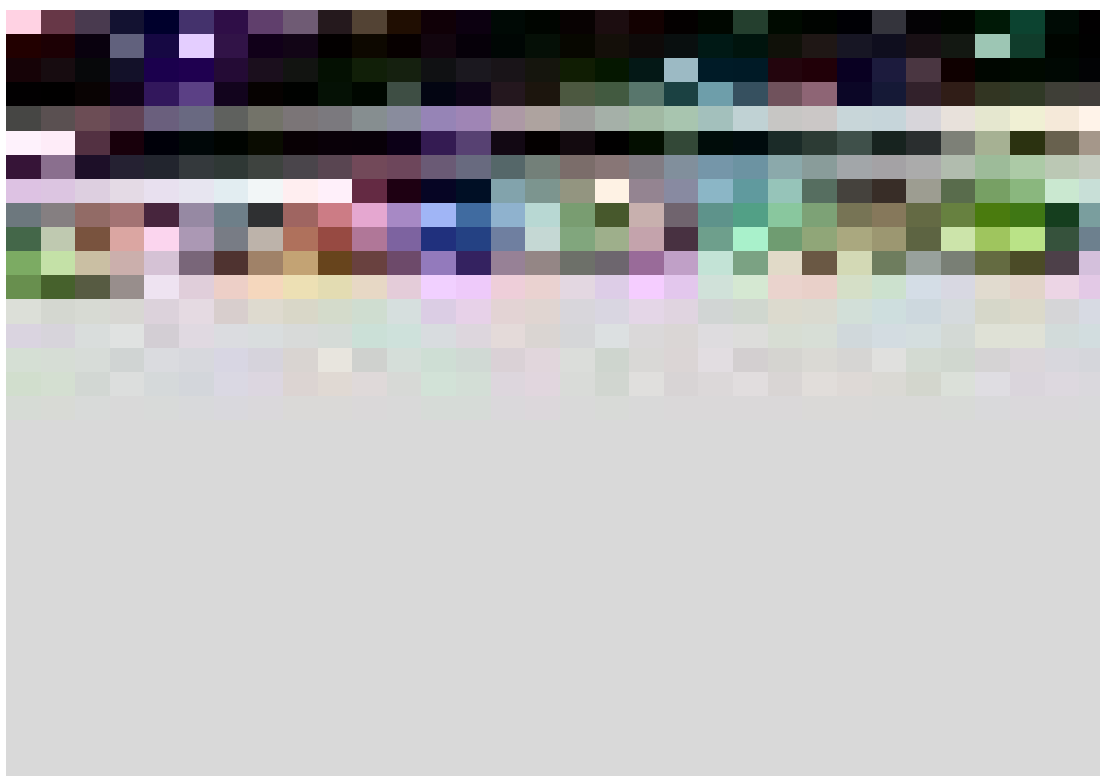

$^{13}\text{C}$  NMR of **3-1**

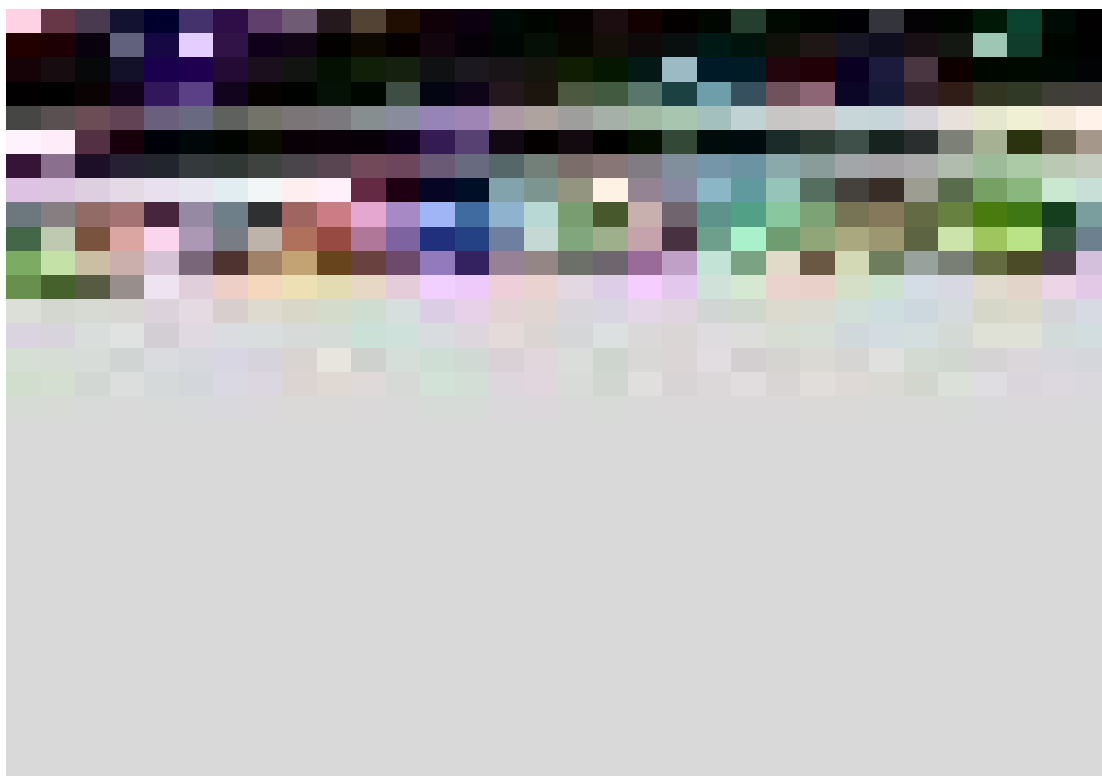

$^1\text{H}$  NMR of **3-2**

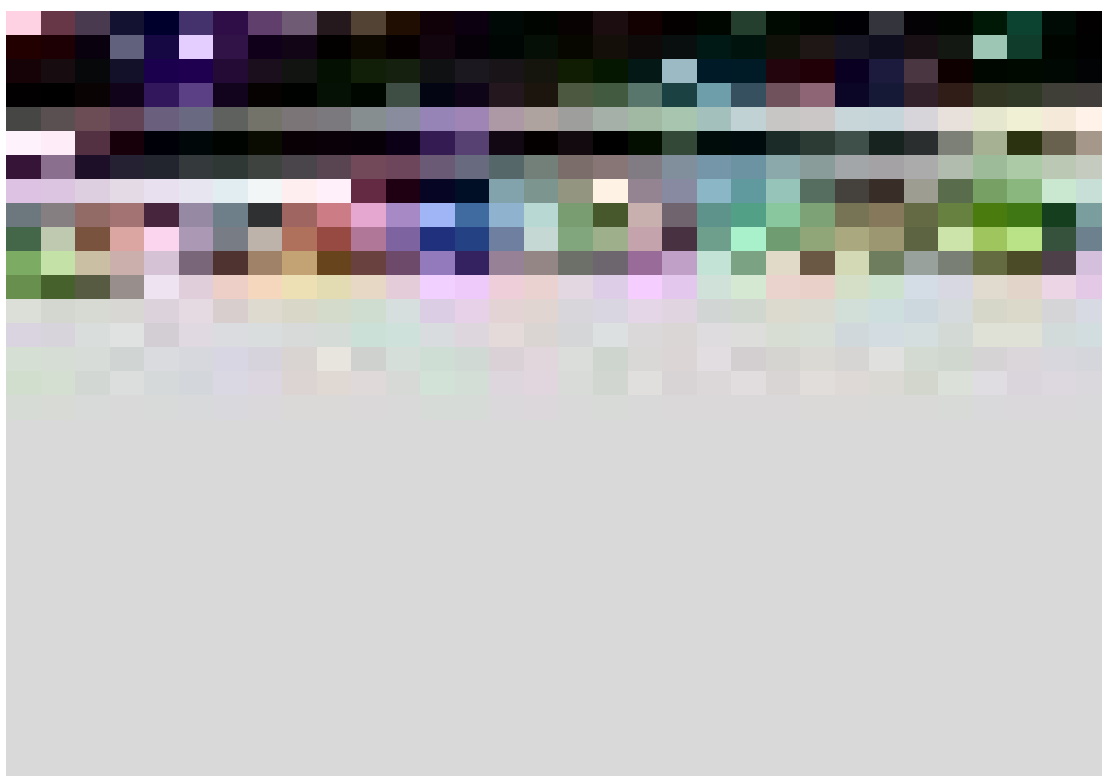

$^{13}\text{C}$  NMR of **3-2**

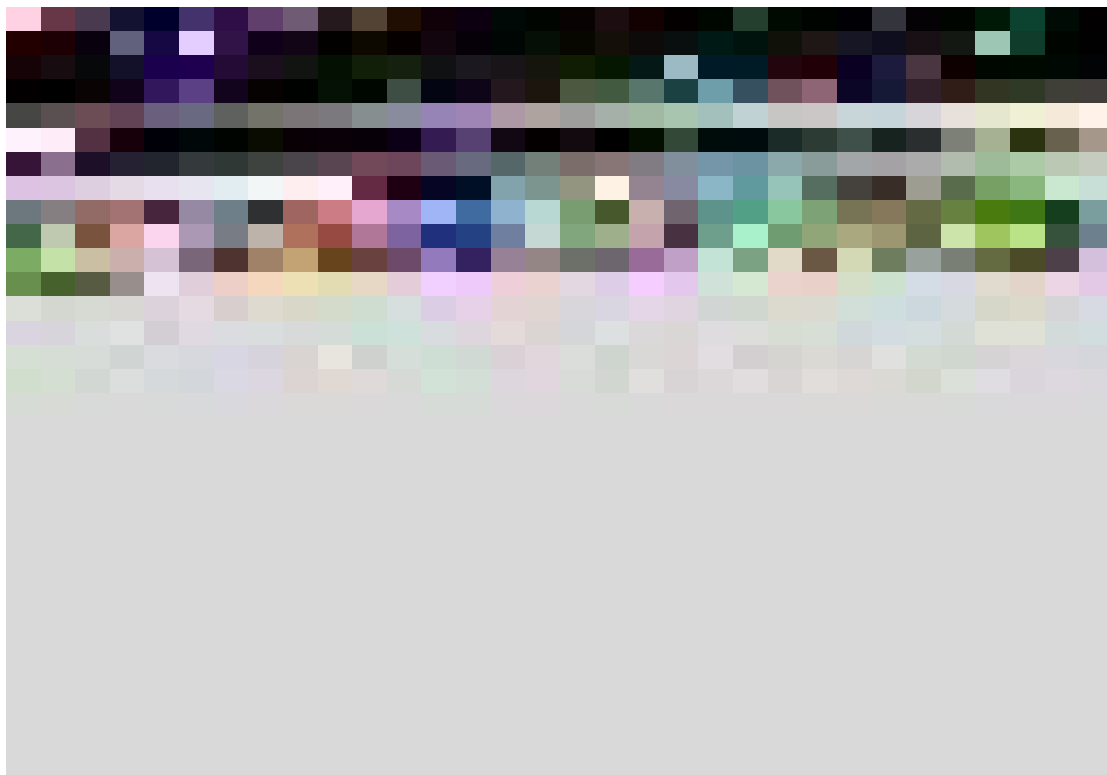

$^1\text{H}$  NMR of **3-3** (P1, trans)

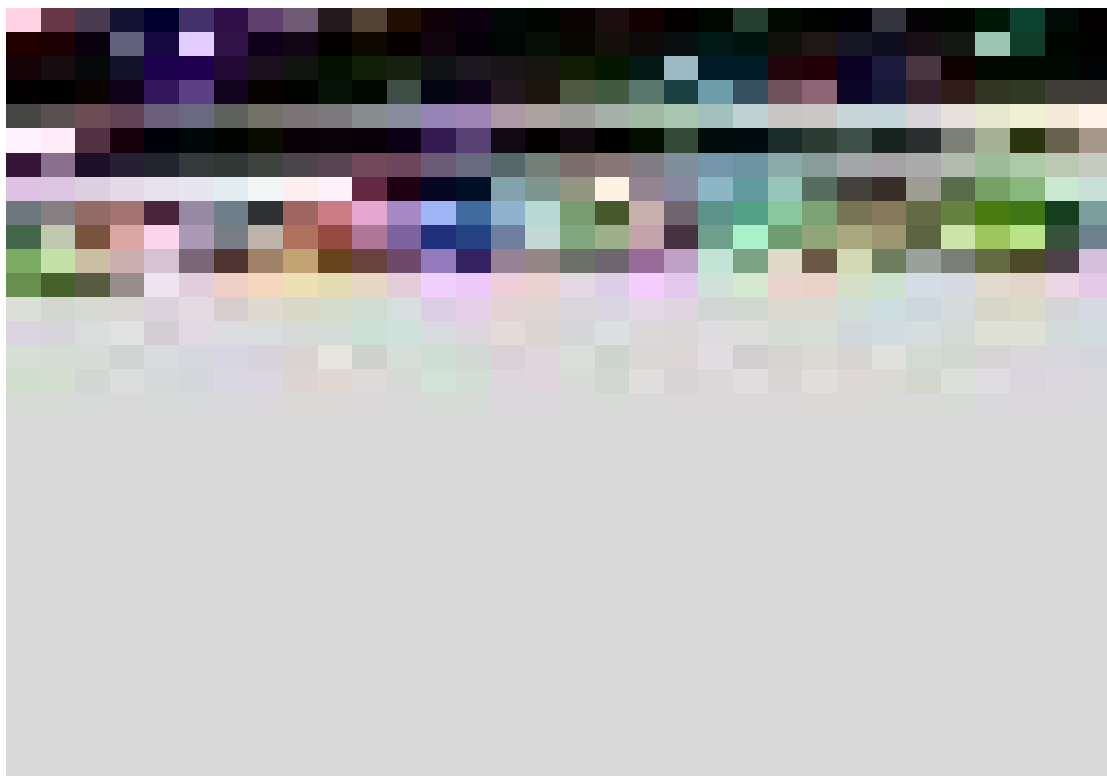

$^{13}\text{C}$  NMR of **3-3** (P1, trans)

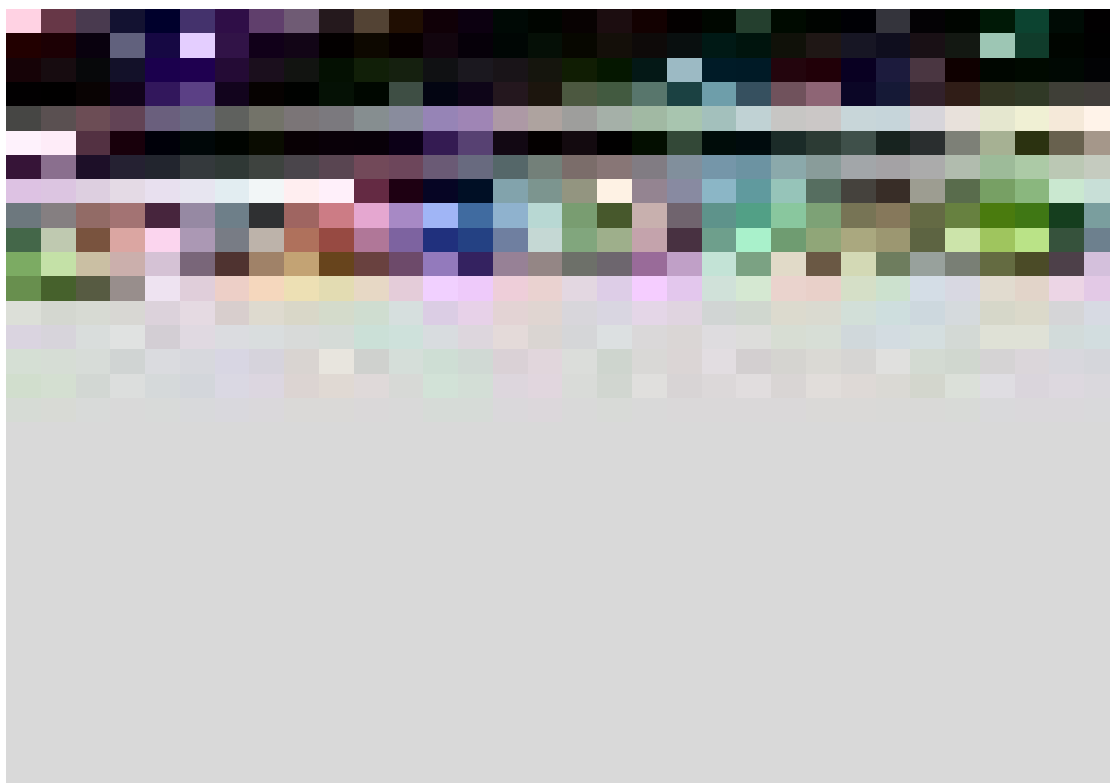

$^1\text{H}$  NMR of **3-3** (P2, cis)

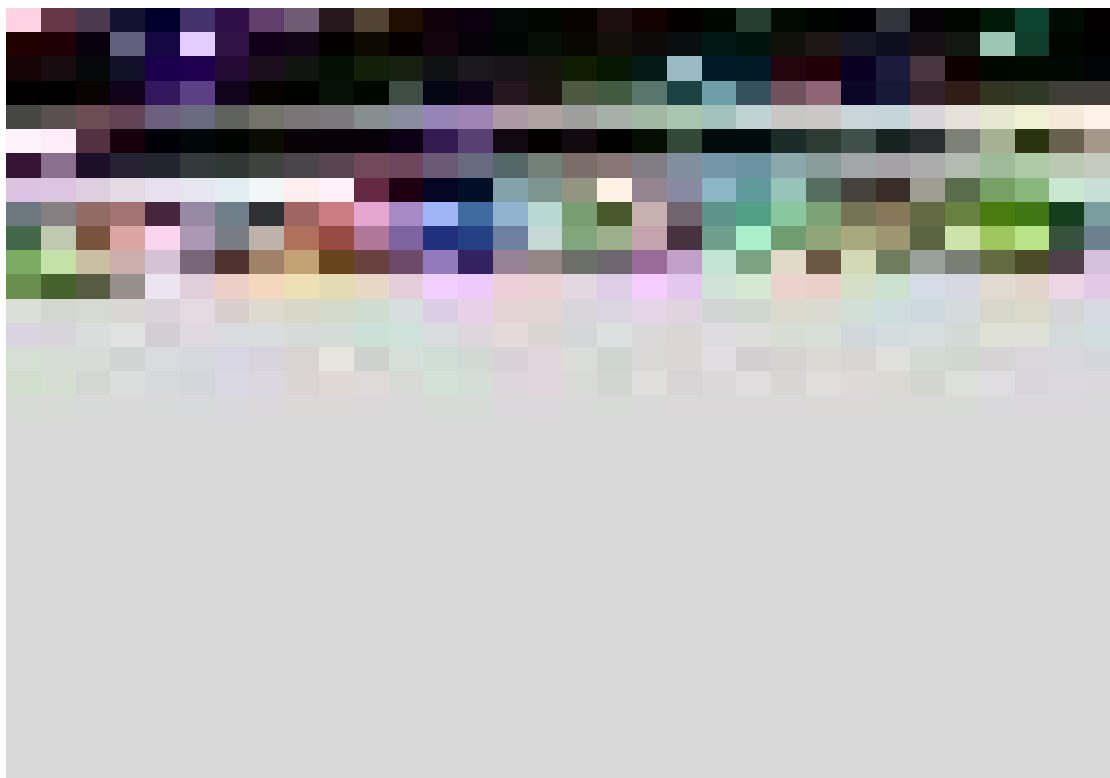

$^{13}\text{C}$  NMR of **3-3** (P2, cis)

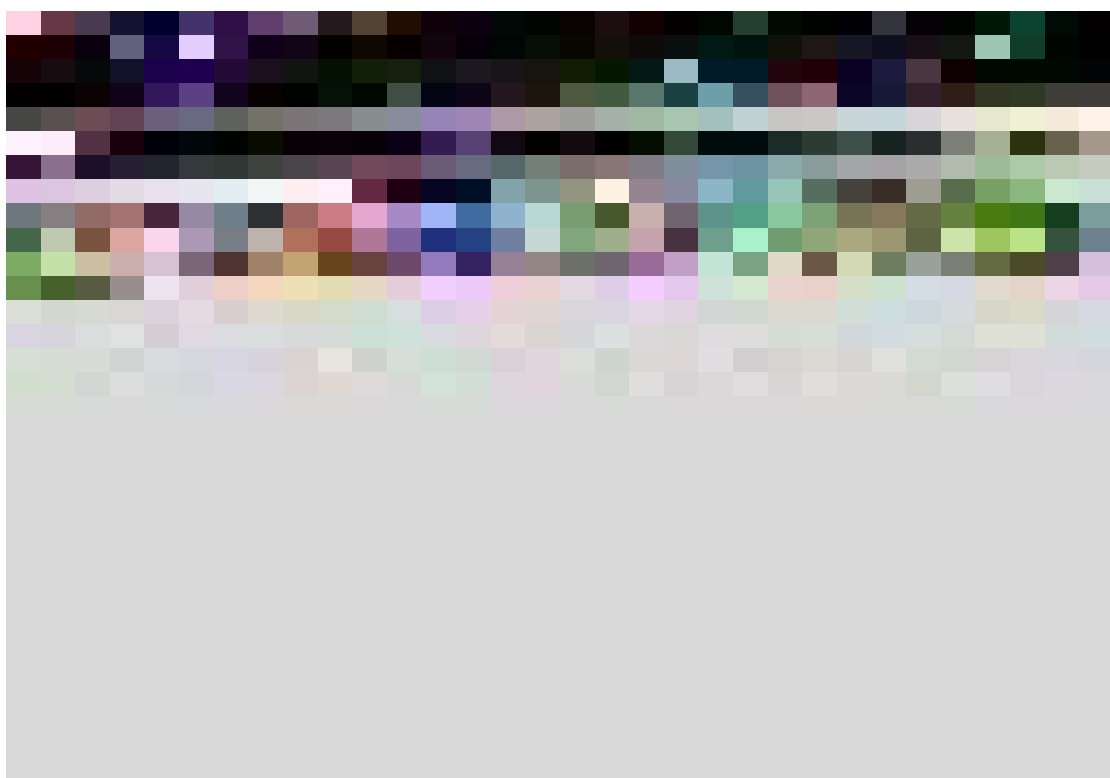

$^1\text{H}$  NMR of 3-4

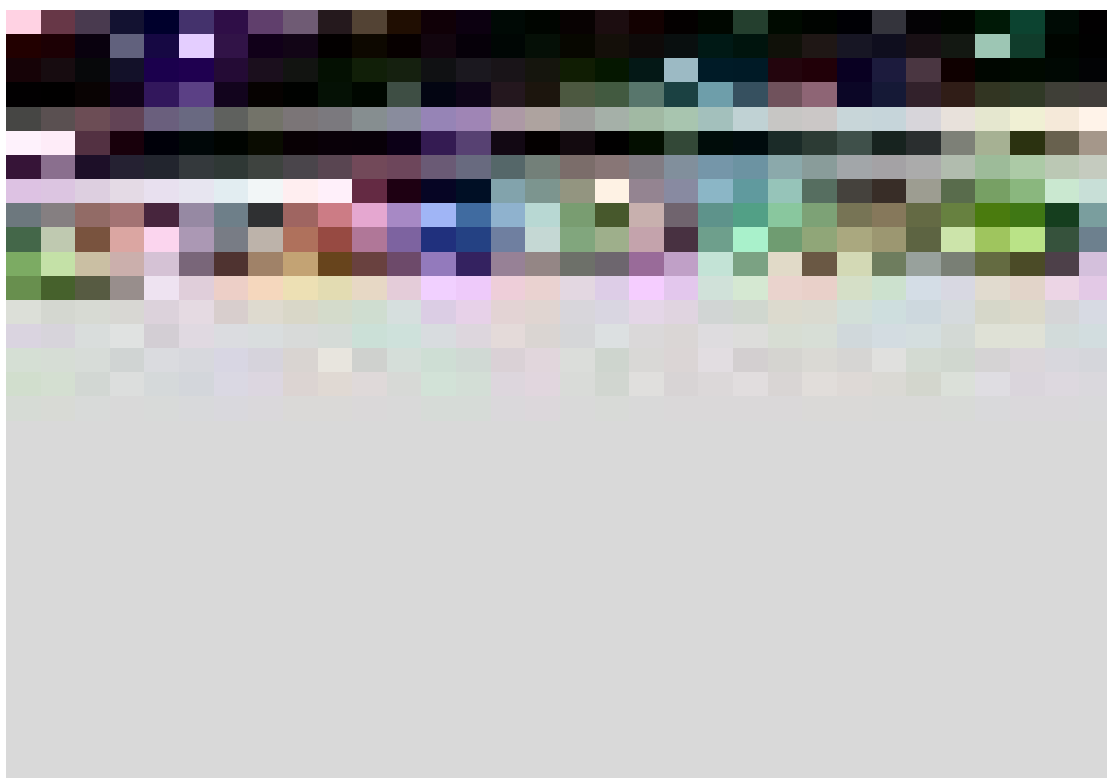

$^{13}\text{C}$  NMR of 3-4

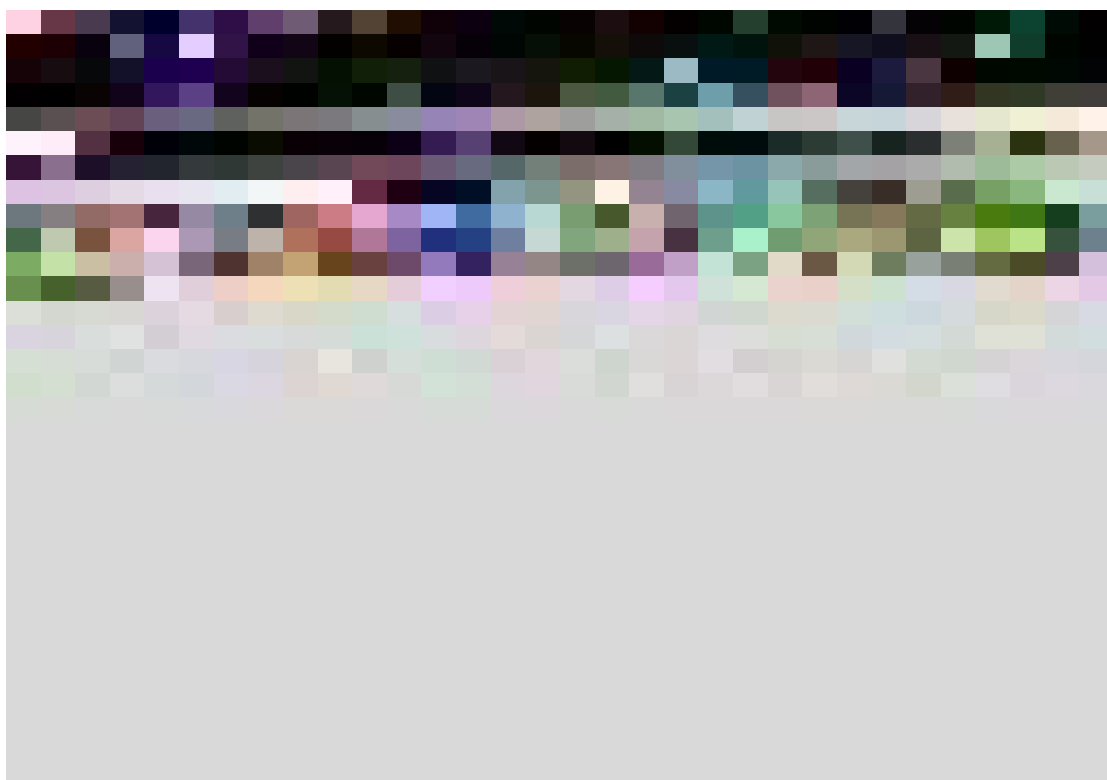

$^1\text{H}$  NMR of 3-5

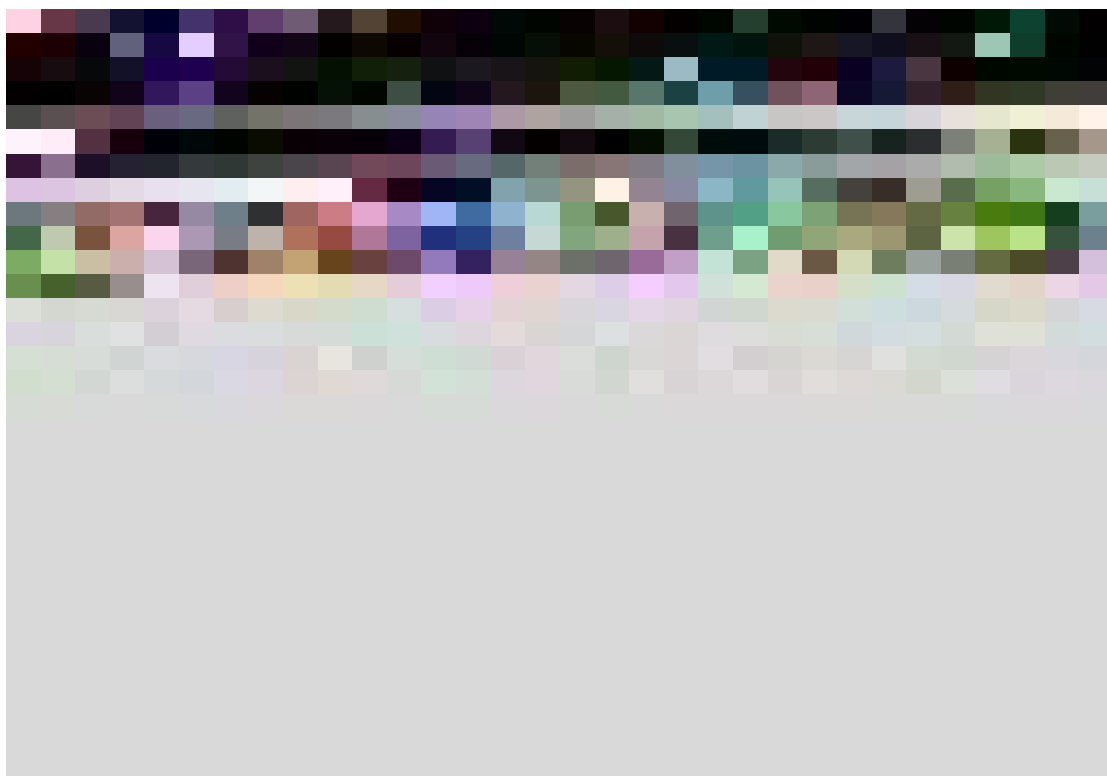

$^{13}\text{C}$  NMR of 3-5

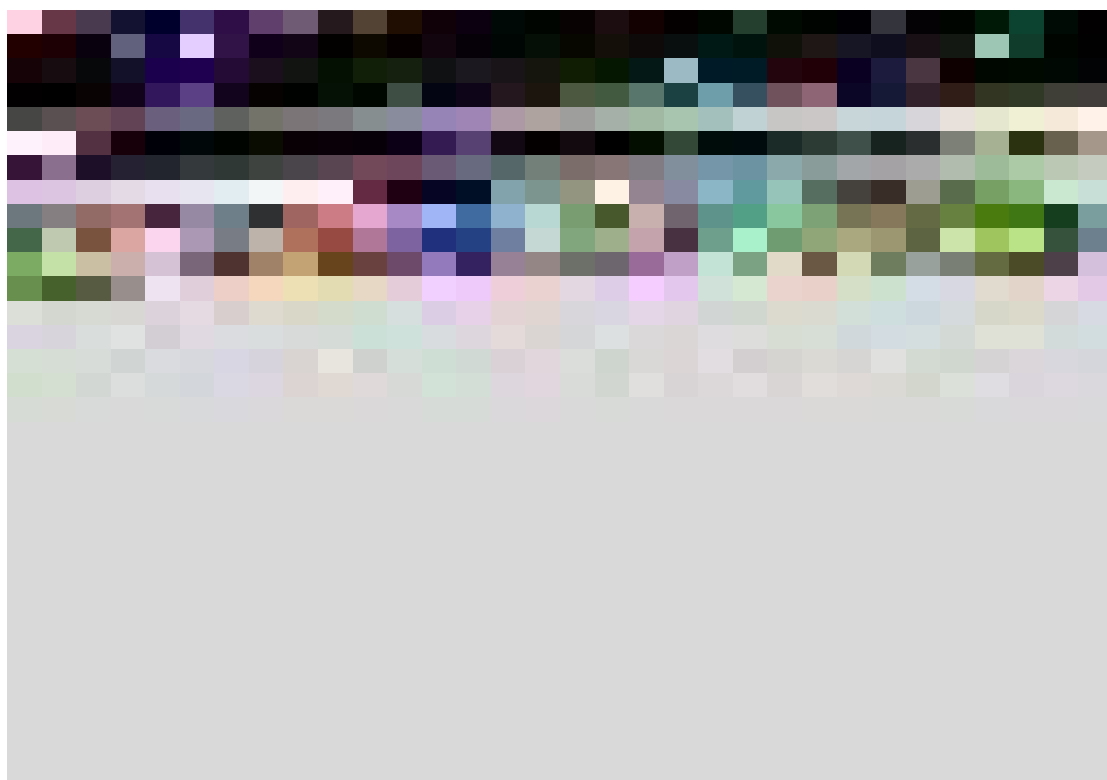



$^1\text{H}$  NMR of **3-6**

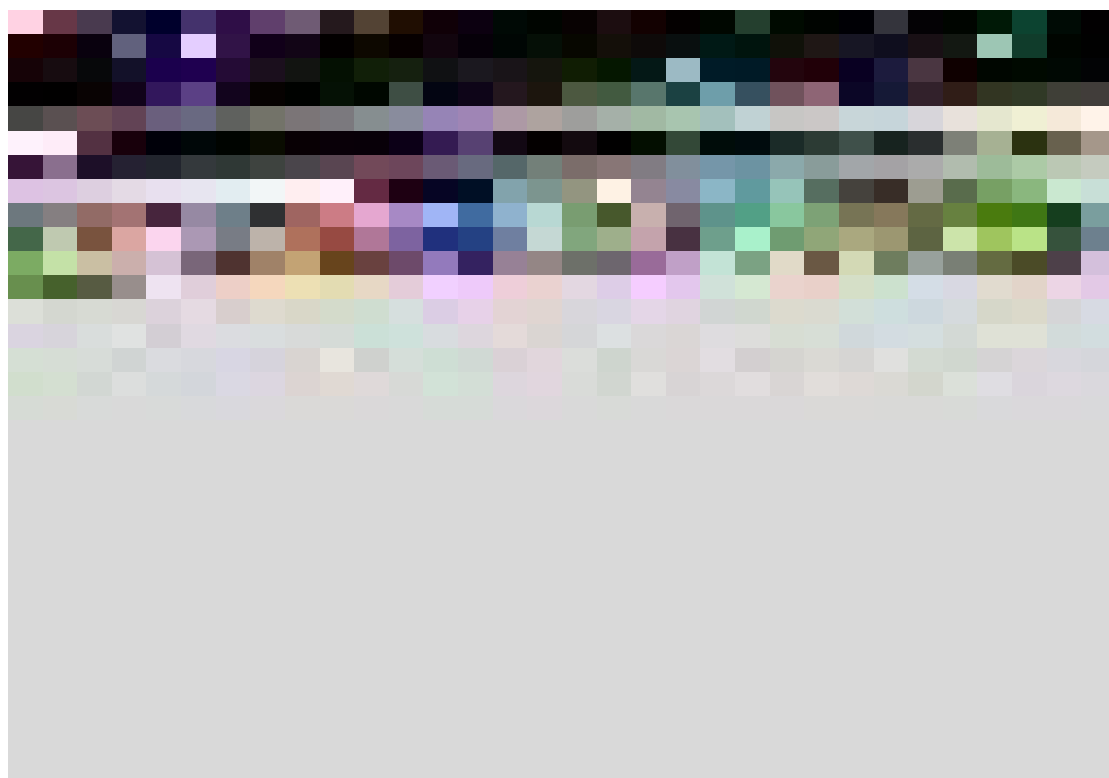

$^{13}\text{C}$  NMR of **3-6**



$^{19}\text{F}$  NMR of **3-6**

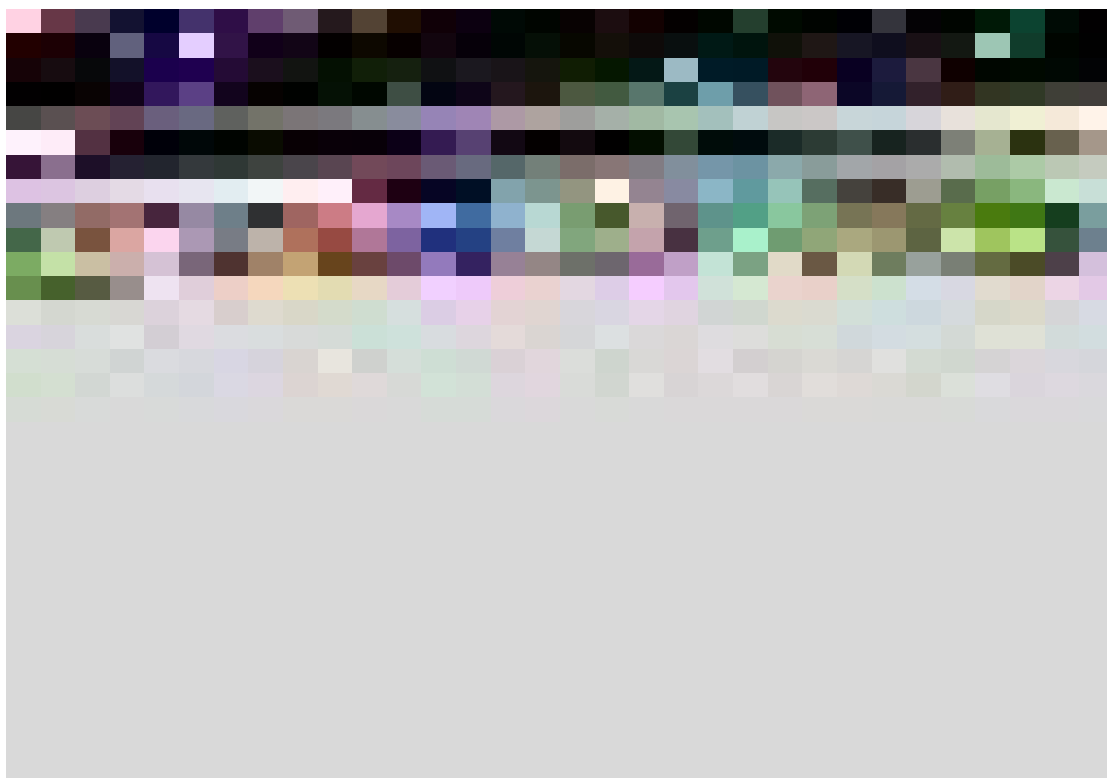

$^1\text{H}$  NMR of **3-7**



$^{13}\text{C}$  NMR of **3-7**

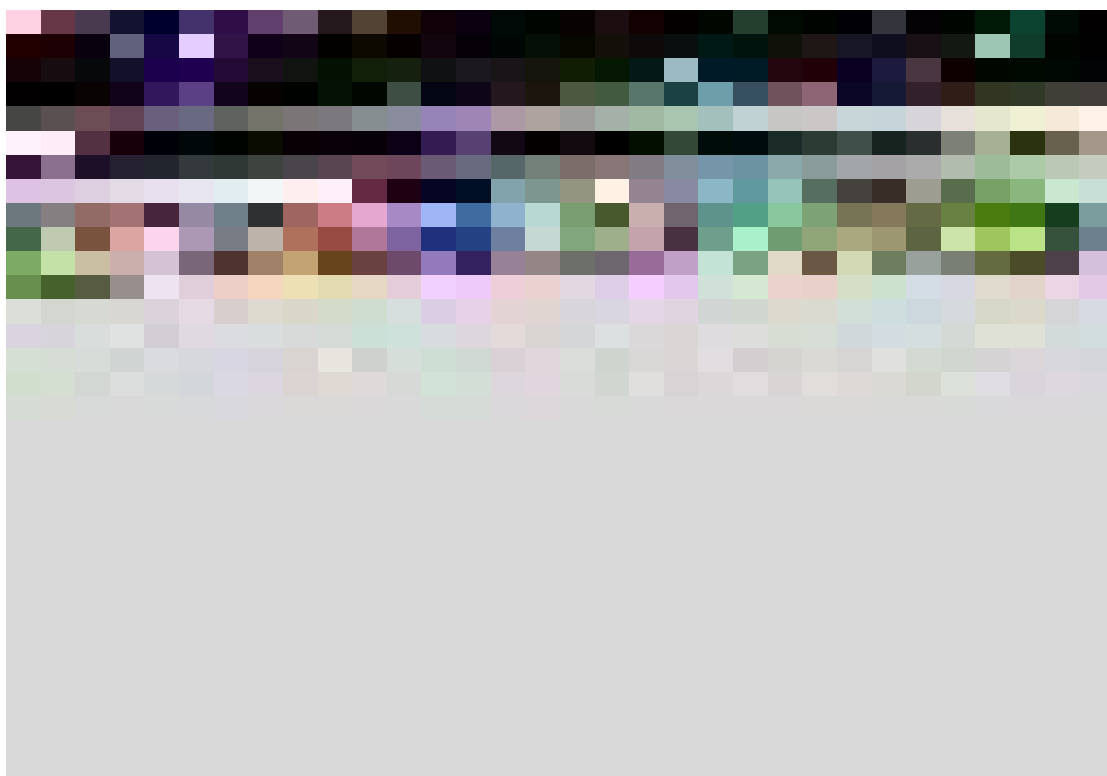

$^{19}\text{F}$  NMR of **3-7**

$^1\text{H}$  NMR of **3-8**

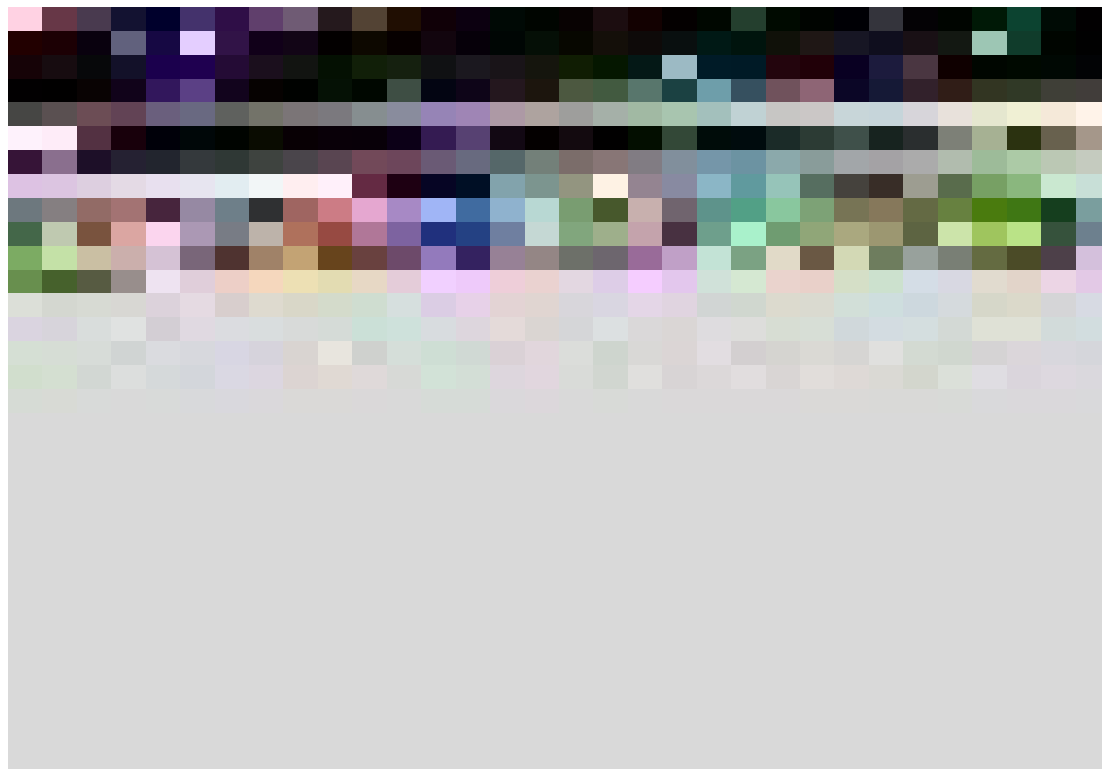

$^{13}\text{C}$  NMR of **3-8**

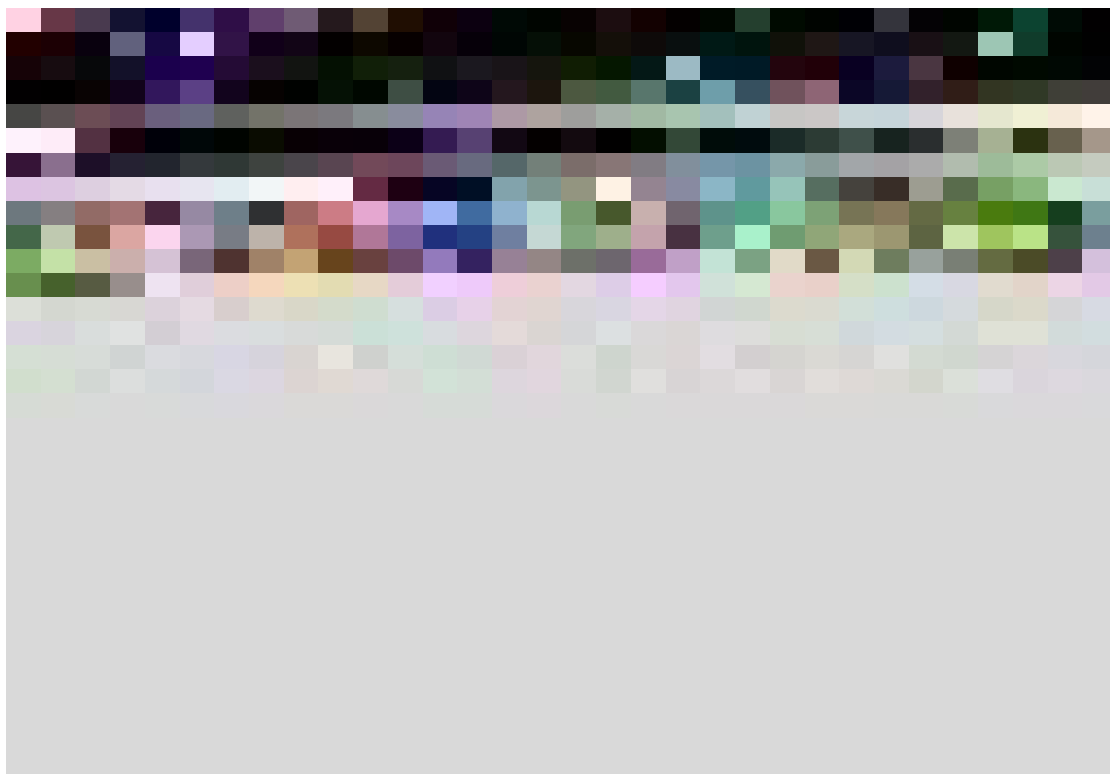

$^{19}\text{F}$  NMR of **3-8**

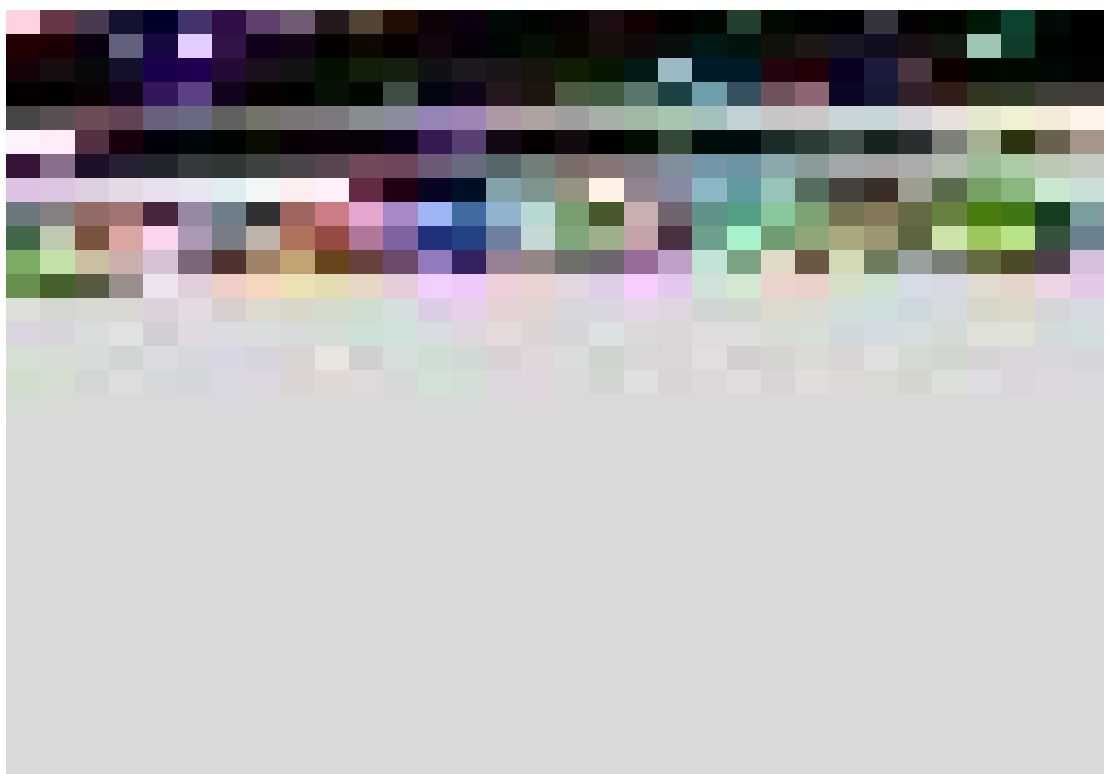

$^1\text{H}$  NMR of **3-9**

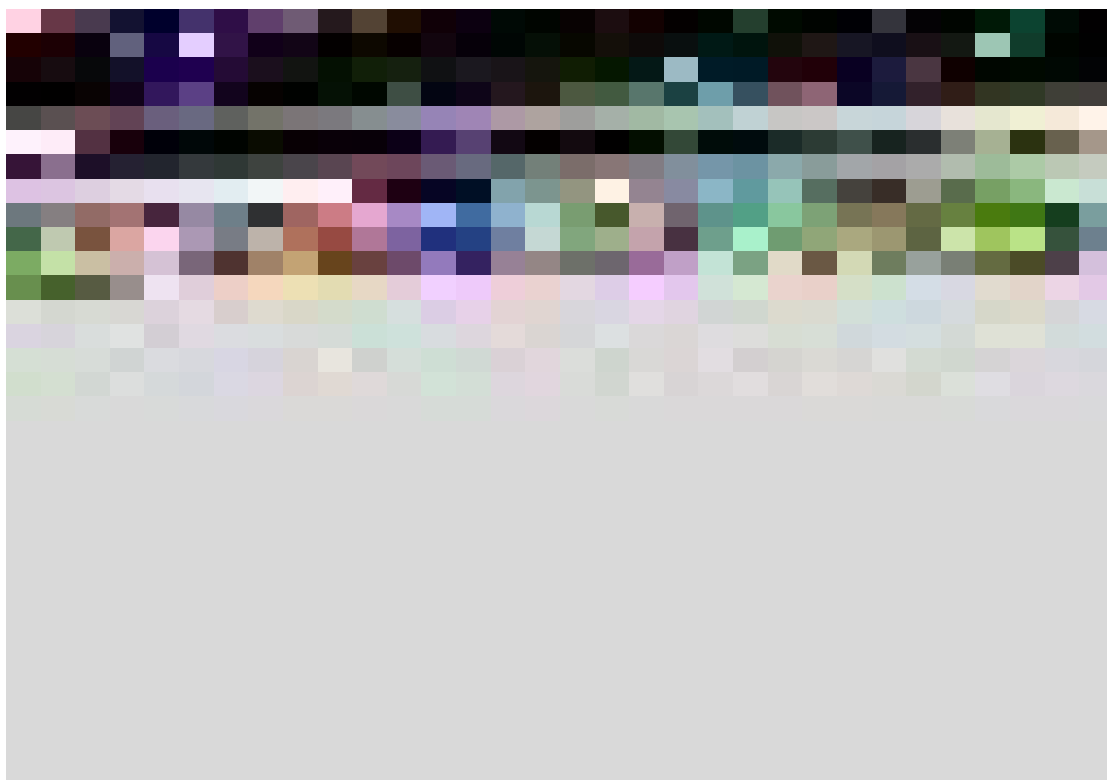

$^{13}\text{C}$  NMR of **3-9**

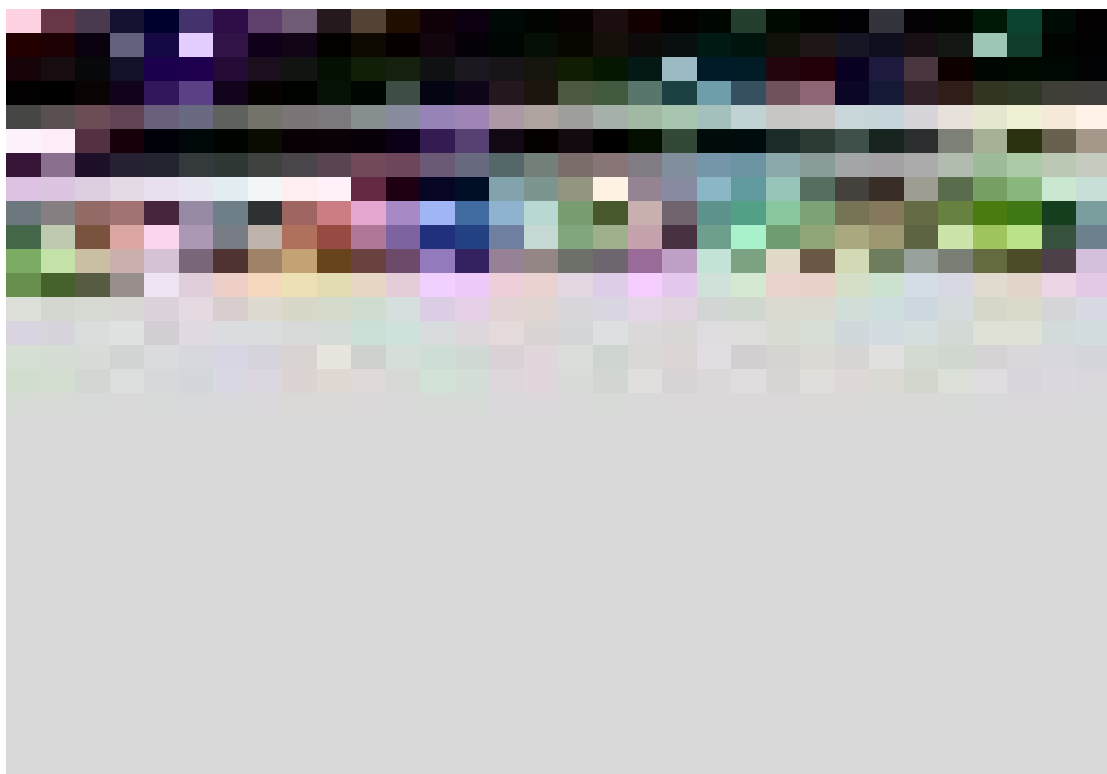

$^1\text{H}$  NMR of **3-10**

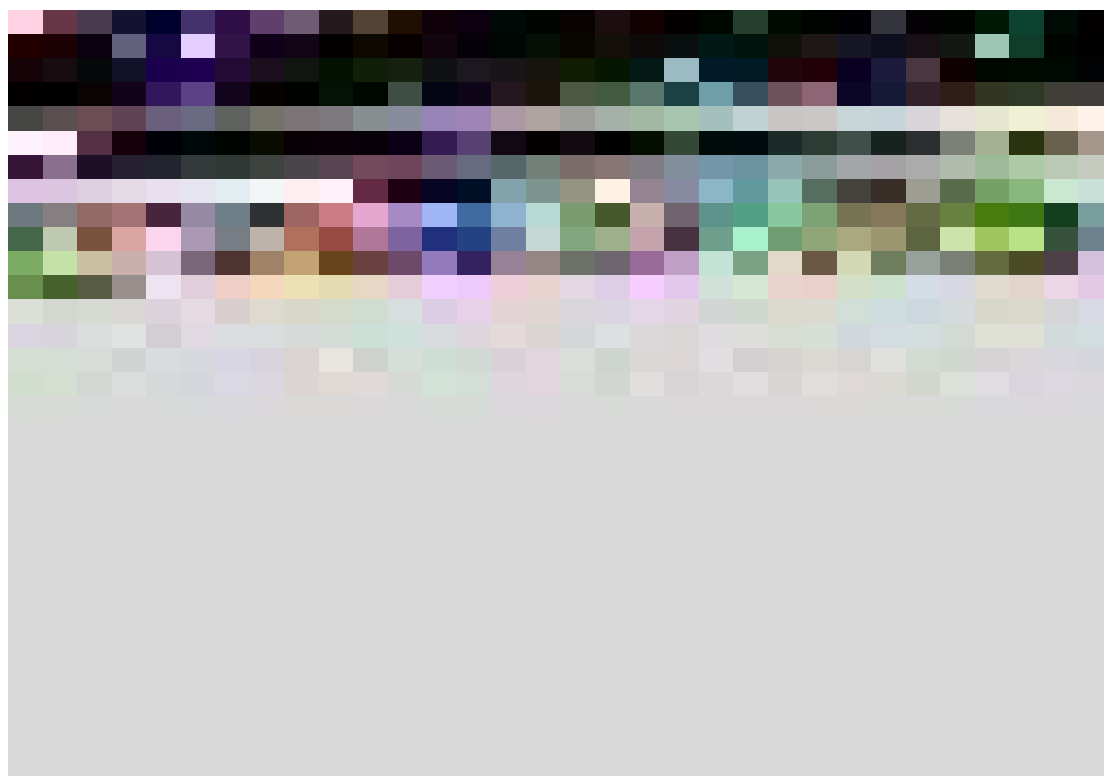

$^{13}\text{C}$  NMR of **3-10**

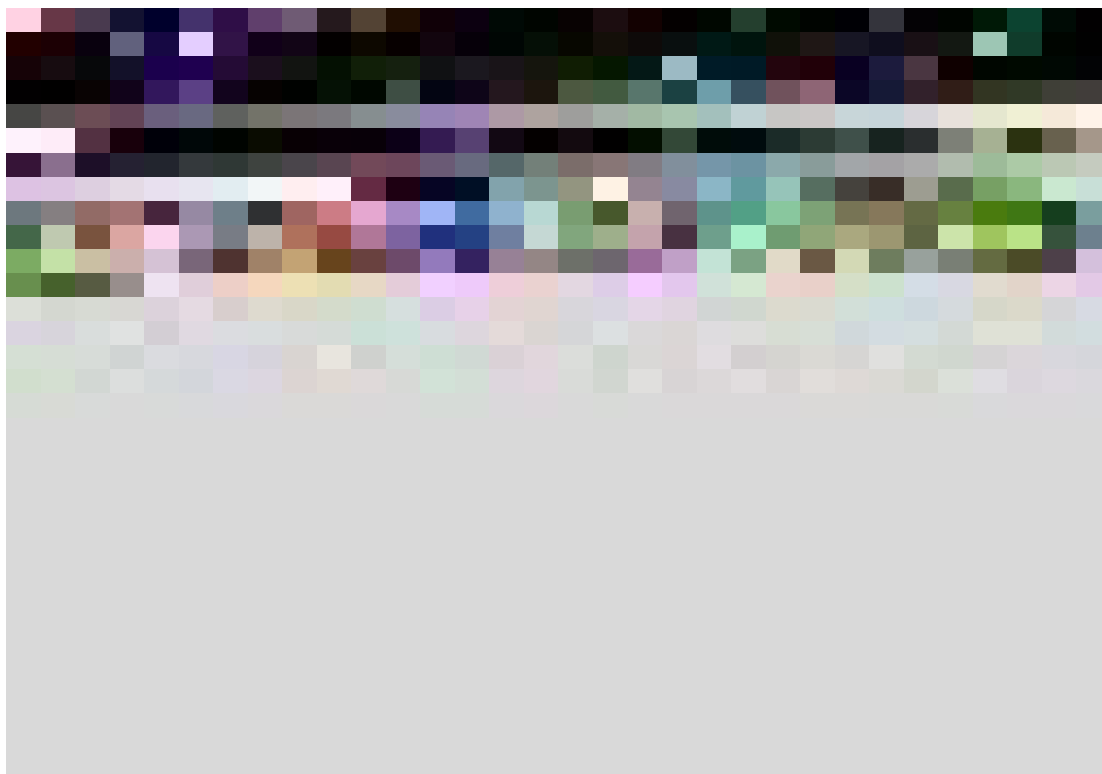

$^1\text{H}$  NMR of **3-11** (small polarity)

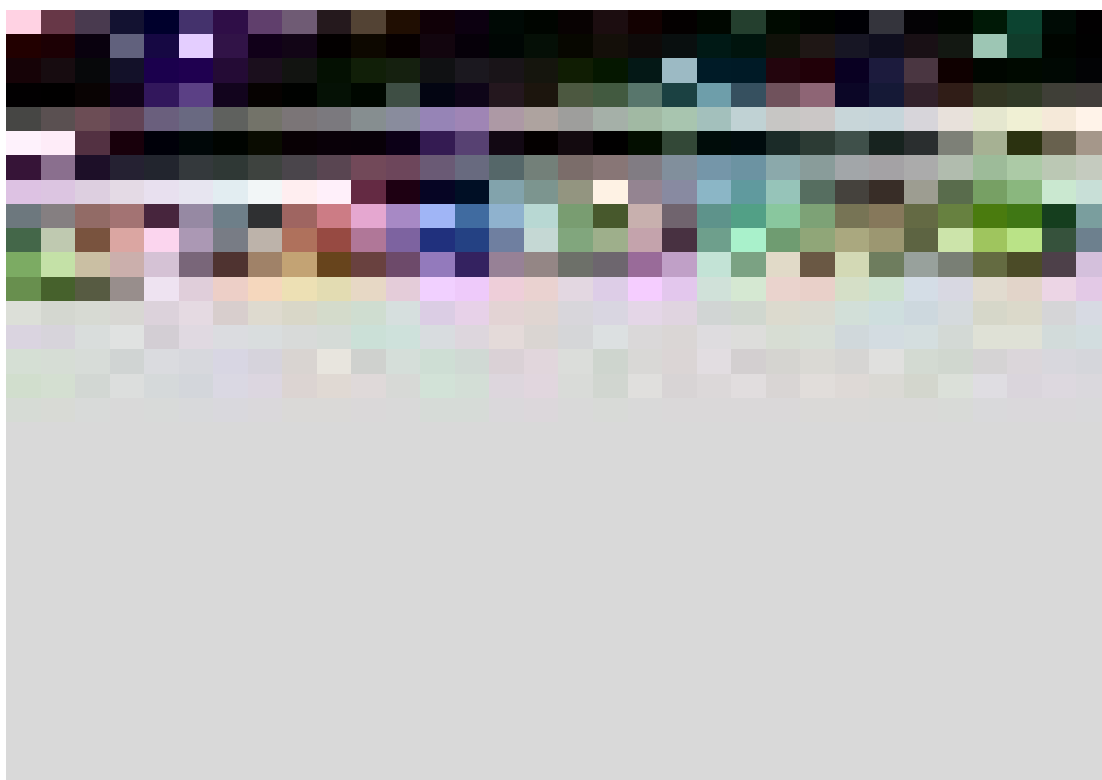

$^{13}\text{C}$  NMR of **3-11** (small polarity)





$^1\text{H}$  NMR of **3-11** (big polarity)

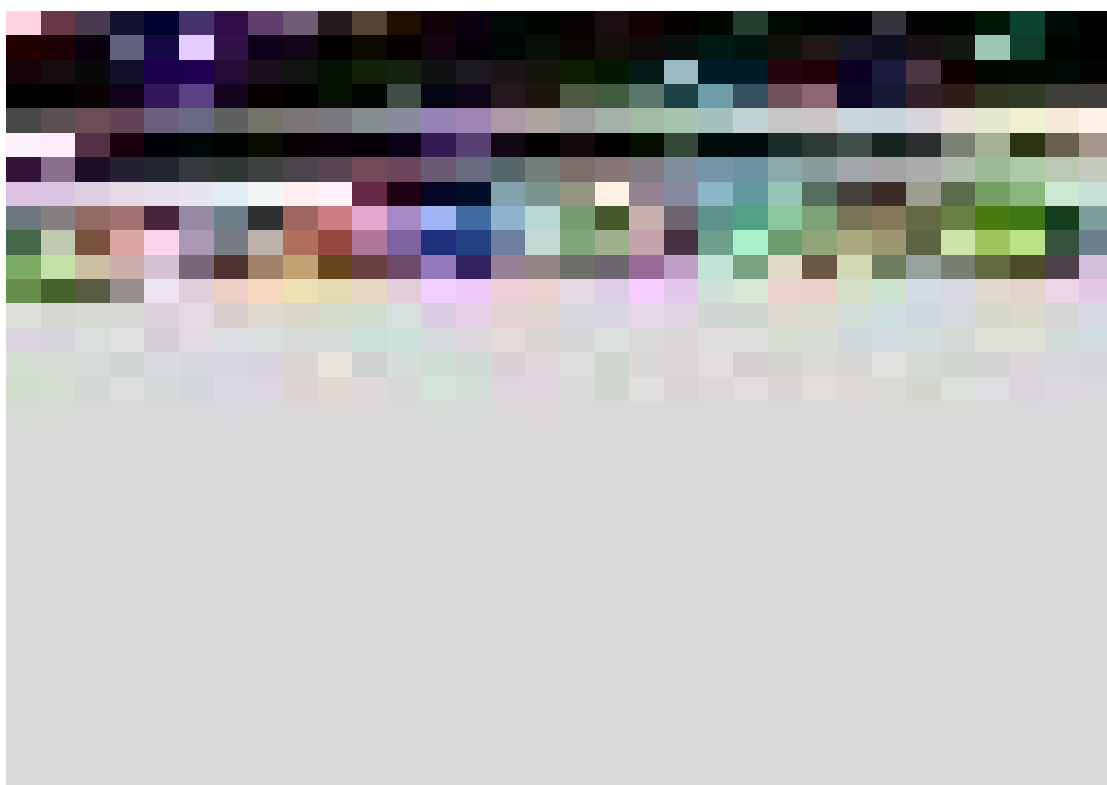

$^1\text{H}$  NMR of **3-11** (big polarity)

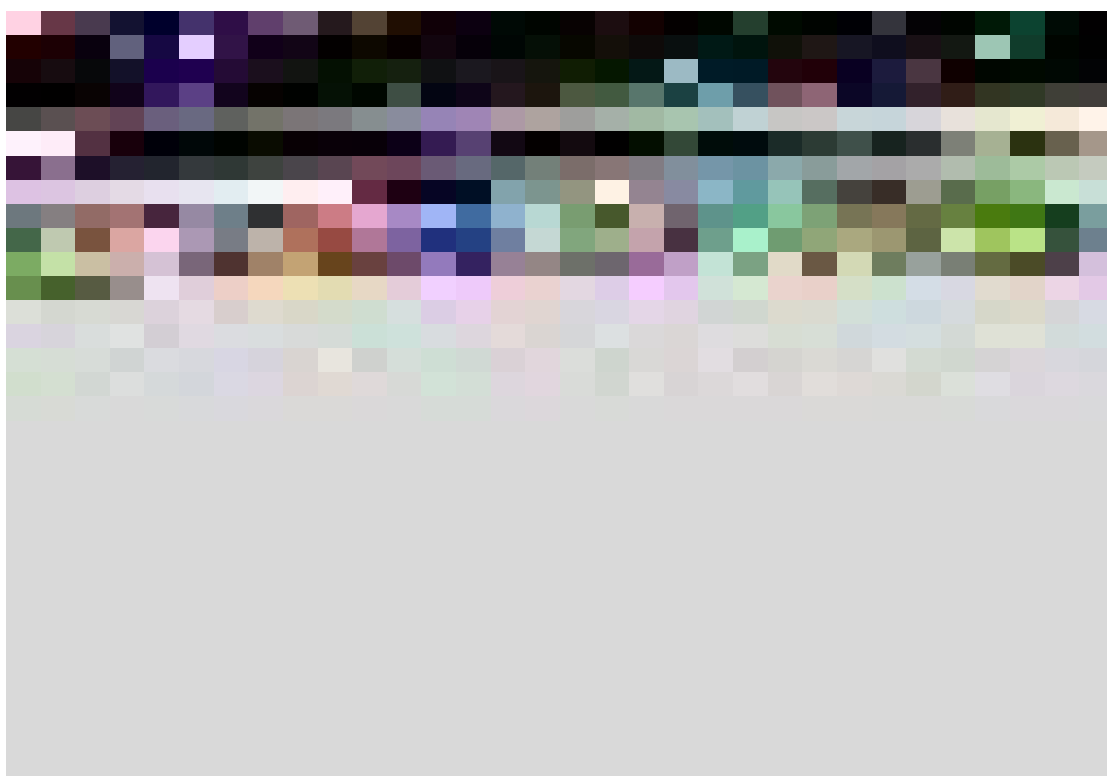

$^1\text{H}$  NMR of **3-12**

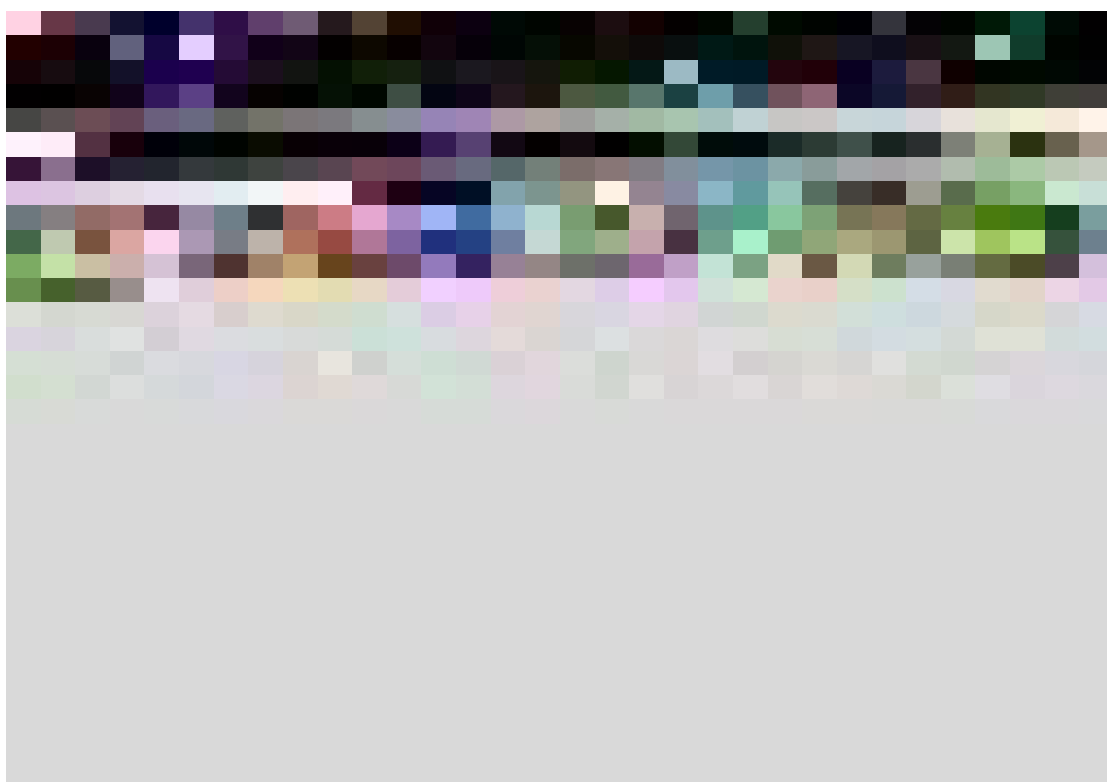

$^{13}\text{C}$  NMR of **3-12**

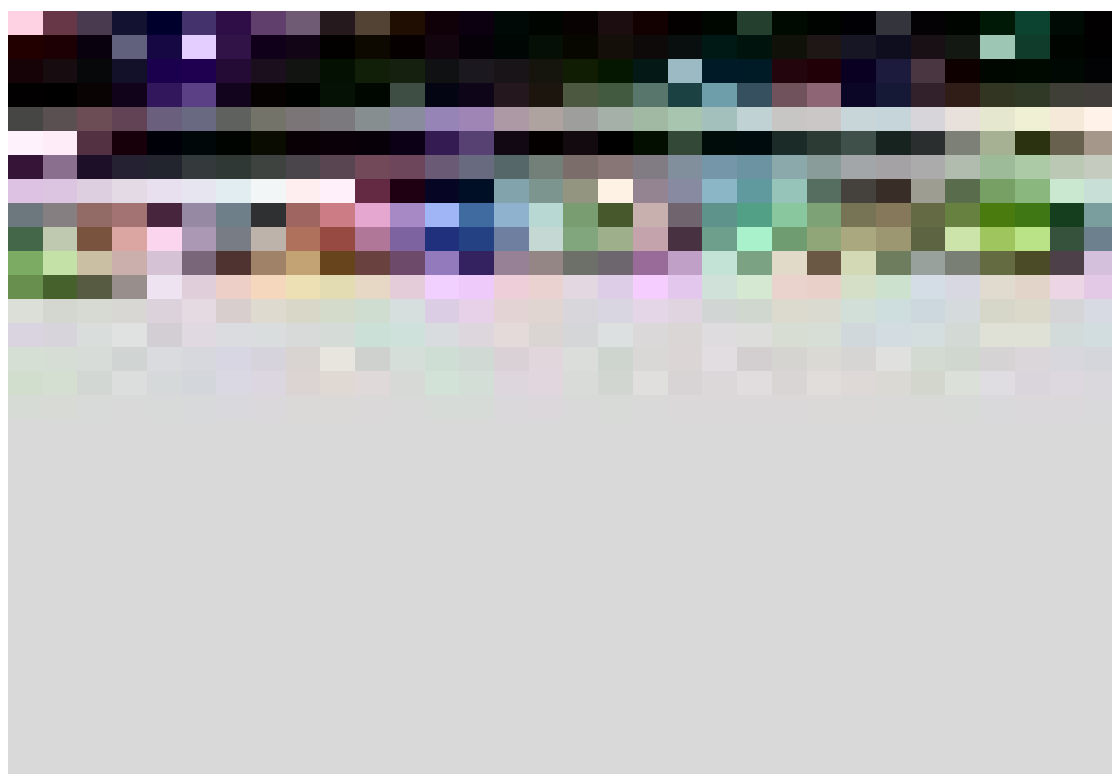

$^1\text{H}$  NMR of **3-13**



$^{13}\text{C}$  NMR of **3-13**

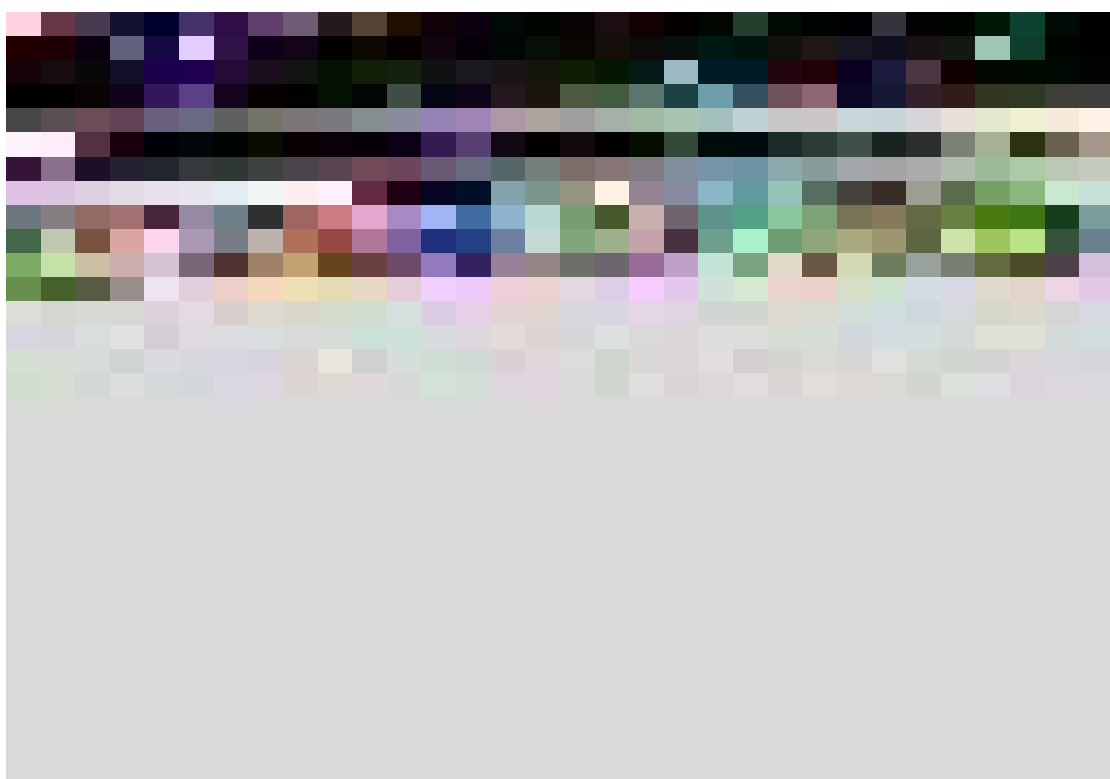

$^1\text{H}$  NMR of **3-14**

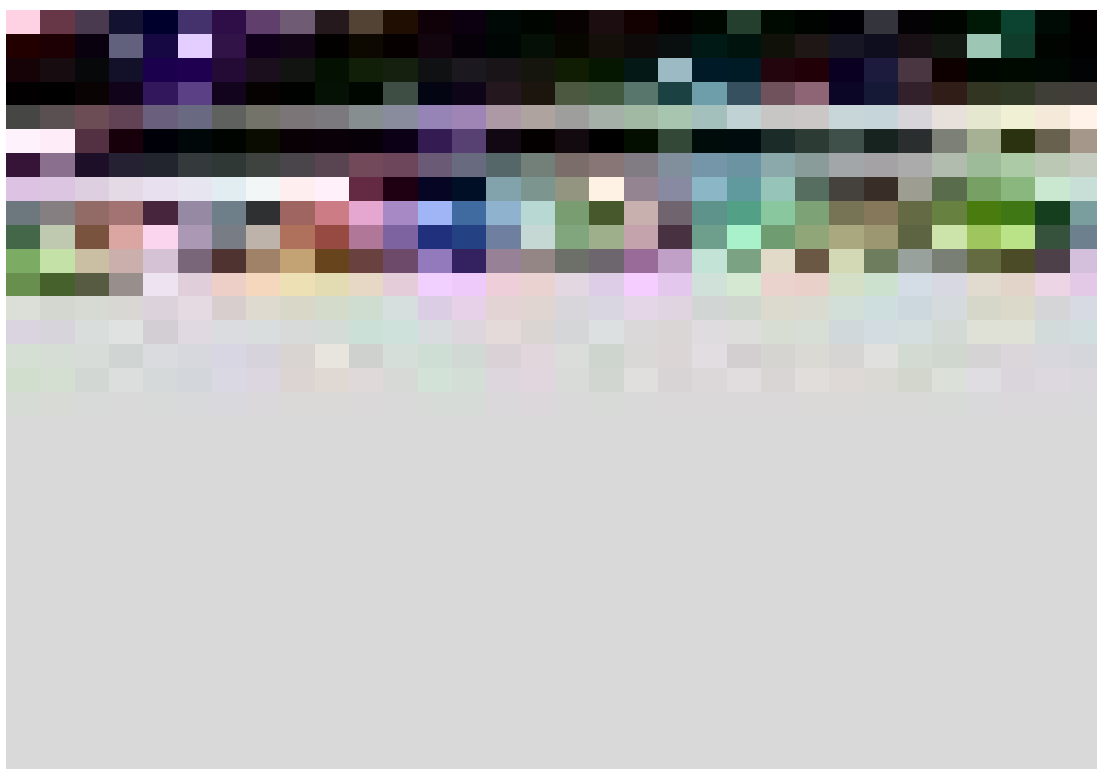

$^{13}\text{C}$  NMR of **3-14**

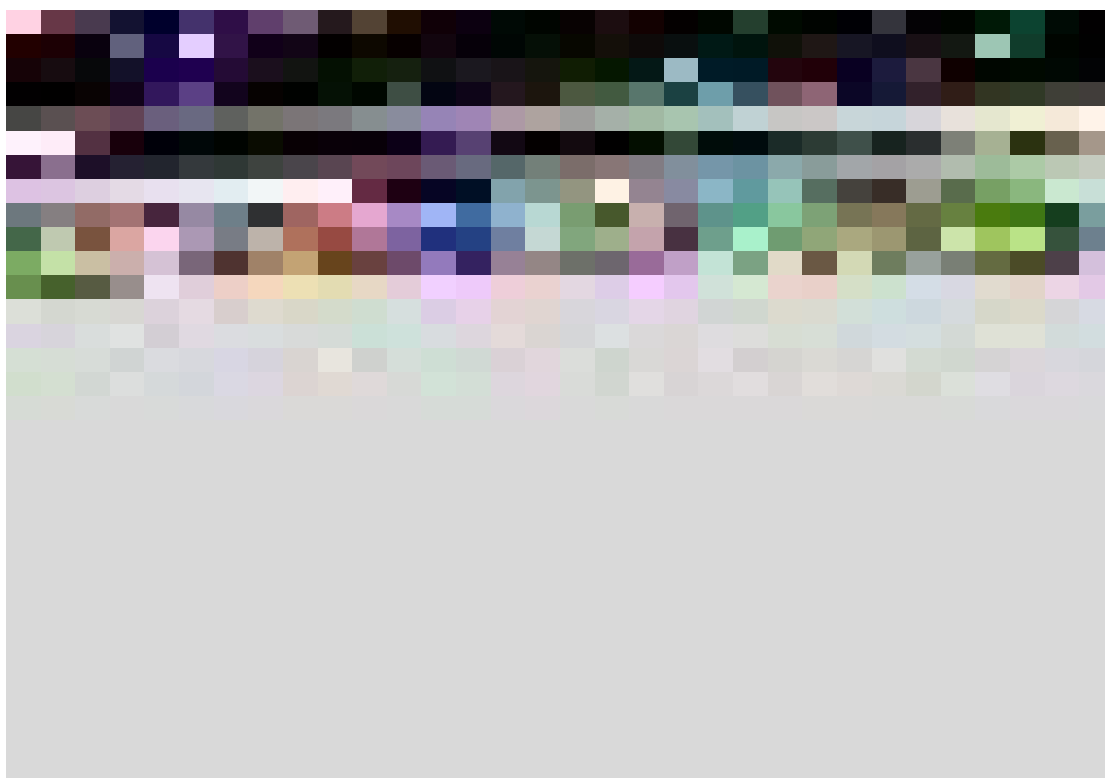

$^1\text{H}$  NMR of **3-15**



$^{13}\text{C}$  NMR of **3-15**

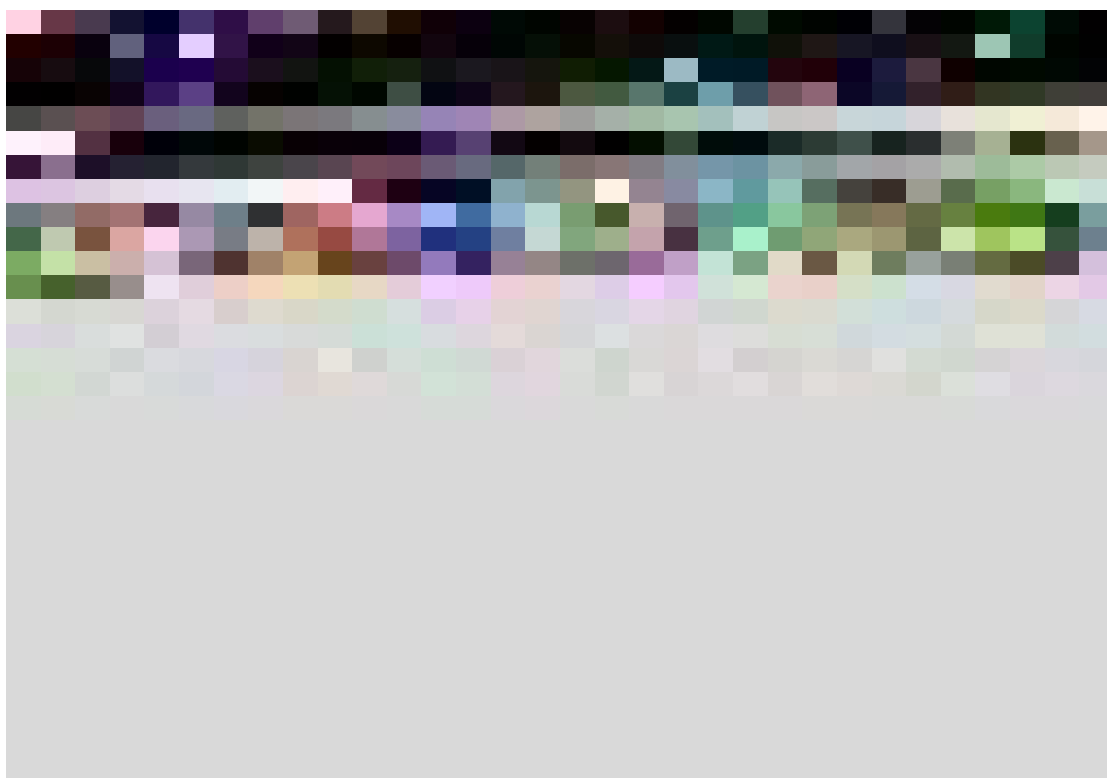

$^1\text{H}$  NMR of **3-16**



$^{13}\text{C}$  NMR of **3-16**



$^1\text{H}$  NMR of **3-17**

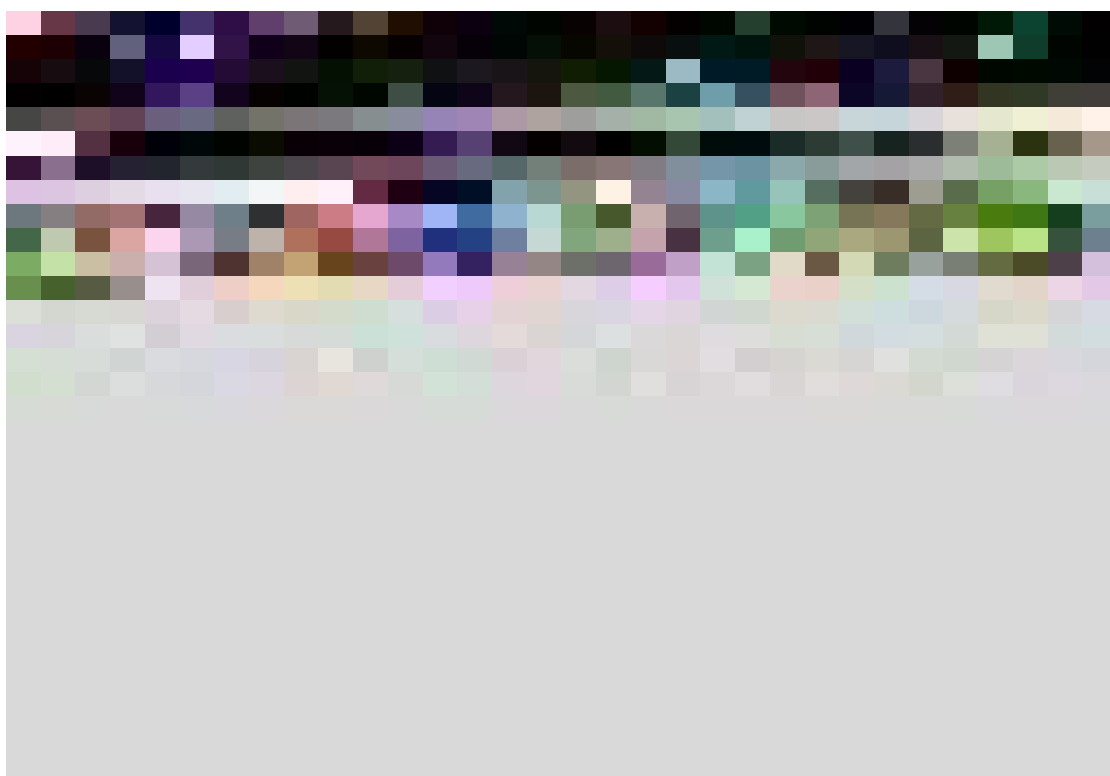

$^{13}\text{C}$  NMR of **3-17**

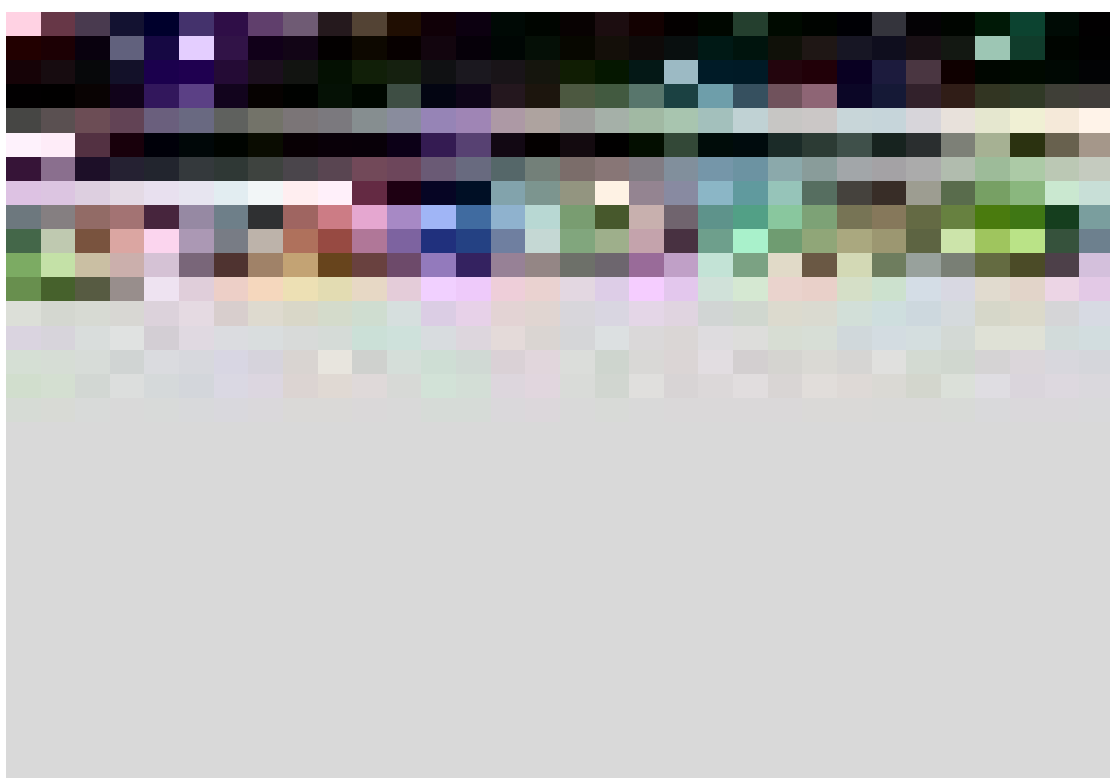



$^1\text{H}$  NMR of **3-18**

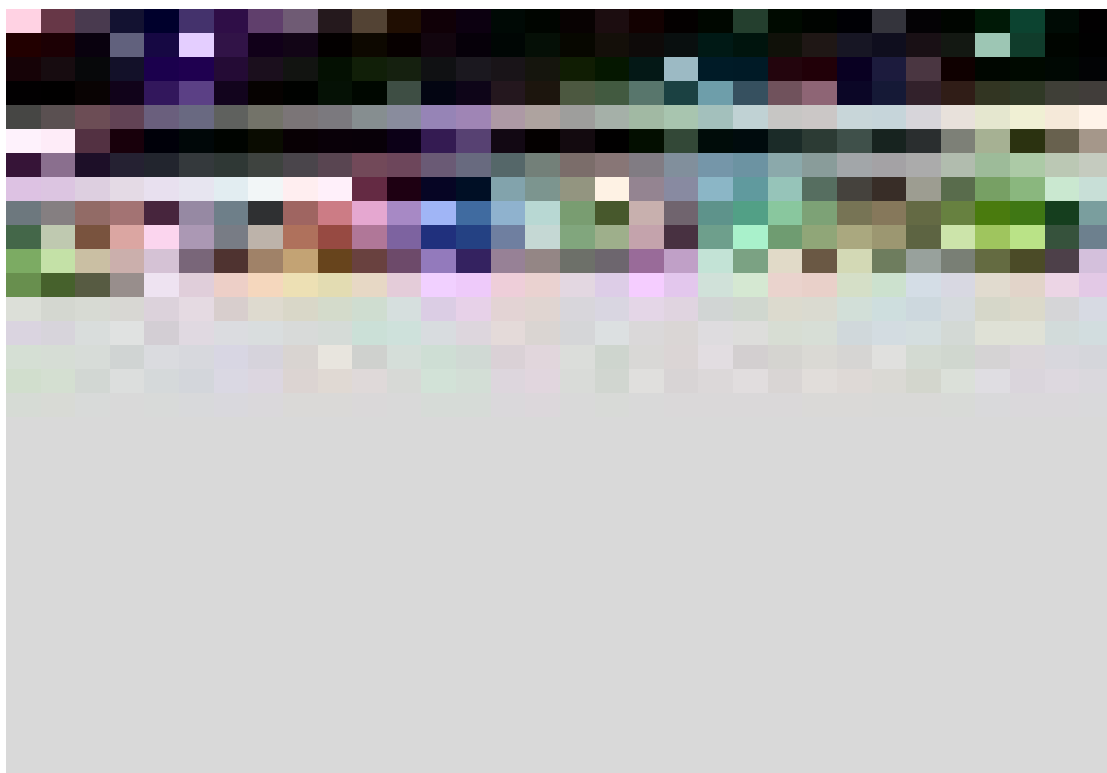

$^{13}\text{C}$  NMR of **3-18**

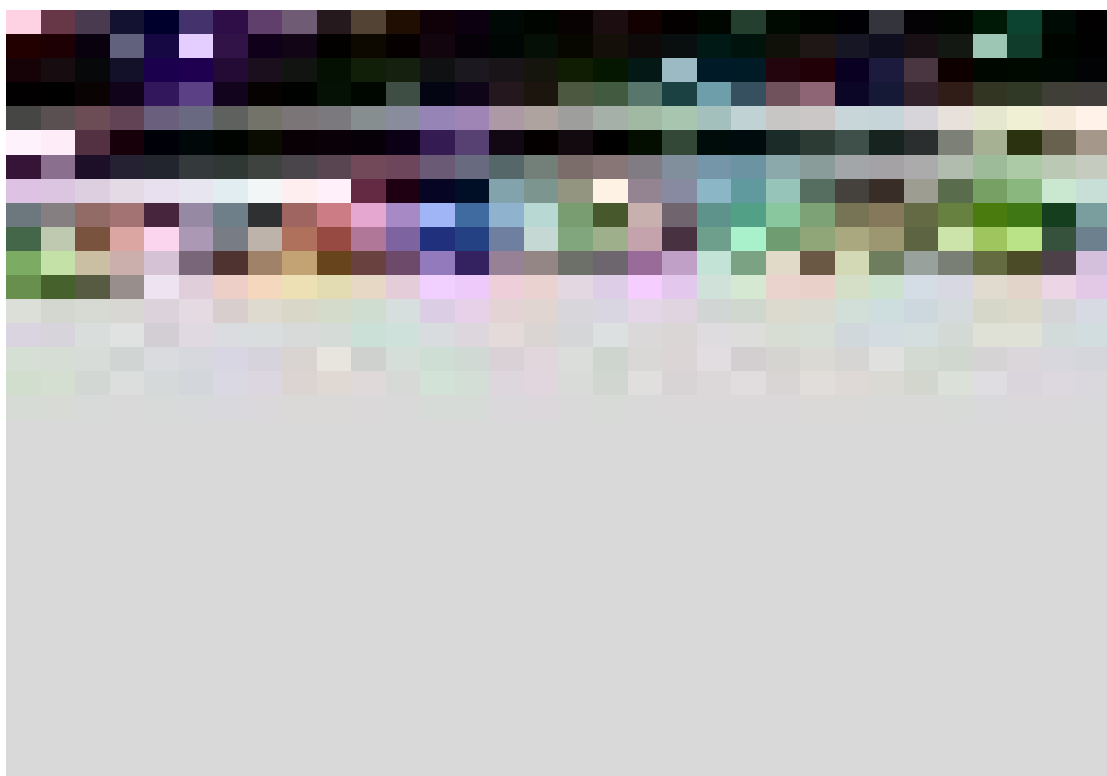

$^1\text{H}$  NMR of **3-19**

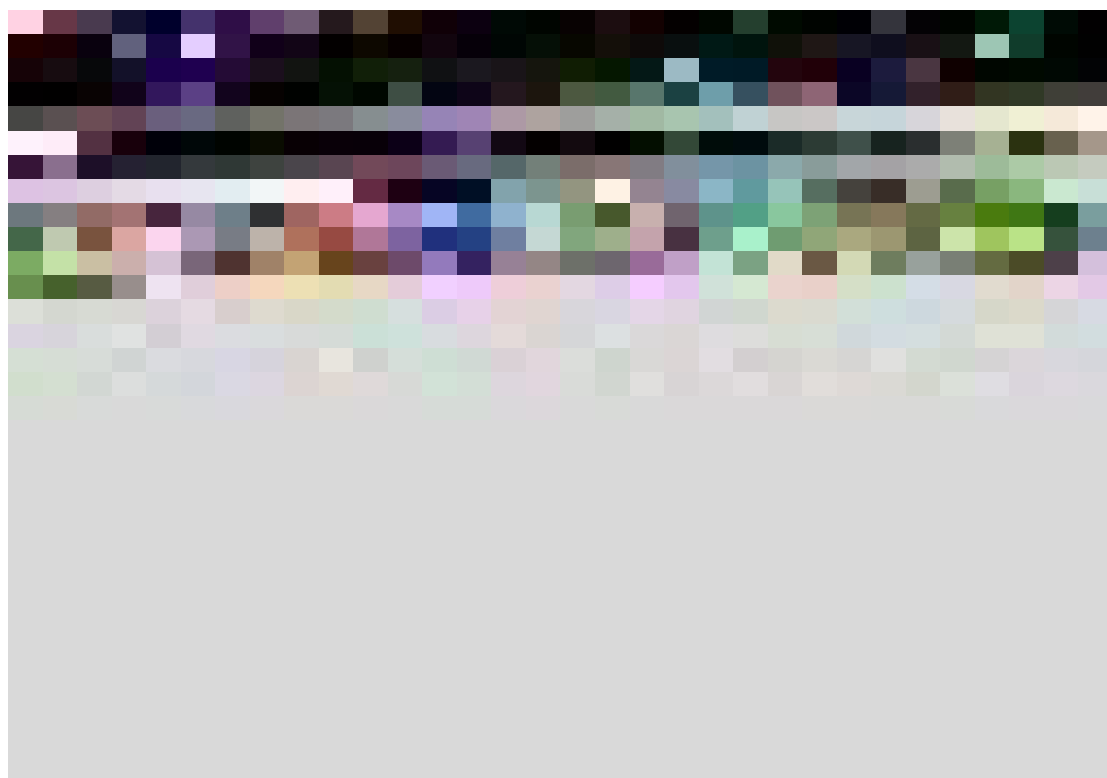

$^1\text{H}$  NMR of **3-19**



$^1\text{H}$  NMR of **3-20**



$^{13}\text{C}$  NMR of **3-20**

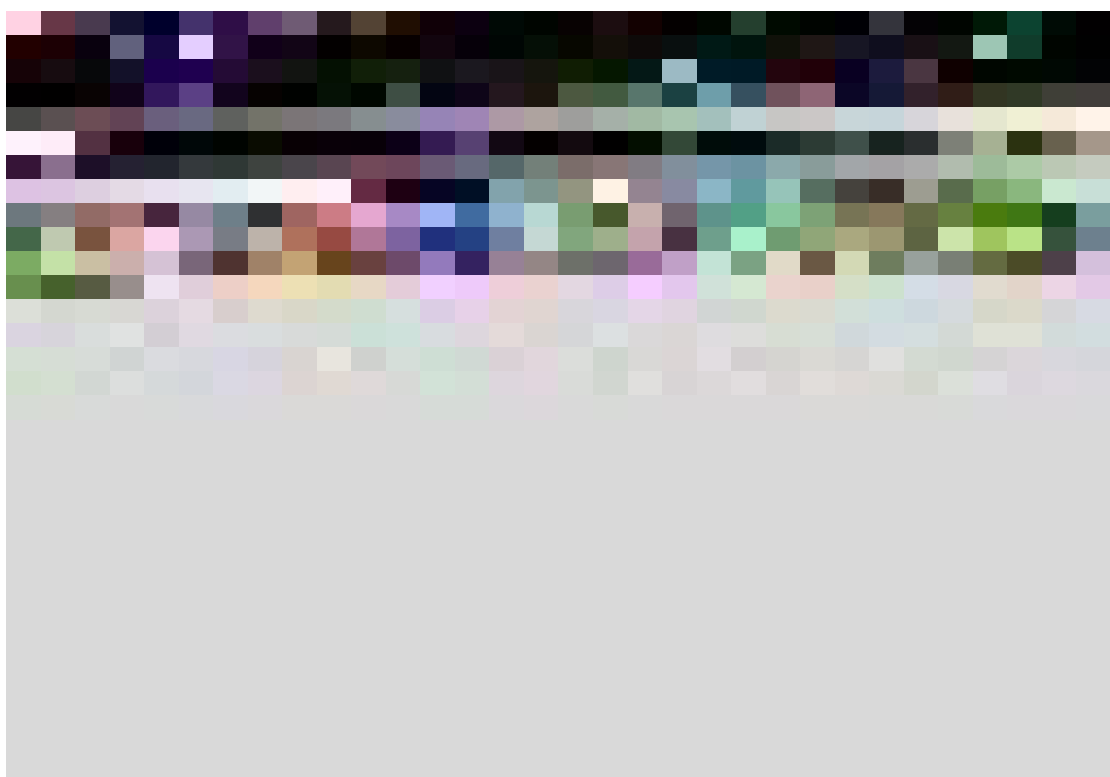

$^1\text{H}$  NMR of **3-21**

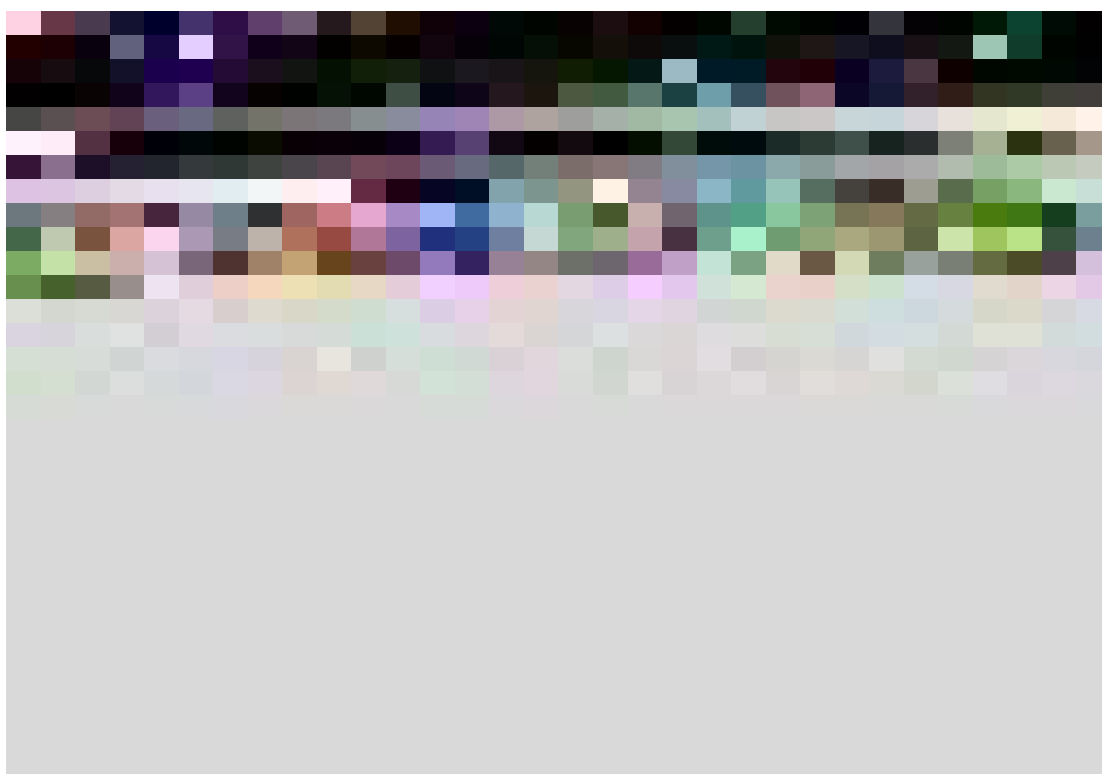

$^{13}\text{C}$  NMR of **3-21**

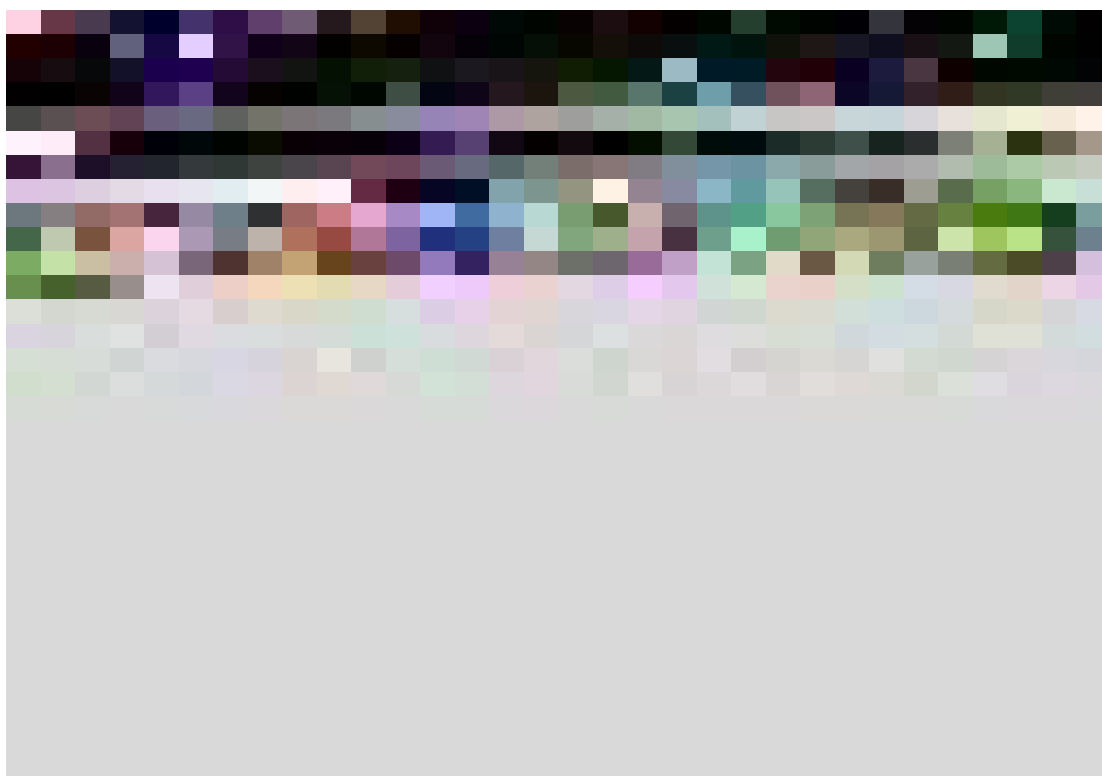

$^1\text{H}$  NMR of **3-22**



$^{13}\text{C}$  NMR of **3-22**

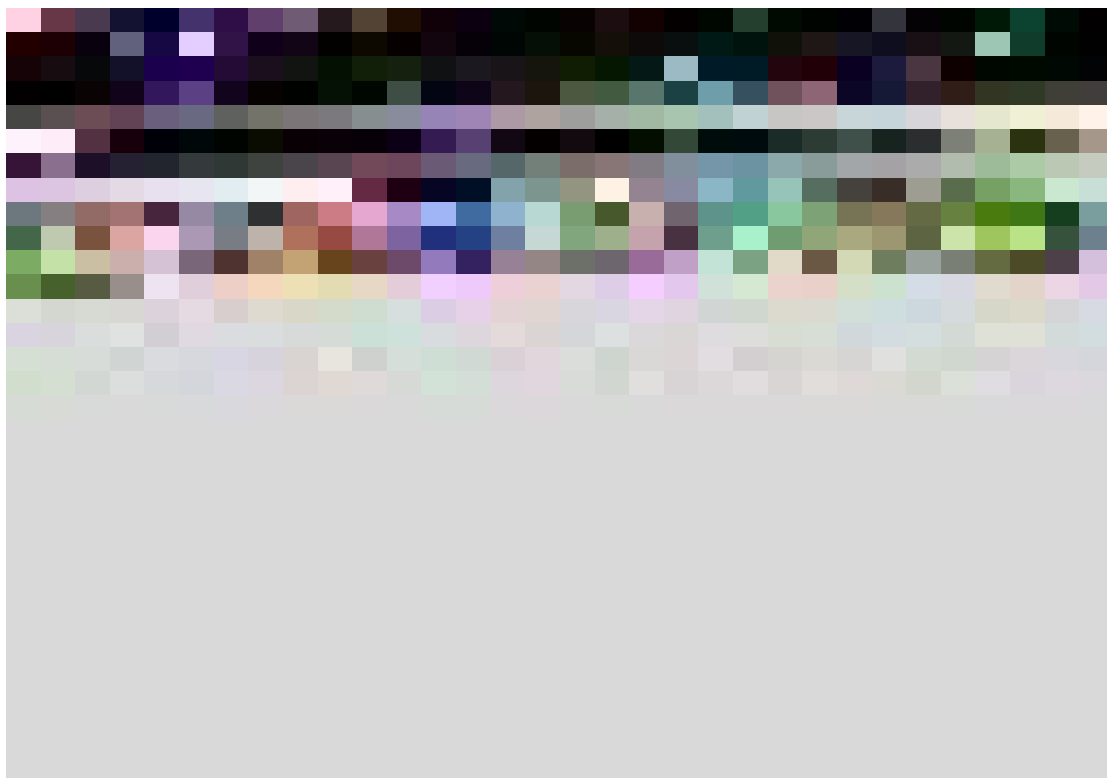

$^1\text{H}$  NMR of **3-23**

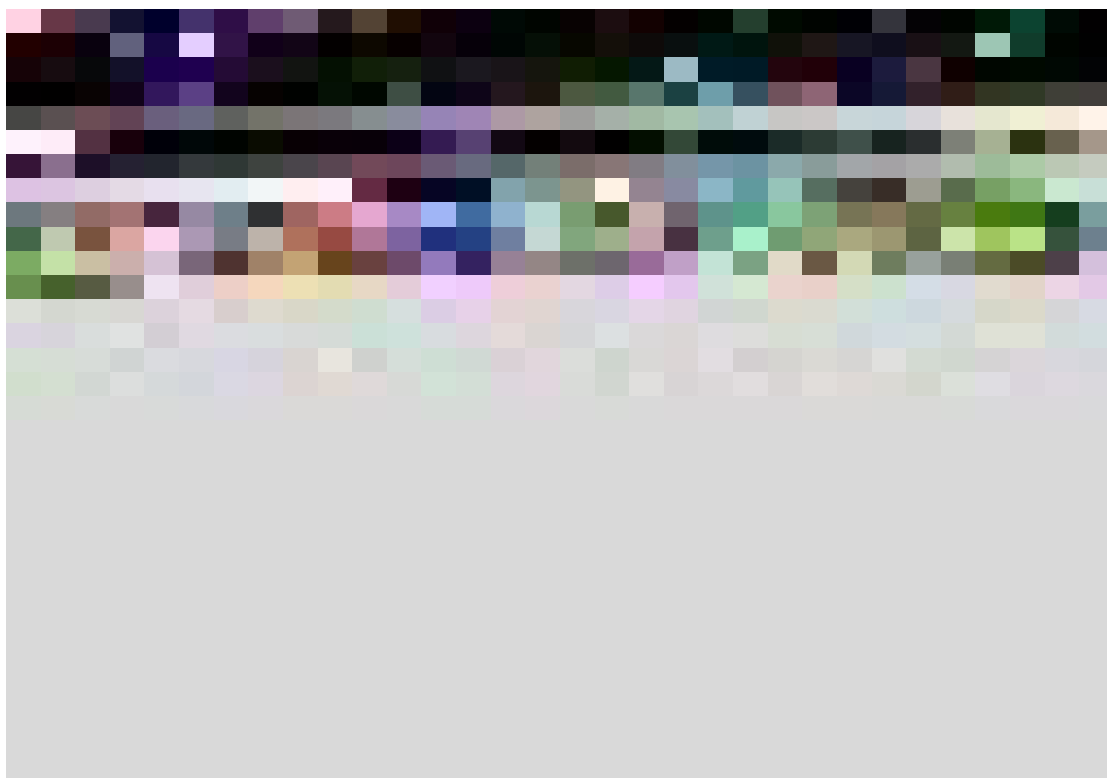

$^{13}\text{C}$  NMR of **3-23**



<sup>1</sup>H NMR of 3-24



<sup>13</sup>C NMR of 3-24





<sup>1</sup>H NMR of **3-25**



<sup>13</sup>C NMR of **3-25**



$^1\text{H}$  NMR of **3-26**

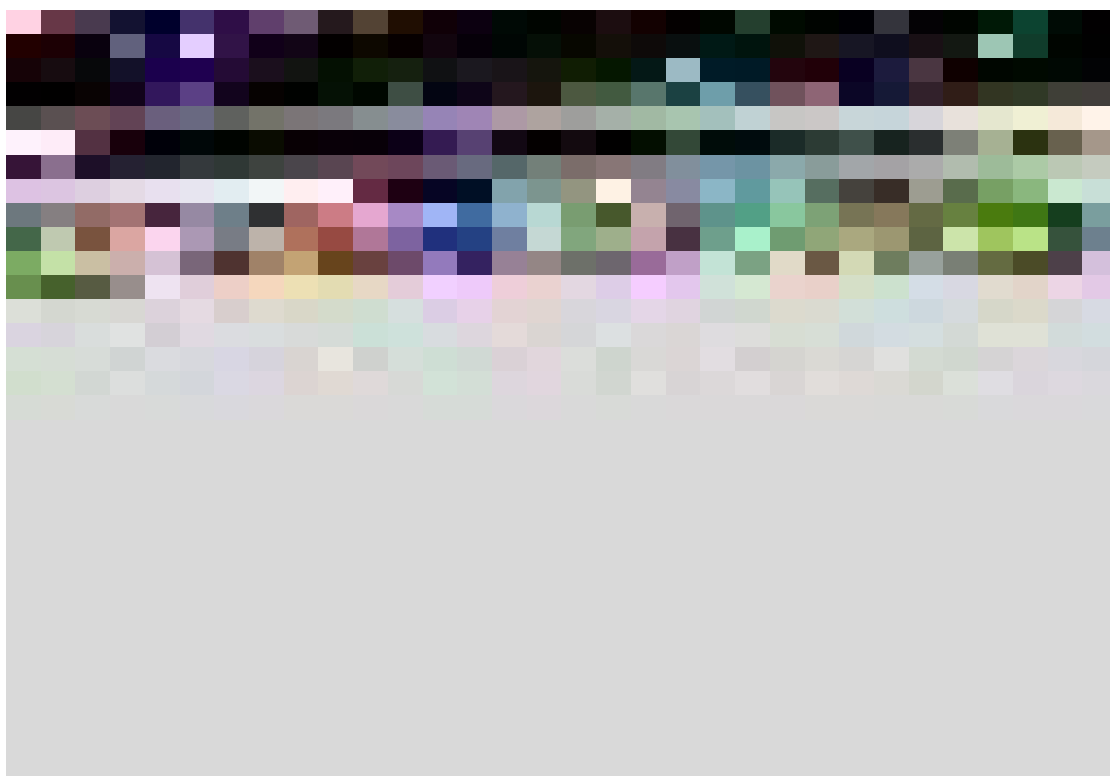

$^{13}\text{C}$  NMR of **3-26**

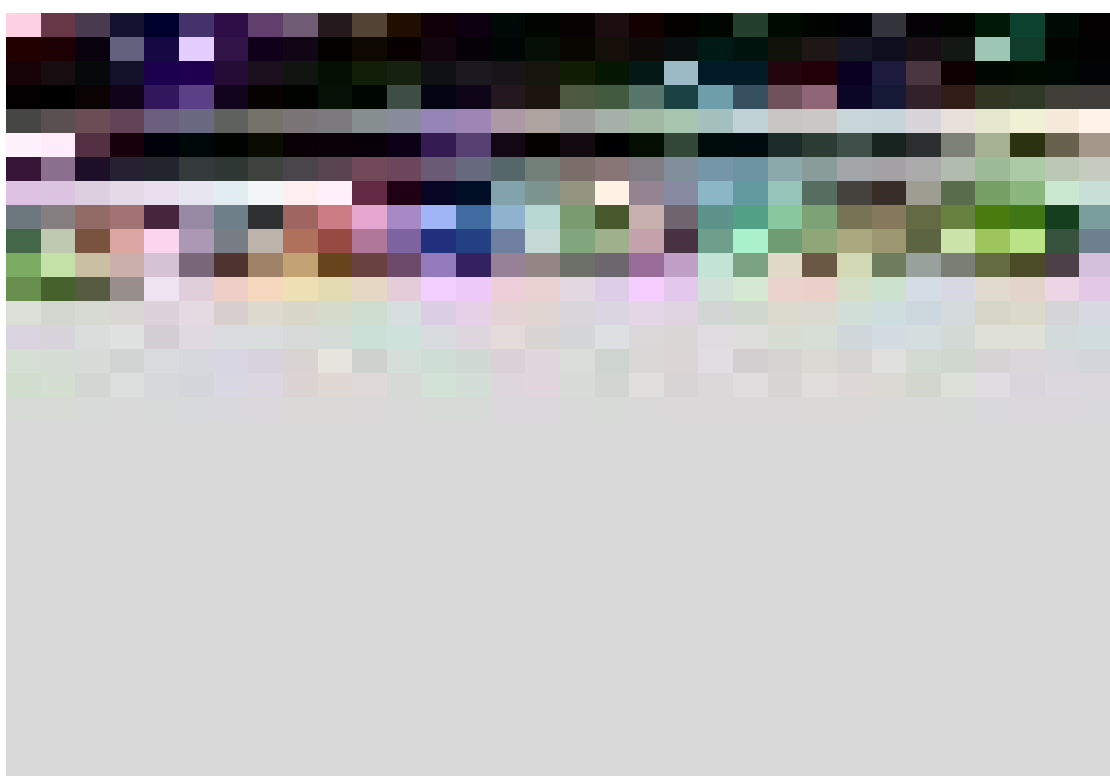

$^1\text{H}$  NMR of **3-27**

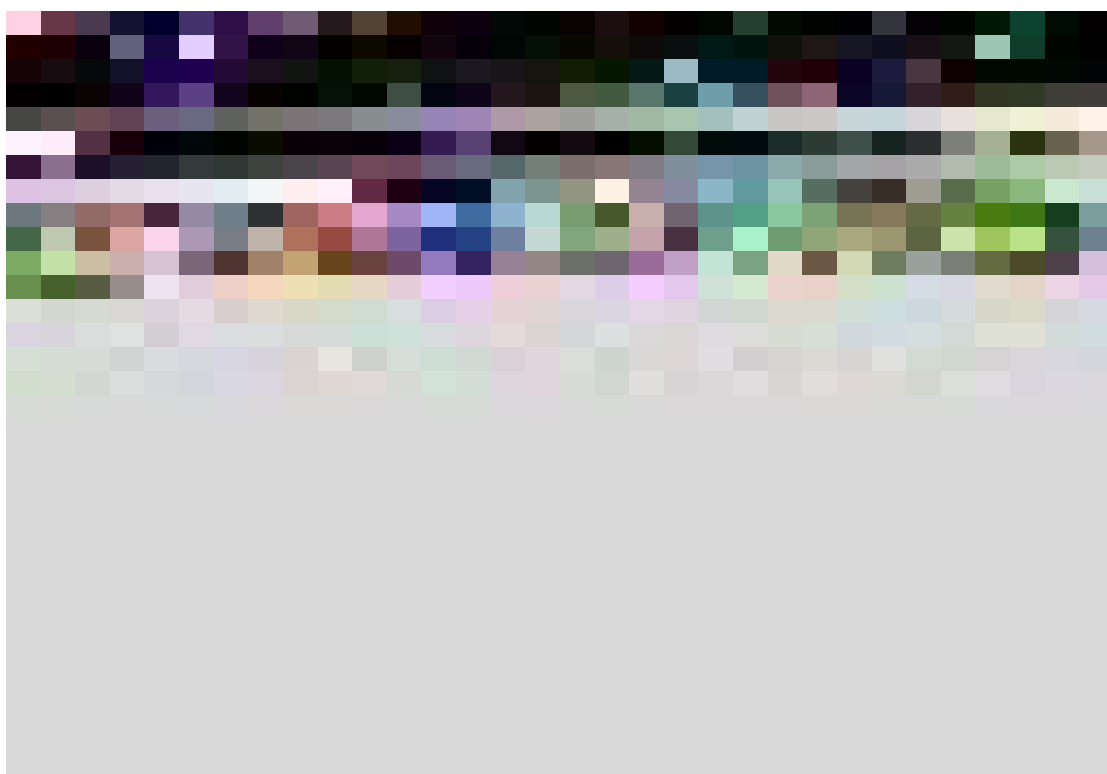

$^{13}\text{C}$  NMR of **3-27**

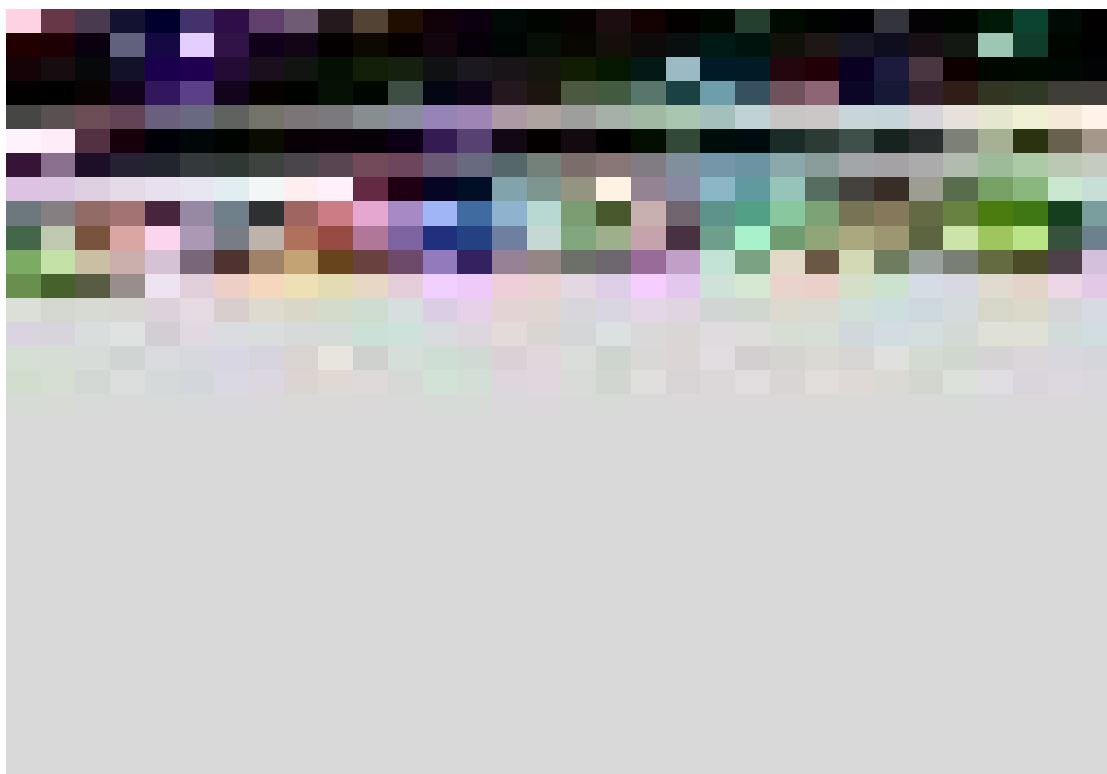

$^1\text{H}$  NMR of **3-28**

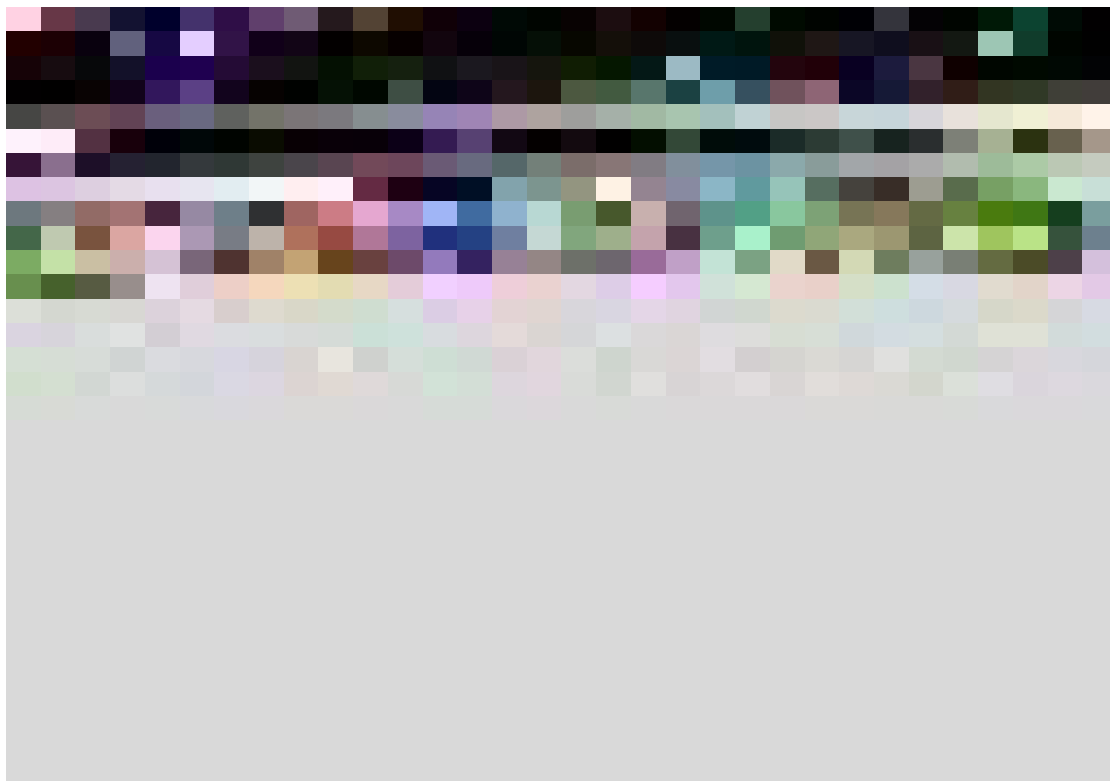

$^{13}\text{C}$  NMR of **3-28**

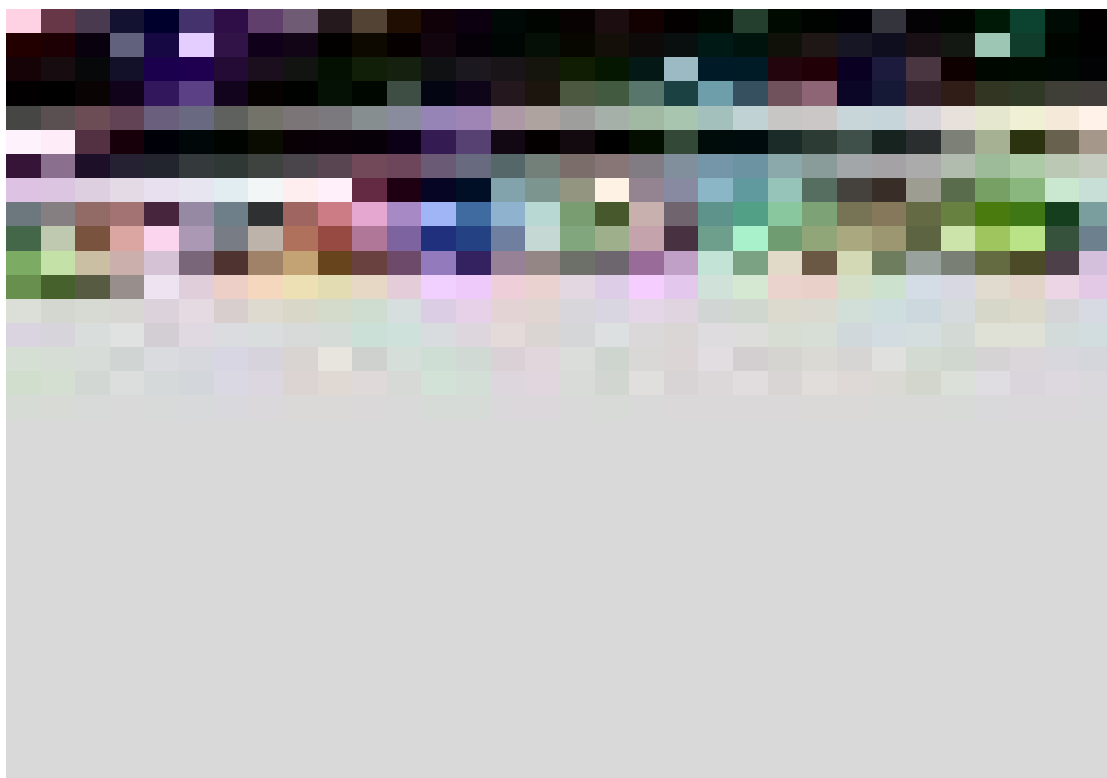

<sup>1</sup>H NMR of **3-29**



<sup>13</sup>C NMR of **3-29**

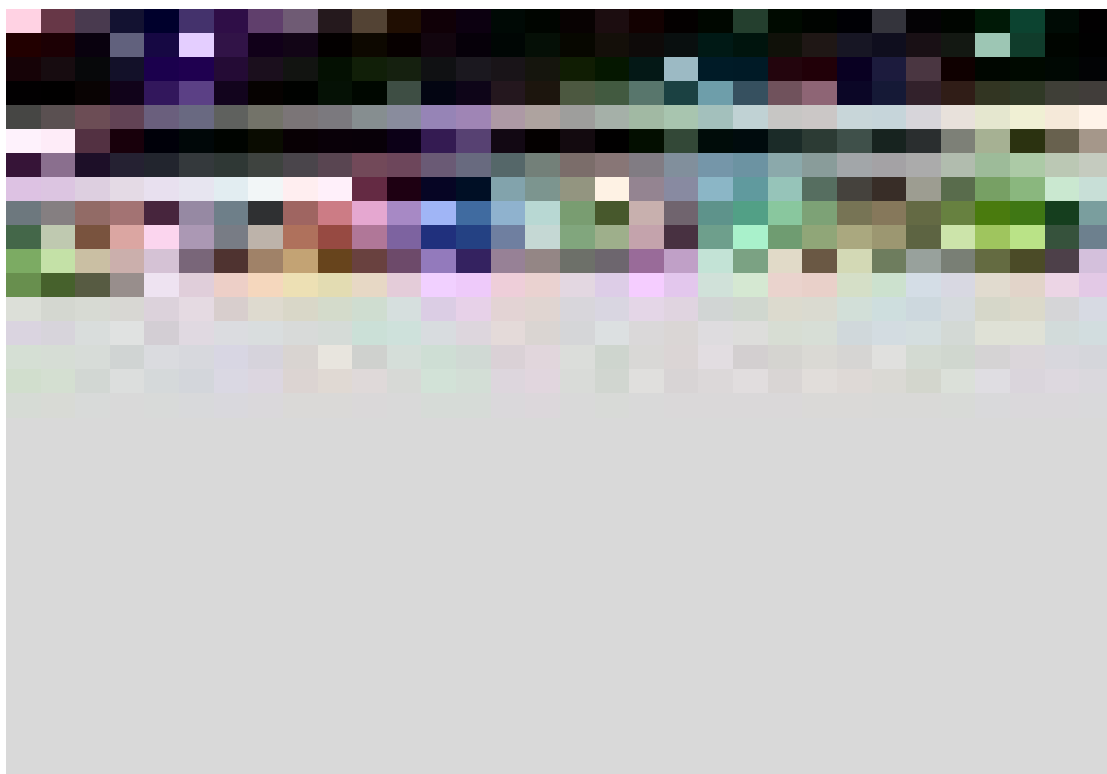

<sup>1</sup>H NMR of **3-30**

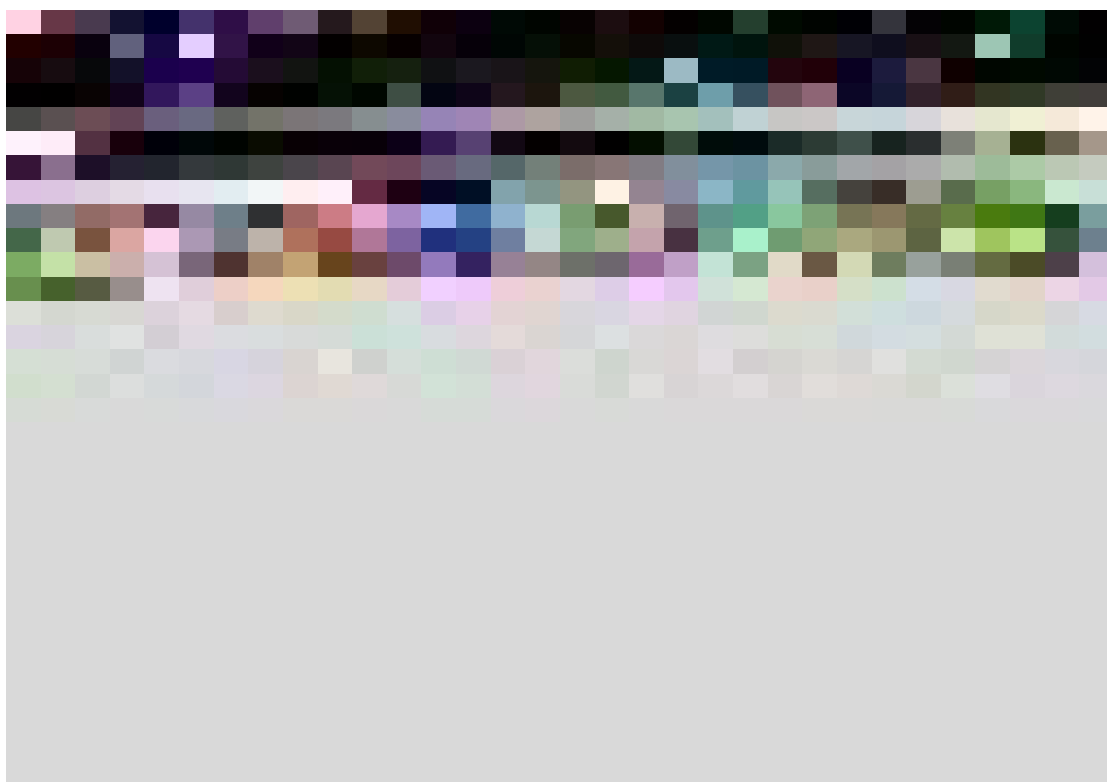

<sup>13</sup>C NMR of **3-30**



$^1\text{H}$  NMR of **3-31**



$^{13}\text{C}$  NMR of **3-31**





$^1\text{H}$  NMR of **3-32**



$^{13}\text{C}$  NMR of **3-32**

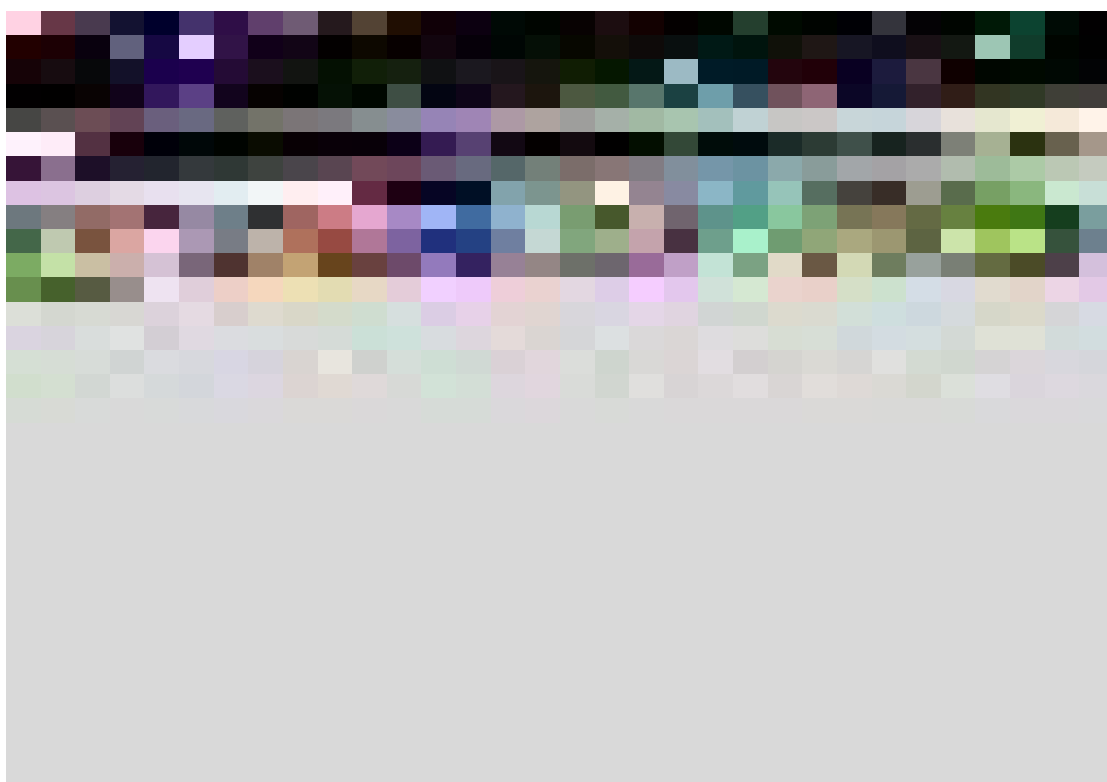

$^1\text{H}$  NMR of **3-33**

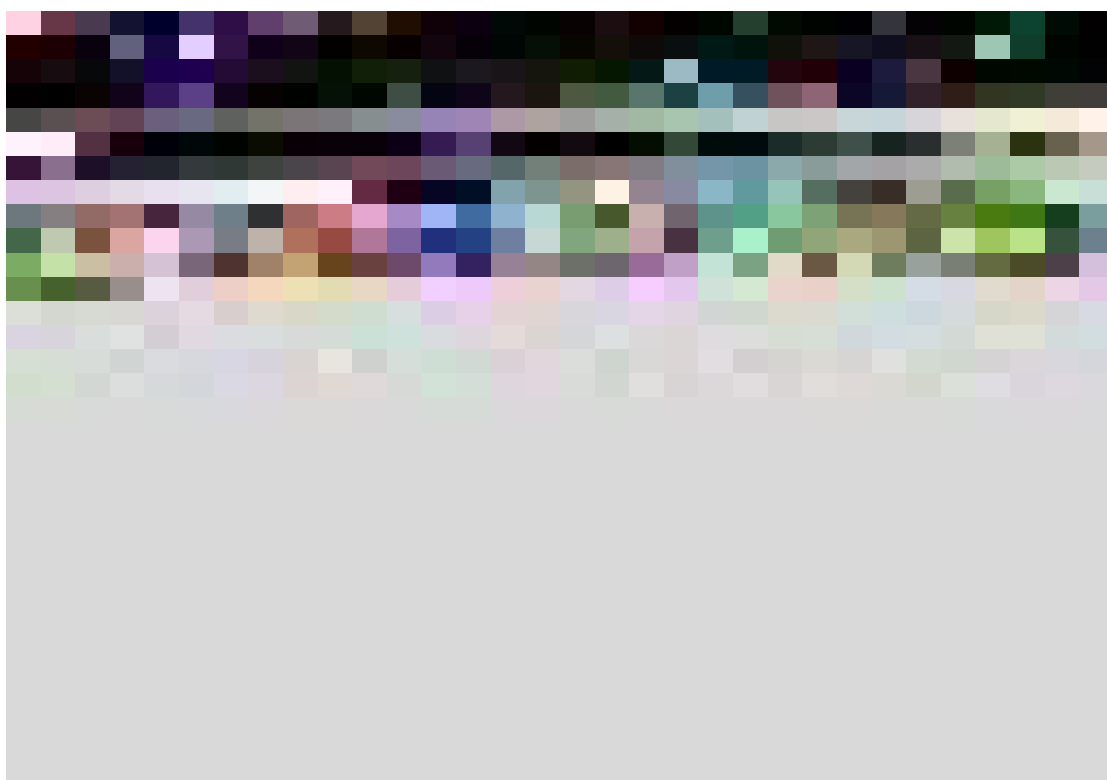

$^{13}\text{C}$  NMR of **3-33**

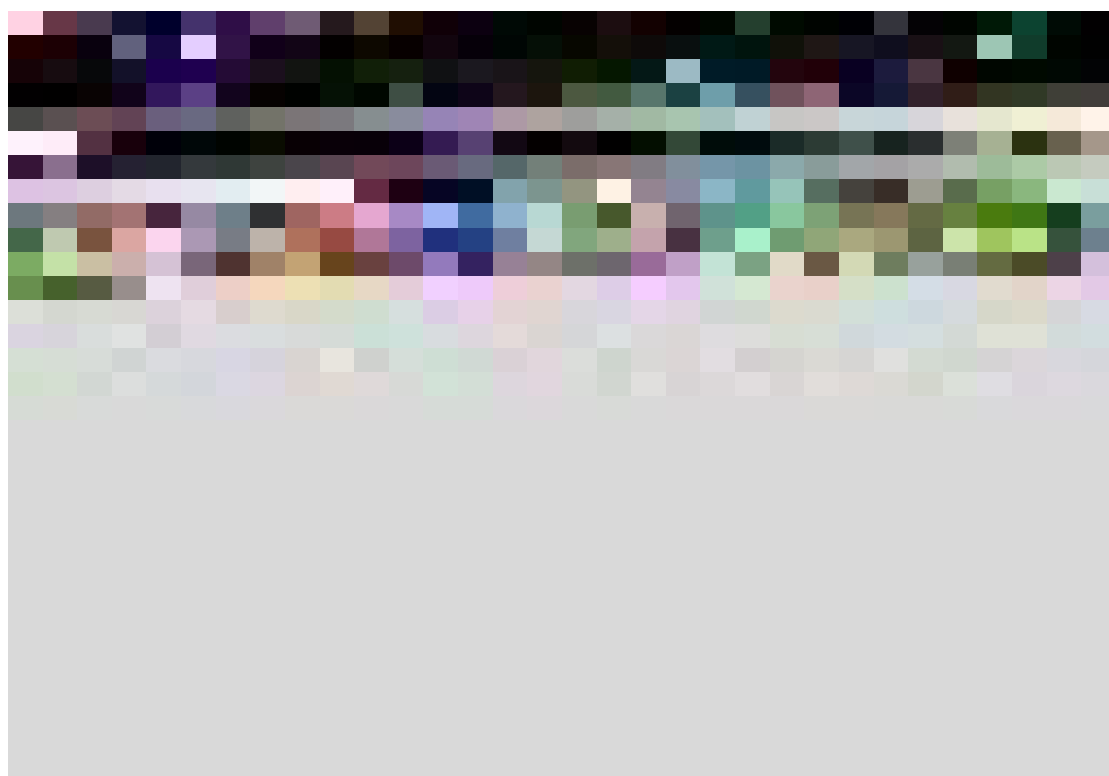

$^1\text{H}$  NMR of **3-34**



$^{13}\text{C}$  NMR of 3-34

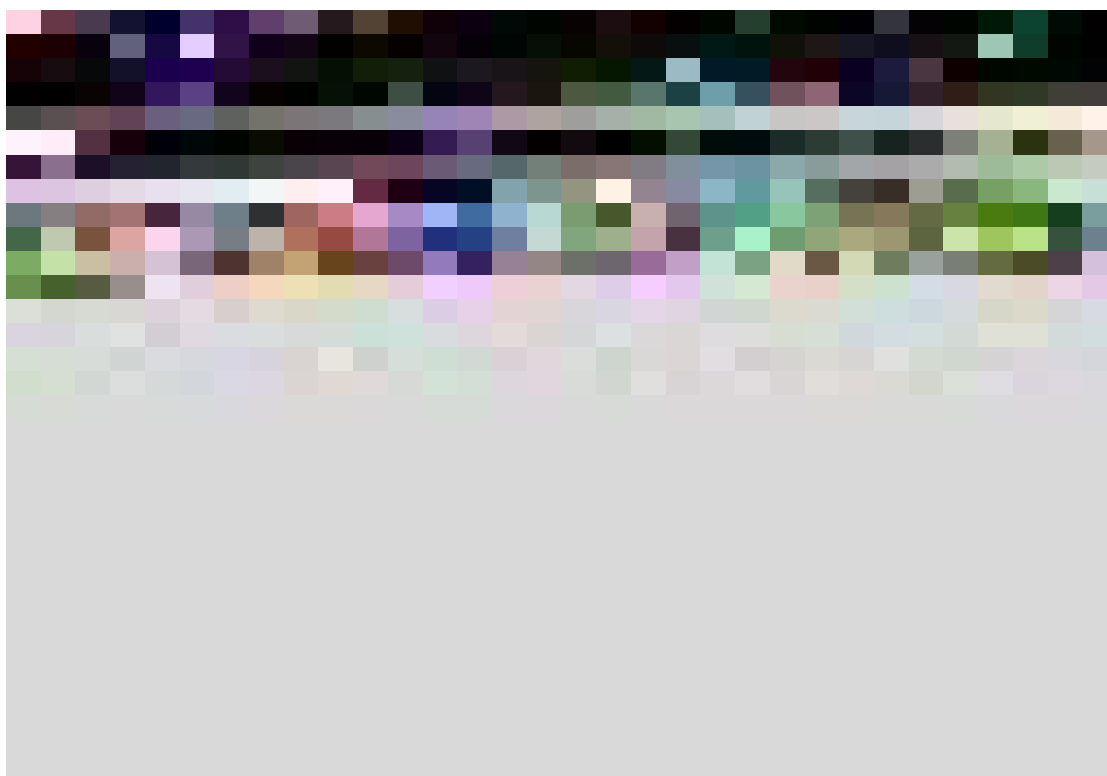

$^1\text{H}$  NMR of 3-35

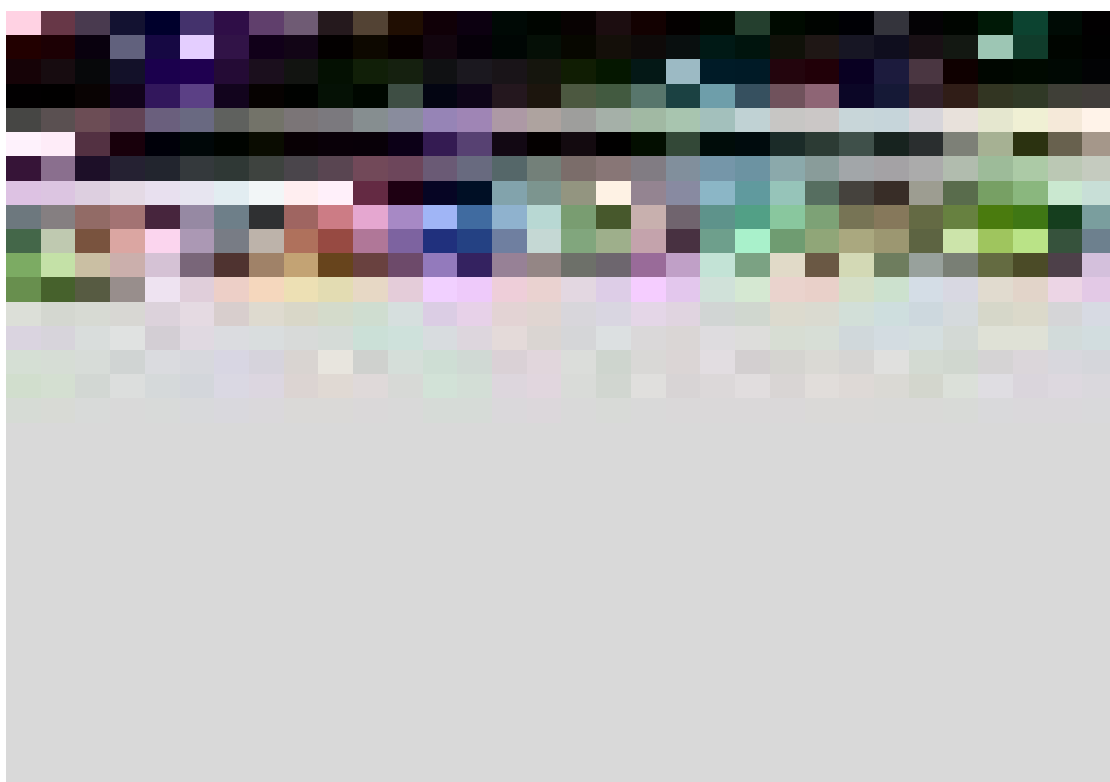

$^{13}\text{C}$  NMR of **3-35**



$^1\text{H}$  NMR of **3-36** (cis)



$^{13}\text{C}$  NMR of **3-36** (cis)



$^1\text{H}$  NMR of **3-36** (trans)



$^{13}\text{C}$  NMR of **3-36** (trans)

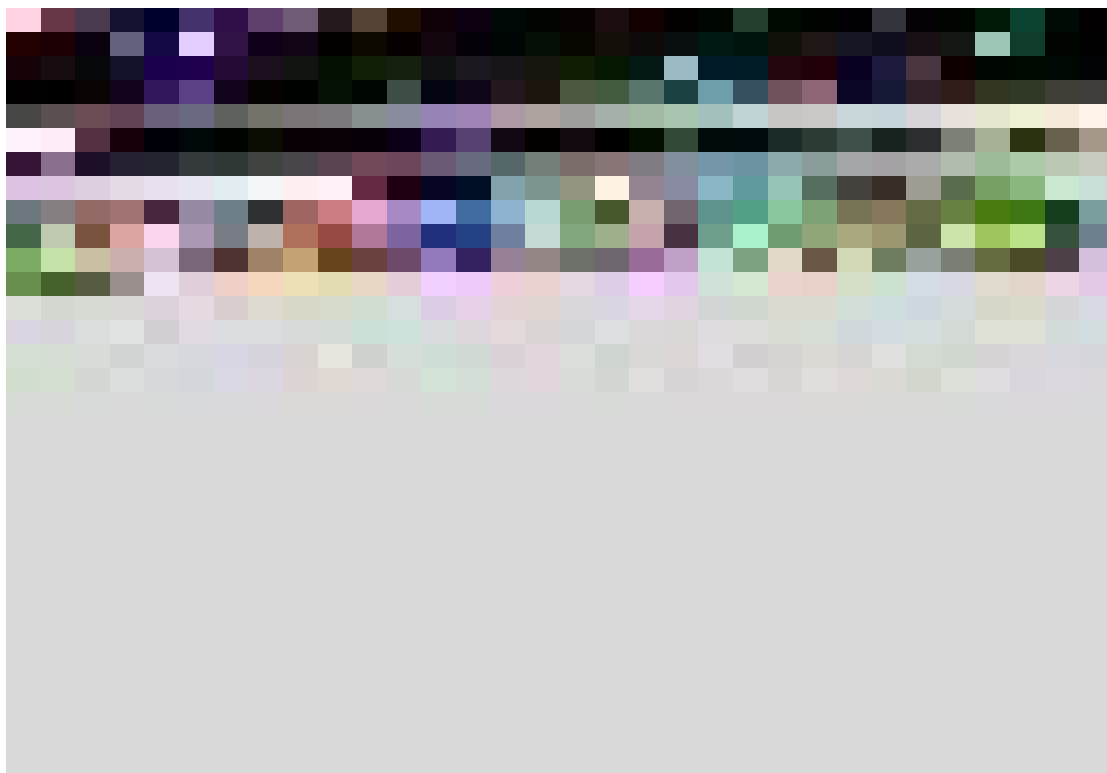

$^1\text{H}$  NMR of **3-37** (cis)





$^{13}\text{C}$  NMR of **3-37** (cis)



$^1\text{H}$  NMR of **3-37** (trans)



$^{13}\text{C}$  NMR of **3-37** (trans)



$^1\text{H}$  NMR of **3-38** (cis)



$^{13}\text{C}$  NMR of **3-38** (cis)



$^1\text{H}$  NMR of **3-38** (trans)



$^{13}\text{C}$  NMR of **3-38** (trans)



$^1\text{H}$  NMR of **3-39** (cis)



$^{13}\text{C}$  NMR of **3-39** (cis)

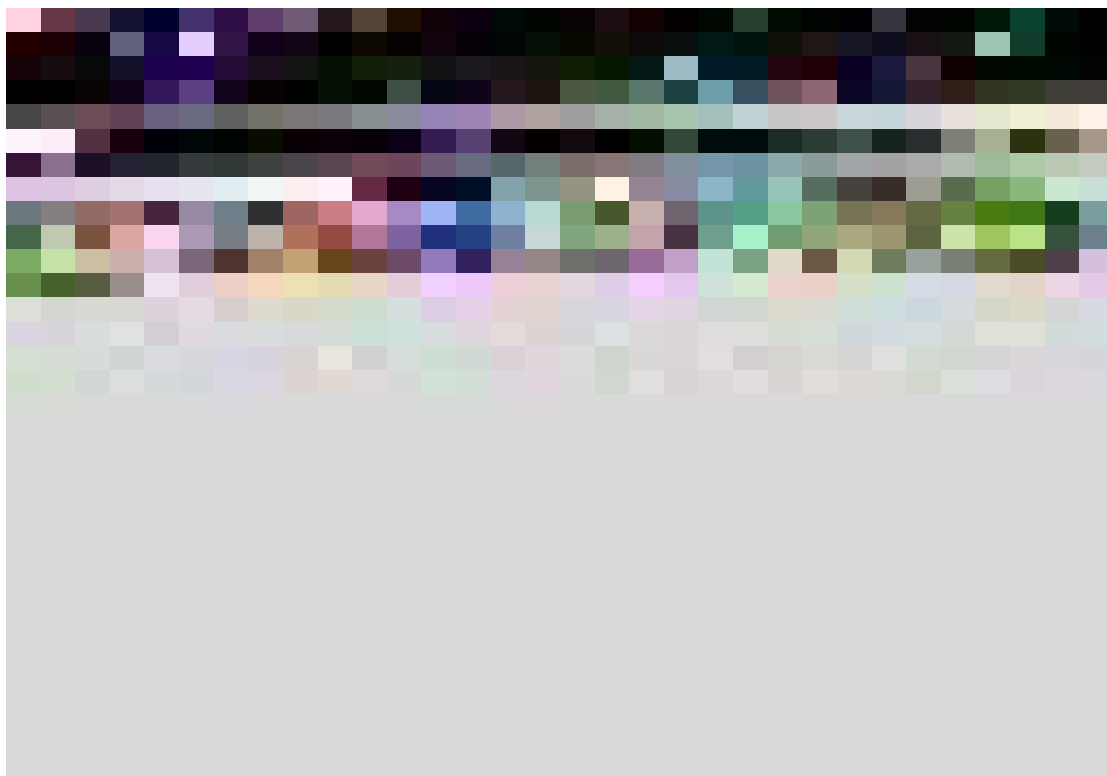

$^1\text{H}$  NMR of **3-39** (trans)



$^{13}\text{C}$  NMR of **3-39** (trans)



$^1\text{H}$  NMR of **3-40** (cis)



$^{13}\text{C}$  NMR of **3-40** (cis)



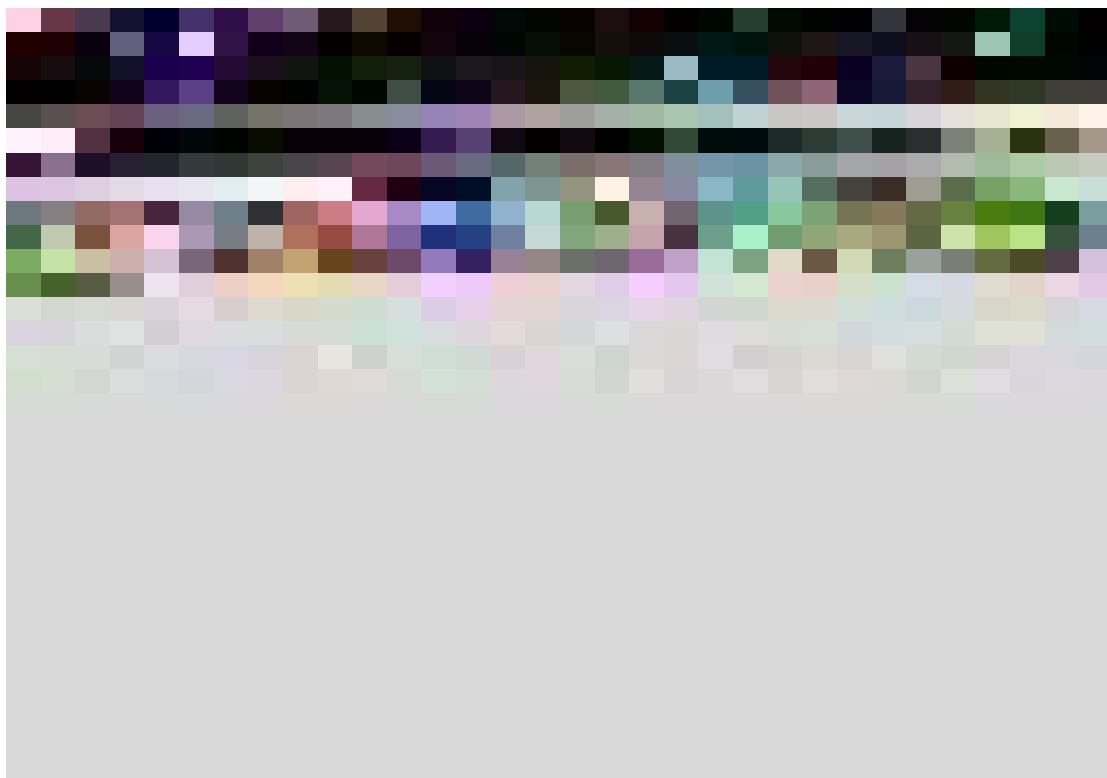

$^1\text{H}$  NMR of **3-40** (trans)



$^{13}\text{C}$  NMR of **3-40** (trans)



$^1\text{H}$  NMR of **3-41** (cis)

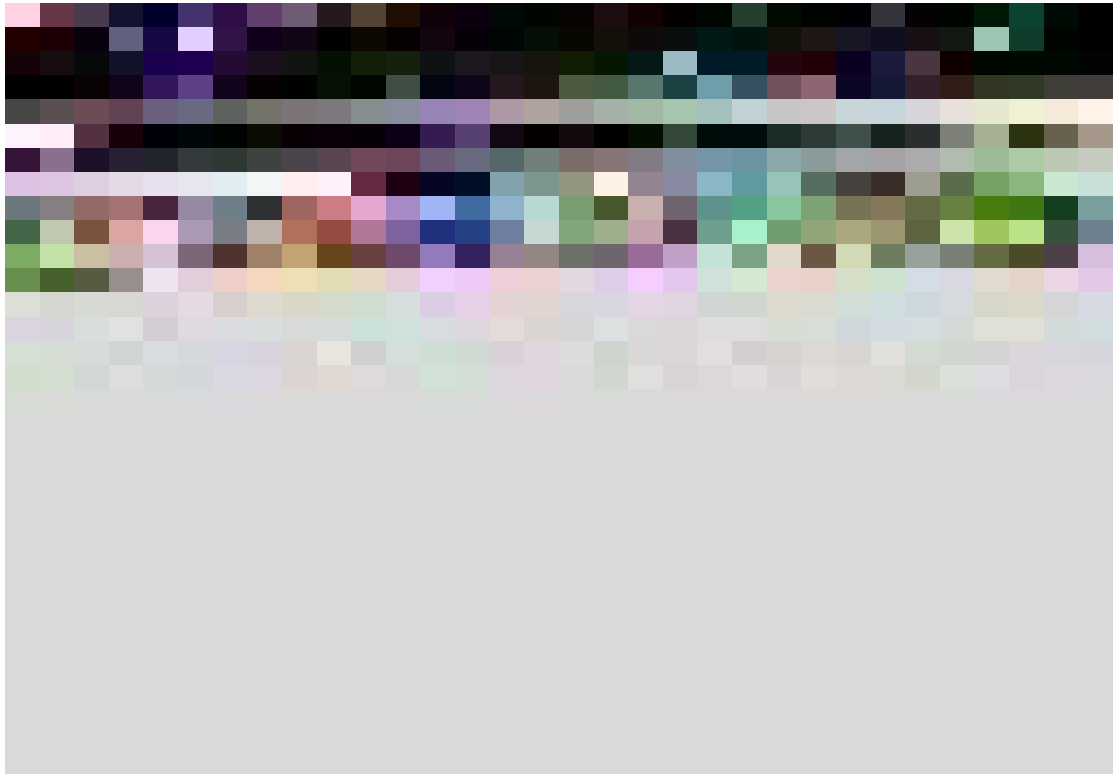

$^{13}\text{C}$  NMR of **3-41** (cis)

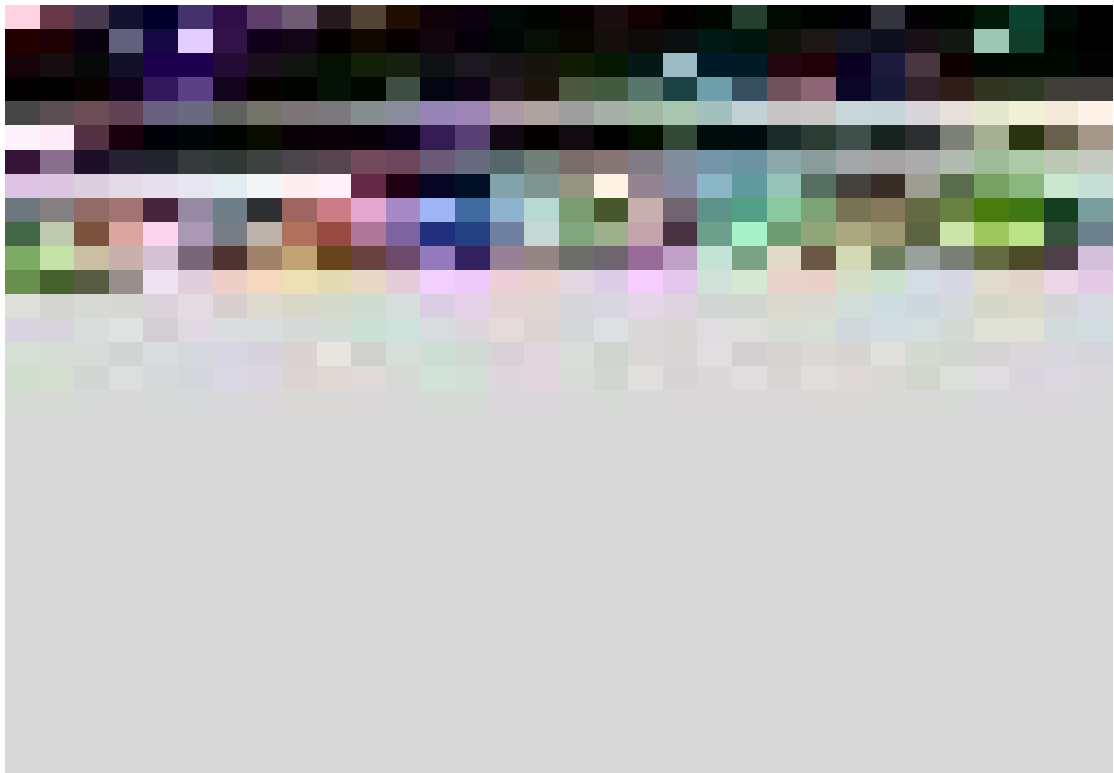

$^1\text{H}$  NMR of **3-41** (trans)

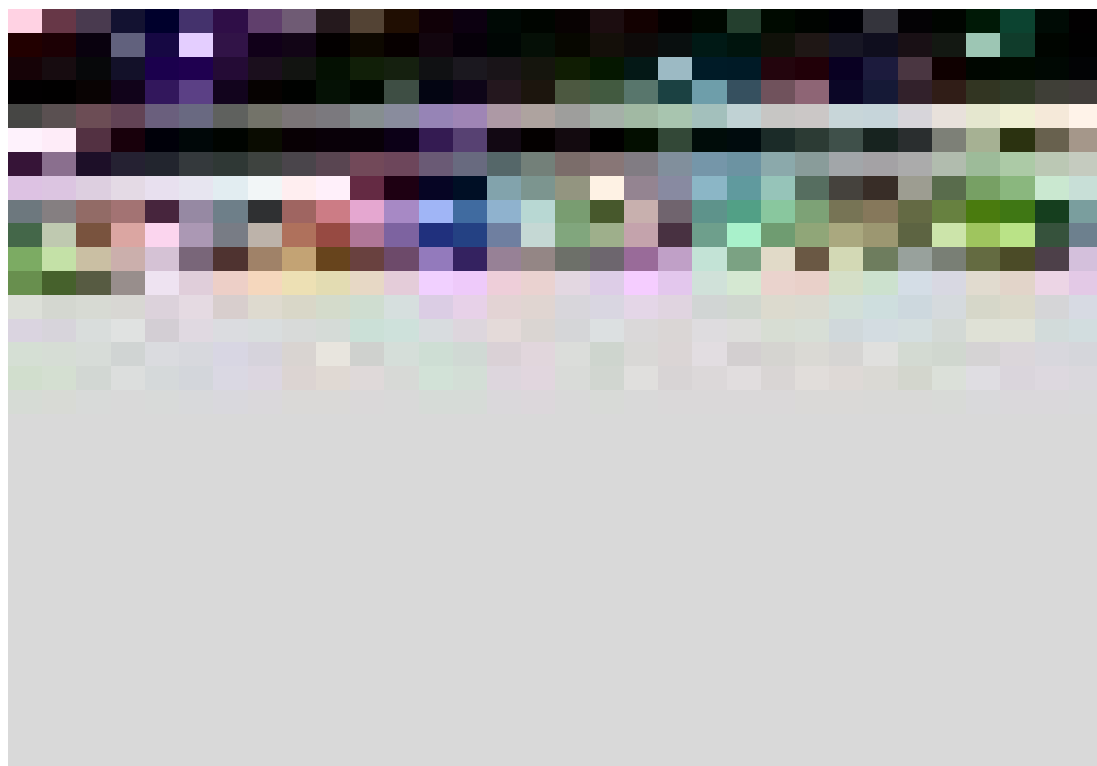

$^{13}\text{C}$  NMR of **3-41** (trans)



<sup>1</sup>H NMR of 3-42



<sup>13</sup>C NMR of 3-42



<sup>1</sup>H NMR of 4-1



<sup>13</sup>C NMR of 4-1



$^1\text{H}$  NMR of 4-2



$^{13}\text{C}$  NMR of 4-2

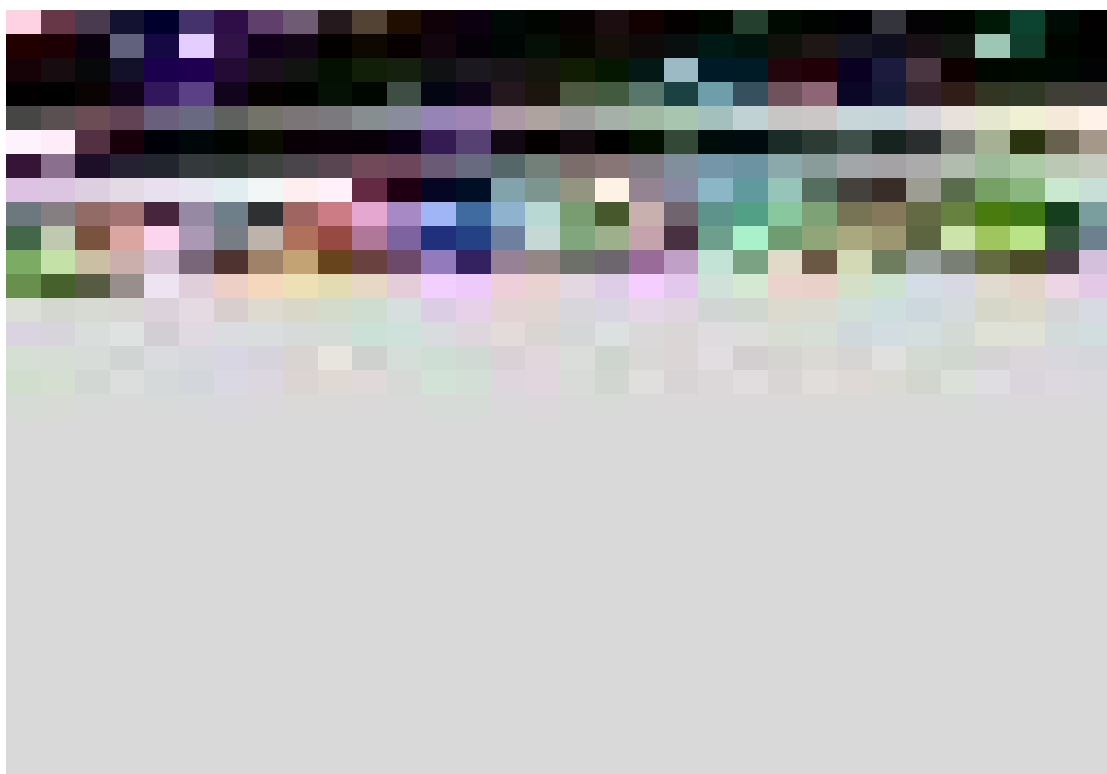

$^1\text{H}$  NMR of 4-3





$^{13}\text{C}$  NMR of **4-3**

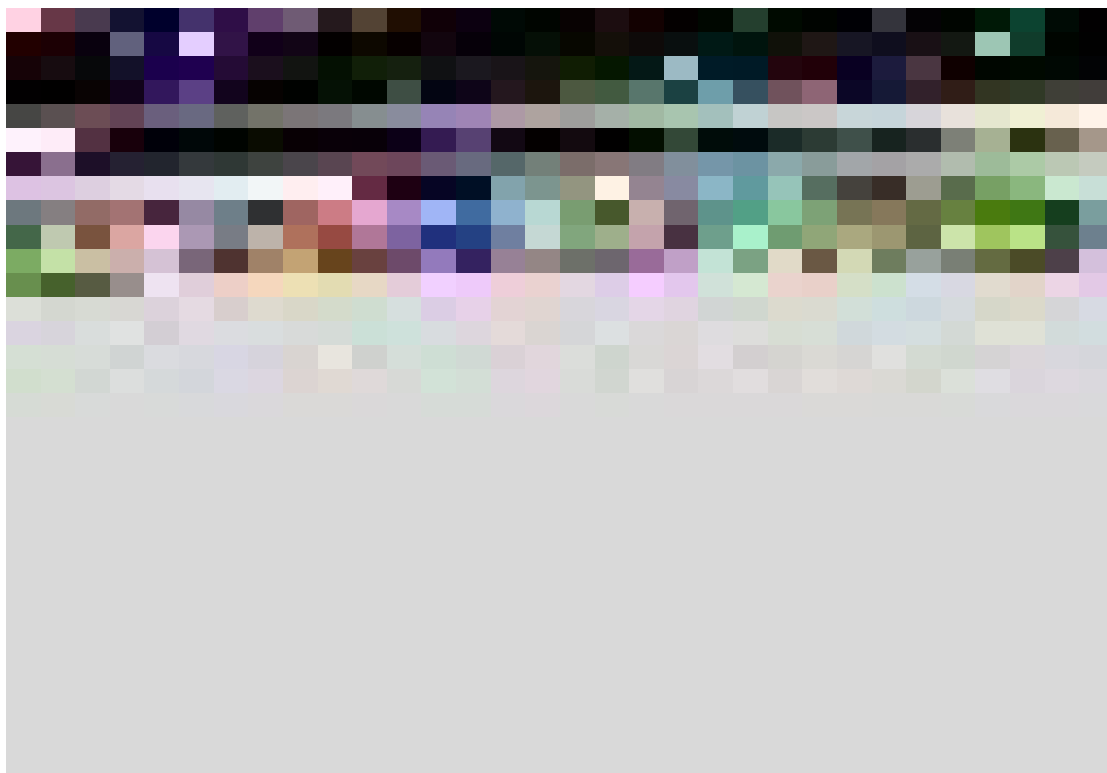

$^1\text{H}$  NMR of **4-4**



$^{13}\text{C}$  NMR of **4-4**
